# Supplementary material for: Persistence of SARS-CoV-2 IgG and Its Avidity Compared with Neutralizing Antibodies among Health Care Workers in a Tertiary Care Hospital, South India – a One Year Follow Up Study
Source: Preprints.org preprint supplement (doi:10.20944/preprints202309.1211.v1), 2023-09-19
Supplement: Supplementary file 1 [file supplementary]

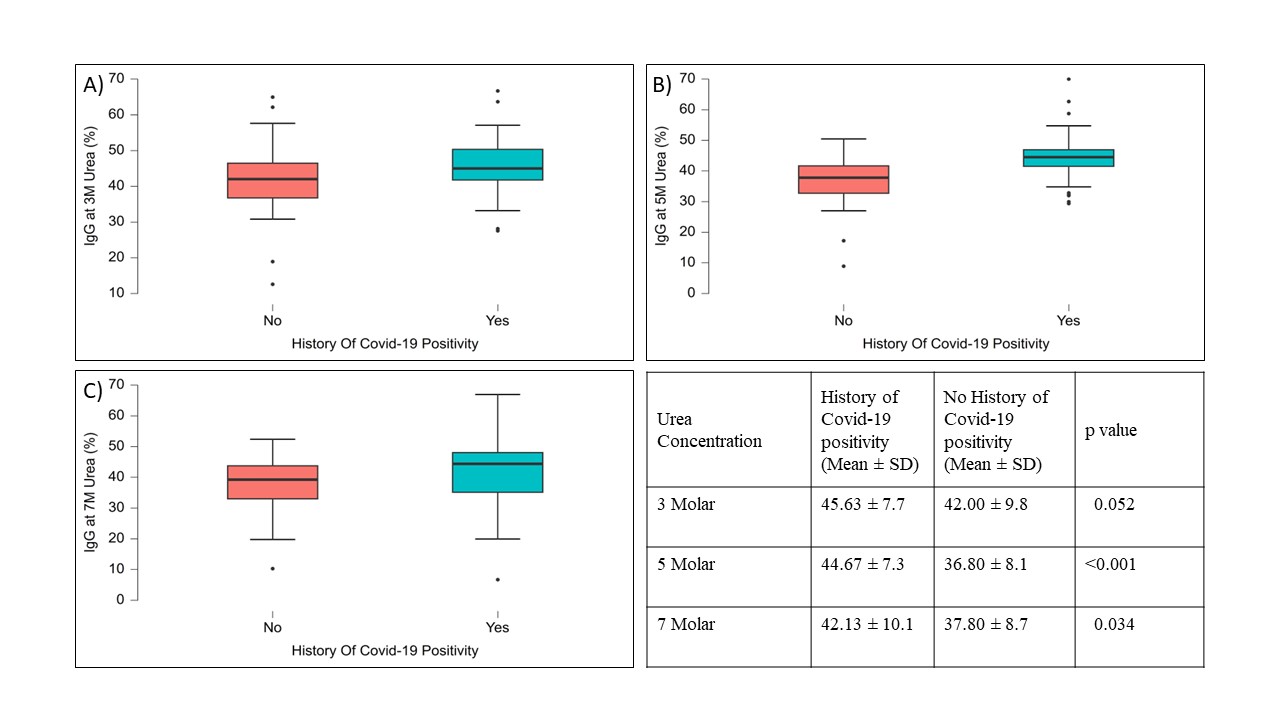


**Figure S7:** Boxplot representing SARS-CoV-2 IgG antibody avidity percentage compared with History of COVID-19 positivity by graded Urea concentrations A) 3molar urea B) 5molar urea and C) 7 molar urea concentration, p-value calculated by using student t-test.


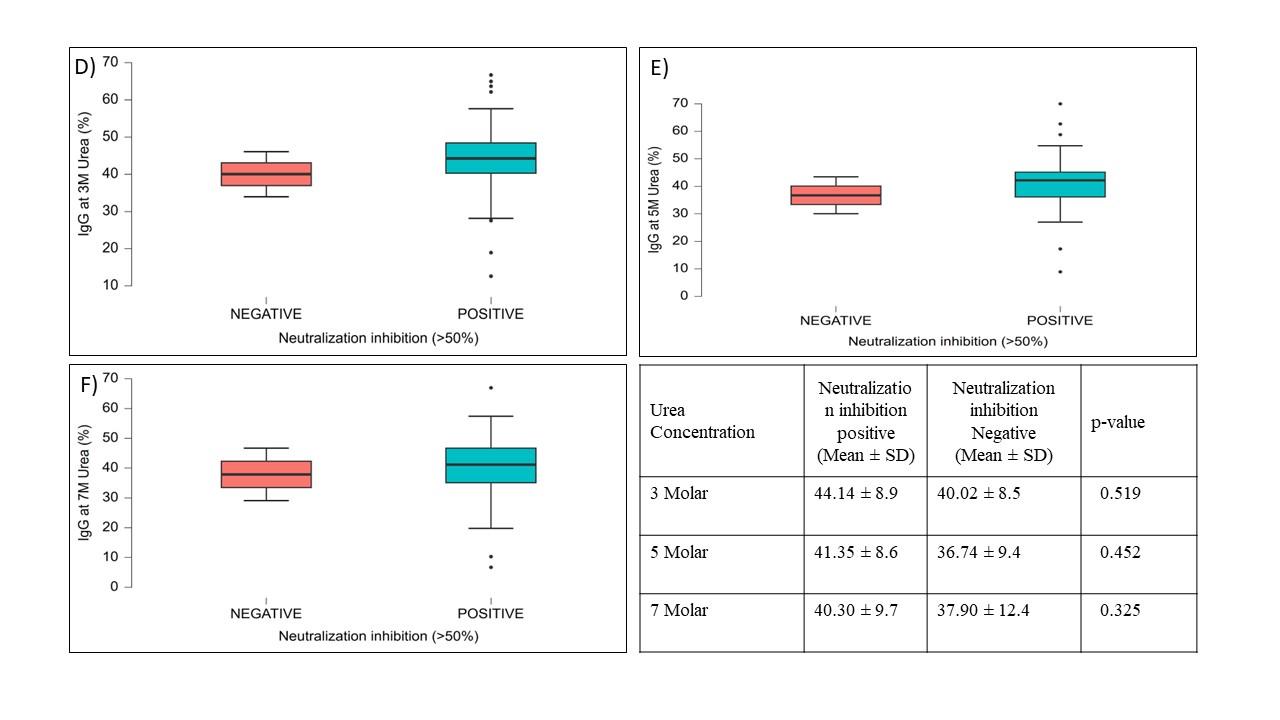
 **Figure S8:** Boxplot representing SARS-CoV-2 IgG antibody avidity percentage compared with Neutralization inhibition percentage (>50%) by graded Urea concentrations D) 3molar urea E) 5molar urea and F) 7 molar urea concentration, p-value calculated by using student t-test.


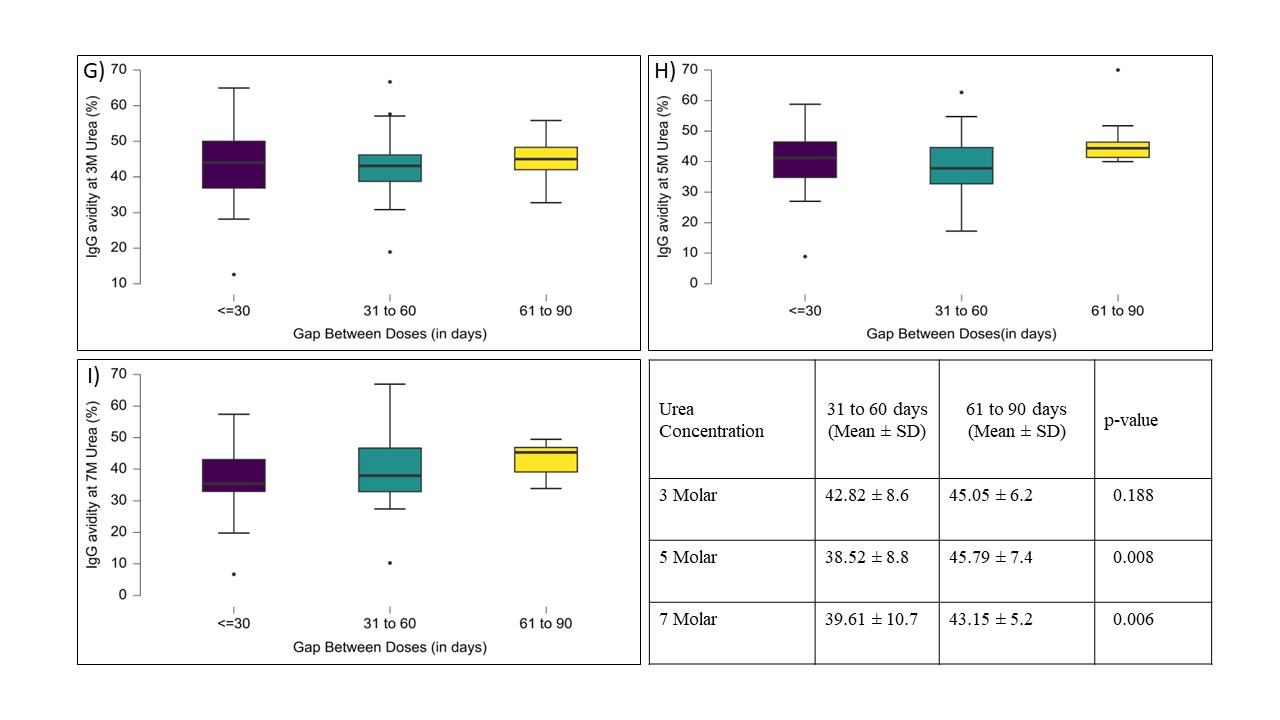


**Figure S9**: Boxplot representing SARS-CoV-2 IgG antibody avidity percentage compared with gap between the first and second dose of vaccination by graded Uera concentrations G) 3molar urea H) 5molar urea and I) 7 molar urea concentration, p-value calculated by using student t-test.
