# Supplementary material for: Persistence of SARS-CoV-2 IgG and Its Avidity Compared with Neutralizing Antibodies among Health Care Workers in a Tertiary Care Hospital, South India – a One Year Follow Up Study
Source: Preprints.org preprint supplement (doi:10.20944/preprints202309.1211.v1), 2023-09-19
Supplement: Supplementary file 2 [file SUPLYMENTARY FILE 1.xlsx]

## Sheet: SELECTED
Demographic								Vaccination and Covid Positivity Data						Phyisical and Environmental factors														Initial results				Follow-up results
Index	[Full Name] First Name	Gender	Age Complited	Designation	BLOOD GROUP	Rh +VE	Category	Vaccination Status	Name Of Vaccine	Gap Between Doses(in days)	Post Vaccination Symtoms	History Of Covid-19 Positivity*	Severity of illness	Involved any in handling of covid-19 positive patient or sample handling	Any present illness	HEIGHT	WEIGHT	BMI	SMOKING	Alcoholic	Exercise	Sleeping pattern	Acute psychological stress	Chronic Psychological stress	Eating habits	Environmental factors	Family size	Neutralizing Ab %	RESULTS	IgG Ab Index	RESULTS	Neutralizing Ab %	RESULTS	IgG Ab Index	RESULTS
1	GAYATHRI	Female	25	DATA ENTRY OPERATOR	O GROUP	Rh+VE	Svims Administrative Staff	Yes	COVISHEILD	45	None	No	NA	Yes	NILL	5.5	65	23.8	No	No	NONE	7-8hrs	No	yes	NONVEGETARIAN	urban	NUCLAR	97.53	POSITIVE	5.51	POSITIVE	#N/A	#N/A	#N/A	#N/A
2	CHAND BASHA	Male	29	LAB TECHNICIAN	O GROUP	Rh+VE	Laboratory Technician	Yes	COVISHEILD	21	None	No	NA	Yes	NILL	5.11	64	19.7	No	No	NONE	< 7hrs	No	no	NONVEGETARIAN	urban	NUCLAR	52.56	POSITIVE	0.93	NEGATIVE	93.9677	POSITIVE	37.3126	POSITIVE
Z	DILLIBABU	Male	32	LAB TECHNICIAN	AB GROUP	Rh+VE	Laboratory Technician	Yes	COVISHEILD	30	None	No	NA	Yes	NILL	5.3	75	29.3	No	No	NONE	7-8hrs	No	no	NONVEGETARIAN	urban	NUCLAR	47.32	NEGATIVE	0.77	NEGATIVE	61.23	POSITIVE	35.89	POSITIVE
4	ROSHAN	Male	25	LAB TECHNICIAN	A GROUP	Rh+VE	Laboratory Technician	Yes	COVISHEILD	32	Headache,Irritability	No	NA	Yes	NILL	5.5	82	30.1	No	No	weekly	7-8hrs	No	no	NONVEGETARIAN	urban	SINGLE	98.07	POSITIVE	8.68	POSITIVE	#N/A	#N/A	#N/A	#N/A
5	KRISHNAMURTHY	Male	40	PA	B GROUP	Rh+VE	Svims Administrative Staff	Yes	COVISHEILD	32	None	Yes	Asymptomatic	Yes	NILL	5.6	68	24.2	No	No	daily	< 7hrs	No	no	NONVEGETARIAN	urban	NUCLAR	97.1	POSITIVE	4.74	POSITIVE	85.7463	POSITIVE	12.3807	POSITIVE
6	NARASIMHULU	Male	29	PA	O GROUP	Rh+VE	Svims Administrative Staff	Yes	COVISHEILD	32	Fever	Yes	Moderate	Yes	NILL	5.9	72	23.4	No	No	weekly	7-8hrs	No	no	NONVEGETARIAN	urban	NUCLAR	98.38	POSITIVE	9.65	POSITIVE	62.2761	POSITIVE	47.7327	POSITIVE
7	HARI	Male	30	PA	O GROUP	Rh+VE	Svims Administrative Staff	Yes	COVISHEILD	84	Myalgia	No	NA	Yes	NILL	5.11	80	24.6	No	No	NONE	7-8hrs	No	no	NONVEGETARIAN	urban	GAINT FAMILY	67.66	POSITIVE	3.6	POSITIVE	90.9204	POSITIVE	41.3699	POSITIVE
8	SWARNASRITEJA	Female	30	DEO	O GROUP	Rh+VE	Svims Administrative Staff	Yes	COVISHEILD	37	Fever,Headache,Myalgia	No	NA	Yes	NILL	5.4	50	18.9	No	No	NONE	< 7hrs	Yes	no	VEGETARIAN	urban	GAINT FAMILY	96.69	POSITIVE	7.04	POSITIVE	#N/A	#N/A	#N/A	#N/A
9	LOKESH	Male	24	DEO	B GROUP	Rh-VE	Svims Administrative Staff	Yes	COVISHEILD	84	Myalgia	No	NA	Yes	NILL	5.5	60	22	No	No	weekly	< 7hrs	No	no	NONVEGETARIAN	urban	SINGLE	38.36	NEGATIVE	0.71	NEGATIVE	55.23	POSITIVE	29.25	POSITIVE
10	CHINNA	Female	27	DEO	O GROUP	Rh+VE	Svims Administrative Staff	Yes	COVISHEILD	85	Fever,Myalgia	No	NA	Yes	NILL	5.2	40	16.1	No	No	NONE	7-8hrs	No	no	NONVEGETARIAN	urban	NUCLAR	72.95	POSITIVE	0.82	NEGATIVE	96.107	POSITIVE	29.5442	POSITIVE
11	SARITHA	Female	34	DEO	O GROUP	Rh+VE	Svims Administrative Staff	Yes	COVISHEILD	32	Fever,Myalgia	No	NA	Yes	NILL	5.1	50	20.8	No	No	daily	7-8hrs	No	no	VEGETARIAN	urban	NUCLAR	59.96	POSITIVE	7.43	POSITIVE	#N/A	#N/A	#N/A	#N/A
12	LAKSHMIPATHI	Male	47	ELECTRICIAN	O GROUP	Rh+VE	OTHERS	Yes	COVISHEILD	84	None	No	NA	No	NILL	5.7	99	34.2	No	No	NONE	> 8hrs	Yes	yes	NONVEGETARIAN	urban	NUCLAR	97.67	POSITIVE	13.29	POSITIVE	86.9652	POSITIVE	20.8938	POSITIVE
13	PRASADBABU	Male	46	ELECTRICIAN	O GROUP	Rh+VE	OTHERS	Yes	Covaxin	41	None	No	NA	No	NILL	5.5	70	25.7	No	Yes	weekly	7-8hrs	No	no	NONVEGETARIAN	urban	NUCLAR	80.51	POSITIVE	2.38	POSITIVE	95.5438	POSITIVE	15.4041	POSITIVE
14	PRASAD	Male	28	LAB TECHNICIAN	O GROUP	Rh+VE	Laboratory Technician	Yes	COVISHEILD	28	Headache,Irritability	No	NA	Yes	NILL	5.4	75	28.4	No	No	NONE	7-8hrs	No	no	NONVEGETARIAN	urban	NUCLAR	71.87	POSITIVE	2.34	POSITIVE	#N/A	#N/A	#N/A	#N/A
15	SUNIL	Male	31	LAB TECHNICIAN	B GROUP	Rh+VE	Laboratory Technician	Yes	COVISHEILD	65	Irritability	No	NA	Yes	NILL	5.8	85	28.5	No	No	NONE	> 8hrs	No	no	NONVEGETARIAN	urban	NUCLAR	80.73	POSITIVE	2.23	POSITIVE	#N/A	#N/A	#N/A	#N/A
16	MASTHAN	Male	40	WORKER	O GROUP	Rh+VE	Multipurpose Worker	Yes	COVISHEILD	21	Fever,Headache,Myalgia,Irritability	No	NA	Yes	NILL	5.6	65	23.1	Yes	Yes	daily	> 8hrs	No	no	NONVEGETARIAN	urban	NUCLAR	5.61	NEGATIVE	0.77	NEGATIVE	#N/A	#N/A	#N/A	#N/A
17	VANITHA	Female	42	WORKER	UNKNOWN	UNKNOWN	OTHERS	Yes	COVISHEILD	28	Headache,Myalgia,Fever	No	NA	Yes	NILL	5.2	70	28.2	No	No	NONE	7-8hrs	No	no	NONVEGETARIAN	urban	SINGLE	95.1	POSITIVE	5.95	POSITIVE	#N/A	#N/A	#N/A	#N/A
18	BHARATH	Male	30	PA	B GROUP	Rh+VE	Svims Administrative Staff	Yes	COVISHEILD	40	Myalgia	Yes	Mild	Yes	NILL	5.8	82	27.5	No	No	NONE	7-8hrs	Yes	yes	NONVEGETARIAN	urban	NUCLAR	19.46	NEGATIVE	0.84	NEGATIVE	89.1915	POSITIVE	27.7792	POSITIVE
19	CHINNABABU	Male	33	LAB TECHNICIAN	AB GROUP	Rh+VE	Laboratory Technician	Yes	COVISHEILD	32	Myalgia,Headache,Fever	Yes	Moderate	Yes	NILL	5.6	56	19.9	No	Yes	weekly	7-8hrs	No	no	NONVEGETARIAN	urban	NUCLAR	95.87	POSITIVE	5.57	POSITIVE	#N/A	#N/A	#N/A	#N/A
20	MADHAVA	Male	30	MVSc	B GROUP	Rh+VE	Doctor/Clinician	Yes	COVISHEILD	84	Fever	Yes	Mild	Yes	NILL	5.11	73	22.4	No	No	daily	< 7hrs	No	no	NONVEGETARIAN	urban	SINGLE	96.82	POSITIVE	10.71	POSITIVE	#N/A	#N/A	#N/A	#N/A
21	MOUNIKA	Female	27	MSc	B GROUP	Rh+VE	Laboratory Technician	Yes	COVISHEILD	85	Headache	No	NA	Yes	NILL	5.3	40	15.6	No	No	NONE	> 8hrs	No	no	NONVEGETARIAN	urban	NUCLAR	96.34	POSITIVE	2.04	POSITIVE	#N/A	#N/A	#N/A	#N/A
22	PADMALATHA	Female	41	RESEARCH SCIENTIST MEDICAL	B GROUP	Rh+VE	Doctor/Clinician	Yes	COVISHEILD	58	Myalgia	No	NA	Yes	NILL	5.4	58	21.9	No	No	NONE	< 7hrs	No	no	NONVEGETARIAN	urban	NUCLAR	97.93	POSITIVE	3.79	POSITIVE	#N/A	#N/A	#N/A	#N/A
23	USHA	Female	49	MD	B GROUP	Rh+VE	Doctor/Clinician	Yes	COVISHEILD	48	Myalgia	Yes	Moderate	Yes	NILL	5.3	62	24.2	No	No	NONE	> 8hrs	No	no	VEGETARIAN	urban	NUCLAR	68.74	POSITIVE	0.42	NEGATIVE	96.6045	POSITIVE	47.7327	POSITIVE
24	DR KALAWATH	Male	55	HOD N MEDICINE	B GROUP	Rh+VE	Doctor/Clinician	Yes	COVISHEILD	28	None	No	NA	No	NILL	5.11	75	23.1	No	No	NONE	7-8hrs	No	no	NONVEGETARIAN	urban	NUCLAR	51.65	POSITIVE	0.63	NEGATIVE	95.2861	POSITIVE	36.3986	POSITIVE
25	SANTHI	Female	24	Lab Technician	O GROUP	Rh+VE	Laboratory Technician	Yes	COVISHEILD	24	Headache,Fever,Irritability	No	NA	Yes	NILL	5.2	62	25	No	No	NONE	> 8hrs	No	no	NONVEGETARIAN	rural	SINGLE	97.06	POSITIVE	2.98	POSITIVE	#N/A	#N/A	#N/A	#N/A
26	MADHAVI LATHA	Female	43	LAB TECHNICIAN	B GROUP	Rh+VE	Laboratory Technician	Yes	COVISHEILD	28	None	No	NA	Yes	NILL	5.4	65	24.6	No	No	weekly	< 7hrs	Yes	no	NONVEGETARIAN	urban	NUCLAR	73.75	POSITIVE	1.38	NEGATIVE	96.4552	POSITIVE	47.7327	POSITIVE
27	LAVAYNA	Female	24	DEO	B GROUP	Rh+VE	Svims Administrative Staff	Yes	COVISHEILD	28	Irritability	No	NA	No	NILL	5.6	63	22.4	No	No	NONE	< 7hrs	No	no	NONVEGETARIAN	urban	NUCLAR	85.75	POSITIVE	1.68	NEGATIVE	#N/A	#N/A	#N/A	#N/A
28	GEETHA MADHURI	Female	29	DEO	B GROUP	Rh+VE	Svims Administrative Staff	Yes	COVISHEILD	NA	Fever	Yes	Moderate	No	NILL	5.1	66	27.5	No	No	weekly	7-8hrs	No	no	NONVEGETARIAN	rural	NUCLAR	98.19	POSITIVE	8.87	POSITIVE	#N/A	#N/A	#N/A	#N/A
29	JANARDHAN	Male	26	LAB TECHNICIAN	B GROUP	Rh+VE	Laboratory Technician	Yes	COVISHEILD	NA	Fever	Yes	Moderate	Yes	NILL	5	57	24.7	No	No	NONE	7-8hrs	No	no	NONVEGETARIAN	rural	NUCLAR	97.39	POSITIVE	4.5	POSITIVE	98.6194	POSITIVE	43.0107	POSITIVE
30	PRASAD	Male	23	LAB TECHNICIAN	A GROUP	Rh+VE	Laboratory Technician	Yes	COVISHEILD	35	None	No	NA	Yes	NILL	5.6	67	23.8	No	Yes	weekly	7-8hrs	No	no	NONVEGETARIAN	rural	SINGLE	96.12	POSITIVE	1.99	NEGATIVE	#N/A	#N/A	#N/A	#N/A
31	SHIVA SANKAR	Male	25	LAB TECHNICIAN	O GROUP	Rh+VE	Laboratory Technician	Yes	COVISHEILD	30	Fever,Headache,Myalgia	Yes	Mild	Yes	NILL	5.5	68	24.9	No	Yes	daily	< 7hrs	No	yes	NONVEGETARIAN	urban	NUCLAR	96.93	POSITIVE	4.24	POSITIVE	94.291	POSITIVE	23.0692	POSITIVE
32	KEDHARNATH	Male	24	LAB TECHNICIAN	UNKNOWN	UNKNOWN	Laboratory Technician	Yes	COVISHEILD	NA	Fever,Headache,Myalgia	Yes	Mild	Yes	NILL	5.1	80	33.3	No	No	weekly	< 7hrs	No	no	NONVEGETARIAN	urban	SINGLE	98.12	POSITIVE	6.32	POSITIVE	#N/A	#N/A	#N/A	#N/A
33	JAMEER AHAMMAD	Male	30	RESEARCH SCIENTIST	A GROUP	Rh+VE	Doctor/Clinician	Yes	COVISHEILD	60	Fever	Yes	Mild	Yes	NILL	5.5	73	26.8	No	No	NONE	7-8hrs	No	no	NONVEGETARIAN	urban	NUCLAR	93.25	POSITIVE	1.86	NEGATIVE	95.02	POSITIVE	38.25	POSITIVE
34	SUPRIYA	Female	24	LAB TECHNICIAN	O GROUP	Rh+VE	Laboratory Technician	Yes	COVISHEILD	NA	Fever,Headache,Myalgia	Yes	Mild	Yes	NILL	5.2	54	21.8	No	No	weekly	7-8hrs	No	no	NONVEGETARIAN	urban	SINGLE	62.26	POSITIVE	1.16	NEGATIVE	97.12	POSITIVE	43.25	POSITIVE
35	Anju	Female	51	MD	A GROUP	Rh+VE	Doctor/Clinician	Yes	COVISHEILD	31	None	No	NA	Yes	NILL	5	62	26.7	No	No	daily	7-8hrs	No	no	VEGETARIAN	urban	NUCLAR	97.67	POSITIVE	4.29	POSITIVE	94.6393	POSITIVE	33.3628	POSITIVE
36	Pranuthi Roy	Female	26	MSc	B GROUP	Rh+VE	OTHERS	Yes	Covaxin	30	Myalgia	Yes	Mild	Yes	NILL	5.2	75	30.2	No	No	NONE	< 7hrs	No	no	NONVEGETARIAN	urban	NUCLAR	94.95	POSITIVE	4.31	POSITIVE	#N/A	#N/A	#N/A	#N/A
37	NEELIMA	Female	33	MSc	A GROUP	Rh+VE	Laboratory Technician	No	not vaccinated	na	None	Yes	Severe	Yes	WEAKNESS	5.3	60	23.4	No	No	daily	< 7hrs	Yes	no	NONVEGETARIAN	urban	NUCLAR	77.69	POSITIVE	2.62	POSITIVE	96.24	POSITIVE	41.98	POSITIVE
38	SIREESHA	Female	22	DEO	AB GROUP	Rh+VE	Svims Administrative Staff	Yes	COVISHEILD	32	Headache,Irritability,Myalgia	No	NA	No	NILL	5.4	42	15.9	No	No	NONE	> 8hrs	No	no	NONVEGETARIAN	urban	NUCLAR	97.71	POSITIVE	5.69	POSITIVE	#N/A	#N/A	#N/A	#N/A
39	SHARADHA	Female	29	WORKER	UNKNOWN	UNKNOWN	OTHERS	Yes	COVISHEILD	84	Fever,Headache,Irritability	No	NA	Yes	NILL	5.6	62	22.1	No	No	NONE	7-8hrs	No	no	NONVEGETARIAN	urban	NUCLAR	68.93	POSITIVE	1.14	NEGATIVE	96.5423	POSITIVE	13.6671	POSITIVE
40	PRASANTH	Male	27	INTER	UNKNOWN	UNKNOWN	OTHERS	Yes	COVISHEILD	78	Myalgia	No	NA	Yes	WEAKNESS	5.5	50	18.3	No	Yes	daily	> 8hrs	No	no	NONVEGETARIAN	urban	NUCLAR	97.91	POSITIVE	6.68	POSITIVE	61.2687	POSITIVE	37.8759	POSITIVE
41	NAVEEN	Male	22	BSc mlt	AB GROUP	Rh+VE	Laboratory Technician	Yes	COVISHEILD	47	Fever,Myalgia	Yes	Moderate	Yes	NILL	5.5	55	20.2	No	Yes	daily	> 8hrs	No	no	NONVEGETARIAN	urban	SINGLE	76.51	POSITIVE	1.36	NEGATIVE	85.34	POSITIVE	40.25	POSITIVE
42	SUNIL	Male	24	MSc	AB GROUP	Rh+VE	Laboratory Technician	Yes	COVISHEILD	46	Headache,Myalgia	No	NA	Yes	NILL	5.7	60	20.7	No	No	NONE	> 8hrs	No	no	NONVEGETARIAN	urban	NUCLAR	97.59	POSITIVE	3.45	POSITIVE	79.9378	POSITIVE	24.9165	POSITIVE
43	KIRANMAYEE	Female	24	BSc mlt	A GROUP	Rh+VE	Laboratory Technician	No	not vaccinated	na	None	Yes	Severe	Yes	NILL	5.2	40	16.1	No	No	NONE	> 8hrs	No	no	NONVEGETARIAN	urban	NUCLAR	86.05	POSITIVE	2.77	POSITIVE	98.98	POSITIVE	32.23	POSITIVE
44	VENKAT SUBBAIAH	Male	23	BSc mlt	B GROUP	Rh+VE	Laboratory Technician	Yes	COVISHEILD	48	None	Yes	Asymptomatic	Yes	NILL	5.5	68	24.9	No	No	daily	> 8hrs	No	no	NONVEGETARIAN	urban	NUCLAR	98.11	POSITIVE	3.9	POSITIVE	#N/A	#N/A	#N/A	#N/A
45	VINOD	Male	29	BSc mlt	B GROUP	Rh+VE	Laboratory Technician	Yes	COVISHEILD	84	None	Yes	Moderate	Yes	NILL	5.12	96	28.7	No	Yes	weekly	7-8hrs	No	no	NONVEGETARIAN	urban	NUCLAR	98.04	POSITIVE	8.27	POSITIVE	#N/A	#N/A	#N/A	#N/A
46	SRINIVASULU	Male	43	MSc PHD	B GROUP	Rh-VE	OTHERS	Yes	COVISHEILD	84	None	Yes	Mild	Yes	NILL	5.7	70	24.2	No	No	daily	< 7hrs	No	yes	NONVEGETARIAN	urban	NUCLAR	97.95	POSITIVE	4.75	POSITIVE	#N/A	#N/A	#N/A	#N/A
47	RAMESWAR	Male	24	LAB TECHNICIAN	O GROUP	Rh+VE	Laboratory Technician	Yes	COVISHEILD	30	Fever,Headache,Irritability	No	NA	Yes	NILL	5.6	50	17.8	No	No	NONE	7-8hrs	No	no	NONVEGETARIAN	urban	NUCLAR	96	POSITIVE	1.39	NEGATIVE	#N/A	#N/A	#N/A	#N/A
48	BALAPPA	Male	36	JUNIOR ASSISTANT	O GROUP	Rh+VE	OTHERS	Yes	COVISHEILD	60	None	No	NA	No	NILL	5.5	60	22	No	No	NONE	> 8hrs	No	no	NONVEGETARIAN	urban	NUCLAR	98.02	POSITIVE	5.57	POSITIVE	74.9502	POSITIVE	26.1909	POSITIVE
49	SREENIVASULU	Male	48	SUPERIDENT	AB GROUP	Rh+VE	Svims Administrative Staff	Yes	COVISHEILD	31	Fever	No	NA	No	NILL	5.8	70	23.5	No	No	daily	7-8hrs	No	no	NONVEGETARIAN	urban	NUCLAR	81.69	POSITIVE	0.72	NEGATIVE	80.2363	POSITIVE	12.1635	POSITIVE
50	REDDEPPA	Male	48	SECURITY GAURD	B GROUP	Rh+VE	OTHERS	Yes	COVISHEILD	29	Fever,Irritability,Headache	No	NA	Yes	NILL	5.6	90	32	No	Yes	weekly	> 8hrs	No	no	NONVEGETARIAN	urban	NUCLAR	88.64	POSITIVE	1.74	NEGATIVE	#N/A	#N/A	#N/A	#N/A
51	ARUNAMMA	Female	49	PA	UNKNOWN	UNKNOWN	Svims Administrative Staff	Yes	COVISHEILD	64	Fever,Irritability,Headache	No	NA	No	NILL	4.9	63	30.1	No	No	daily	< 7hrs	No	no	NONVEGETARIAN	urban	NUCLAR	98.46	POSITIVE	6.56	POSITIVE	95.8333	POSITIVE	29.9773	POSITIVE
52	RAMYA	Female	33	PA	O GROUP	Rh+VE	Svims Administrative Staff	Yes	COVISHEILD	35	None	No	NA	Yes	WEAKNESS	5.1	51	22.2	No	No	daily	7-8hrs	No	no	NONVEGETARIAN	urban	NUCLAR	97.8	POSITIVE	5.63	POSITIVE	95.1493	POSITIVE	42.7816	POSITIVE
53	JYOSHNA DEVI	Female	28	LAB TECHNICIAN	UNKNOWN	UNKNOWN	Laboratory Technician	Yes	COVISHEILD	80	Headache,Fever	Yes	Mild	Yes	NILL	5.1	63	26.2	No	No	NONE	7-8hrs	Yes	no	NONVEGETARIAN	urban	NUCLAR	97.02	POSITIVE	6.54	POSITIVE	#N/A	#N/A	#N/A	#N/A
54	SRAVAN	Male	26	CLINICAL PHARMACIST	A GROUP	Rh+VE	Doctor/Clinician	Yes	COVISHEILD	83	None	Yes	Moderate	Yes	NILL	5.6	72	25.6	No	No	daily	7-8hrs	No	no	NONVEGETARIAN	urban	NUCLAR	98.36	POSITIVE	5.95	POSITIVE	99.21	POSITIVE	41.58	POSITIVE
55	SAI KIRAN	Male	25	CLINICAL PHARMACIST	B GROUP	Rh+VE	Doctor/Clinician	Yes	COVISHEILD	48	Fever,Myalgia	No	NA	Yes	NILL	5.7	82	28.7	No	No	daily	7-8hrs	No	no	NONVEGETARIAN	urban	NUCLAR	98.26	POSITIVE	3.25	POSITIVE	#N/A	#N/A	#N/A	#N/A
56	RADHA	Female	49	PA	AB GROUP	Rh+VE	Svims Administrative Staff	Yes	COVISHEILD	45	None	No	NA	Yes	NILL	5.3	74	28.9	No	No	weekly	< 7hrs	No	no	NONVEGETARIAN	urban	NUCLAR	97.84	POSITIVE	4.95	POSITIVE	#N/A	#N/A	#N/A	#N/A
57	ANUHYA	Female	24	CLINICAL PHARMACIST	O GROUP	Rh+VE	Doctor/Clinician	Yes	Covaxin	45	None	No	NA	No	NILL	5.6	55	19.6	No	No	NONE	7-8hrs	No	no	NONVEGETARIAN	urban	NUCLAR	96.08	POSITIVE	7.23	POSITIVE	#N/A	#N/A	#N/A	#N/A
58	VISWESWAR RAO	Male	34	ASSISTANT PROFESSOR	O GROUP	Rh+VE	Doctor/Clinician	Yes	COVISHEILD	28	None	No	NA	Yes	NILL	5.11	82	25.2	No	No	daily	< 7hrs	No	no	NONVEGETARIAN	urban	NUCLAR	66.51	POSITIVE	1.88	NEGATIVE	#N/A	#N/A	#N/A	#N/A
59	PRANAYA THEJA	Male	32	NETWORK ENGINEER	A GROUP	Rh+VE	Svims Administrative Staff	Yes	COVISHEILD	28	None	No	NA	Yes	NILL	5.11	70	21.5	No	No	weekly	< 7hrs	No	no	NONVEGETARIAN	urban	NUCLAR	98.43	POSITIVE	5.88	POSITIVE	92.6617	POSITIVE	38.6432	POSITIVE
60	SUJITH KUMAR	Male	43	ASSOCIATE PROFESSOR	A GROUP	Rh+VE	Doctor/Clinician	Yes	COVISHEILD	60	None	No	NA	No	NILL	5.7	87	30	No	Yes	daily	7-8hrs	No	no	NONVEGETARIAN	urban	NUCLAR	92.2	POSITIVE	1.82	NEGATIVE	#N/A	#N/A	#N/A	#N/A
61	RAVI SANKAR	Male	39	ASSOCIATE PROFESSOR	O GROUP	Rh+VE	Doctor/Clinician	Yes	COVISHEILD	64	Irritability	Yes	Mild	Yes	NILL	5.4	65	24.6	No	No	daily	< 7hrs	No	no	NONVEGETARIAN	urban	NUCLAR	97.74	POSITIVE	3.17	POSITIVE	#N/A	#N/A	#N/A	#N/A
62	SUBASH	Male	44	PROFESSOR	B GROUP	Rh+VE	Doctor/Clinician	Yes	COVISHEILD	29	Myalgia	No	NA	Yes	NILL	5.8	86	28.8	No	No	daily	7-8hrs	No	no	NONVEGETARIAN	urban	NUCLAR	70.48	POSITIVE	1.03	NEGATIVE	#N/A	#N/A	#N/A	#N/A
63	SATEESH	Male	55	ASSISTANT DIRECTOR	O GROUP	Rh+VE	Doctor/Clinician	Yes	COVISHEILD	84	None	No	NA	Yes	NILL	5.7	73	25.2	No	No	daily	7-8hrs	No	no	NONVEGETARIAN	urban	NUCLAR	96.28	POSITIVE	3.38	POSITIVE	#N/A	#N/A	#N/A	#N/A
64	ARUNA	Female	50	SUPERIDENT	AB GROUP	Rh-VE	Svims Administrative Staff	Yes	COVISHEILD	28	Irritability	Yes	Mild	Yes	NILL	5.3	76	29.7	No	No	daily	> 8hrs	No	no	NONVEGETARIAN	urban	NUCLAR	96.02	POSITIVE	3.89	POSITIVE	98.3253	POSITIVE	28.7587	POSITIVE
65	MANJULA	Female	50	AD	A GROUP	Rh-VE	Svims Administrative Staff	Yes	COVISHEILD	29	Irritability	Yes	Moderate	No	NILL	5.4	73	27.6	No	No	NONE	< 7hrs	No	no	VEGETARIAN	urban	NUCLAR	97.89	POSITIVE	5.14	POSITIVE	#N/A	#N/A	#N/A	#N/A
66	NAGA PRASUNA	Female	51	SUPERIDENT	O GROUP	Rh+VE	Svims Administrative Staff	Yes	COVISHEILD	28	None	No	NA	No	NILL	5.1	83	34.6	No	No	daily	> 8hrs	No	no	VEGETARIAN	urban	NUCLAR	62.46	POSITIVE	0.44	NEGATIVE	86.7662	POSITIVE	31.9463	POSITIVE
67	REDDIESWARI	Female	47	PHARMACIST	B GROUP	Rh+VE	Doctor/Clinician	Yes	COVISHEILD	84	Fever	No	NA	Yes	NILL	5.2	68	27.4	No	No	daily	7-8hrs	No	no	NONVEGETARIAN	urban	NUCLAR	93.36	POSITIVE	1.92	NEGATIVE	#N/A	#N/A	#N/A	#N/A
68	CHAITANYA PRASAD	Male	26	PHARMACIST	O GROUP	Rh+VE	Doctor/Clinician	Yes	COVISHEILD	83	Irritability	Yes	Mild	Yes	NILL	5.8	78	26.1	No	No	daily	7-8hrs	No	no	NONVEGETARIAN	urban	SINGLE	79.92	POSITIVE	3.08	POSITIVE	#N/A	#N/A	#N/A	#N/A
69	REDDY HARI PRASAD	Male	42	PHARMACIST	B GROUP	Rh-VE	Doctor/Clinician	Yes	COVISHEILD	34	None	Yes	Mild	Yes	NILL	5.4	85	32.2	No	No	weekly	< 7hrs	No	no	NONVEGETARIAN	urban	NUCLAR	97.99	POSITIVE	4.68	POSITIVE	#N/A	#N/A	#N/A	#N/A
70	MADHUSUDAN	Male	44	PA	B GROUP	Rh+VE	Svims Administrative Staff	Yes	COVISHEILD	80	None	No	NA	No	NILL	5.11	78	24	No	No	weekly	7-8hrs	No	no	NONVEGETARIAN	urban	NUCLAR	97.77	POSITIVE	4.81	POSITIVE	#N/A	#N/A	#N/A	#N/A
71	NAGARAJ	Male	58	PROFESSOR	O GROUP	Rh+VE	Doctor/Clinician	Yes	COVISHEILD	28	Myalgia	Yes	Mild	No	NILL	5.1	75	31.2	No	No	weekly	7-8hrs	No	no	VEGETARIAN	urban	NUCLAR	98.1	POSITIVE	6.06	POSITIVE	#N/A	#N/A	#N/A	#N/A
72	SANTHANA LAKSHMI	Female	54	SUPERIDENT	UNKNOWN	UNKNOWN	Svims Administrative Staff	Yes	COVISHEILD	30	Irritability	No	NA	Yes	NILL	5.4	75	28.4	No	No	daily	> 8hrs	No	no	NONVEGETARIAN	urban	NUCLAR	79.98	POSITIVE	1.35	NEGATIVE	#N/A	#N/A	#N/A	#N/A
73	RAJINI	Female	47	SUPERIDENT	B GROUP	Rh+VE	Svims Administrative Staff	Yes	COVISHEILD	64	None	No	NA	No	NILL	5.5	80	29.3	No	No	daily	7-8hrs	No	no	NONVEGETARIAN	urban	NUCLAR	97.79	POSITIVE	4.12	POSITIVE	98.1095	POSITIVE	35.2959	POSITIVE
74	VENKATA RAMANA REDDY	Male	53	SUPERIDENT	B GROUP	Rh+VE	Svims Administrative Staff	Yes	COVISHEILD	31	Fever,Myalgia	Yes	Mild	No	NILL	5.11	76	23.4	No	Yes	daily	< 7hrs	No	no	NONVEGETARIAN	urban	NUCLAR	98.23	POSITIVE	4.47	POSITIVE	98.4526	POSITIVE	35.0048	POSITIVE
75	SASIKALA	Female	54	ASSISTANT DIRECTOR	B GROUP	Rh+VE	Svims Administrative Staff	Yes	COVISHEILD	28	Irritability	No	NA	No	NILL	5.4	79	29.9	No	No	NONE	< 7hrs	No	no	VEGETARIAN	urban	NUCLAR	75.05	POSITIVE	1.05	NEGATIVE	97.8503	POSITIVE	17.117	POSITIVE
76	PRASANNA LAKSHMI	Female	51	DEPUTY DIRECTOR	O GROUP	Rh+VE	Doctor/Clinician	Yes	COVISHEILD	62	Myalgia,Irritability	No	NA	Yes	NILL	5.4	77	29.1	No	No	daily	7-8hrs	No	no	NONVEGETARIAN	urban	NUCLAR	81.95	POSITIVE	0.87	NEGATIVE	#N/A	#N/A	#N/A	#N/A
77	PRABHAVATHI	Female	56	AD NURSING	A GROUP	Rh+VE	Nurse	Yes	COVISHEILD	54	None	No	NA	Yes	NILL	5.6	80	28.5	No	No	daily	< 7hrs	No	no	NONVEGETARIAN	urban	NUCLAR	98.5	POSITIVE	6.63	POSITIVE	#N/A	#N/A	#N/A	#N/A
78	RADHA	Female	38	PA	B GROUP	Rh+VE	Svims Administrative Staff	Yes	COVISHEILD	30	Irritability,Myalgia	Yes	Asymptomatic	No	NILL	5.6	64	22.8	No	No	NONE	7-8hrs	No	no	NONVEGETARIAN	urban	NUCLAR	97.97	POSITIVE	3.46	POSITIVE	#N/A	#N/A	#N/A	#N/A
79	ANNAPURNA	Female	39	PA	O GROUP	Rh+VE	Svims Administrative Staff	Yes	COVISHEILD	62	Fever	No	NA	No	NILL	5.4	86	32.5	No	No	daily	> 8hrs	No	no	NONVEGETARIAN	urban	NUCLAR	98.15	POSITIVE	5.84	POSITIVE	#N/A	#N/A	#N/A	#N/A
80	MADHAVI	Female	51	SUPERIDENT	O GROUP	Rh+VE	Svims Administrative Staff	Yes	COVISHEILD	30	Myalgia,Headache,Irritability,Fever	No	NA	No	NILL	5.6	66	23.5	No	No	daily	7-8hrs	Yes	no	NONVEGETARIAN	urban	NUCLAR	82.12	POSITIVE	0.89	NEGATIVE	98.482	POSITIVE	17.0627	POSITIVE
81	bhagyasree	Female	50	ast dirocter	B GROUP	Rh+VE	Svims Administrative Staff	Yes	COVISHEILD	35	Fever,Headache	No	NA	Yes	NILL	5.2	65	26.2	No	No	NONE	7-8hrs	Yes	no	NONVEGETARIAN	urban	NUCLAR	71.08	POSITIVE	0.38	NEGATIVE	#N/A	#N/A	#N/A	#N/A
82	Madhusehkarreddy	Male	38	PA	O GROUP	Rh+VE	Svims Administrative Staff	Yes	COVISHEILD	84	None	No	NA	Yes	NILL	5.6	69	24.6	No	No	daily	< 7hrs	No	no	NONVEGETARIAN	urban	NUCLAR	98.23	POSITIVE	6.72	POSITIVE	#N/A	#N/A	#N/A	#N/A
83	Madhubabu	Male	41	attender	O GROUP	Rh+VE	Svims Administrative Staff	Yes	COVISHEILD	35	Headache	No	NA	Yes	NILL	5.1	70	29.2	No	No	NONE	7-8hrs	No	no	NONVEGETARIAN	urban	NUCLAR	97.22	POSITIVE	3.03	POSITIVE	#N/A	#N/A	#N/A	#N/A
84	RAmesh	Male	27	PA	B GROUP	Rh+VE	Svims Administrative Staff	Yes	COVISHEILD	45	Irritability	Yes	Severe	Yes	NILL	5.1	74	30.8	No	Yes	daily	7-8hrs	No	no	NONVEGETARIAN	urban	SINGLE	97.92	POSITIVE	3.96	POSITIVE	#N/A	#N/A	#N/A	#N/A
85	hemanthkumar	Male	30	PA	O GROUP	Rh+VE	Svims Administrative Staff	Yes	COVISHEILD	NA	Fever,Headache,Myalgia	No	NA	No	NILL	5.1	65	28.3	No	Yes	weekly	7-8hrs	Yes	yes	NONVEGETARIAN	urban	NUCLAR	97.46	POSITIVE	2.91	POSITIVE	#N/A	#N/A	#N/A	#N/A
86	PRASAD	Male	33	PA	O GROUP	Rh+VE	Svims Administrative Staff	Yes	COVISHEILD	30	Myalgia,Fever,Headache	No	NA	No	NILL	5.6	78	27.8	No	No	NONE	7-8hrs	Yes	yes	NONVEGETARIAN	urban	NUCLAR	78.79	POSITIVE	0.74	NEGATIVE	#N/A	#N/A	#N/A	#N/A
87	SUJATHA	Female	43	PA	O GROUP	Rh+VE	OTHERS	Yes	COVISHEILD	60	Myalgia,Fever,Headache	No	NA	No	NILL	5.6	83	29.5	No	No	NONE	< 7hrs	No	no	NONVEGETARIAN	urban	NUCLAR	97.18	POSITIVE	3.6	POSITIVE	#N/A	#N/A	#N/A	#N/A
88	ROJARAMANI	Female	41	PA	O GROUP	Rh+VE	OTHERS	Yes	COVISHEILD	25	Fever	No	NA	No	NILL	5.6	80	28.5	No	No	daily	7-8hrs	Yes	yes	NONVEGETARIAN	urban	NUCLAR	97.74	POSITIVE	9.45	POSITIVE	#N/A	#N/A	#N/A	#N/A
89	PUNNITEJA	Male	26	WORKER	UNKNOWN	UNKNOWN	OTHERS	Yes	COVISHEILD	21	Headache,Fever	Yes	Severe	Yes	NILL	6	55	16.4	No	No	daily	< 7hrs	No	no	NONVEGETARIAN	urban	NUCLAR	97.34	POSITIVE	7.4	POSITIVE	#N/A	#N/A	#N/A	#N/A
90	ANANDAREDDY	Male	45	LT	O GROUP	Rh+VE	Laboratory Technician	Yes	COVISHEILD	NA	Fever,Myalgia	No	NA	No	NILL	5.8	75	25.1	No	No	NONE	7-8hrs	No	no	NONVEGETARIAN	urban	NUCLAR	82.65	POSITIVE	2.3	POSITIVE	#N/A	#N/A	#N/A	#N/A
91	NAGENDRA	Male	39	LT	B GROUP	Rh+VE	Laboratory Technician	Yes	Covaxin	23	None	No	NA	No	NILL	5.1	86	35.8	No	Yes	NONE	< 7hrs	Yes	yes	NONVEGETARIAN	urban	NUCLAR	66.47	POSITIVE	1.75	NEGATIVE	#N/A	#N/A	#N/A	#N/A
92	RAMASUBBARAMUDU	Male	45	SUPERNET	B GROUP	Rh+VE	Svims Administrative Staff	Yes	COVISHEILD	30	None	No	NA	No	NILL	5.6	74	26.3	No	No	daily	7-8hrs	No	no	NONVEGETARIAN	urban	NUCLAR	97.17	POSITIVE	7.97	POSITIVE	#N/A	#N/A	#N/A	#N/A
93	LALITHAKUMARI	Female	34	PA	O GROUP	Rh-VE	OTHERS	Yes	COVISHEILD	60	Myalgia	No	NA	No	NILL	5	44	18.9	No	No	NONE	< 7hrs	No	no	NONVEGETARIAN	urban	NUCLAR	80.94	POSITIVE	1.42	NEGATIVE	#N/A	#N/A	#N/A	#N/A
94	anniebesant	Female	53	HEAD NURSE	O GROUP	Rh+VE	Nurse	Yes	COVISHEILD	60	Fever,Myalgia	No	NA	No	NILL	5	73	31.4	No	No	NONE	< 7hrs	No	yes	NONVEGETARIAN	urban	NUCLAR	99.35	POSITIVE	9.19	POSITIVE	#N/A	#N/A	#N/A	#N/A
95	GANESH	Male	32	STAFF NURSE	A GROUP	Rh+VE	Nurse	Yes	COVISHEILD	60	Fever,Headache,Myalgia	Yes	Mild	Yes	NILL	6	62	18.5	No	No	weekly	7-8hrs	No	no	NONVEGETARIAN	urban	NUCLAR	99.68	POSITIVE	13.55	POSITIVE	90.1244	POSITIVE	23.8747	POSITIVE
96	SUDHAKAR	Male	40	CA	B GROUP	Rh+VE	OTHERS	Yes	COVISHEILD	40	Myalgia,Headache	No	NA	No	NILL	5.1	74	30.8	No	Yes	weekly	7-8hrs	No	no	NONVEGETARIAN	urban	NUCLAR	99.5	POSITIVE	6.48	POSITIVE	89.2164	POSITIVE	19.6981	POSITIVE
97	GURAVAIAH	Male	30	PA	B GROUP	Rh+VE	Svims Administrative Staff	Yes	COVISHEILD	36	None	No	NA	NO	NILL	5.1	70	29.2	No	No	daily	7-8hrs	No	no	NONVEGETARIAN	urban	NUCLAR	99.58	POSITIVE	6.31	POSITIVE	#N/A	#N/A	#N/A	#N/A
98	LAKSHMIKAMESWERI	Female	58	FM	B GROUP	Rh+VE	OTHERS	Yes	COVISHEILD	30	None	No	NA	No	NILL	5	60	25.8	No	No	NONE	< 7hrs	Yes	yes	VEGETARIAN	urban	NUCLAR	99.68	POSITIVE	11.07	POSITIVE	#N/A	#N/A	#N/A	#N/A
99	NIRANJAN	Male	27	COMPUTER ASSISTANT	B GROUP	Rh+VE	OTHERS	Yes	COVISHEILD	30	Fever,Myalgia	No	NA	No	NILL	5.8	70	23.5	No	Yes	NONE	7-8hrs	Yes	yes	NONVEGETARIAN	urban	SINGLE	99.02	POSITIVE	9.31	POSITIVE	#N/A	#N/A	#N/A	#N/A
100	SAIKISHORE	Male	34	C A	B GROUP	Rh+VE	OTHERS	Yes	COVISHEILD	40	Headache	Yes	Mild	Yes	NILL	5	81	34.9	No	No	weekly	< 7hrs	No	no	NONVEGETARIAN	urban	NUCLAR	99.38	POSITIVE	5.16	POSITIVE	#N/A	#N/A	#N/A	#N/A
101	LAKSHMI TRIVENI	Female	39	SENIOR ASSISTANT	B GROUP	Rh+VE	Svims Administrative Staff	Yes	COVISHEILD	52	Headache,Myalgia,Fever	No	NA	No	NILL	5.2	66	26.6	No	No	daily	7-8hrs	No	no	NONVEGETARIAN	urban	NUCLAR	98.32	POSITIVE	7.11	POSITIVE	98.1098	POSITIVE	46.0072	POSITIVE
102	SUJATHA	Female	38	PA	UNKNOWN	UNKNOWN	Svims Administrative Staff	Yes	COVISHEILD	30	Myalgia,Fever,Headache,Irritability	No	NA	No	NILL	5.3	58	22.7	No	No	daily	< 7hrs	Yes	yes	NONVEGETARIAN	urban	NUCLAR	99.59	POSITIVE	6.04	POSITIVE	98.5652	POSITIVE	21.4246	POSITIVE
103	SANDEEP	Male	40	LAB TECHNICIAN	B GROUP	Rh+VE	Laboratory Technician	Yes	COVISHEILD	60	None	No	NA	Yes	NILL	5.8	74	24.8	No	No	daily	7-8hrs	Yes	no	NONVEGETARIAN	urban	NUCLAR	93.13	POSITIVE	3.17	POSITIVE	#N/A	#N/A	#N/A	#N/A
104	RAMANJANEYULU	Male	27	LAB TECHNICIAN	O GROUP	Rh+VE	Laboratory Technician	Yes	COVISHEILD	30	None	No	NA	Yes	NILL	5.2	65	26.2	Yes	Yes	NONE	7-8hrs	Yes	no	NONVEGETARIAN	urban	SINGLE	99.66	POSITIVE	9.05	POSITIVE	98.296	POSITIVE	41.5239	POSITIVE
105	MURALI MOHAN REDDY	Male	40	PA	AB GROUP	Rh+VE	Svims Administrative Staff	Yes	COVISHEILD	42	None	No	NA	No	NILL	6	77	23	No	No	daily	7-8hrs	No	no	NONVEGETARIAN	urban	NUCLAR	99.45	POSITIVE	7.71	POSITIVE	98.9814	POSITIVE	48.2509	POSITIVE
106	SUMATHI	Female	30	LAB TECHNICIAN	O GROUP	Rh+VE	Laboratory Technician	Yes	COVISHEILD	28	None	No	NA	Yes	NILL	4.9	55	26.2	No	No	daily	< 7hrs	No	no	NONVEGETARIAN	urban	NUCLAR	88.72	POSITIVE	2.44	POSITIVE	#N/A	#N/A	#N/A	#N/A
107	YALLAPPA	Male	44	PA	O GROUP	Rh+VE	Svims Administrative Staff	Yes	COVISHEILD	28	None	No	NA	No	NILL	5.9	74	24.1	No	No	NONE	7-8hrs	No	no	NONVEGETARIAN	urban	NUCLAR	99.46	POSITIVE	8.71	POSITIVE	#N/A	#N/A	#N/A	#N/A
108	SRIDEVI	Female	25	LAB TECHNICIAN	A GROUP	Rh+VE	Laboratory Technician	Yes	Covaxin	30	Headache,Myalgia	No	NA	Yes	NILL	5.7	98	33.8	No	No	NONE	< 7hrs	Yes	yes	NONVEGETARIAN	urban	NUCLAR	80.61	POSITIVE	7.31	POSITIVE	92.7114	POSITIVE	47.7327	POSITIVE
109	BHUVANESWARI	Female	52	NURSING SUPERIDENT	B GROUP	Rh+VE	Nurse	Yes	Covaxin	28	None	Yes	Mild	Yes	NILL	5	60	25.8	No	No	NONE	< 7hrs	No	no	NONVEGETARIAN	urban	NUCLAR	58.04	POSITIVE	1.18	NEGATIVE	99.02	POSITIVE	41.01	POSITIVE
110	AKKAIAH	Male	43	PA	UNKNOWN	UNKNOWN	Svims Administrative Staff	Yes	COVISHEILD	28	None	No	NA	No	NILL	5.7	65	22.4	No	No	NONE	7-8hrs	No	no	NONVEGETARIAN	urban	NUCLAR	99.7	POSITIVE	10.71	POSITIVE	#N/A	#N/A	#N/A	#N/A
111	UMA LAKSHMI	Female	36	STAFF NURSE	O GROUP	Rh+VE	Nurse	Yes	COVISHEILD	54	Irritability	No	NA	Yes	NILL	5.4	49	18.5	No	No	NONE	7-8hrs	No	no	NONVEGETARIAN	urban	NUCLAR	98.91	POSITIVE	4.94	POSITIVE	#N/A	#N/A	#N/A	#N/A
112	KHADERVALI	Male	22	LAB TECHNICIAN	A GROUP	Rh-VE	Laboratory Technician	Yes	COVISHEILD	NA	Fever,Headache	Yes	Mild	Yes	NILL	5.8	70	23.5	No	No	weekly	7-8hrs	No	no	NONVEGETARIAN	urban	NUCLAR	99.04	POSITIVE	4.61	POSITIVE	96.1194	POSITIVE	27.6289	POSITIVE
113	SHANTHI	Female	38	STAFF	UNKNOWN	UNKNOWN	Multipurpose Worker	Yes	Covaxin	28	Fever,Headache	No	NA	No	NILL	5.3	70	27.3	No	No	NONE	> 8hrs	No	no	NONVEGETARIAN	urban	NUCLAR	71.7	POSITIVE	1.19	NEGATIVE	#N/A	#N/A	#N/A	#N/A
114	NAGARAJU	Male	31	F M	O GROUP	Rh+VE	OTHERS	Yes	COVISHEILD	30	None	Yes	Mild	Yes	NILL	5.1	82	34.2	No	No	NONE	7-8hrs	No	no	NONVEGETARIAN	urban	NUCLAR	99.5	POSITIVE	9.25	POSITIVE	#N/A	#N/A	#N/A	#N/A
115	MADHAVAN	Male	59	SWAMY	O GROUP	Rh+VE	OTHERS	Yes	COVISHEILD	55	None	No	NA	No	NILL	5.1	70	29.2	No	No	NONE	7-8hrs	No	no	VEGETARIAN	urban	NUCLAR	46.69	NEGATIVE	0.7	NEGATIVE	#N/A	#N/A	#N/A	#N/A
116	NIVEDHTHA	Female	29	F M	B GROUP	Rh+VE	OTHERS	Yes	Covaxin	62	None	No	NA	No	NILL	5.8	83	27.8	No	No	NONE	7-8hrs	No	no	NONVEGETARIAN	urban	NUCLAR	83.23	POSITIVE	1.48	NEGATIVE	#N/A	#N/A	#N/A	#N/A
117	CHANDRA BABU	Male	39	PHARMACIST	O GROUP	Rh+VE	Doctor/Clinician	Yes	COVISHEILD	30	Fever,Myalgia	No	NA	Yes	NILL	5.7	58	20	No	No	NONE	7-8hrs	No	no	VEGETARIAN	urban	NUCLAR	98.91	POSITIVE	5.27	POSITIVE	#N/A	#N/A	#N/A	#N/A
118	BHARATHAMMA	Female	45	PHARMACIST	B GROUP	Rh+VE	Doctor/Clinician	Yes	COVISHEILD	84	None	No	NA	Yes	NILL	5.4	58	21.9	No	No	daily	7-8hrs	No	no	NONVEGETARIAN	urban	NUCLAR	46.54	NEGATIVE	0.64	NEGATIVE	#N/A	#N/A	#N/A	#N/A
119	BALA RAMA REDDY	Male	41	PA	A GROUP	Rh+VE	Svims Administrative Staff	Yes	COVISHEILD	28	Fever	No	NA	No	NILL	5.2	70	28.2	No	No	weekly	> 8hrs	No	no	VEGETARIAN	urban	NUCLAR	91.62	POSITIVE	2.27	POSITIVE	#N/A	#N/A	#N/A	#N/A
120	GUNA SEKHAR	Male	35	PA	A GROUP	Rh+VE	Svims Administrative Staff	Yes	COVISHEILD	28	Fever,Myalgia	No	NA	No	NILL	4.8	56	27.7	No	No	NONE	> 8hrs	No	no	VEGETARIAN	urban	NUCLAR	99.36	POSITIVE	6.31	POSITIVE	#N/A	#N/A	#N/A	#N/A
121	ESAWARE	Female	38	WORKER	UNKNOWN	UNKNOWN	OTHERS	Yes	COVISHEILD	21	None	No	NA	No	NILL	5	60	25.8	No	No	NONE	< 7hrs	No	no	NONVEGETARIAN	urban	NUCLAR	99.61	POSITIVE	5.95	POSITIVE	#N/A	#N/A	#N/A	#N/A
122	JOYTHI	Female	55	ANM	B GROUP	Rh+VE	Nurse	Yes	COVISHEILD	70	Fever,Myalgia	Yes	Mild	Yes	NILL	5.8	80	26.8	No	No	NONE	< 7hrs	No	no	NONVEGETARIAN	urban	NUCLAR	99.58	POSITIVE	5.58	POSITIVE	#N/A	#N/A	#N/A	#N/A
123	SOWBHAGYA	Female	26	DEO	B GROUP	Rh+VE	OTHERS	Yes	COVISHEILD	21	Fever,Headache	No	NA	No	NILL	5	45	19.4	No	No	NONE	7-8hrs	Yes	yes	NONVEGETARIAN	urban	SINGLE	99.53	POSITIVE	6.6	POSITIVE	#N/A	#N/A	#N/A	#N/A
124	USHARANI	Female	43	STUDENT	AB GROUP	Rh+VE	OTHERS	Yes	COVISHEILD	30	Fever,Headache,Myalgia	No	NA	No	NILL	5.2	62	25	No	No	NONE	< 7hrs	No	no	NONVEGETARIAN	urban	NUCLAR	88.55	POSITIVE	1.49	NEGATIVE	#N/A	#N/A	#N/A	#N/A
125	BABU	Male	54	PA	B GROUP	Rh+VE	Svims Administrative Staff	Yes	COVISHEILD	36	Headache,Irritability	No	NA	No	NILL	5.6	84	29.2	No	No	NONE	< 7hrs	Yes	no	NONVEGETARIAN	urban	NUCLAR	99.7	POSITIVE	7.48	POSITIVE	#N/A	#N/A	#N/A	#N/A
126	CHANDRA BABU	Male	40	ATTENDER	B GROUP	Rh+VE	Multipurpose Worker	Yes	COVISHEILD	30	None	Yes	Mild	No	NILL	5.3	63	24.6	No	Yes	daily	> 8hrs	No	no	NONVEGETARIAN	urban	NUCLAR	99.43	POSITIVE	8.58	POSITIVE	#N/A	#N/A	#N/A	#N/A
127	VARSHA	Female	21	STUDENT	A GROUP	Rh+VE	OTHERS	Yes	COVISHEILD	40	Headache,Fever,Myalgia	No	NA	No	NILL	5.3	65	25.4	No	No	daily	7-8hrs	No	no	NONVEGETARIAN	urban	NUCLAR	98.43	POSITIVE	5	POSITIVE	#N/A	#N/A	#N/A	#N/A
128	SIVA	Male	29	WORKER	O GROUP	Rh+VE	Multipurpose Worker	Yes	COVISHEILD	84	Fever,Headache,Myalgia,Irritability	No	NA	Yes	NILL	5.6	63	22.4	Yes	Yes	daily	7-8hrs	Yes	no	NONVEGETARIAN	urban	NUCLAR	99.62	POSITIVE	5.92	POSITIVE	#N/A	#N/A	#N/A	#N/A
129	HYMAVATHI	Female	48	STAFF NURSE	A GROUP	Rh+VE	Nurse	Yes	COVISHEILD	84	None	Yes	Mild	Yes	NILL	5.2	61	24.6	No	No	daily	7-8hrs	Yes	no	VEGETARIAN	urban	NUCLAR	91.33	POSITIVE	3.52	POSITIVE	#N/A	#N/A	#N/A	#N/A
130	SWATHI	Female	34	PA	B GROUP	Rh+VE	Svims Administrative Staff	Yes	COVISHEILD	30	Fever	No	NA	No	NILL	5.6	84	29.9	No	No	NONE	7-8hrs	No	no	VEGETARIAN	urban	NUCLAR	88.56	POSITIVE	1.48	NEGATIVE	98.717	POSITIVE	28.1267	POSITIVE
131	HARI PRIYA	Female	34	PA	O GROUP	Rh+VE	Svims Administrative Staff	Yes	Covaxin	30	None	No	NA	No	NILL	5.5	65	23.8	No	No	NONE	7-8hrs	No	no	VEGETARIAN	urban	NUCLAR	74.93	POSITIVE	5.22	POSITIVE	#N/A	#N/A	#N/A	#N/A
132	SIREESHA	Female	45	MRO	A GROUP	Rh+VE	Svims Administrative Staff	Yes	COVISHEILD	38	Myalgia	No	NA	Yes	NILL	5.8	70	23.5	No	No	weekly	7-8hrs	Yes	no	NONVEGETARIAN	urban	NUCLAR	99.71	POSITIVE	7.33	POSITIVE	#N/A	#N/A	#N/A	#N/A
133	GIRI BABU	Male	49	AMRO	B GROUP	Rh-VE	Doctor/Clinician	Yes	Covaxin	28	None	Yes	Mild	Yes	NILL	5.3	60	23.4	No	No	daily	< 7hrs	No	no	VEGETARIAN	urban	NUCLAR	96.13	POSITIVE	4.76	POSITIVE	#N/A	#N/A	#N/A	#N/A
134	SANDEEP KUMAR	Male	49	AMRO	A GROUP	Rh+VE	Doctor/Clinician	Yes	COVISHEILD	30	Myalgia	No	NA	Yes	NILL	5.6	80	28.5	No	No	weekly	> 8hrs	No	no	NONVEGETARIAN	urban	NUCLAR	86.8	POSITIVE	1.47	NEGATIVE	#N/A	#N/A	#N/A	#N/A
135	RAJASEKHAR	Male	58	HOD OF CARDIOLOGY	B GROUP	Rh+VE	Doctor/Clinician	Yes	COVISHEILD	30	Fever,Myalgia	No	NA	Yes	NILL	5.4	65	24.6	No	No	daily	7-8hrs	No	no	VEGETARIAN	urban	NUCLAR	98.68	POSITIVE	2.24	POSITIVE	#N/A	#N/A	#N/A	#N/A
136	MURTHY ACHARI	Male	46	MRT	O GROUP	Rh+VE	Doctor/Clinician	Yes	COVISHEILD	84	Fever,Myalgia	No	NA	Yes	NILL	5.6	62	22.1	No	No	daily	7-8hrs	No	no	NONVEGETARIAN	urban	NUCLAR	81.63	POSITIVE	0.25	NEGATIVE	#N/A	#N/A	#N/A	#N/A
137	USHA SREE	Female	46	CARDIOVASCULAR TECHNOLOGY	AB GROUP	Rh+VE	Doctor/Clinician	Yes	Covaxin	40	Myalgia	Yes	Mild	Yes	NILL	5.7	65	22.4	No	No	daily	< 7hrs	Yes	no	NONVEGETARIAN	urban	NUCLAR	99.4	POSITIVE	9.27	POSITIVE	#N/A	#N/A	#N/A	#N/A
138	LOKESH BABU	Male	34	CARDIOVASCULAR TECHNOLOGY	B GROUP	Rh+VE	Doctor/Clinician	Yes	Covaxin	40	None	Yes	Asymptomatic	Yes	NILL	5.9	85	27.7	No	No	daily	7-8hrs	No	no	VEGETARIAN	urban	NUCLAR	99.28	POSITIVE	12.29	POSITIVE	#N/A	#N/A	#N/A	#N/A
139	SELVI	Female	51	HEAD NURSE	B GROUP	Rh+VE	Nurse	Yes	COVISHEILD	84	Fever,Myalgia	Yes	Moderate	Yes	NILL	5.5	63	23.1	No	No	NONE	< 7hrs	No	no	NONVEGETARIAN	urban	NUCLAR	99.67	POSITIVE	5.18	POSITIVE	#N/A	#N/A	#N/A	#N/A
140	AMUDHA VALLI	Female	33	CARDIOVASCULAR TECHNOLOGIST	O GROUP	Rh+VE	Laboratory Technician	Yes	Covaxin	84	Myalgia	Yes	Mild	Yes	NILL	4.8	42	20.8	No	No	NONE	> 8hrs	No	no	NONVEGETARIAN	urban	NUCLAR	99.44	POSITIVE	17.5	POSITIVE	#N/A	#N/A	#N/A	#N/A
141	HARISH	Male	36	SENIOR RESIDENT	B GROUP	Rh+VE	Doctor/Clinician	Yes	Covaxin	30	None	No	NA	Yes	NILL	6	90	25.5	No	No	daily	7-8hrs	No	no	NONVEGETARIAN	urban	NUCLAR	80.24	POSITIVE	1.23	NEGATIVE	#N/A	#N/A	#N/A	#N/A
142	VARUN MITRA	Male	31	SENIOR RESIDENT	O GROUP	Rh+VE	Doctor/Clinician	Yes	COVISHEILD	28	Fever,Myalgia	Yes	Moderate	Yes	NILL	5.3	66	25.8	No	Yes	weekly	< 7hrs	No	no	NONVEGETARIAN	urban	NUCLAR	99.55	POSITIVE	7.79	POSITIVE	#N/A	#N/A	#N/A	#N/A
143	KIRAN	Male	30	DOCTOR	B GROUP	Rh+VE	Doctor/Clinician	Yes	COVISHEILD	42	Fever,Myalgia	No	NA	No	NILL	5.8	57	19.1	No	Yes	weekly	< 7hrs	No	no	VEGETARIAN	urban	NUCLAR	88.98	POSITIVE	1.11	NEGATIVE	#N/A	#N/A	#N/A	#N/A
144	BALAJI	Male	26	STAFF NURSE	AB GROUP	Rh+VE	Nurse	Yes	COVISHEILD	30	Myalgia	No	NA	Yes	NILL	6	96	28.7	No	No	weekly	7-8hrs	No	no	NONVEGETARIAN	urban	NUCLAR	99.67	POSITIVE	5.07	POSITIVE	#N/A	#N/A	#N/A	#N/A
145	HEMANTH KUMAR	Male	25	CARDIOVASCULAR TECHNOLOGIST	B GROUP	Rh+VE	Laboratory Technician	Yes	COVISHEILD	30	Fever	No	NA	Yes	NILL	5.9	80	26	No	No	weekly	7-8hrs	No	no	NONVEGETARIAN	urban	NUCLAR	99.67	POSITIVE	5.04	POSITIVE	#N/A	#N/A	#N/A	#N/A
146	RAJA NAGA MAHESH	Male	31	ASP	AB GROUP	Rh+VE	Doctor/Clinician	Yes	COVISHEILD	30	None	Yes	Mild	Yes	NILL	5.1	75	31.2	No	No	daily	7-8hrs	No	no	NONVEGETARIAN	urban	SINGLE	99.51	POSITIVE	8.63	POSITIVE	#N/A	#N/A	#N/A	#N/A
147	NIRMAL	Female	52	HEAD NURSE	O GROUP	Rh+VE	Nurse	Yes	COVISHEILD	30	None	Yes	Mild	Yes	NILL	5	71	30.6	No	No	daily	< 7hrs	No	yes	NONVEGETARIAN	urban	NUCLAR	99.51	POSITIVE	7.16	POSITIVE	#N/A	#N/A	#N/A	#N/A
148	REDDYAMMA	Female	32	STAFF NURSE	A GROUP	Rh+VE	Nurse	Yes	COVISHEILD	25	None	No	NA	Yes	NILL	5.2	58	23.4	No	No	daily	7-8hrs	No	no	NONVEGETARIAN	urban	NUCLAR	99.83	POSITIVE	7.65	POSITIVE	#N/A	#N/A	#N/A	#N/A
149	MOULIKA	Female	33	STAFF NURSE	O GROUP	Rh+VE	Nurse	Yes	COVISHEILD	23	Fever,Myalgia	Yes	Severe	Yes	WEAKNESS	5.2	95	38.3	No	No	NONE	7-8hrs	No	yes	NONVEGETARIAN	urban	NUCLAR	99.74	POSITIVE	12.4	POSITIVE	#N/A	#N/A	#N/A	#N/A
150	PARAVATHI	Female	30	LAB TECHNICIAN	B GROUP	Rh+VE	Laboratory Technician	Yes	Covaxin	24	None	Yes	Severe	Yes	WEAKNESS	5	73	31.4	No	No	NONE	7-8hrs	No	no	NONVEGETARIAN	urban	NUCLAR	99.45	POSITIVE	12.42	POSITIVE	#N/A	#N/A	#N/A	#N/A
151	HANOK HAUDAYMOHAN	Male	29	DOCTOR	O GROUP	Rh+VE	Doctor/Clinician	Yes	Covaxin	30	None	No	NA	Yes	NILL	5.7	77	26.6	No	No	daily	7-8hrs	No	yes	NONVEGETARIAN	urban	SINGLE	81.92	POSITIVE	1.28	NEGATIVE	#N/A	#N/A	#N/A	#N/A
152	ROJA	Female	23	STAFF NURSE	O GROUP	Rh+VE	Nurse	Yes	Covaxin	40	Fever,Myalgia,Headache	No	NA	Yes	NILL	5.4	53	20.1	No	No	NONE	7-8hrs	No	no	NONVEGETARIAN	urban	SINGLE	95.79	POSITIVE	2.69	POSITIVE	#N/A	#N/A	#N/A	#N/A
153	DEPPA	Female	31	PA	B GROUP	Rh+VE	OTHERS	Yes	Covaxin	26	None	No	NA	No	NILL	5.4	72	27.2	No	No	daily	7-8hrs	No	no	NONVEGETARIAN	urban	NUCLAR	94.11	POSITIVE	1.33	NEGATIVE	#N/A	#N/A	#N/A	#N/A
154	VARUN	Male	30	DOCTOR	AB GROUP	Rh+VE	Doctor/Clinician	Yes	Covaxin	55	Myalgia	Yes	Moderate	Yes	WEAKNESS	5.4	76	28.8	No	Yes	daily	< 7hrs	No	yes	VEGETARIAN	urban	NUCLAR	97.88	POSITIVE	11.01	POSITIVE	98.34	POSITIVE	39.78	POSITIVE
155	LAKSHMI	Female	53	NA	O GROUP	Rh+VE	OTHERS	Yes	Covaxin	30	None	No	NA	No	NILL	5.2	60	24.2	No	No	NONE	7-8hrs	No	no	VEGETARIAN	urban	NUCLAR	88.23	POSITIVE	1.41	NEGATIVE	#N/A	#N/A	#N/A	#N/A
156	ANVESH SAI	Male	22	STUDENT	O GROUP	Rh+VE	OTHERS	Yes	COVISHEILD	35	Fever	No	NA	No	NILL	5.3	51	19.9	No	No	NONE	7-8hrs	No	no	NONVEGETARIAN	urban	SINGLE	99.62	POSITIVE	7.85	POSITIVE	#N/A	#N/A	#N/A	#N/A
157	YERRAM REDDY	Male	56	DEPUTY REGISTRAR	B GROUP	Rh+VE	Doctor/Clinician	Yes	COVISHEILD	32	None	No	NA	No	NILL	5.2	59	23.8	No	No	daily	< 7hrs	No	no	NONVEGETARIAN	urban	NUCLAR	72.79	POSITIVE	0.95	NEGATIVE	#N/A	#N/A	#N/A	#N/A
158	ASHOK KUMAR	Male	32	STAFF BOY	B GROUP	Rh+VE	OTHERS	Yes	COVISHEILD	35	Headache	No	NA	No	NILL	6	65	19.4	No	No	daily	7-8hrs	No	yes	NONVEGETARIAN	urban	NUCLAR	89.37	POSITIVE	2.12	POSITIVE	#N/A	#N/A	#N/A	#N/A
159	VISWANATH	Male	30	DOCTOR	O GROUP	Rh+VE	Doctor/Clinician	Yes	Covaxin	30	None	No	NA	Yes	NILL	5.4	73	27.6	No	No	daily	7-8hrs	No	no	NONVEGETARIAN	urban	SINGLE	51.75	POSITIVE	0.62	NEGATIVE	#N/A	#N/A	#N/A	#N/A
160	ROSHAN	Male	22	STUDENT	B GROUP	Rh+VE	OTHERS	Yes	COVISHEILD	46	Fever,Myalgia	No	NA	No	NILL	5.6	70	24.9	No	No	daily	7-8hrs	No	yes	VEGETARIAN	urban	NUCLAR	97.82	POSITIVE	3.25	POSITIVE	#N/A	#N/A	#N/A	#N/A
161	SREENIVASULU	Male	25	PA	A GROUP	Rh+VE	OTHERS	Yes	Covaxin	60	None	Yes	Mild	No	NILL	5.11	69	21.2	No	Yes	NONE	7-8hrs	No	no	NONVEGETARIAN	urban	NUCLAR	49.89	NEGATIVE	0.69	NEGATIVE	98.12	POSITIVE	39.29	POSITIVE
162	LOKESH	Male	25	PA	B GROUP	Rh+VE	Svims Administrative Staff	Yes	COVISHEILD	84	None	Yes	Mild	No	NILL	5.1	68	25.7	No	No	weekly	7-8hrs	No	no	NONVEGETARIAN	urban	NUCLAR	99.3	POSITIVE	5.03	POSITIVE	#N/A	#N/A	#N/A	#N/A
163	NARASHIMA	Male	53	WARD BOY	O GROUP	Rh+VE	Multipurpose Worker	Yes	COVISHEILD	30	Fever	No	NA	No	NILL	5.6	68	24.2	No	Yes	daily	7-8hrs	No	no	NONVEGETARIAN	urban	NUCLAR	99.71	POSITIVE	8.75	POSITIVE	#N/A	#N/A	#N/A	#N/A
164	SREERAMULU	Male	55	WARD BOY	O GROUP	Rh+VE	Multipurpose Worker	Yes	COVISHEILD	55	None	No	NA	No	NILL	5.6	64	22.8	No	No	daily	7-8hrs	No	no	NONVEGETARIAN	rural	NUCLAR	48.94	NEGATIVE	0.53	NEGATIVE	#N/A	#N/A	#N/A	#N/A
165	RAVINDRADEV	Male	30	ASSISTANT PROFESSOR	B GROUP	Rh-VE	Doctor/Clinician	Yes	COVISHEILD	32	Fever,Myalgia	Yes	Mild	Yes	NILL	5.9	78	25.4	No	Yes	daily	7-8hrs	No	no	NONVEGETARIAN	urban	NUCLAR	99.43	POSITIVE	5.82	POSITIVE	#N/A	#N/A	#N/A	#N/A
166	CHANDRASEKHARREDDY	Male	32	DOCTOR	B GROUP	Rh+VE	Doctor/Clinician	Yes	COVISHEILD	40	Fever,Myalgia	No	NA	Yes	NILL	5.7	69	23.8	No	No	NONE	< 7hrs	No	no	NONVEGETARIAN	urban	NUCLAR	81.75	POSITIVE	1.15	NEGATIVE	#N/A	#N/A	#N/A	#N/A
167	RAMA PAVAN	Male	32	DOCTOR	B GROUP	Rh+VE	Doctor/Clinician	Yes	COVISHEILD	31	Fever	No	NA	Yes	NILL	5.11	88	27.1	No	No	NONE	< 7hrs	No	yes	NONVEGETARIAN	urban	SINGLE	78.58	POSITIVE	0.72	NEGATIVE	#N/A	#N/A	#N/A	#N/A
168	SUNAY	Male	27	DOCTOR	B GROUP	Rh+VE	Doctor/Clinician	Yes	COVISHEILD	30	None	No	NA	Yes	NILL	5.11	74	22.8	No	No	weekly	< 7hrs	No	no	NONVEGETARIAN	urban	SINGLE	66.67	POSITIVE	0.76	NEGATIVE	#N/A	#N/A	#N/A	#N/A
169	SUBBAMANYAM	Male	45	WAED BOY	O GROUP	Rh+VE	Multipurpose Worker	Yes	Covaxin	35	None	No	NA	No	NILL	5.6	85	30.2	No	No	NONE	7-8hrs	No	no	NONVEGETARIAN	rural	SINGLE	55.3	POSITIVE	0.46	NEGATIVE	#N/A	#N/A	#N/A	#N/A
170	SOMASEKHER REDDY	Male	40	P C G LAB TECHNICIAN	B GROUP	Rh+VE	Laboratory Technician	Yes	COVISHEILD	28	None	Yes	Mild	Yes	NILL	5.6	78	30.2	No	No	daily	< 7hrs	No	yes	VEGETARIAN	urban	NUCLAR	99.62	POSITIVE	6.83	POSITIVE	#N/A	#N/A	#N/A	#N/A
171	YASODHA DEVI	Female	40	ECG LAB TECHNICIAN	B GROUP	Rh-VE	Laboratory Technician	Yes	COVISHEILD	25	None	No	NA	No	NILL	5.4	69	26.1	No	No	NONE	< 7hrs	Yes	yes	NONVEGETARIAN	urban	NUCLAR	82.47	POSITIVE	1.1	NEGATIVE	#N/A	#N/A	#N/A	#N/A
172	PUSPALATHA	Female	49	CBT LAB TECHNICIAN	A GROUP	Rh+VE	Hospital support staff	Yes	COVISHEILD	30	Fever,Myalgia	No	NA	No	NILL	5	64	27.6	No	No	daily	< 7hrs	No	no	VEGETARIAN	urban	NUCLAR	69.16	POSITIVE	0.82	NEGATIVE	#N/A	#N/A	#N/A	#N/A
173	RASEKAR VARMA	Male	32	DOCTOR	A GROUP	Rh+VE	Doctor/Clinician	Yes	COVISHEILD	40	Fever,Myalgia,Headache	Yes	Moderate	Yes	WEAKNESS	5.11	73	22.4	No	No	NONE	< 7hrs	No	yes	VEGETARIAN	urban	SINGLE	99.5	POSITIVE	5.34	POSITIVE	#N/A	#N/A	#N/A	#N/A
174	LEELA KRISHNA	Male	27	STUDENT	A GROUP	Rh+VE	OTHERS	Yes	Covaxin	35	None	No	NA	No	NILL	5.5	63	23.1	No	No	daily	7-8hrs	No	yes	NONVEGETARIAN	urban	NUCLAR	71.62	POSITIVE	1.4	NEGATIVE	#N/A	#N/A	#N/A	#N/A
175	NAGA MAHESH	Male	30	PA	AB GROUP	Rh-VE	Hospital support staff	Yes	COVISHEILD	47	None	No	NA	No	NILL	5.1	90	37.5	No	No	NONE	< 7hrs	Yes	yes	NONVEGETARIAN	urban	SINGLE	80.81	POSITIVE	2.15	POSITIVE	#N/A	#N/A	#N/A	#N/A
176	SREERAM	Male	35	SR DOCTOR	O GROUP	Rh+VE	Doctor/Clinician	Yes	COVISHEILD	30	None	Yes	Mild	Yes	NILL	5.7	66	22.8	No	No	daily	7-8hrs	No	yes	VEGETARIAN	urban	NUCLAR	99.66	POSITIVE	4.31	POSITIVE	#N/A	#N/A	#N/A	#N/A
177	ASHOK	Male	31	hospital support staff	O GROUP	Rh+VE	Hospital support staff	Yes	COVISHEILD	80	None	No	NA	No	NILL	5.5	70	25.7	No	No	NONE	7-8hrs	No	no	NONVEGETARIAN	urban	NUCLAR	99.77	POSITIVE	11.44	POSITIVE	#N/A	#N/A	#N/A	#N/A
178	GEETHA BAI	Female	53	HEAD NURSE	A GROUP	Rh+VE	Nurse	Yes	COVISHEILD	40	Fever,Myalgia	No	NA	Yes	NILL	5.2	63	25.4	No	No	NONE	< 7hrs	Yes	yes	NONVEGETARIAN	urban	NUCLAR	99.11	POSITIVE	2.11	POSITIVE	#N/A	#N/A	#N/A	#N/A
179	MEHA JABEEN	Female	40	STAFF NURSE	O GROUP	Rh+VE	Nurse	Yes	COVISHEILD	30	Fever,Headache,Myalgia	No	NA	Yes	NILL	5.4	59	22.3	No	No	daily	< 7hrs	No	yes	NONVEGETARIAN	urban	NUCLAR	99.59	POSITIVE	9.96	POSITIVE	#N/A	#N/A	#N/A	#N/A
180	VIJAYA BHARATHI	Female	55	LT GRADE 1	B GROUP	Rh+VE	Laboratory Technician	Yes	COVISHEILD	28	Headache,Myalgia,Irritability	Yes	Moderate	Yes	NILL	5.6	72	25.6	No	No	daily	< 7hrs	Yes	no	VEGETARIAN	urban	NUCLAR	98.91	POSITIVE	12.71	POSITIVE	97.56	POSITIVE	40.12	POSITIVE
181	KAVITHA	Female	30	LAB TECHNICIAN	O GROUP	Rh-VE	Laboratory Technician	Yes	COVISHEILD	28	None	Yes	Moderate	Yes	NILL	5.6	59	21	No	No	daily	7-8hrs	No	no	NONVEGETARIAN	urban	NUCLAR	99.51	POSITIVE	30.51	POSITIVE	#N/A	#N/A	#N/A	#N/A
182	RAMYA KRISHNA	Female	29	ECG TECHNICIAN	B GROUP	Rh+VE	Laboratory Technician	Yes	COVISHEILD	36	Fever,Headache,Irritability	Yes	Mild	Yes	NILL	5.2	76	30.6	No	No	weekly	7-8hrs	No	no	NONVEGETARIAN	urban	NUCLAR	99.47	POSITIVE	17.9	POSITIVE	99.21	POSITIVE	41.21	POSITIVE
183	PUSHPA	Female	29	ECG TECHNICIAN	O GROUP	Rh+VE	Laboratory Technician	Yes	COVISHEILD	28	Fever,Headache,Myalgia,Irritability	No	NA	Yes	NILL	5.2	56	22.6	No	No	daily	< 7hrs	No	no	NONVEGETARIAN	urban	NUCLAR	95.47	POSITIVE	8.58	POSITIVE	#N/A	#N/A	#N/A	#N/A
184	SUBRAMANIAN	Male	54	MRI TECHNICIAN	B GROUP	Rh+VE	Laboratory Technician	Yes	COVISHEILD	32	None	Yes	Moderate	Yes	NILL	5.3	66	25.8	No	No	NONE	7-8hrs	No	no	NONVEGETARIAN	urban	NUCLAR	99.64	POSITIVE	21.95	POSITIVE	#N/A	#N/A	#N/A	#N/A
185	ANJU	Female	47	DOCTOR	A GROUP	Rh-VE	Doctor/Clinician	Yes	COVISHEILD	30	None	No	NA	Yes	NILL	5.7	74	22.8	No	No	weekly	< 7hrs	No	no	NONVEGETARIAN	urban	NUCLAR	93.63	POSITIVE	12.1	POSITIVE	#N/A	#N/A	#N/A	#N/A
186	PRATHYUSHA	Female	40	DOCTOR	B GROUP	Rh-VE	Doctor/Clinician	Yes	COVISHEILD	34	Myalgia	No	NA	Yes	NILL	5.4	83	31.4	No	No	weekly	< 7hrs	No	no	NONVEGETARIAN	urban	NUCLAR	33.46	NEGATIVE	5.93	POSITIVE	#N/A	#N/A	#N/A	#N/A
187	KISHORE REDDY	Male	32	PA	O GROUP	Rh+VE	Svims Administrative Staff	Yes	COVISHEILD	28	None	Yes	Mild	No	NILL	5.8	70	23.5	No	No	daily	7-8hrs	No	no	NONVEGETARIAN	urban	NUCLAR	98.54	POSITIVE	13.88	POSITIVE	#N/A	#N/A	#N/A	#N/A
188	MAMATHA	Female	29	STAFF NURSE	O GROUP	Rh+VE	Nurse	Yes	COVISHEILD	32	None	No	NA	Yes	NILL	5.6	55	19.6	No	No	NONE	7-8hrs	No	no	NONVEGETARIAN	urban	NUCLAR	99.55	POSITIVE	16.7	POSITIVE	#N/A	#N/A	#N/A	#N/A
189	VENKATA SUBBAIAH	Male	26	LAB TECHNICIAN	B GROUP	Rh+VE	Laboratory Technician	Yes	COVISHEILD	64	None	Yes	Mild	Yes	NILL	5.9	70	22.8	No	No	NONE	7-8hrs	No	no	NONVEGETARIAN	urban	NUCLAR	99.49	POSITIVE	18.85	POSITIVE	#N/A	#N/A	#N/A	#N/A
190	MOUNIKA	Female	22	STUDENT CV	B GROUP	Rh+VE	Laboratory Technician	Yes	COVISHEILD	84	None	Yes	Mild	Yes	NILL	5.4	47	17.8	No	No	daily	7-8hrs	No	no	NONVEGETARIAN	urban	SINGLE	98.43	POSITIVE	12.96	POSITIVE	#N/A	#N/A	#N/A	#N/A
191	KRISHNA REDDY	Male	36	PA	O GROUP	Rh-VE	Svims Administrative Staff	Yes	COVISHEILD	80	None	No	NA	No	NILL	5.7	68	23.5	No	No	NONE	7-8hrs	No	no	VEGETARIAN	urban	NUCLAR	16.77	NEGATIVE	1.37	NEGATIVE	#N/A	#N/A	#N/A	#N/A
192	UDAY KUMAR	Male	25	LAB TECHNICIAN	B GROUP	Rh+VE	Laboratory Technician	Yes	COVISHEILD	84	Fever,Headache,Myalgia	Yes	Mild	Yes	NILL	5.6	68	24.2	No	Yes	NONE	7-8hrs	No	no	NONVEGETARIAN	urban	SINGLE	99.69	POSITIVE	14.64	POSITIVE	#N/A	#N/A	#N/A	#N/A
193	DEEPIKA	Female	29	PHD SCHOLOR	O GROUP	Rh+VE	Doctor/Clinician	Yes	COVISHEILD	84	None	No	NA	Yes	NILL	5.2	56	19.9	No	No	NONE	7-8hrs	No	no	NONVEGETARIAN	urban	NUCLAR	97.49	POSITIVE	11.59	POSITIVE	#N/A	#N/A	#N/A	#N/A
194	PRAVEEN KUMAR	Male	35	LAB TECHNICIAN	O GROUP	Rh+VE	Laboratory Technician	Yes	COVISHEILD	84	Fever,Headache,Myalgia,Irritability	Yes	Severe	Yes	NILL	5.6	92	32.7	No	Yes	weekly	7-8hrs	Yes	no	NONVEGETARIAN	urban	NUCLAR	99.49	POSITIVE	34.83	POSITIVE	#N/A	#N/A	#N/A	#N/A
195	CHAKRADHAR	Male	36	PA	A GROUP	Rh+VE	Svims Administrative Staff	Yes	COVISHEILD	84	Fever,Headache,Myalgia,Irritability	No	NA	No	NILL	5.6	81	28.8	No	No	NONE	7-8hrs	No	no	NONVEGETARIAN	urban	NUCLAR	96.74	POSITIVE	22.59	POSITIVE	#N/A	#N/A	#N/A	#N/A
196	RAVINDERNATH REDDY	Male	57	LAB TECHNICIAN	AB GROUP	Rh+VE	Laboratory Technician	Yes	COVISHEILD	28	None	No	NA	Yes	NILL	5.6	57	20.3	No	No	daily	< 7hrs	No	no	NONVEGETARIAN	urban	NUCLAR	61.23	POSITIVE	5.76	POSITIVE	#N/A	#N/A	#N/A	#N/A
197	DEVI	Female	36	PA	B GROUP	Rh+VE	Svims Administrative Staff	Yes	COVISHEILD	30	Fever,Myalgia	Yes	Moderate	No	NILL	4.8	63	31.1	No	No	daily	7-8hrs	No	no	NONVEGETARIAN	urban	NUCLAR	98.86	POSITIVE	15.76	POSITIVE	#N/A	#N/A	#N/A	#N/A
198	BHASKAR	Male	43	PA	B GROUP	Rh+VE	Svims Administrative Staff	Yes	COVISHEILD	30	Myalgia	Yes	Moderate	No	NILL	5.8	65	21.8	No	No	daily	7-8hrs	No	no	NONVEGETARIAN	urban	NUCLAR	99.34	POSITIVE	17.22	POSITIVE	#N/A	#N/A	#N/A	#N/A
199	PALLAVI	Female	28	STAFF NURSE	O GROUP	Rh+VE	Nurse	Yes	COVISHEILD	80	Irritability,Myalgia	No	NA	Yes	NILL	5.6	48	17.1	No	No	NONE	7-8hrs	No	no	NONVEGETARIAN	urban	NUCLAR	0.67	NEGATIVE	3.95	POSITIVE	#N/A	#N/A	#N/A	#N/A
200	BHANUMATHI	Female	30	STAFF NURSE	B GROUP	Rh-VE	Nurse	Yes	COVISHEILD	82	None	No	NA	Yes	NILL	5	60	17.1	No	No	NONE	7-8hrs	No	no	NONVEGETARIAN	urban	NUCLAR	99.52	POSITIVE	31.75	POSITIVE	#N/A	#N/A	#N/A	#N/A
201	NAVYA KEERTHANA	Female	30	RESEARCH ASSOCIATE	O GROUP	Rh+VE	Researchers	Yes	COVISHEILD	28	None	No	NA	No	NILL	5.6	61	25.8	No	No	NONE	7-8hrs	No	no	NONVEGETARIAN	urban	NUCLAR	54.04	POSITIVE	6.11	POSITIVE	#N/A	#N/A	#N/A	#N/A
202	LAKSHMI PRASANNA KUMAR	Male	39	LAB TECHNICIAN	B GROUP	Rh+VE	Laboratory Technician	Yes	COVISHEILD	28	Irritability	No	NA	Yes	NILL	5.9	74	21.7	No	No	NONE	7-8hrs	No	no	NONVEGETARIAN	urban	NUCLAR	10.88	NEGATIVE	3.82	POSITIVE	#N/A	#N/A	#N/A	#N/A
203	SRI PRASAD REDDY	Male	50	ATTENDER	UNKNOWN	UNKNOWN	OTHERS	Yes	Covaxin	30	Fever,Myalgia,Headache,Irritability	Yes	Moderate	Yes	NILL	5.7	78	24.1	No	No	weekly	7-8hrs	No	no	NONVEGETARIAN	urban	NUCLAR	41.52	NEGATIVE	1.29	NEGATIVE	97.28	POSITIVE	40.28	POSITIVE
204	HEMA LATHA	Female	56	ATTENDER	A GROUP	Rh+VE	OTHERS	Yes	Covaxin	28	None	No	NA	No	NILL	5.8	75	26.9	No	No	daily	7-8hrs	No	no	VEGETARIAN	urban	NUCLAR	96.87	POSITIVE	22.19	POSITIVE	#N/A	#N/A	#N/A	#N/A
205	RANGA RAJU	Male	36	PA	A GROUP	Rh+VE	Svims Administrative Staff	Yes	COVISHEILD	35	None	No	NA	No	NILL	5.4	73	27.5	No	Yes	NONE	7-8hrs	No	no	NONVEGETARIAN	urban	NUCLAR	78.91	POSITIVE	1.28	NEGATIVE	75.5224	POSITIVE	24.673	POSITIVE
206	MYTHILI	Female	41	STAFF NURSE	B GROUP	Rh+VE	Nurse	Yes	COVISHEILD	28	None	No	NA	Yes	NILL	5.6	60	27.6	No	No	NONE	7-8hrs	No	no	NONVEGETARIAN	urban	NUCLAR	97.38	POSITIVE	9.55	POSITIVE	#N/A	#N/A	#N/A	#N/A
207	RAGHU RAM	Male	32	DOCTOR	B GROUP	Rh-VE	Doctor/Clinician	Yes	COVISHEILD	28	Irritability	Yes	Moderate	Yes	NILL	5.7	85	21.3	No	No	daily	7-8hrs	No	no	NONVEGETARIAN	urban	NUCLAR	96.73	POSITIVE	12.53	POSITIVE	#N/A	#N/A	#N/A	#N/A
208	NAGARAJA REDDY	Male	38	DOCTOR	B GROUP	Rh+VE	Doctor/Clinician	Yes	COVISHEILD	28	Irritability	Yes	Mild	Yes	NILL	5.1	72	29.3	No	No	daily	7-8hrs	No	no	NONVEGETARIAN	urban	NUCLAR	98.61	POSITIVE	21.74	POSITIVE	#N/A	#N/A	#N/A	#N/A
209	KHAJAPEER	Male	26	LAB TECHNICIAN	O GROUP	Rh+VE	Laboratory Technician	Yes	COVISHEILD	30	Fever,Myalgia,Headache	Yes	Mild	Yes	NILL	5.8	62	30	No	No	NONE	7-8hrs	No	yes	NONVEGETARIAN	urban	SINGLE	99.39	POSITIVE	13.74	POSITIVE	#N/A	#N/A	#N/A	#N/A
210	SOBHA LATHA	Female	45	PA	B GROUP	Rh+VE	Svims Administrative Staff	Yes	COVISHEILD	NA	None	No	NA	No	NILL	5.1	65	20.8	No	No	NONE	7-8hrs	No	yes	NONVEGETARIAN	urban	NUCLAR	37.5	NEGATIVE	16.39	POSITIVE	94.1542	POSITIVE	30.7876	POSITIVE
211	KEERTHI	Female	33	PA	A GROUP	Rh+VE	Svims Administrative Staff	Yes	COVISHEILD	42	Headache,Fever,Myalgia	Yes	Mild	No	NILL	5.2	68	27.1	No	No	NONE	7-8hrs	Yes	yes	NONVEGETARIAN	urban	NUCLAR	96.05	POSITIVE	6.82	POSITIVE	98.2338	POSITIVE	16.8652	POSITIVE
212	SUJATHA	Female	38	STAFF NURSE	B GROUP	Rh+VE	Nurse	Yes	Covaxin	48	Fever	Yes	Mild	Yes	NILL	5.2	52	27.4	No	No	NONE	7-8hrs	No	no	NONVEGETARIAN	urban	NUCLAR	99.06	POSITIVE	29.91	POSITIVE	#N/A	#N/A	#N/A	#N/A
213	PRABHAVATHI	Female	48	ANM	B GROUP	Rh+VE	Nurse	Yes	COVISHEILD	56	Fever,Headache,Myalgia,Irritability	No	NA	Yes	NILL	5	47	21	No	No	NONE	< 7hrs	No	yes	NONVEGETARIAN	urban	NUCLAR	98.29	POSITIVE	7.33	POSITIVE	#N/A	#N/A	#N/A	#N/A
214	VIJAY BHASAKAR REDDY	Male	51	PA	O GROUP	Rh+VE	Svims Administrative Staff	Yes	COVISHEILD	40	None	No	NA	No	NILL	5.6	76	20.2	No	No	NONE	< 7hrs	No	yes	NONVEGETARIAN	urban	NUCLAR	12.27	NEGATIVE	1.45	NEGATIVE	77.1144	POSITIVE	16.7076	POSITIVE
215	JAYA	Female	21	STUDENT	O GROUP	Rh+VE	OTHERS	Yes	COVISHEILD	74	None	Yes	Mild	Yes	NILL	5.1	64	27	No	No	NONE	< 7hrs	No	no	NONVEGETARIAN	urban	SINGLE	19.14	NEGATIVE	0.77	NEGATIVE	98.89	POSITIVE	39.69	POSITIVE
216	VINETHA	Female	21	STUDENT	B GROUP	Rh+VE	OTHERS	Yes	COVISHEILD	75	Headache	No	NA	No	NILL	5.3	53	26.7	No	No	NONE	7-8hrs	No	no	NONVEGETARIAN	urban	SINGLE	10.1	NEGATIVE	1.21	NEGATIVE	#N/A	#N/A	#N/A	#N/A
217	DASKHAYANI	Female	21	STUDENT	A GROUP	Rh+VE	OTHERS	Yes	COVISHEILD	35	Fever	No	NA	No	NILL	5.6	54	20.7	No	No	daily	7-8hrs	No	no	NONVEGETARIAN	urban	SINGLE	15.47	NEGATIVE	3.76	POSITIVE	#N/A	#N/A	#N/A	#N/A
218	DHANA LAKSHMI	Female	21	STUDENT	A GROUP	Rh+VE	OTHERS	Yes	COVISHEILD	74	Headache	No	NA	No	NILL	5	43	19.2	No	No	NONE	7-8hrs	No	no	NONVEGETARIAN	urban	SINGLE	2.1	NEGATIVE	1.28	NEGATIVE	#N/A	#N/A	#N/A	#N/A
219	manjunath	Male	24	LAB TECHNICIAN	O GROUP	Rh+VE	Laboratory Technician	Yes	COVISHEILD	84	Headache	No	NA	No	NILL	5.8	53	18.5	No	No	NONE	< 7hrs	No	no	NONVEGETARIAN	urban	NUCLAR	99.3	POSITIVE	30.82	POSITIVE	#N/A	#N/A	#N/A	#N/A
220	nagajyothi	Female	21	STUDENT	B GROUP	Rh+VE	OTHERS	Yes	COVISHEILD	25	Fever,Headache	Yes	Mild	No	WEAKNESS	5.2	50	17.8	No	No	NONE	7-8hrs	No	no	NONVEGETARIAN	urban	SINGLE	86.81	POSITIVE	12.8	POSITIVE	#N/A	#N/A	#N/A	#N/A
221	REDDY MANOHAR	Male	21	LAB TECHNICIAN	O GROUP	Rh+VE	Laboratory Technician	No	not vaccinated	na	None	No	NA	No	NILL	5.8	65	20.2	No	No	NONE	7-8hrs	No	no	NONVEGETARIAN	urban	SINGLE	23.56	NEGATIVE	0.97	NEGATIVE	48.23	NEGATIVE	28.23	POSITIVE
222	NANDHAGOPAL	Male	42	MEDICAL CONSULTENT	B GROUP	Rh+VE	OTHERS	Yes	COVISHEILD	24	Myalgia,Fever	No	NA	No	NILL	5.6	90	21.8	No	No	NONE	< 7hrs	No	no	NONVEGETARIAN	urban	NUCLAR	99.28	POSITIVE	20.97	POSITIVE	#N/A	#N/A	#N/A	#N/A
223	RAVICHANDRAN	Male	60	ASSISTANT CONSULTENT	O GROUP	Rh+VE	OTHERS	Yes	COVISHEILD	75	None	No	NA	Yes	NILL	5.7	67	32	No	No	daily	< 7hrs	No	no	NONVEGETARIAN	urban	SINGLE	94.47	POSITIVE	10.25	POSITIVE	#N/A	#N/A	#N/A	#N/A
224	RAJA LAKSHMI	Female	32	DOCTOR	A GROUP	Rh+VE	Doctor/Clinician	No	not vaccinated	na	None	Yes	Mild	No	NILL	5.2	58	23.1	No	No	weekly	7-8hrs	No	no	NONVEGETARIAN	urban	NUCLAR	90.29	POSITIVE	17.65	POSITIVE	#N/A	#N/A	#N/A	#N/A
225	DEVA	Male	24	MEDICAL CONSULTENT	B GROUP	Rh+VE	OTHERS	No	not vaccinated	na	None	Yes	Mild	No	NILL	6.2	50	23.4	No	No	NONE	< 7hrs	Yes	no	NONVEGETARIAN	urban	SINGLE	70.4	POSITIVE	3.55	POSITIVE	94.59	POSITIVE	40.89	POSITIVE
226	SOWNDRIYA	Female	25	MEDICAL CONSULTENT	B GROUP	Rh+VE	OTHERS	Yes	COVISHEILD	23	Myalgia	No	NA	No	NILL	5.2	53	14.2	No	No	NONE	7-8hrs	No	no	NONVEGETARIAN	urban	SINGLE	32.17	NEGATIVE	1.24	NEGATIVE	#N/A	#N/A	#N/A	#N/A
227	SHABANA	Female	29	hospital support staff	B GROUP	Rh+VE	Multipurpose Worker	Yes	COVISHEILD	29	Fever	No	NA	No	NILL	5.5	69	21.4	No	No	NONE	< 7hrs	Yes	yes	NONVEGETARIAN	urban	NUCLAR	99.46	POSITIVE	16.11	POSITIVE	#N/A	#N/A	#N/A	#N/A
228	DEVIKA	Female	25	STUDENT	B GROUP	Rh+VE	OTHERS	No	not vaccinated	na	None	No	NA	No	NILL	5.4	50	25.3	No	No	NONE	7-8hrs	No	no	NONVEGETARIAN	urban	NUCLAR	5.94	NEGATIVE	1.27	NEGATIVE	#N/A	#N/A	#N/A	#N/A
229	KALYANI	Female	58	HEAD NURSE	O GROUP	Rh+VE	Nurse	Yes	COVISHEILD	60	Headache,Fever	No	NA	Yes	NILL	5.5	70	18.9	No	No	NONE	7-8hrs	No	no	NONVEGETARIAN	urban	NUCLAR	99.42	POSITIVE	14.36	POSITIVE	#N/A	#N/A	#N/A	#N/A
230	HEMA LATHA	Female	55	STAFF NURSE	AB GROUP	Rh+VE	Nurse	Yes	COVISHEILD	30	None	Yes	Mild	Yes	NILL	5.7	72	25.7	No	No	NONE	< 7hrs	Yes	yes	NONVEGETARIAN	rural	NUCLAR	99.18	POSITIVE	17.72	POSITIVE	74.9005	POSITIVE	36.1874	POSITIVE
231	SHENMUGAVALLI	Female	29	hospital support staff	A GROUP	Rh+VE	Hospital support staff	Yes	COVISHEILD	29	Fever,Headache,Myalgia	No	NA	No	NILL	5.2	60	24.9	No	No	NONE	7-8hrs	No	no	VEGETARIAN	urban	SINGLE	99.56	POSITIVE	30.6	POSITIVE	#N/A	#N/A	#N/A	#N/A
232	RUKMINAMMA	Female	39	STAFF NURSE	AB GROUP	Rh+VE	Nurse	Yes	COVISHEILD	30	Irritability	Yes	Mild	Yes	WEAKNESS	5.3	64	24.2	No	No	NONE	< 7hrs	No	yes	NONVEGETARIAN	urban	NUCLAR	93.65	POSITIVE	12.26	POSITIVE	#N/A	#N/A	#N/A	#N/A
233	SHOBHA RANI	Female	33	STAFF NURSE	B GROUP	Rh+VE	Nurse	Yes	COVISHEILD	30	None	No	NA	Yes	NILL	5	60	25	No	No	NONE	7-8hrs	No	no	NONVEGETARIAN	urban	NUCLAR	99.57	POSITIVE	24.32	POSITIVE	#N/A	#N/A	#N/A	#N/A
234	RAMADEVI	Female	39	STAFF NURSE	AB GROUP	Rh+VE	Nurse	Yes	COVISHEILD	30	None	Yes	Mild	Yes	NILL	5.3	70	25.8	No	No	daily	< 7hrs	No	no	NONVEGETARIAN	urban	NUCLAR	99.56	POSITIVE	27.61	POSITIVE	#N/A	#N/A	#N/A	#N/A
235	CHANDRASEKHARREDDY	Male	43	PA	O GROUP	Rh+VE	Svims Administrative Staff	Yes	COVISHEILD	40	None	No	NA	No	NILL	5.7	62	27.3	No	No	daily	7-8hrs	No	no	NONVEGETARIAN	urban	NUCLAR	98.02	POSITIVE	18.33	POSITIVE	#N/A	#N/A	#N/A	#N/A
236	HEMANTH KUMAR	Male	25	PA	UNKNOWN	UNKNOWN	OTHERS	Yes	COVISHEILD	32	None	No	NA	No	NILL	5.6	83	21.4	No	No	daily	7-8hrs	No	no	NONVEGETARIAN	urban	SINGLE	65.91	POSITIVE	12.07	POSITIVE	#N/A	#N/A	#N/A	#N/A
237	LOKESWERI	Female	33	LAB TECHNICIAN	O GROUP	Rh+VE	Laboratory Technician	Yes	COVISHEILD	NA	None	No	NA	No	NILL	5.7	65	29.5	No	No	NONE	7-8hrs	No	no	NONVEGETARIAN	urban	NUCLAR	88.57	POSITIVE	7.39	POSITIVE	#N/A	#N/A	#N/A	#N/A
238	BHARGAVI	Female	29	LAB TECHNICIAN	A GROUP	Rh+VE	Laboratory Technician	Yes	COVISHEILD	64	Fever,Headache,Myalgia	No	NA	No	NILL	5.2	58	22.4	No	No	NONE	7-8hrs	No	yes	NONVEGETARIAN	urban	NUCLAR	99.36	POSITIVE	19.74	POSITIVE	#N/A	#N/A	#N/A	#N/A
239	DEVIKAMMA	Female	32	PA	B GROUP	Rh+VE	Svims Administrative Staff	Yes	COVISHEILD	60	Fever,Headache,Myalgia	No	NA	No	NILL	4.9	63	23.4	No	No	NONE	7-8hrs	No	no	NONVEGETARIAN	urban	NUCLAR	99.34	POSITIVE	21.29	POSITIVE	#N/A	#N/A	#N/A	#N/A
240	SAHADEVA REDDY	Male	47	ATTENDER	UNKNOWN	UNKNOWN	OTHERS	Yes	COVISHEILD	40	Fever	No	NA	No	NILL	6	58	30.1	No	No	NONE	7-8hrs	No	no	NONVEGETARIAN	urban	NUCLAR	99.6	POSITIVE	21.36	POSITIVE	#N/A	#N/A	#N/A	#N/A
241	SUNIL KUMAR	Male	29	WARD BOY	B GROUP	Rh+VE	Multipurpose Worker	Yes	COVISHEILD	30	Fever,Headache	Yes	Mild	No	NILL	5.6	55	17.3	No	Yes	NONE	7-8hrs	No	no	NONVEGETARIAN	urban	NUCLAR	97.51	POSITIVE	13.93	POSITIVE	#N/A	#N/A	#N/A	#N/A
242	GURUVAIH	Male	28	WARD BOY	B GROUP	Rh+VE	Multipurpose Worker	Yes	COVISHEILD	30	Myalgia	No	NA	No	NILL	5.1	69	19.6	No	Yes	daily	7-8hrs	No	no	NONVEGETARIAN	rural	NUCLAR	99.19	POSITIVE	19.18	POSITIVE	#N/A	#N/A	#N/A	#N/A
243	BABU REDDY	Male	33	LAB TECHNICIAN	B GROUP	Rh-VE	Laboratory Technician	Yes	COVISHEILD	32	Fever,Headache,Myalgia	No	NA	Yes	NILL	5.1	61	28.7	No	No	daily	< 7hrs	Yes	no	NONVEGETARIAN	urban	NUCLAR	74.28	POSITIVE	1.37	NEGATIVE	#N/A	#N/A	#N/A	#N/A
244	SURESH BABU	Male	40	ASSISTANT PROFESSOR	B GROUP	Rh+VE	Doctor/Clinician	Yes	COVISHEILD	30	Fever,Myalgia	Yes	Moderate	Yes	NILL	5.4	75	25.4	No	No	NONE	7-8hrs	No	no	NONVEGETARIAN	urban	NUCLAR	99.49	POSITIVE	28.01	POSITIVE	#N/A	#N/A	#N/A	#N/A
245	ARUN	Male	38	ASSOCIATE PROFESSOR	O GROUP	Rh+VE	Doctor/Clinician	Yes	COVISHEILD	42	None	No	NA	Yes	NILL	5.8	74	28.4	No	No	NONE	7-8hrs	No	no	NONVEGETARIAN	urban	NUCLAR	86.31	POSITIVE	4.014	POSITIVE	#N/A	#N/A	#N/A	#N/A
246	RAVI KANTH	Male	35	PG	B GROUP	Rh+VE	Doctor/Clinician	Yes	COVISHEILD	30	Fever,Myalgia	Yes	Asymptomatic	Yes	NILL	5.4	72	24.8	No	No	daily	< 7hrs	No	no	NONVEGETARIAN	urban	NUCLAR	38.06	NEGATIVE	1.19	NEGATIVE	98.24	POSITIVE	39.35	POSITIVE
247	HARI PRASAD	Male	46	WORKER	UNKNOWN	UNKNOWN	Multipurpose Worker	Yes	Covaxin	45	None	Yes	Mild	Yes	NILL	5.6	83	27.2	No	Yes	NONE	7-8hrs	No	no	NONVEGETARIAN	urban	NUCLAR	93.1	POSITIVE	21.97	POSITIVE	97.3756	POSITIVE	47.7327	POSITIVE
248	Vinod Bhan	Male	52	Professor	B GROUP	Rh+VE	Doctor/Clinician	YES	COVISHEILD	30	None	No	Asymptomatic	Yes	NILL	5.1	78	29.5	NO	NO	DAILY	< 7hrs	NO	NO	NONVEGETARIAN	URBAN	NUCLAR	59.02	POSITIVE	1.34	NEGATIVE	#N/A	#N/A	#N/A	#N/A
249	Naveen kumar Adupuru	Male	35	Senior Resident	O GROUP	Rh+VE	Doctor/Clinician	YES	COVISHEILD	30	None	No	Asymptomatic	Yes	NILL	5.8	88	32.5	NO	NO	WEEKLY	< 7hrs	NO	NO	NONVEGETARIAN	URBAN	NUCLAR	10.68	NEGATIVE	1.14	NEGATIVE	72.03	POSITIVE	34.25	POSITIVE
250	USHA MATIALAGIN	Female	33	DOCTOR	O GROUP	Rh+VE	Doctor/Clinician	YES	COVISHEILD	80	None	No	NA	No	NILL	5.4	70	29.5	NO	NO	NONE	7-8hrs	NO	NO	NONVEGETARIAN	URBAN	NUCLAR	39.46	NEGATIVE	4.21	POSITIVE	#N/A	#N/A	#N/A	#N/A
251	Lavanya BELLAMKONDA	Female	29	PA	B GROUP	Rh+VE	Svims Administrative Staff	YES	COVISHEILD	30	Fever	YES	Mild	No	WEAKNESS	5.4	80	26.5	NO	NO	NONE	< 7hrs	NO	NO	NONVEGETARIAN	URBAN	NUCLAR	97.74	POSITIVE	36.42	POSITIVE	#N/A	#N/A	#N/A	#N/A
252	DEPPA PANAGIRI	Female	34	PA	B GROUP	Rh+VE	OTHERS	YES	COVISHEILD	30	None	YES	Mild	No	NILL	5.1	70	30.3	NO	NO	NONE	7-8hrs	NO	NO	NONVEGETARIAN	URBAN	NUCLAR	99.43	POSITIVE	19.66	POSITIVE	#N/A	#N/A	#N/A	#N/A
253	MANOHAR GPOVINDHASWAMY	Male	38	LAB TECHNICIAN	A GROUP	Rh+VE	Laboratory Technician	YES	COVISHEILD	60	Myalgia	YES	Mild	Yes	NILL	5.1	73	29.2	NO	YES	NONE	< 7hrs	NO	NO	NONVEGETARIAN	URBAN	NUCLAR	99.43	POSITIVE	19.9	POSITIVE	94.49	POSITIVE	18.5585	POSITIVE
254	DHANA BHAGYAVATHI DAMA	Female	43	PA	A GROUP	Rh+VE	OTHERS	YES	COVISHEILD	30	None	No	NA	No	NILL	5.6	70	30.4	NO	NO	NONE	7-8hrs	NO	NO	NONVEGETARIAN	URBAN	NUCLAR	98.92	POSITIVE	19.92	POSITIVE	#N/A	#N/A	#N/A	#N/A
255	SREEDEVI BANDA	Female	31	PA	O GROUP	Rh+VE	OTHERS	YES	COVISHEILD	35	Fever	No	NA	No	NILL	4.7	65	24.9	NO	NO	NONE	7-8hrs	NO	NO	NONVEGETARIAN	URBAN	NUCLAR	98.72	POSITIVE	17.45	POSITIVE	#N/A	#N/A	#N/A	#N/A
256	RAJESH PASELI	Male	40	PA	B GROUP	Rh-VE	OTHERS	YES	COVISHEILD	84	None	No	NA	No	NILL	5.3	64	33.3	NO	NO	NONE	< 7hrs	NO	NO	NONVEGETARIAN	RURAL	NUCLAR	38.37	NEGATIVE	1.48	NEGATIVE	#N/A	#N/A	#N/A	#N/A
257	RAMA CHEKURI	Female	41	PA	O GROUP	Rh+VE	OTHERS	YES	COVISHEILD	40	Fever, Myalgia	No	NA	No	NILL	5.8	69	25	NO	NO	NONE	< 7hrs	NO	NO	NONVEGETARIAN	URBAN	NUCLAR	99.41	POSITIVE	18.03	POSITIVE	#N/A	#N/A	#N/A	#N/A
258	ARUNA CHINNAKALAPPAGARI	Female	48	PA	B GROUP	Rh+VE	Svims Administrative Staff	YES	Covaxin	40	Headache	YES	Mild	No	NILL	5.4	80	23.1	NO	NO	DAILY	< 7hrs	NO	YES	NONVEGETARIAN	URBAN	NUCLAR	99.19	POSITIVE	27.79	POSITIVE	#N/A	#N/A	#N/A	#N/A
259	PHANISREE CHARUKUPALLI	Female	40	PA	O GROUP	Rh+VE	OTHERS	YES	COVISHEILD	40	Fever	No	NA	No	NILL	5.4	72	30.3	NO	NO	NONE	< 7hrs	YES	YES	VEGETARIAN	URBAN	NUCLAR	99.55	POSITIVE	20.55	POSITIVE	88.694	POSITIVE	19.8449	POSITIVE
260	BHARATH DUDDELA	Female	50	PA	B GROUP	Rh+VE	OTHERS	YES	COVISHEILD	74	None	No	NA	No	NILL	5	60	27.2	NO	NO	DAILY	7-8hrs	NO	NO	NONVEGETARIAN	URBAN	NUCLAR	37.43	NEGATIVE	4.62	POSITIVE	#N/A	#N/A	#N/A	#N/A
261	SUNEELA KOTI	Female	46	PA	Unknown	UNKNOWN	OTHERS	YES	COVISHEILD	80	None	No	NA	No	NILL	5.5	84	25.8	NO	NO	NONE	< 7hrs	NO	NO	VEGETARIAN	URBAN	NUCLAR	99.43	POSITIVE	35.17	POSITIVE	87.8731	POSITIVE	16.6742	POSITIVE
262	VINETHALAKSHMI TUPILLA	Female	27	PA	O GROUP	Rh+VE	OTHERS	YES	COVISHEILD	40	Fever	YES	Mild	No	NILL	5.3	54	30.8	NO	NO	DAILY	< 7hrs	NO	YES	NONVEGETARIAN	URBAN	SINGLE	99.47	POSITIVE	18.15	POSITIVE	#N/A	#N/A	#N/A	#N/A
263	KANTHAMMA IERGU	Female	53	HEAD NURSE	B GROUP	Rh+VE	Nurse	YES	COVISHEILD	75	Headache	YES	Severe	Yes	WEAKNESS	5	60	32.8	NO	NO	DAILY	< 7hrs	NO	NO	VEGETARIAN	URBAN	NUCLAR	99.5	POSITIVE	23.64	POSITIVE	#N/A	#N/A	#N/A	#N/A
264	SIVASANKAR REDDY SURA	Male	39	PA	O GROUP	Rh+VE	OTHERS	YES	COVISHEILD	40	Fever, Myalgia, Headache, Irritability	No	NA	No	NILL	5.1	75	25.8	NO	YES	DAILY	< 7hrs	NO	NO	NONVEGETARIAN	RURAL	NUCLAR	59.88	POSITIVE	2.8	POSITIVE	#N/A	#N/A	#N/A	#N/A
265	SIVAKUMAR KASALA	Male	37	PA	B GROUP	Rh+VE	OTHERS	YES	COVISHEILD	30	Fever	YES	Mild	No	NILL	5.6	80	31.2	NO	NO	NONE	< 7hrs	NO	YES	NONVEGETARIAN	URBAN	NUCLAR	97.74	POSITIVE	16.42	POSITIVE	#N/A	#N/A	#N/A	#N/A
266	LOKESH PANIGRAHI	Male	26	RESEARCH SCIENTIST	B GROUP	Rh+VE	Researchers	YES	COVISHEILD	50	None	YES	Mild	Yes	NILL	5.1	72	28.5	NO	NO	NONE	7-8hrs	NO	NO	NONVEGETARIAN	URBAN	NUCLAR	99.25	POSITIVE	15.73	POSITIVE	#N/A	#N/A	#N/A	#N/A
267	RAMA KANCHI	Female	31	RESEARCH SCIENTIST	O GROUP	Rh+VE	Researchers	YES	Covaxin	40	None	No	NA	No	NILL	4.9	65	30	NO	NO	NONE	7-8hrs	NO	NO	NONVEGETARIAN	RURAL	NUCLAR	4.96	NEGATIVE	1.01	NEGATIVE	#N/A	#N/A	#N/A	#N/A
268	VIVEKANAND KRISHNAN	Male	54	CMRO	O GROUP	Rh+VE	Svims Administrative Staff	YES	COVISHEILD	60	None	No	NA	No	NILL	5.11	78	31	NO	NO	NONE	7-8hrs	NO	NO	NONVEGETARIAN	URBAN	NUCLAR	99.14	POSITIVE	16.74	POSITIVE	#N/A	#N/A	#N/A	#N/A
269	SURENDERNATH REDDY GURAMKONDA	Male	51	SENIOR ASSISTANT	O GROUP	Rh+VE	Svims Administrative Staff	YES	COVISHEILD	30	None	No	NA	No	NILL	5.6	72	24	NO	NO	DAILY	7-8hrs	NO	NO	NONVEGETARIAN	URBAN	NUCLAR	5.4	NEGATIVE	1.18	NEGATIVE	#N/A	#N/A	#N/A	#N/A
270	RAJASEKAR KOTTE	Male	55	SENIOR ASSISTANT	O GROUP	Rh+VE	Svims Administrative Staff	YES	COVISHEILD	30	Myalgia	YES	Mild	No	NILL	5.8	81	25.6	NO	YES	DAILY	7-8hrs	NO	NO	VEGETARIAN	URBAN	NUCLAR	97.14	POSITIVE	9.66	POSITIVE	99.34	POSITIVE	41.85	POSITIVE
271	GOVINDHARAJU ML	Male	58	SUPERIDENT	AB GROUP	Rh+VE	Svims Administrative Staff	YES	COVISHEILD	30	Myalgia	No	NA	No	NILL	5.5	84	27.2	NO	NO	DAILY	< 7hrs	YES	YES	NONVEGETARIAN	URBAN	NUCLAR	8.97	NEGATIVE	1.07	NEGATIVE	#N/A	#N/A	#N/A	#N/A
272	KRISHNAVENI KONETI	Female	37	STAFF NURSE	A GROUP	Rh+VE	Nurse	YES	COVISHEILD	32	None	No	NA	No	NILL	5.1	65	30.8	NO	NO	DAILY	7-8hrs	NO	YES	NONVEGETARIAN	URBAN	NUCLAR	99.1	POSITIVE	15.45	POSITIVE	#N/A	#N/A	#N/A	#N/A
273	SRINIVASA BONDU	Male	32	hospital support staff	O GROUP	Rh+VE	OTHERS	YES	COVISHEILD	45	None	No	NA	No	NILL	5.9	71	27.1	NO	NO	DAILY	< 7hrs	NO	NO	VEGETARIAN	URBAN	SINGLE	90.5	POSITIVE	2.97	POSITIVE	#N/A	#N/A	#N/A	#N/A
274	HAMAD SHARIF SHAIK	Male	25	RESEARCH SCIENTIST	B GROUP	Rh+VE	Researchers	No	not vaccinated	na	None	YES	Mild	Yes	NILL	5.4	62	23.1	NO	NO	NONE	7-8hrs	NO	NO	NONVEGETARIAN	RURAL	NUCLAR	15.5	NEGATIVE	1.45	NEGATIVE	98.02	POSITIVE	42.21	POSITIVE
275	LOKESH KUMAR REDDY KADAPAGUNTA	Male	34	PA	O GROUP	Rh+VE	OTHERS	YES	COVISHEILD	37	None	YES	Mild	No	NILL	5.4	70	23.5	NO	NO	NONE	7-8hrs	NO	NO	NONVEGETARIAN	URBAN	NUCLAR	97.75	POSITIVE	12.7	POSITIVE	#N/A	#N/A	#N/A	#N/A
276	MUNIKUMAR RAMAPURAM	Male	31	PA	B GROUP	Rh+VE	OTHERS	YES	COVISHEILD	74	None	YES	Mild	No	NILL	5.5	90	26.5	NO	YES	NONE	7-8hrs	NO	NO	NONVEGETARIAN	URBAN	NUCLAR	99.25	POSITIVE	11.89	POSITIVE	#N/A	#N/A	#N/A	#N/A
277	GUNAVARDHANI BATREDDY	Female	23	PA	O GROUP	Rh+VE	OTHERS	YES	COVISHEILD	32	Headache	No	NA	No	NILL	5.4	40	33	NO	NO	NONE	7-8hrs	NO	NO	NONVEGETARIAN	URBAN	NUCLAR	94.52	POSITIVE	8.03	POSITIVE	#N/A	#N/A	#N/A	#N/A
278	INDIRAMMA KUPPALA	Female	54	ANM	O GROUP	Rh+VE	Nurse	YES	COVISHEILD	32	Fever, Myalgia, Headache, Irritability	No	NA	No	NILL	5.6	81	15.1	NO	NO	DAILY	< 7hrs	YES	YES	NONVEGETARIAN	URBAN	NUCLAR	78.03	POSITIVE	1.49	NEGATIVE	#N/A	#N/A	#N/A	#N/A
279	GURUNATH BIKKA	Male	23	STAFF NURSE	O GROUP	Rh+VE	Nurse	YES	Covaxin	64	Myalgia, Headache	YES	Moderate	Yes	NILL	5.6	45	28.8	NO	NO	DAILY	> 8hrs	NO	NO	NONVEGETARIAN	URBAN	SINGLE	86.42	POSITIVE	7.52	POSITIVE	#N/A	#N/A	#N/A	#N/A
280	HEMADHARA REDDY VANGURU	Male	34	WORKER	Unknown	UNKNOWN	Multipurpose worker	YES	COVISHEILD	84	Fever, Myalgia, Headache, Irritability	No	NA	No	NILL	5.8	63	16	NO	NO	DAILY	< 7hrs	NO	NO	NONVEGETARIAN	URBAN	SINGLE	99.46	POSITIVE	14.01	POSITIVE	#N/A	#N/A	#N/A	#N/A
281	HARITHA BOORSU	Female	27	PA	O GROUP	Rh+VE	Svims Administrative Staff	YES	COVISHEILD	84	Myalgia	YES	Moderate	No	NILL	5.6	47	21.1	NO	NO	NONE	< 7hrs	NO	NO	NONVEGETARIAN	URBAN	NUCLAR	99.33	POSITIVE	8.68	POSITIVE	#N/A	#N/A	#N/A	#N/A
282	JANAKI VEESAM	Female	23	PA	B GROUP	Rh+VE	Svims Administrative Staff	YES	COVISHEILD	84	None	No	NA	No	NILL	5.4	48	16.7	NO	NO	NONE	7-8hrs	NO	NO	NONVEGETARIAN	URBAN	NUCLAR	88.34	POSITIVE	14.16	POSITIVE	#N/A	#N/A	#N/A	#N/A
283	SAILAJA MADDALI	Female	45	PA	B GROUP	Rh+VE	Svims Administrative Staff	YES	COVISHEILD	84	Myalgia	No	NA	No	NILL	5.6	85	18.2	NO	NO	DAILY	< 7hrs	NO	NO	VEGETARIAN	URBAN	NUCLAR	99.67	POSITIVE	23.08	POSITIVE	#N/A	#N/A	#N/A	#N/A
284	MADHAVI THALLA	Female	45	WORKER	Unknown	UNKNOWN	Multipurpose worker	YES	COVISHEILD	30	None	No	NA	No	NILL	5.6	68	30.2	NO	NO	DAILY	7-8hrs	NO	NO	NONVEGETARIAN	URBAN	NUCLAR	49.49	NEGATIVE	3.85	POSITIVE	#N/A	#N/A	#N/A	#N/A
285	SEKHAR BHOOPAL	Male	55	PA	AB GROUP	Rh+VE	Svims Administrative Staff	YES	COVISHEILD	28	Fever	No	NA	No	NILL	5.8	60	24.2	YES	YES	WEEKLY	7-8hrs	NO	NO	NONVEGETARIAN	URBAN	NUCLAR	27.36	NEGATIVE	1.12	NEGATIVE	#N/A	#N/A	#N/A	#N/A
286	BALA KRISHNA BEGALA	Male	43	WORKER	O GROUP	Rh+VE	Multipurpose worker	YES	COVISHEILD	30	Headache, Myalgia	No	NA	No	NILL	5.6	63	20.1	YES	YES	DAILY	7-8hrs	NO	NO	NONVEGETARIAN	URBAN	NUCLAR	50.59	POSITIVE	1.12	NEGATIVE	#N/A	#N/A	#N/A	#N/A
287	JHANSI DAYANIDI	Female	23	PA	A GROUP	Rh+VE	Svims Administrative Staff	No	not vaccinated	na	None	YES	Moderate	No	NILL	5.4	55	22.4	NO	NO	NONE	< 7hrs	NO	NO	NONVEGETARIAN	URBAN	SINGLE	47.48	NEGATIVE	1.48	NEGATIVE	99.21	POSITIVE	42.25	POSITIVE
288	SARADHA DEVI JALAKAM	Female	56	NURSING SUPERIDENT	B GROUP	Rh+VE	Nurse	YES	COVISHEILD	45	Irritability	YES	Mild	Yes	NILL	5.6	63	20.8	NO	NO	DAILY	< 7hrs	YES	YES	NONVEGETARIAN	URBAN	NUCLAR	99.45	POSITIVE	8.65	POSITIVE	#N/A	#N/A	#N/A	#N/A
289	RAJINI PRIYA SODAVADAM ELLAIAH	Female	52	HEAD NURSE	A GROUP	Rh+VE	Nurse	YES	COVISHEILD	30	None	YES	Mild	Yes	NILL	5.4	55	22.4	NO	NO	DAILY	< 7hrs	NO	NO	NONVEGETARIAN	URBAN	NUCLAR	99.58	POSITIVE	24.24	POSITIVE	#N/A	#N/A	#N/A	#N/A
290	MADHULATHA MUDURU	Female	31	LAB TECHNICIAN	A GROUP	Rh+VE	Laboratory Technician	YES	COVISHEILD	60	None	No	NA	No	NILL	5.5	74	20.8	NO	NO	NONE	< 7hrs	NO	NO	NONVEGETARIAN	URBAN	NUCLAR	85.09	POSITIVE	1.46	NEGATIVE	#N/A	#N/A	#N/A	#N/A
291	SWARNA LATHA THAMBALLAPALLI VENKATESWARLU	Female	49	STAFF NURSE	O GROUP	Rh+VE	Nurse	YES	COVISHEILD	60	None	No	NA	No	NILL	5	60	27.1	NO	NO	DAILY	7-8hrs	NO	NO	NONVEGETARIAN	URBAN	NUCLAR	99.24	POSITIVE	9.4	POSITIVE	#N/A	#N/A	#N/A	#N/A
292	LAKSHMANNA NALUGOTLA	Male	39	ASSISTANT PROFESSOR	A GROUP	Rh+VE	Doctor/Clinician	YES	COVISHEILD	28	None	No	NA	No	NILL	5.7	94	25.8	NO	NO	DAILY	7-8hrs	NO	NO	NONVEGETARIAN	URBAN	NUCLAR	43.89	NEGATIVE	1.04	NEGATIVE	#N/A	#N/A	#N/A	#N/A
293	POOJITHA MUNDLAPATI	Female	26	PHARMOCO VIGILENCE ASSOCIATE	O GROUP	Rh+VE	Doctor/Clinician	YES	COVISHEILD	60	None	No	NA	No	NILL	5.3	46	32.5	NO	NO	NONE	7-8hrs	NO	NO	NONVEGETARIAN	URBAN	SINGLE	88.26	POSITIVE	5.31	POSITIVE	#N/A	#N/A	#N/A	#N/A
294	LEELAVATHI MALLUPULA	Female	44	PA	O GROUP	Rh-VE	OTHERS	YES	COVISHEILD	45	None	YES	Mild	No	NILL	45	76	18	NO	NO	NONE	< 7hrs	YES	NO	NONVEGETARIAN	URBAN	NUCLAR	99.57	POSITIVE	12.84	POSITIVE	#N/A	#N/A	#N/A	#N/A
295	MANJULA EPPARLLA	Female	34	STAFF NURSE	O GROUP	Rh+VE	Nurse	YES	Covaxin	60	None	YES	Mild	Yes	NILL	5.4	57	41.9	NO	NO	NONE	7-8hrs	NO	NO	NONVEGETARIAN	URBAN	NUCLAR	81.05	POSITIVE	4.96	POSITIVE	#N/A	#N/A	#N/A	#N/A
296	VARALAKSHMI YEESALAPAURAM	Female	47	LAB TECHNICIAN	A GROUP	Rh+VE	Laboratory Technician	YES	COVISHEILD	30	Myalgia	No	NA	No	NILL	5.4	74	21.6	NO	NO	NONE	7-8hrs	NO	NO	NONVEGETARIAN	URBAN	NUCLAR	99.26	POSITIVE	8.42	POSITIVE	#N/A	#N/A	#N/A	#N/A
297	SUBBAMMA PULAKUNTALA	Female	35	LAB TECHNICIAN	AB GROUP	Rh+VE	Laboratory Technician	YES	COVISHEILD	60	Fever, Myalgia	YES	Severe	No	WEAKNESS	5.3	57	28	NO	NO	NONE	7-8hrs	NO	NO	NONVEGETARIAN	URBAN	NUCLAR	99.46	POSITIVE	10.31	POSITIVE	#N/A	#N/A	#N/A	#N/A
298	NAGA LAKSHMI PRASANNA DURJATI	Female	56	LAB TECHNICIAN	O GROUP	Rh+VE	Laboratory Technician	YES	COVISHEILD	31	Fever	YES	Mild	No	NILL	5	70	22.3	NO	NO	NONE	< 7hrs	NO	YES	VEGETARIAN	RURAL	NUCLAR	99.25	POSITIVE	7.43	POSITIVE	#N/A	#N/A	#N/A	#N/A
299	AYYAPPA MANDLA	Male	23	STUDENT	Unknown	UNKNOWN	OTHERS	YES	COVISHEILD	34	Headache	YES	Mild	No	NILL	5.6	50	30.1	NO	NO	DAILY	7-8hrs	NO	NO	NONVEGETARIAN	URBAN	SINGLE	99.65	POSITIVE	9.71	POSITIVE	#N/A	#N/A	#N/A	#N/A
300	UMAKANTH VANKADOTH	Male	29	RESEARCH SCIENTIST	A GROUP	Rh+VE	Researchers	YES	COVISHEILD	45	Fever	No	NA	No	NILL	5.6	62	17.8	NO	YES	DAILY	7-8hrs	NO	YES	NONVEGETARIAN	URBAN	SINGLE	99.4	POSITIVE	6.53	POSITIVE	#N/A	#N/A	#N/A	#N/A
301	MUNEENDRA KOTAKONDA	Male	33	hospital support staff	O GROUP	Rh+VE	Hospital support staff	YES	COVISHEILD	30	Headache	YES	Mild	Yes	NILL	5.6	70	24.9	NO	NO	NONE	7-8hrs	NO	NO	NONVEGETARIAN	URBAN	NUCLAR	99.46	POSITIVE	19.28	POSITIVE	#N/A	#N/A	#N/A	#N/A
302	POTHULURU GOURABATHINI	Male	45	hospital support staff	O GROUP	Rh+VE	OTHERS	YES	COVISHEILD	60	Fever	No	NA	No	NILL	5.3	65	25.4	NO	YES	NONE	7-8hrs	NO	NO	VEGETARIAN	RURAL	NUCLAR	84.26	POSITIVE	3.72	POSITIVE	#N/A	#N/A	#N/A	#N/A
303	ANJI KUMAR GONDULURU	Male	25	hospital support staff	B GROUP	Rh+VE	Hospital support staff	YES	COVISHEILD	60	None	YES	Mild	Yes	NILL	5.6	84	29.9	NO	YES	NONE	7-8hrs	NO	NO	NONVEGETARIAN	URBAN	SINGLE	99.66	POSITIVE	8.23	POSITIVE	#N/A	#N/A	#N/A	#N/A
304	RADHIKA MUDDULURU	Female	47	CVT LAB TECHNICIAN	AB GROUP	Rh+VE	Laboratory Technician	YES	COVISHEILD	30	Headache	No	NA	No	NILL	5.2	50	20.2	NO	NO	NONE	7-8hrs	NO	NO	VEGETARIAN	URBAN	NUCLAR	21.93	NEGATIVE	1.43	NEGATIVE	98.5652	POSITIVE	48.2509	POSITIVE
305	PRADEEP KUMAR SIRIVELU	Male	38	PA	O GROUP	Rh+VE	Svims Administrative Staff	YES	COVISHEILD	84	None	No	NA	No	NILL	5.8	101	33.9	NO	YES	DAILY	7-8hrs	NO	NO	NONVEGETARIAN	URBAN	NUCLAR	99.67	POSITIVE	16.42	POSITIVE	#N/A	#N/A	#N/A	#N/A
306	BALA SUBRAMANYAM CHIGURAM	Male	40	PA	Unknown	UNKNOWN	Svims Administrative Staff	YES	COVISHEILD	60	Headache, Myalgia	No	NA	No	NILL	5.6	60	21.3	NO	YES	DAILY	7-8hrs	NO	NO	NONVEGETARIAN	URBAN	NUCLAR	99.64	POSITIVE	10.54	POSITIVE	#N/A	#N/A	#N/A	#N/A
307	MANOJ VELUKU THULASIRAM	Male	38	PA	O GROUP	Rh+VE	Svims Administrative Staff	YES	Covaxin	45	Fever, Headache, Myalgia, Irritability	YES	Mild	No	NILL	5.11	90	27.7	NO	YES	WEEKLY	7-8hrs	NO	NO	NONVEGETARIAN	URBAN	NUCLAR	93.4	POSITIVE	12.61	POSITIVE	#N/A	#N/A	#N/A	#N/A
308	GIRISH NAG RAYALACHARLA	Male	22	STUDENT	B GROUP	Rh+VE	OTHERS	YES	COVISHEILD	42	Fever, Headache	No	NA	No	NILL	5.8	68	22.8	NO	NO	DAILY	7-8hrs	NO	NO	NONVEGETARIAN	URBAN	SINGLE	99.63	POSITIVE	12.05	POSITIVE	#N/A	#N/A	#N/A	#N/A
309	SHANKAR MADDU	Male	34	PG	O GROUP	Rh+VE	Researchers	YES	COVISHEILD	32	Myalgia	No	NA	No	NILL	5.6	72	25.6	NO	YES	DAILY	< 7hrs	NO	NO	NONVEGETARIAN	URBAN	SINGLE	98.03	POSITIVE	7.98	POSITIVE	#N/A	#N/A	#N/A	#N/A
310	SREE HARI GUKANTI	Male	34	PA	O GROUP	Rh+VE	Svims Administrative Staff	YES	COVISHEILD	32	Myalgia, Fever	No	NA	No	NILL	6	73	21.8	NO	NO	NONE	7-8hrs	NO	NO	NONVEGETARIAN	URBAN	NUCLAR	98.65	POSITIVE	6.29	POSITIVE	#N/A	#N/A	#N/A	#N/A
311	Mohan Uppara	Male	54	CVT	O GROUP	Rh+VE	Laboratory Technician	YES	COVISHEILD	28	Fever, Headache, Myalgia, Irritability	No	NA	No	NILL	5.6	70	24.9	NO	NO	NONE	< 7hrs	YES	NO	VEGETARIAN	URBAN	NUCLAR	27.39	NEGATIVE	1.29	NEGATIVE	#N/A	#N/A	#N/A	#N/A
312	LAKSHMI PRASANNA Maccha	Female	35	ECG & CVT	A GROUP	Rh+VE	Laboratory Technician	YES	COVISHEILD	28	Fever	No	NA	No	NILL	5.2	70	28.2	NO	NO	DAILY	7-8hrs	NO	NO	NONVEGETARIAN	URBAN	NUCLAR	40.43	NEGATIVE	1.31	NEGATIVE	98.2616	POSITIVE	45.9614	POSITIVE
313	RAJENDAR ADHICHARALA	Male	33	DM ORTHO	B GROUP	Rh+VE	Doctor/Clinician	YES	Covaxin	62	None	No	NA	No	NILL	5.7	74	25.6	NO	NO	NONE	< 7hrs	NO	YES	NONVEGETARIAN	URBAN	SINGLE	57.98	POSITIVE	2.84	POSITIVE	#N/A	#N/A	#N/A	#N/A
314	VAMSHI CHANDRA RAJU DUSHA	Male	29	DM ORTHO	B GROUP	Rh+VE	Doctor/Clinician	YES	Covaxin	62	None	YES	Mild	Yes	NILL	5.8	74	24.8	NO	YES	WEEKLY	< 7hrs	NO	YES	NONVEGETARIAN	URBAN	SINGLE	97.81	POSITIVE	15.45	POSITIVE	#N/A	#N/A	#N/A	#N/A
315	MOHAN GUMMADI	Male	35	DEO	B GROUP	Rh+VE	Svims Administrative Staff	YES	COVISHEILD	28	Fever	No	NA	No	NILL	5.8	70	23.5	NO	NO	WEEKLY	7-8hrs	NO	NO	VEGETARIAN	URBAN	NUCLAR	98.85	POSITIVE	8.08	POSITIVE	#N/A	#N/A	#N/A	#N/A
316	BABU JALADANKI	Male	38	DEO	B GROUP	Rh+VE	Svims Administrative Staff	YES	COVISHEILD	41	Fever	No	NA	No	NILL	5.8	75	25.1	NO	NO	DAILY	7-8hrs	NO	NO	NONVEGETARIAN	URBAN	NUCLAR	24.87	NEGATIVE	0.6	NEGATIVE	#N/A	#N/A	#N/A	#N/A
317	HARI KRISHNA KONANGI	Male	38	DEO	O GROUP	Rh+VE	Svims Administrative Staff	YES	COVISHEILD	45	None	No	NA	No	NILL	5.6	75	26.7	NO	NO	DAILY	7-8hrs	NO	NO	NONVEGETARIAN	URBAN	NUCLAR	69.96	POSITIVE	1.23	NEGATIVE	96.5547	POSITIVE	47.7327	POSITIVE
318	JANAKI RAM THANDURI	Male	30	DEO	O GROUP	Rh+VE	Svims Administrative Staff	YES	COVISHEILD	33	Headache	No	NA	No	NILL	5.9	70	22.8	NO	YES	NONE	7-8hrs	NO	NO	NONVEGETARIAN	URBAN	NUCLAR	99.49	POSITIVE	11.95	POSITIVE	#N/A	#N/A	#N/A	#N/A
319	VIJAY KUMAR CHINNABATHINI	Male	48	SECURITY SUPERVISOR	O GROUP	Rh+VE	Hospital support staff	YES	COVISHEILD	84	None	No	NA	Yes	NILL	5.7	86	29.7	NO	NO	DAILY	< 7hrs	NO	NO	NONVEGETARIAN	URBAN	NUCLAR	99.63	POSITIVE	12.18	POSITIVE	#N/A	#N/A	#N/A	#N/A
320	KHALEEL BASHA SHAIK	Male	30	SECURITY GAURD	B GROUP	Rh+VE	Hospital support staff	YES	COVISHEILD	60	None	YES	Asymptomatic	Yes	NILL	6	92	27.5	NO	NO	NONE	< 7hrs	NO	NO	NONVEGETARIAN	URBAN	NUCLAR	99.44	POSITIVE	6.31	POSITIVE	94.5025	POSITIVE	33.7661	POSITIVE
321	JAYANTHI MUTTI	Female	35	ECG TECHNICIAN	B GROUP	Rh+VE	Laboratory Technician	YES	COVISHEILD	60	Fever, Headache	YES	Mild	Yes	NILL	4.6	64	34	NO	NO	NONE	7-8hrs	NO	NO	NONVEGETARIAN	URBAN	NUCLAR	99.54	POSITIVE	9.57	POSITIVE	#N/A	#N/A	#N/A	#N/A
322	GIRI BABU PAGADALA	Male	29	SECURITY GAURD	B GROUP	Rh+VE	Hospital support staff	YES	COVISHEILD	60	Headache, Myalgia	No	NA	No	NILL	5.7	65	22.4	NO	NO	NONE	7-8hrs	NO	NO	NONVEGETARIAN	URBAN	NUCLAR	97.75	POSITIVE	5.98	POSITIVE	#N/A	#N/A	#N/A	#N/A
323	NAGESWARA A	Male	40	SECURITY GAURD	O GROUP	Rh+VE	Hospital support staff	YES	COVISHEILD	30	Fever, Headache, Myalgia	No	NA	No	NILL	5.6	71	25.3	NO	YES	NONE	7-8hrs	NO	NO	NONVEGETARIAN	URBAN	NUCLAR	99.64	POSITIVE	14.3	POSITIVE	97.9851	POSITIVE	47.7327	POSITIVE
324	BALA RAM JANGAM	Male	49	SECURITY GAURD	Unknown	UNKNOWN	Hospital support staff	YES	COVISHEILD	84	None	YES	Mild	No	NILL	5.8	60	20.1	NO	NO	NONE	7-8hrs	NO	NO	NONVEGETARIAN	URBAN	NUCLAR	99.53	POSITIVE	18.1	POSITIVE	#N/A	#N/A	#N/A	#N/A
325	MARY SUSEELA DEVA PRIYAM	Female	56	HEAD NURSE	A GROUP	Rh+VE	Nurse	YES	COVISHEILD	60	Fever, Headache, Myalgia	No	NA	Yes	NILL	5	52	22.4	NO	NO	NONE	< 7hrs	YES	NO	NONVEGETARIAN	URBAN	NUCLAR	99.55	POSITIVE	14.19	POSITIVE	#N/A	#N/A	#N/A	#N/A
326	SIVA JYOTHI SURATI	Female	28	STAFF NURSE	O GROUP	Rh+VE	Nurse	YES	COVISHEILD	42	Fever, Headache, Myalgia, Irritability	No	NA	Yes	NILL	5.4	56	21.2	NO	NO	NONE	< 7hrs	NO	NO	NONVEGETARIAN	URBAN	SINGLE	99.64	POSITIVE	12.48	POSITIVE	#N/A	#N/A	#N/A	#N/A
327	VINOD KUMAR BHUKYA	Male	34	ECG TECHNICIAN	B GROUP	Rh+VE	Laboratory Technician	YES	COVISHEILD	34	None	No	NA	Yes	NILL	5.8	76	25.5	NO	NO	DAILY	7-8hrs	NO	NO	NONVEGETARIAN	URBAN	NUCLAR	96.43	POSITIVE	5.96	POSITIVE	#N/A	#N/A	#N/A	#N/A
328	MOHANA KUMARI PATURU	Female	39	SECURITY GAURD	B GROUP	Rh+VE	Hospital support staff	YES	COVISHEILD	32	Fever, Headache, Myalgia, Irritability	YES	Mild	No	NILL	5.2	78	31.5	NO	NO	NONE	7-8hrs	NO	NO	NONVEGETARIAN	URBAN	NUCLAR	99.57	POSITIVE	11.99	POSITIVE	#N/A	#N/A	#N/A	#N/A
329	KRISHNAVENI G	Female	43	SECURITY GAURD	O GROUP	Rh+VE	Hospital support staff	YES	Covaxin	36	Headache, Myalgia	No	NA	No	NILL	5.6	65	23.1	NO	NO	NONE	7-8hrs	NO	NO	NONVEGETARIAN	URBAN	NUCLAR	99.16	POSITIVE	8.85	POSITIVE	#N/A	#N/A	#N/A	#N/A
330	ARUNA KUMARI VUPPUTURU	Female	52	HEAD NURSE	O GROUP	Rh+VE	Nurse	YES	COVISHEILD	84	None	YES	Mild	Yes	NILL	5.4	60	22.7	NO	NO	DAILY	7-8hrs	NO	NO	VEGETARIAN	URBAN	NUCLAR	75.43	POSITIVE	6.32	POSITIVE	#N/A	#N/A	#N/A	#N/A
331	KALAVATHI DASARI	Female	52	HEAD NURSE	O GROUP	Rh+VE	Nurse	YES	COVISHEILD	84	Irritability	YES	Moderate	Yes	NILL	5.5	75	27.5	NO	NO	NONE	7-8hrs	YES	NO	NONVEGETARIAN	URBAN	NUCLAR	99.58	POSITIVE	13.03	POSITIVE	#N/A	#N/A	#N/A	#N/A
332	SURESH PODIMEKALA	Male	34	DIALYSIS TECHNICIAN	AB GROUP	Rh+VE	Laboratory Technician	YES	COVISHEILD	45	Fever, Myalgia	No	NA	Yes	NILL	5.8	80	26.8	NO	NO	WEEKLY	7-8hrs	NO	NO	NONVEGETARIAN	URBAN	NUCLAR	82	POSITIVE	4.75	POSITIVE	#N/A	#N/A	#N/A	#N/A
333	SREE VIDYA KORAKUTI	Female	40	LAB TECHNICIAN	O GROUP	Rh-VE	Laboratory Technician	YES	COVISHEILD	60	Fever	No	NA	Yes	NILL	5.4	68	25.7	NO	NO	DAILY	< 7hrs	NO	NO	NONVEGETARIAN	URBAN	NUCLAR	81.53	POSITIVE	3.46	POSITIVE	#N/A	#N/A	#N/A	#N/A
334	RAMA DEVI TANGUTOORI	Female	50	STAFF NURSE	B GROUP	Rh+VE	Nurse	YES	COVISHEILD	28	None	No	NA	Yes	NILL	5.2	63	25.4	NO	NO	NONE	< 7hrs	NO	NO	NONVEGETARIAN	URBAN	NUCLAR	99.45	POSITIVE	11.72	POSITIVE	#N/A	#N/A	#N/A	#N/A
335	HARITHA LEPAKULA	Female	52	HEAD NURSE	O GROUP	Rh+VE	Nurse	YES	COVISHEILD	32	Myalgia, Headache	No	NA	Yes	NILL	5.4	63	23.8	NO	NO	NONE	7-8hrs	YES	NO	NONVEGETARIAN	URBAN	NUCLAR	34.9	NEGATIVE	1.02	NEGATIVE	#N/A	#N/A	#N/A	#N/A
336	VAHEDE SHAIK	Female	59	HEAD NURSE	O GROUP	Rh+VE	Nurse	YES	Covaxin	36	None	No	NA	Yes	NILL	5.4	65	24.6	NO	NO	WEEKLY	< 7hrs	YES	YES	NONVEGETARIAN	URBAN	NUCLAR	38.05	NEGATIVE	3.78	POSITIVE	#N/A	#N/A	#N/A	#N/A
337	ANNAPURNA KOLLATHURU	Female	32	PA	B GROUP	Rh+VE	Svims Administrative Staff	YES	COVISHEILD	34	Headache, Fever	YES	Mild	No	NILL	5.6	79	28.1	NO	NO	NONE	7-8hrs	NO	NO	NONVEGETARIAN	URBAN	NUCLAR	99.57	POSITIVE	12.58	POSITIVE	#N/A	#N/A	#N/A	#N/A
338	SUNITHA CHANAMBATLA	Female	53	NURSING SUPERIDENT	A GROUP	Rh+VE	Nurse	YES	Covaxin	36	Irritability, Myalgia	YES	Mild	Yes	NILL	5.5	70	25.7	NO	NO	DAILY	< 7hrs	YES	YES	VEGETARIAN	URBAN	NUCLAR	98.44	POSITIVE	17.6	POSITIVE	#N/A	#N/A	#N/A	#N/A
339	SUJATHA MANDYAM	Female	50	HEAD NURSE	A GROUP	Rh+VE	Nurse	YES	COVISHEILD	36	Fever, Headache, Myalgia	No	NA	Yes	NILL	5.4	70	26.5	NO	NO	DAILY	7-8hrs	YES	YES	NONVEGETARIAN	URBAN	NUCLAR	38.25	NEGATIVE	0.92	NEGATIVE	#N/A	#N/A	#N/A	#N/A
340	REDDY KUMARI SAGABALA	Female	42	LAB TECHNICIAN	O GROUP	Rh+VE	Laboratory Technician	YES	COVISHEILD	84	Fever	YES	Mild	Yes	NILL	5.5	56	20.5	NO	NO	NONE	< 7hrs	NO	NO	NONVEGETARIAN	URBAN	NUCLAR	99.43	POSITIVE	10.25	POSITIVE	#N/A	#N/A	#N/A	#N/A
341	GEETHA BUKKE	Female	30	LAB TECHNICIAN	O GROUP	Rh+VE	Laboratory Technician	YES	COVISHEILD	84	Fever, Myalgia	No	NA	Yes	NILL	5.4	70	26.5	NO	NO	NONE	7-8hrs	NO	NO	NONVEGETARIAN	URBAN	NUCLAR	80.88	POSITIVE	3.51	POSITIVE	#N/A	#N/A	#N/A	#N/A
342	ELAANGO REDDY DAMODHAR	Male	51	SECURITY VIGILENCE OFFICER	A GROUP	Rh-VE	Hospital support staff	YES	COVISHEILD	32	Myalgia	No	NA	No	NILL	5.8	87	29.2	NO	NO	WEEKLY	7-8hrs	NO	NO	NONVEGETARIAN	URBAN	NUCLAR	60.31	POSITIVE	3.01	POSITIVE	#N/A	#N/A	#N/A	#N/A
343	VENKATESH MALLELA	Male	35	SECURITY GAURD	A GROUP	Rh+VE	Hospital support staff	YES	COVISHEILD	30	Fever, Myalgia	YES	Mild	No	NILL	6	78	23.3	NO	NO	NONE	7-8hrs	NO	NO	NONVEGETARIAN	URBAN	NUCLAR	97.41	POSITIVE	5.71	POSITIVE	#N/A	#N/A	#N/A	#N/A
344	SULOCHANA KANEPPAGARI	Female	37	STAFF NURSE	AB GROUP	Rh+VE	Nurse	YES	COVISHEILD	60	Myalgia, Irritability	No	NA	Yes	NILL	5.5	57	20.9	NO	NO	NONE	7-8hrs	NO	NO	NONVEGETARIAN	URBAN	NUCLAR	96.41	POSITIVE	5.97	POSITIVE	#N/A	#N/A	#N/A	#N/A
345	LAKSHMI DEVI PULIMADUGU	Female	54	MATRON	O GROUP	Rh+VE	OTHERS	YES	COVISHEILD	30	None	No	NA	No	NILL	5.2	80	32.3	NO	NO	NONE	7-8hrs	NO	NO	NONVEGETARIAN	URBAN	NUCLAR	39.61	NEGATIVE	1.15	NEGATIVE	#N/A	#N/A	#N/A	#N/A
346	KOMALA SURISETTY	Female	30	MATRON	O GROUP	Rh+VE	OTHERS	YES	COVISHEILD	30	None	No	NA	No	NILL	5.2	45	18.1	NO	NO	NONE	7-8hrs	NO	NO	VEGETARIAN	URBAN	NUCLAR	99.09	POSITIVE	9.93	POSITIVE	#N/A	#N/A	#N/A	#N/A
347	RAJESH BABU P.K	Male	43	DRIVER	B GROUP	Rh+VE	OTHERS	YES	COVISHEILD	35	None	No	NA	No	NILL	5.7	77	26.6	NO	NO	DAILY	7-8hrs	NO	NO	NONVEGETARIAN	URBAN	NUCLAR	99.58	POSITIVE	10.3	POSITIVE	88.1592	POSITIVE	33.8389	POSITIVE
348	GURU LOKESH AKASAM	Male	23	RENAL TRANSPLANTATION	B GROUP	Rh+VE	Laboratory Technician	YES	Covaxin	94	None	YES	Mild	Yes	NILL	5.4	65	24.6	NO	NO	DAILY	7-8hrs	NO	NO	NONVEGETARIAN	URBAN	SINGLE	98.79	POSITIVE	30.66	POSITIVE	#N/A	#N/A	#N/A	#N/A
349	PADMANABHA REDDY PALLERI	Male	54	DRIVER	O GROUP	Rh+VE	OTHERS	YES	COVISHEILD	30	Myalgia	No	NA	No	NILL	5.8	105	35.2	NO	NO	DAILY	7-8hrs	NO	NO	NONVEGETARIAN	URBAN	NUCLAR	94.58	POSITIVE	5.02	POSITIVE	84.2786	POSITIVE	39.7601	POSITIVE
350	SAVITHRI ANJANEYULU	Female	53	HEAD NURSE	O GROUP	Rh+VE	Nurse	YES	COVISHEILD	32	Myalgia, Headache, Irritability	No	NA	Yes	NILL	5.2	72	29	NO	NO	WEEKLY	7-8hrs	NO	NO	NONVEGETARIAN	URBAN	NUCLAR	45.83	NEGATIVE	1.42	NEGATIVE	#N/A	#N/A	#N/A	#N/A
351	SARADHAMBA KANAKA REDDY	Female	53	HEAD NURSE	B GROUP	Rh+VE	Nurse	YES	COVISHEILD	30	Irritability, Myalgia, Headache, Fever	YES	Mild	Yes	NILL	5.2	67	27	NO	NO	DAILY	7-8hrs	YES	YES	NONVEGETARIAN	URBAN	NUCLAR	99.06	POSITIVE	6.41	POSITIVE	#N/A	#N/A	#N/A	#N/A
352	VIJAYA KUMARI REDDIVARI	Female	51	HEAD NURSE	O GROUP	Rh+VE	Nurse	YES	COVISHEILD	84	Irritability, Myalgia	YES	Mild	Yes	NILL	5.4	62	23.5	NO	NO	DAILY	7-8hrs	YES	YES	NONVEGETARIAN	URBAN	NUCLAR	99.6	POSITIVE	18.91	POSITIVE	#N/A	#N/A	#N/A	#N/A
353	NAGA LAKSHMI KATTELA	Female	48	ANM	B GROUP	Rh+VE	Nurse	YES	COVISHEILD	84	Myalgia, Fever, Irritability	YES	Severe	Yes	NILL	5.8	66	22.1	NO	NO	NONE	7-8hrs	YES	YES	NONVEGETARIAN	URBAN	NUCLAR	99.53	POSITIVE	13.62	POSITIVE	#N/A	#N/A	#N/A	#N/A
354	KUMARI T	Female	34	STAFF NURSE	O GROUP	Rh+VE	Nurse	YES	COVISHEILD	42	Myalgia, Irritability	No	NA	Yes	NILL	5.4	56	21.2	NO	NO	DAILY	< 7hrs	NO	NO	NONVEGETARIAN	URBAN	NUCLAR	99.37	POSITIVE	7.93	POSITIVE	#N/A	#N/A	#N/A	#N/A
355	PRAMEELA BYREDDY	Female	46	STAFF NURSE	O GROUP	Rh+VE	Nurse	YES	COVISHEILD	NA	Myalgia, Headache, Fever, Irritability	YES	Moderate	Yes	NILL	5.8	68	22.8	NO	NO	WEEKLY	< 7hrs	YES	NO	NONVEGETARIAN	URBAN	NUCLAR	99.49	POSITIVE	9.73	POSITIVE	#N/A	#N/A	#N/A	#N/A
356	MUDDU KRISHNA POLURU	Male	44	ANEASTHISIA TECHNICIAN	O GROUP	Rh+VE	Laboratory Technician	YES	COVISHEILD	32	Fever, Headache, Myalgia	No	NA	Yes	NILL	6	73	21.8	NO	NO	DAILY	< 7hrs	YES	YES	NONVEGETARIAN	URBAN	NUCLAR	99.08	POSITIVE	6.55	POSITIVE	#N/A	#N/A	#N/A	#N/A
357	ANITHA NAGALAPURAM	Female	40	LAB TECHNICIAN	B GROUP	Rh+VE	Laboratory Technician	YES	COVISHEILD	30	Fever, Myalgia	No	NA	Yes	NILL	5.6	61	21.7	NO	NO	NONE	7-8hrs	NO	NO	VEGETARIAN	URBAN	NUCLAR	90.41	POSITIVE	3.02	POSITIVE	#N/A	#N/A	#N/A	#N/A
358	REDDEMMA ASANAPURAM	Female	34	STAFF NURSE	B GROUP	Rh+VE	Nurse	YES	COVISHEILD	40	Myalgia	No	NA	Yes	NILL	5.2	38	15.3	NO	NO	NONE	7-8hrs	NO	NO	NONVEGETARIAN	URBAN	NUCLAR	98.97	POSITIVE	10.53	POSITIVE	#N/A	#N/A	#N/A	#N/A
359	SRAVANI PARADESI	Female	26	STAFF NURSE	O GROUP	Rh+VE	Nurse	YES	Covaxin	45	Myalgia	No	NA	Yes	NILL	5	45	19.4	NO	NO	WEEKLY	7-8hrs	NO	NO	NONVEGETARIAN	URBAN	NUCLAR	99.49	POSITIVE	11.42	POSITIVE	#N/A	#N/A	#N/A	#N/A
360	SUJATHA VADDIPALLE	Female	39	STAFF NURSE	AB GROUP	Rh+VE	Nurse	YES	COVISHEILD	84	Myalgia	No	NA	Yes	NILL	5.1	56	23.3	NO	NO	NONE	< 7hrs	NO	NO	NONVEGETARIAN	URBAN	NUCLAR	58.92	POSITIVE	1.47	NEGATIVE	#N/A	#N/A	#N/A	#N/A
361	AMARAVATHI ADDANKI	Female	30	STAFF NURSE	A GROUP	Rh+VE	Nurse	YES	COVISHEILD	84	Myalgia	No	NA	Yes	NILL	5.3	54	21.1	NO	NO	NONE	7-8hrs	NO	NO	NONVEGETARIAN	URBAN	NUCLAR	99.26	POSITIVE	12.38	POSITIVE	#N/A	#N/A	#N/A	#N/A
362	SASI KALA PEDDIPALLI	Female	28	STAFF NURSE	O GROUP	Rh+VE	Nurse	YES	COVISHEILD	84	Headache	No	NA	Yes	NILL	5.2	50	20.2	NO	NO	NONE	< 7hrs	NO	NO	NONVEGETARIAN	URBAN	NUCLAR	99.62	POSITIVE	11.2	POSITIVE	#N/A	#N/A	#N/A	#N/A
363	VENKATARATHNAMMA NATHANABOYINA	Female	40	STAFF NURSE	B GROUP	Rh+VE	Nurse	YES	COVISHEILD	84	None	No	NA	Yes	NILL	4.8	32	15.8	NO	NO	NONE	< 7hrs	NO	NO	NONVEGETARIAN	URBAN	NUCLAR	99.24	POSITIVE	17.88	POSITIVE	#N/A	#N/A	#N/A	#N/A
364	LAKSHMI V	Female	45	WORKER	Unknown	UNKNOWN	Multipurpose worker	YES	COVISHEILD	84	Irritability	No	NA	Yes	NILL	5.4	77	29.1	NO	NO	DAILY	7-8hrs	NO	NO	NONVEGETARIAN	URBAN	NUCLAR	99.51	POSITIVE	13.46	POSITIVE	#N/A	#N/A	#N/A	#N/A
365	SAYAMMA THOTA	Female	40	STAFF NURSE	Unknown	UNKNOWN	Nurse	YES	COVISHEILD	84	Irritability, Myalgia	No	NA	Yes	NILL	5.6	68	24.2	NO	NO	NONE	7-8hrs	NO	NO	NONVEGETARIAN	URBAN	NUCLAR	97.15	POSITIVE	8.18	POSITIVE	#N/A	#N/A	#N/A	#N/A
366	STELLA MARY KANAKARAJ	Female	58	ANM	O GROUP	Rh+VE	Nurse	YES	COVISHEILD	30	None	No	NA	Yes	NILL	4.8	60	29.7	NO	NO	DAILY	< 7hrs	NO	YES	NONVEGETARIAN	URBAN	NUCLAR	83.06	POSITIVE	2.36	POSITIVE	#N/A	#N/A	#N/A	#N/A
367	SHOBHA RANI KOLAR	Female	34	LAB TECHNICIAN	B GROUP	Rh+VE	Laboratory Technician	YES	COVISHEILD	84	Fever,Headache,Myalgia Irritability	No	NA	Yes	NILL	5	50	21.5	NO	NO	NONE	< 7hrs	NO	NO	NONVEGETARIAN	URBAN	NUCLAR	77.63	POSITIVE	2.24	POSITIVE	#N/A	#N/A	#N/A	#N/A
368	SHALINI V S	Female	27	LAB TECHNICIAN	O GROUP	Rh+VE	Laboratory Technician	YES	COVISHEILD	30	None	No	NA	Yes	NILL	3	40	47.8	NO	NO	NONE	7-8hrs	NO	NO	NONVEGETARIAN	URBAN	SINGLE	74.35	POSITIVE	2.43	POSITIVE	#N/A	#N/A	#N/A	#N/A
369	LAKSHMI DEVI ARPIREDDY	Female	58	HEAD NURSE	A GROUP	Rh+VE	Nurse	YES	COVISHEILD	32	Fever, Myalgia	No	NA	Yes	NILL	5.6	67	23.8	NO	NO	NONE	< 7hrs	NO	NO	NONVEGETARIAN	URBAN	NUCLAR	99.45	POSITIVE	10.35	POSITIVE	#N/A	#N/A	#N/A	#N/A
370	HARI PRASAD BALLAPALLI	Male	44	DOCTOR	O GROUP	Rh+VE	Doctor/Clinician	YES	COVISHEILD	48	Fever, Myalgia	YES	Mild	Yes	NILL	5.7	90	31.1	NO	NO	DAILY	< 7hrs	YES	NO	NONVEGETARIAN	URBAN	NUCLAR	99.24	POSITIVE	8.34	POSITIVE	#N/A	#N/A	#N/A	#N/A
371	GIRI BABU NANDYALA	Male	42	ATTENDER	A GROUP	Rh-VE	Hospital support staff	YES	COVISHEILD	32	Myalgia	YES	Mild	No	NILL	5.5	75	28	NO	YES	DAILY	7-8hrs	NO	NO	NONVEGETARIAN	URBAN	NUCLAR	99.6	POSITIVE	10.93	POSITIVE	#N/A	#N/A	#N/A	#N/A
372	THRIPOORNA	Female	23	DEO	Unknown	UNKNOWN	OTHERS	YES	COVISHEILD	32	Fever	No	NA	No	NILL	5.4	54	20.4	NO	NO	NONE	7-8hrs	NO	NO	NONVEGETARIAN	URBAN	SINGLE	96.46	POSITIVE	5.68	POSITIVE	#N/A	#N/A	#N/A	#N/A
373	MUNIRAJAMMA CHITHAMANU	Female	43	STAFF NURSE	Unknown	UNKNOWN	Nurse	YES	COVISHEILD	60	None	YES	Mild	Yes	NILL	5	60	25.8	NO	NO	DAILY	7-8hrs	NO	NO	NONVEGETARIAN	URBAN	NUCLAR	99.67	POSITIVE	13.6	POSITIVE	#N/A	#N/A	#N/A	#N/A
374	SHANTHI PASALA	Female	37	WARD BOY	Unknown	UNKNOWN	OTHERS	YES	Covaxin	NA	None	No	NA	No	NILL	5.2	55	22.2	NO	NO	DAILY	< 7hrs	NO	NO	NONVEGETARIAN	RURAL	NUCLAR	99.52	POSITIVE	10.66	POSITIVE	#N/A	#N/A	#N/A	#N/A
375	DUDDELA NAGAMANI	Female	45	PA	B GROUP	Rh+VE	Svims Administrative Staff	YES	COVISHEILD	84	None	No	NA	No	NILL	5.8	65	21.8	NO	NO	NONE	7-8hrs	NO	NO	NONVEGETARIAN	URBAN	NUCLAR	99.62	POSITIVE	24.4	POSITIVE	91.194	POSITIVE	28.8031	POSITIVE
376	VADDIPALLI SEKHAR	Male	36	OT ASSISTANT	AB GROUP	Rh+VE	Hospital support staff	YES	COVISHEILD	84	None	No	NA	No	NILL	5.6	83	29.5	NO	NO	NONE	< 7hrs	NO	NO	NONVEGETARIAN	RURAL	NUCLAR	86.58	POSITIVE	4.84	POSITIVE	#N/A	#N/A	#N/A	#N/A
377	SANGEETHAM SUJATHA	Female	39	STAFF NURSE	O GROUP	Rh+VE	Nurse	YES	Covaxin	35	None	YES	Mild	No	NILL	5.4	52	19.7	NO	NO	NONE	< 7hrs	NO	NO	NONVEGETARIAN	URBAN	NUCLAR	98.82	POSITIVE	24.71	POSITIVE	#N/A	#N/A	#N/A	#N/A
378	BONDAKAYALA MADHU BABU	Male	40	PA	A GROUP	Rh+VE	Svims Administrative Staff	YES	COVISHEILD	60	Fever, Myalgia	No	NA	No	NILL	5.9	88	28.6	NO	NO	DAILY	7-8hrs	NO	NO	NONVEGETARIAN	URBAN	NUCLAR	42.39	NEGATIVE	2.48	POSITIVE	#N/A	#N/A	#N/A	#N/A
379	KURMAYAGARI BHASKAR REDDY	Male	69	DOCTOR	B GROUP	Rh+VE	Doctor/Clinician	YES	COVISHEILD	28	Myalgia	No	NA	No	NILL	5.1	72	30	NO	NO	DAILY	< 7hrs	NO	NO	NONVEGETARIAN	URBAN	NUCLAR	61.56	POSITIVE	1.29	NEGATIVE	90.3483	POSITIVE	16.6002	POSITIVE
380	KONGANI JYOTHI PRASD	Male	42	DOCTOR	O GROUP	Rh+VE	Doctor/Clinician	YES	COVISHEILD	28	None	YES	Mild	Yes	NILL	5.3	80	31.2	NO	YES	DAILY	< 7hrs	NO	NO	NONVEGETARIAN	URBAN	NUCLAR	99.63	POSITIVE	11.21	POSITIVE	#N/A	#N/A	#N/A	#N/A
381	LOKANADHAM THANUJA	Female	35	RADIOGRAPHER	B GROUP	Rh+VE	Hospital support staff	YES	COVISHEILD	40	Fever	No	NA	No	NILL	4.8	66	32.6	NO	NO	DAILY	7-8hrs	NO	NO	NONVEGETARIAN	URBAN	NUCLAR	96.72	POSITIVE	5.6	POSITIVE	93.893	POSITIVE	43.2124	POSITIVE
382	KOTESWARA	Male	37	MRD. TECHNICIAN	B GROUP	Rh+VE	Laboratory Technician	YES	COVISHEILD	60	None	No	NA	No	NILL	5.6	65	23.1	NO	YES	DAILY	< 7hrs	NO	NO	NONVEGETARIAN	URBAN	NUCLAR	99.62	POSITIVE	25.42	POSITIVE	#N/A	#N/A	#N/A	#N/A
383	UMAPATHI	Male	36	LAB TECHNICIAN	O GROUP	Rh+VE	Laboratory Technician	YES	COVISHEILD	45	Fever	No	NA	Yes	NILL	5.2	70	28.2	NO	NO	WEEKLY	7-8hrs	YES	NO	NONVEGETARIAN	URBAN	NUCLAR	87.52	POSITIVE	2.22	POSITIVE	#N/A	#N/A	#N/A	#N/A
384	SAILAJA	Female	55	HEAD NURSE	B GROUP	Rh+VE	Nurse	YES	COVISHEILD	32	Fever,Myalgia,Headache	No	NA	Yes	NILL	5.7	75	25.9	NO	NO	NONE	< 7hrs	NO	NO	VEGETARIAN	URBAN	NUCLAR	97.98	POSITIVE	5.74	POSITIVE	#N/A	#N/A	#N/A	#N/A
385	REDDY VASANTHA	Female	52	HEAD NURSE	B GROUP	Rh+VE	Nurse	YES	COVISHEILD	28	Myalgia,Headache	No	NA	Yes	NILL	5.6	78	27.8	NO	NO	DAILY	< 7hrs	NO	NO	VEGETARIAN	URBAN	NUCLAR	99.35	POSITIVE	8.39	POSITIVE	#N/A	#N/A	#N/A	#N/A
386	NARAHARI	Male	55	WARDEN	AB GROUP	Rh+VE	OTHERS	YES	COVISHEILD	64	None	No	NA	No	NILL	5.6	65	23.1	NO	NO	NONE	7-8hrs	NO	NO	NONVEGETARIAN	URBAN	SINGLE	98.96	POSITIVE	9.84	POSITIVE	#N/A	#N/A	#N/A	#N/A
387	SUREKHA	Female	32	PA	B GROUP	Rh+VE	OTHERS	YES	COVISHEILD	45	Fever,Myalgia	No	NA	No	NILL	5	53	22.8	NO	NO	DAILY	< 7hrs	YES	NO	NONVEGETARIAN	URBAN	SINGLE	99.46	POSITIVE	7.56	POSITIVE	#N/A	#N/A	#N/A	#N/A
388	ROSAIAH	Male	30	PHARMACYST	B GROUP	Rh+VE	OTHERS	YES	COVISHEILD	43	None	No	NA	No	NILL	5.6	70	24.9	NO	NO	NONE	7-8hrs	NO	NO	NONVEGETARIAN	URBAN	SINGLE	99.22	POSITIVE	6.11	POSITIVE	#N/A	#N/A	#N/A	#N/A
389	SUBRAMANYAM RAJU	Male	54	PHARMACYST	B GROUP	Rh-VE	OTHERS	YES	COVISHEILD	45	None	No	NA	No	NILL	5.7	79	27.3	NO	NO	NONE	< 7hrs	YES	YES	NONVEGETARIAN	URBAN	NUCLAR	99.22	POSITIVE	17.53	POSITIVE	#N/A	#N/A	#N/A	#N/A
390	FLORENCE SELVAM	Female	56	HEAD NURSE	A GROUP	Rh+VE	Nurse	YES	COVISHEILD	28	Myalgia,Fever	YES	Mild	Yes	NILL	5.2	95	38.3	NO	NO	DAILY	< 7hrs	YES	NO	NONVEGETARIAN	URBAN	NUCLAR	99.71	POSITIVE	10.87	POSITIVE	#N/A	#N/A	#N/A	#N/A
391	NARESH	Male	30	PA	Unknown	UNKNOWN	OTHERS	YES	COVISHEILD	NA	None	YES	Mild	No	NILL	5.7	84	29	NO	NO	DAILY	< 7hrs	NO	NO	NONVEGETARIAN	URBAN	NUCLAR	99.69	POSITIVE	19.7	POSITIVE	#N/A	#N/A	#N/A	#N/A
392	MUNICHANDRAIAH	Male	42	SECURITY GAURD	Unknown	UNKNOWN	OTHERS	YES	COVISHEILD	NA	Fever	YES	Asymptomatic	No	NILL	5.7	63	21.8	NO	YES	NONE	< 7hrs	NO	NO	NONVEGETARIAN	URBAN	NUCLAR	99.96	POSITIVE	12.84	POSITIVE	#N/A	#N/A	#N/A	#N/A
393	GOPAL	Male	44	PA	AB GROUP	Rh+VE	OTHERS	YES	COVISHEILD	40	Fever	No	NA	No	NILL	5.7	78	26.9	NO	NO	NONE	< 7hrs	YES	YES	NONVEGETARIAN	URBAN	NUCLAR	74.38	POSITIVE	2.37	POSITIVE	#N/A	#N/A	#N/A	#N/A
394	MUNIKRISHNA NAIK	Male	28	LAB TECHNICIAN	O GROUP	Rh+VE	Laboratory Technician	YES	COVISHEILD	NA	Fever,Myalgia	YES	Asymptomatic	Yes	NILL	5.7	60	20.7	NO	NO	NONE	7-8hrs	NO	NO	NONVEGETARIAN	URBAN	NUCLAR	99.2	POSITIVE	7.78	POSITIVE	#N/A	#N/A	#N/A	#N/A
395	MALATHI	Female	51	HEAD NURSE	O GROUP	Rh+VE	Nurse	YES	COVISHEILD	59	None	No	NA	Yes	NILL	5.6	66	23.5	NO	NO	DAILY	< 7hrs	YES	YES	NONVEGETARIAN	URBAN	NUCLAR	60.59	POSITIVE	1.41	NEGATIVE	#N/A	#N/A	#N/A	#N/A
396	MANJULA	Female	45	STAFF NURSE	B GROUP	Rh+VE	Nurse	YES	COVISHEILD	55	None	No	NA	Yes	NILL	5.5	62	22.7	NO	NO	DAILY	< 7hrs	NO	NO	NONVEGETARIAN	URBAN	NUCLAR	99.04	POSITIVE	6.34	POSITIVE	#N/A	#N/A	#N/A	#N/A
397	MURALI KRISHNA	Male	48	M.R.O	B GROUP	Rh+VE	OTHERS	YES	COVISHEILD	45	Fever,Headache,Myalgia	YES	Asymptomatic	No	NILL	5.5	74	27.1	NO	YES	DAILY	7-8hrs	NO	NO	NONVEGETARIAN	URBAN	NUCLAR	99.16	POSITIVE	6.89	POSITIVE	#N/A	#N/A	#N/A	#N/A
398	SUBRAMANYAM	Male	43	WARD BOY	Unknown	UNKNOWN	OTHERS	YES	COVISHEILD	30	Fever,Myalgia	No	NA	Yes	NILL	5.6	65	23.1	NO	YES	NONE	7-8hrs	NO	NO	NONVEGETARIAN	URBAN	NUCLAR	90.76	POSITIVE	1.68	NEGATIVE	#N/A	#N/A	#N/A	#N/A
399	MANJUVANI	Female	42	STAFF NURSE	O GROUP	Rh+VE	Nurse	YES	COVISHEILD	55	Fever,Headache	No	NA	Yes	NILL	5.6	75	26.7	NO	NO	DAILY	< 7hrs	NO	NO	NONVEGETARIAN	URBAN	NUCLAR	54.24	POSITIVE	1.04	NEGATIVE	#N/A	#N/A	#N/A	#N/A
400	GRACE VICTORIA	Female	60	ANM	B GROUP	Rh+VE	Nurse	YES	Covaxin	60	None	No	NA	Yes	NILL	5.2	60	24.2	NO	NO	NONE	7-8hrs	NO	NO	NONVEGETARIAN	URBAN	NUCLAR	99.76	POSITIVE	8.37	POSITIVE	#N/A	#N/A	#N/A	#N/A
401	MANJULA	Female	50	STAFF NURSE	B GROUP	Rh+VE	Nurse	YES	COVISHEILD	32	None	No	NA	Yes	NILL	5.5	70	25.7	NO	NO	DAILY	7-8hrs	NO	NO	NONVEGETARIAN	URBAN	NUCLAR	99.33	POSITIVE	5.52	POSITIVE	#N/A	#N/A	#N/A	#N/A
402	MANASVI	Female	19	ANEASTHISIA	O GROUP	Rh-VE	OTHERS	YES	Covaxin	28	None	No	NA	No	NILL	5.2	58	23.4	NO	NO	DAILY	7-8hrs	NO	NO	NONVEGETARIAN	URBAN	NUCLAR	42.89	NEGATIVE	0.61	NEGATIVE	#N/A	#N/A	#N/A	#N/A
403	MURALIDHAR REDDY	Male	45	PA	Unknown	UNKNOWN	OTHERS	YES	COVISHEILD	33	Myalgia	No	NA	No	NILL	6	80	23.9	NO	NO	DAILY	7-8hrs	NO	NO	NONVEGETARIAN	URBAN	NUCLAR	84.18	POSITIVE	2.24	POSITIVE	#N/A	#N/A	#N/A	#N/A
404	ANUHYA REDDY	Female	23	LAB TECHNICIAN	B GROUP	Rh+VE	Laboratory Technician	YES	COVISHEILD	32	Fever,Headache,Myalgia	YES	Asymptomatic	Yes	NILL	5.6	53	18.9	NO	NO	NONE	< 7hrs	NO	NO	NONVEGETARIAN	URBAN	NUCLAR	98.85	POSITIVE	5.4	POSITIVE	#N/A	#N/A	#N/A	#N/A
405	DOLIKASREE	Female	23	LAB TECHNICIAN	A GROUP	Rh+VE	Laboratory Technician	YES	COVISHEILD	NA	Fever,Headache,Myalgia	No	NA	No	NILL	5.7	62	21.4	NO	NO	NONE	< 7hrs	NO	NO	NONVEGETARIAN	URBAN	NUCLAR	99.67	POSITIVE	10.15	POSITIVE	#N/A	#N/A	#N/A	#N/A
406	NAGAMANI	Female	25	STAFF NURSE	O GROUP	Rh+VE	Nurse	No	not vaccinated	na	None	No	NA	Yes	NILL	4.5	45	24.8	NO	NO	NONE	< 7hrs	NO	NO	NONVEGETARIAN	URBAN	NUCLAR	50.93	POSITIVE	1	NEGATIVE	#N/A	#N/A	#N/A	#N/A
407	KOMALA	Female	39	STAFF NURSE	A GROUP	Rh-VE	Nurse	YES	COVISHEILD	36	None	No	NA	Yes	NILL	5.5	50	18.3	NO	NO	NONE	7-8hrs	NO	NO	NONVEGETARIAN	URBAN	NUCLAR	52.21	POSITIVE	1	NEGATIVE	#N/A	#N/A	#N/A	#N/A
408	LAKSHMI	Female	43	WARD BOY	Unknown	UNKNOWN	OTHERS	YES	COVISHEILD	39	Headache,Fever	No	NA	No	NILL	5.6	65	23.1	NO	NO	NONE	7-8hrs	NO	NO	NONVEGETARIAN	URBAN	NUCLAR	59.23	POSITIVE	1.1	NEGATIVE	#N/A	#N/A	#N/A	#N/A
409	VARALAKSHMI	Female	30	WARD BOY	B GROUP	Rh+VE	OTHERS	YES	COVISHEILD	56	Myalgia,Headache,Fever	No	NA	Yes	NILL	5.6	80	28.5	NO	NO	NONE	7-8hrs	NO	NO	NONVEGETARIAN	URBAN	NUCLAR	97.6	POSITIVE	4.7	POSITIVE	#N/A	#N/A	#N/A	#N/A
410	REDDY NAGAMANI	Female	48	STAFF NURSE	A GROUP	Rh-VE	Nurse	YES	COVISHEILD	28	Fever,Headache	YES	Mild	Yes	NILL	5.5	70	25.7	NO	NO	DAILY	< 7hrs	YES	YES	NONVEGETARIAN	URBAN	NUCLAR	99.58	POSITIVE	11.49	POSITIVE	#N/A	#N/A	#N/A	#N/A
411	MUNEESWARI	Female	35	STAFF NURSE	B GROUP	Rh+VE	Nurse	YES	COVISHEILD	29	Headache	No	NA	Yes	NILL	5.6	78	27.8	NO	NO	DAILY	< 7hrs	YES	YES	NONVEGETARIAN	URBAN	NUCLAR	99.52	POSITIVE	7.93	POSITIVE	#N/A	#N/A	#N/A	#N/A
412	DHANALAKSHMI	Female	54	HEAD NURSE	O GROUP	Rh+VE	Nurse	YES	COVISHEILD	32	Myalgia,Headache	No	NA	Yes	NILL	5.2	64	25.8	NO	NO	WEEKLY	< 7hrs	YES	YES	VEGETARIAN	URBAN	NUCLAR	99.31	POSITIVE	9.88	POSITIVE	#N/A	#N/A	#N/A	#N/A
413	KUMAR RAJU	Male	36	PA	O GROUP	Rh+VE	OTHERS	YES	COVISHEILD	29	Myalgia,Headache	No	NA	No	NILL	5.6	84	29.9	NO	YES	NONE	< 7hrs	YES	YES	NONVEGETARIAN	URBAN	NUCLAR	57.06	POSITIVE	1.14	NEGATIVE	#N/A	#N/A	#N/A	#N/A
414	MOHANA RANI	Female	35	PA	A GROUP	Rh+VE	OTHERS	YES	COVISHEILD	29	None	YES	Mild	No	NILL	5.2	72	29	NO	NO	NONE	< 7hrs	YES	YES	NONVEGETARIAN	URBAN	NUCLAR	99.5	POSITIVE	8.63	POSITIVE	#N/A	#N/A	#N/A	#N/A
415	GOPINADHAN	Male	55	WARD BOY	B GROUP	Rh+VE	OTHERS	YES	COVISHEILD	75	None	No	NA	No	NILL	5.5	82	30.1	NO	NO	NONE	7-8hrs	NO	NO	NONVEGETARIAN	URBAN	NUCLAR	99.5	POSITIVE	9.76	POSITIVE	#N/A	#N/A	#N/A	#N/A
416	MUSTOORI	Female	29	STAFF NURSE	O GROUP	Rh+VE	Nurse	YES	COVISHEILD	28	Headache	YES	Mild	Yes	NILL	5.2	59	23.8	NO	NO	NONE	7-8hrs	NO	NO	NONVEGETARIAN	URBAN	NUCLAR	98.84	POSITIVE	6.01	POSITIVE	#N/A	#N/A	#N/A	#N/A
417	anitha	Female	25	STAFF NURSE	B GROUP	Rh+VE	Nurse	YES	COVISHEILD	28	None	No	NA	Yes	NILL	5	54	23.3	NO	NO	NONE	> 8hrs	NO	NO	NONVEGETARIAN	URBAN	NUCLAR	98.5	POSITIVE	9.16	POSITIVE	#N/A	#N/A	#N/A	#N/A
418	DEPURU	Female	34	STAFF NURSE	Unknown	UNKNOWN	Nurse	YES	COVISHEILD	28	Fever	No	NA	Yes	NILL	5.6	60	21.3	NO	NO	NONE	7-8hrs	NO	NO	NONVEGETARIAN	URBAN	NUCLAR	98.89	POSITIVE	6.42	POSITIVE	#N/A	#N/A	#N/A	#N/A
419	YANAMALA	Male	48	PA	B GROUP	Rh+VE	Svims Administrative Staff	YES	COVISHEILD	30	None	YES	Mild	No	NILL	5.6	62	22.1	NO	NO	NONE	7-8hrs	NO	NO	NONVEGETARIAN	URBAN	NUCLAR	99.49	POSITIVE	7.85	POSITIVE	#N/A	#N/A	#N/A	#N/A
420	PENUBAKU	Female	27	STAFF NURSE	B GROUP	Rh+VE	Nurse	YES	COVISHEILD	32	Headache,None	YES	Mild	Yes	NILL	5.3	54	21.1	NO	NO	DAILY	7-8hrs	NO	NO	NONVEGETARIAN	URBAN	NUCLAR	99.54	POSITIVE	17.96	POSITIVE	#N/A	#N/A	#N/A	#N/A
421	KAMATHAM	Female	22	STAFF NURSE	O GROUP	Rh+VE	Nurse	YES	COVISHEILD	NA	None	No	NA	Yes	NILL	5.3	38	14.8	NO	NO	DAILY	7-8hrs	NO	NO	NONVEGETARIAN	URBAN	SINGLE	76.84	POSITIVE	1.09	NEGATIVE	#N/A	#N/A	#N/A	#N/A
422	PAIDI	Male	34	PA	B GROUP	Rh+VE	OTHERS	YES	COVISHEILD	40	Fever,Headache,Myalgia	No	NA	No	NILL	5.6	78	27.8	NO	YES	DAILY	7-8hrs	NO	NO	NONVEGETARIAN	URBAN	NUCLAR	98.1	POSITIVE	6.76	POSITIVE	#N/A	#N/A	#N/A	#N/A
423	MUDIGOLAM REDDEPPA	Female	45	PA	B GROUP	Rh+VE	OTHERS	YES	COVISHEILD	40	Myalgia	No	NA	No	NILL	5.6	92	32.7	NO	NO	DAILY	< 7hrs	NO	NO	NONVEGETARIAN	URBAN	NUCLAR	99.38	POSITIVE	11.12	POSITIVE	#N/A	#N/A	#N/A	#N/A
424	BUGGA	Female	40	PA	O GROUP	Rh+VE	OTHERS	YES	COVISHEILD	28	Headache	No	NA	No	NILL	5.6	81	28.8	NO	NO	DAILY	7-8hrs	NO	NO	NONVEGETARIAN	URBAN	NUCLAR	99.55	POSITIVE	12.53	POSITIVE	#N/A	#N/A	#N/A	#N/A
425	RAYAVARAM	Male	42	DRIVER	AB GROUP	Rh+VE	OTHERS	YES	COVISHEILD	86	Myalgia	No	NA	No	NILL	5.6	58	20.6	NO	NO	DAILY	7-8hrs	YES	YES	NONVEGETARIAN	URBAN	NUCLAR	95.39	POSITIVE	18.23	POSITIVE	#N/A	#N/A	#N/A	#N/A
426	BOJJA	Male	54	SECURITY OFFICER	O GROUP	Rh+VE	OTHERS	YES	COVISHEILD	31	None	YES	Asymptomatic	No	NILL	5.6	75	26.7	NO	NO	DAILY	< 7hrs	NO	NO	NONVEGETARIAN	URBAN	NUCLAR	96.94	POSITIVE	5.78	POSITIVE	#N/A	#N/A	#N/A	#N/A
427	SINGU	Female	38	PA	Unknown	UNKNOWN	Svims Administrative Staff	YES	COVISHEILD	32	Fever,Headache	No	NA	Yes	NILL	4.9	48	22.9	NO	NO	NONE	< 7hrs	YES	NO	NONVEGETARIAN	RURAL	NUCLAR	99.62	POSITIVE	13.35	POSITIVE	#N/A	#N/A	#N/A	#N/A
428	CIRIVEL	Female	52	HEAD NURSE	O GROUP	Rh+VE	Nurse	YES	COVISHEILD	NA	Myalgia,Headache,Fever	No	NA	Yes	NILL	5.4	74	28	NO	NO	DAILY	< 7hrs	YES	YES	NONVEGETARIAN	URBAN	NUCLAR	99.59	POSITIVE	24.43	POSITIVE	#N/A	#N/A	#N/A	#N/A
429	APPINI	Female	34	STAFF NURSE	B GROUP	Rh+VE	Nurse	YES	COVISHEILD	NA	Fever,Headache,Myalgia	No	NA	Yes	NILL	5.2	45	18.1	NO	NO	DAILY	< 7hrs	NO	NO	NONVEGETARIAN	URBAN	NUCLAR	99.33	POSITIVE	14.37	POSITIVE	#N/A	#N/A	#N/A	#N/A
430	KURUGUNNDLA	Female	38	STAFF NURSE	A GROUP	Rh+VE	Nurse	YES	COVISHEILD	30	Fever,Headache,Myalgia	No	NA	Yes	NILL	5.5	73	26.8	NO	NO	DAILY	< 7hrs	YES	YES	NONVEGETARIAN	URBAN	NUCLAR	99.16	POSITIVE	12.35	POSITIVE	#N/A	#N/A	#N/A	#N/A
431	BEEGALA	Female	27	STAFF NURSE	O GROUP	Rh+VE	Nurse	YES	COVISHEILD	NA	Headache,Fever,Myalgia	No	NA	Yes	NILL	5.2	68	27.4	NO	NO	DAILY	< 7hrs	YES	YES	NONVEGETARIAN	RURAL	NUCLAR	99.46	POSITIVE	16.26	POSITIVE	#N/A	#N/A	#N/A	#N/A
432	PANTAPALLI	Female	32	STAFF NURSE	B GROUP	Rh+VE	Nurse	YES	COVISHEILD	30	Fever,Headache,Myalgia	YES	Mild	Yes	NILL	5.2	58	23.4	NO	NO	DAILY	< 7hrs	YES	YES	NONVEGETARIAN	URBAN	NUCLAR	97.33	POSITIVE	12.02	POSITIVE	#N/A	#N/A	#N/A	#N/A
433	AKKILIGUNTA	Female	39	STAFF NURSE	AB GROUP	Rh+VE	Nurse	YES	COVISHEILD	31	Headache	No	NA	Yes	NILL	5.2	57	23	NO	NO	DAILY	< 7hrs	YES	YES	NONVEGETARIAN	RURAL	NUCLAR	97.57	POSITIVE	9.25	POSITIVE	#N/A	#N/A	#N/A	#N/A
434	NARAGINTI	Female	42	STAFF NURSE	O GROUP	Rh+VE	Nurse	YES	COVISHEILD	30	None	YES	Moderate	Yes	NILL	5.5	74	27.1	NO	NO	DAILY	7-8hrs	YES	YES	NONVEGETARIAN	RURAL	NUCLAR	99.56	POSITIVE	20.47	POSITIVE	#N/A	#N/A	#N/A	#N/A
435	DASARI	Female	32	STAFF NURSE	O GROUP	Rh+VE	Nurse	YES	COVISHEILD	NA	Headache	No	NA	Yes	NILL	5.4	58	29.5	NO	NO	DAILY	< 7hrs	YES	YES	NONVEGETARIAN	URBAN	NUCLAR	99.1	POSITIVE	9.7	POSITIVE	#N/A	#N/A	#N/A	#N/A
436	KANDULA VENKATA	Male	50	DOCTOR	A GROUP	Rh+VE	Doctor/Clinician	YES	COVISHEILD	31	Headache,Fever,Myalgia	No	NA	Yes	NILL	5.7	74	25.6	NO	NO	NONE	7-8hrs	YES	YES	NONVEGETARIAN	URBAN	NUCLAR	13.39	NEGATIVE	1.53	NEGATIVE	#N/A	#N/A	#N/A	#N/A
437	PAVAN KUMAR	Male	35	ASSOCIATE PROFESSOR	O GROUP	Rh+VE	Doctor/Clinician	YES	COVISHEILD	38	Irritability,Myalgia,Headache,Fever	No	NA	Yes	NILL	5.4	61	23.1	NO	NO	WEEKLY	< 7hrs	YES	NO	VEGETARIAN	URBAN	SINGLE	28.89	NEGATIVE	2.08	POSITIVE	#N/A	#N/A	#N/A	#N/A
438	BHIMINENI	Male	39	DRIVER (G.M.OFFICE)	AB GROUP	Rh+VE	OTHERS	YES	COVISHEILD	36	Fever,Headache	YES	Mild	Yes	NILL	6.1	105	30.5	NO	NO	WEEKLY	7-8hrs	NO	NO	NONVEGETARIAN	RURAL	NUCLAR	98.56	POSITIVE	18.97	POSITIVE	#N/A	#N/A	#N/A	#N/A
439	KATARU	Male	33	DRIVER (G.M.OFFICE) TRANSPORT	O GROUP	Rh+VE	OTHERS	YES	COVISHEILD	28	None	YES	Moderate	Yes	NILL	5.7	59	20.4	NO	NO	NONE	7-8hrs	NO	NO	NONVEGETARIAN	URBAN	NUCLAR	98.83	POSITIVE	25.35	POSITIVE	92.5249	POSITIVE	41.6909	POSITIVE
440	POYHAGANTI	Male	31	WARD BOY	B GROUP	Rh+VE	OTHERS	YES	COVISHEILD	31	Fever	No	NA	Yes	NILL	5.6	65	23.1	NO	YES	WEEKLY	7-8hrs	NO	NO	NONVEGETARIAN	RURAL	NUCLAR	76.82	POSITIVE	2.35	POSITIVE	#N/A	#N/A	#N/A	#N/A
441	GANDHAM	Female	53	SUPERIDENT	B GROUP	Rh+VE	OTHERS	YES	COVISHEILD	29	None	No	NA	No	NILL	5.2	73	29.4	NO	NO	WEEKLY	< 7hrs	YES	YES	NONVEGETARIAN	URBAN	NUCLAR	86.23	POSITIVE	3.16	POSITIVE	#N/A	#N/A	#N/A	#N/A
442	MUVVALA	Female	29	PA	B GROUP	Rh+VE	OTHERS	YES	COVISHEILD	42	Myalgia	No	NA	No	NILL	5.2	50	20.2	NO	NO	NONE	7-8hrs	YES	YES	VEGETARIAN	URBAN	NUCLAR	86.53	POSITIVE	7.41	POSITIVE	#N/A	#N/A	#N/A	#N/A
443	PALAMANDA	Female	37	PA	AB GROUP	Rh+VE	OTHERS	YES	COVISHEILD	42	Fever	No	NA	No	NILL	5	53	22.8	NO	NO	NONE	7-8hrs	YES	YES	NONVEGETARIAN	URBAN	NUCLAR	98.89	POSITIVE	11.22	POSITIVE	#N/A	#N/A	#N/A	#N/A
444	PUTALAPATTU	Female	31	PA	Unknown	UNKNOWN	OTHERS	YES	COVISHEILD	42	Fever	No	NA	No	NILL	5.3	45	17.6	NO	NO	NONE	7-8hrs	YES	YES	NONVEGETARIAN	URBAN	NUCLAR	99.32	POSITIVE	11.91	POSITIVE	#N/A	#N/A	#N/A	#N/A
445	VADANAPALLE	Male	38	DOCTOR	A GROUP	Rh+VE	Doctor/Clinician	YES	COVISHEILD	NA	None	No	NA	Yes	NILL	5.6	82	29.2	NO	NO	DAILY	7-8hrs	YES	YES	NONVEGETARIAN	URBAN	NUCLAR	99.57	POSITIVE	22.66	POSITIVE	#N/A	#N/A	#N/A	#N/A
446	PENUBADI	Male	30	DOCTOR	O GROUP	Rh+VE	Doctor/Clinician	No	not vaccinated	na	None	YES	Mild	Yes	NILL	5.6	75	26.7	NO	NO	WEEKLY	7-8hrs	NO	NO	NONVEGETARIAN	URBAN	SINGLE	82.92	POSITIVE	6.31	POSITIVE	95.59	POSITIVE	41.21	POSITIVE
447	PALAMANDA	Male	32	PHARMACIST	B GROUP	Rh+VE	Hospital support staff	YES	COVISHEILD	NA	None	No	NA	No	NILL	5.5	56	20.5	NO	NO	NONE	7-8hrs	NO	NO	NONVEGETARIAN	URBAN	NUCLAR	98.86	POSITIVE	12.3	POSITIVE	#N/A	#N/A	#N/A	#N/A
448	GODUGUCHINTA	Male	49	SECURITY GAURD	O GROUP	Rh+VE	OTHERS	YES	COVISHEILD	NA	None	No	NA	No	NILL	5.6	62	22.1	YES	YES	WEEKLY	7-8hrs	NO	NO	NONVEGETARIAN	URBAN	NUCLAR	99.43	POSITIVE	12.16	POSITIVE	#N/A	#N/A	#N/A	#N/A
449	DOMMARAJU	Female	25	DOCTOR	A GROUP	Rh+VE	Doctor/Clinician	YES	COVISHEILD	30	Fever,Myalgia	No	NA	Yes	NILL	5.1	48	20	NO	NO	WEEKLY	7-8hrs	NO	NO	NONVEGETARIAN	URBAN	NUCLAR	91.6	POSITIVE	5.14	POSITIVE	#N/A	#N/A	#N/A	#N/A
450	VIPPARLA	Female	26	DOCTOR	O GROUP	Rh+VE	Doctor/Clinician	YES	COVISHEILD	85	Headache	No	NA	Yes	NILL	5.4	74	28	NO	NO	WEEKLY	7-8hrs	NO	NO	NONVEGETARIAN	URBAN	NUCLAR	98.75	POSITIVE	11.3	POSITIVE	#N/A	#N/A	#N/A	#N/A
451	SRIGIRI	Female	27	DOCTOR	O GROUP	Rh+VE	Doctor/Clinician	YES	COVISHEILD	NA	Headache,Fever	No	NA	Yes	NILL	5.4	85	32.2	NO	NO	NONE	7-8hrs	YES	YES	NONVEGETARIAN	URBAN	NUCLAR	80.9	POSITIVE	5.12	POSITIVE	#N/A	#N/A	#N/A	#N/A
452	MUNDLA	Male	29	DOCTOR	AB GROUP	Rh+VE	Doctor/Clinician	YES	COVISHEILD	NA	None	No	NA	Yes	NILL	5.6	65	23.1	NO	YES	NONE	7-8hrs	YES	YES	NONVEGETARIAN	URBAN	NUCLAR	99.79	POSITIVE	17.55	POSITIVE	#N/A	#N/A	#N/A	#N/A
453	BUNGA	Male	28	DOCTOR	A GROUP	Rh+VE	Doctor/Clinician	No	not vaccinated	na	None	No	NA	Yes	NILL	5.3	50	19.5	NO	NO	WEEKLY	< 7hrs	NO	NO	NONVEGETARIAN	URBAN	NUCLAR	29.71	NEGATIVE	1.6	NEGATIVE	#N/A	#N/A	#N/A	#N/A
454	TUGURU	Male	26	DOCTOR	O GROUP	Rh+VE	Doctor/Clinician	YES	Covaxin	45	None	No	NA	Yes	NILL	5.8	69	23.1	NO	NO	WEEKLY	< 7hrs	YES	YES	NONVEGETARIAN	URBAN	NUCLAR	91.31	POSITIVE	9.03	POSITIVE	#N/A	#N/A	#N/A	#N/A
455	GORANTLA	Female	58	HEAD NURSE	A GROUP	Rh+VE	Nurse	YES	Covaxin	45	None	No	NA	No	NILL	5.5	70	25.7	NO	NO	DAILY	7-8hrs	NO	NO	NONVEGETARIAN	URBAN	NUCLAR	98.32	POSITIVE	24.97	POSITIVE	#N/A	#N/A	#N/A	#N/A
456	TARUGU	Male	22	LAB TECHNICIAN	AB GROUP	Rh+VE	Laboratory Technician	YES	Covaxin	41	None	No	NA	No	NILL	5.7	65	22.4	NO	NO	DAILY	7-8hrs	NO	NO	NONVEGETARIAN	URBAN	NUCLAR	51.13	POSITIVE	10.05	POSITIVE	#N/A	#N/A	#N/A	#N/A
457	TARUGU	Male	49	LAB TECHNICIAN	A GROUP	Rh+VE	Laboratory Technician	YES	Covaxin	60	None	No	NA	No	NILL	5.7	71	24.5	NO	NO	DAILY	7-8hrs	YES	NO	NONVEGETARIAN	URBAN	NUCLAR	27.74	NEGATIVE	2.54	POSITIVE	#N/A	#N/A	#N/A	#N/A
458	PASEUM	Female	22	LAB TECHNICIAN	O GROUP	Rh-VE	Laboratory Technician	YES	COVISHEILD	NA	Headache,Fever	YES	Severe	Yes	NILL	4.8	38	18.8	NO	NO	DAILY	7-8hrs	NO	NO	NONVEGETARIAN	URBAN	SINGLE	99.16	POSITIVE	10.69	POSITIVE	#N/A	#N/A	#N/A	#N/A
459	ANDI RAMACHANDRA	Female	21	LAB TECHNICIAN	AB GROUP	Rh+VE	Laboratory Technician	YES	COVISHEILD	84	None	No	NA	Yes	NILL	5.4	42	15.9	NO	NO	WEEKLY	7-8hrs	NO	NO	NONVEGETARIAN	URBAN	NUCLAR	63.19	POSITIVE	2.45	POSITIVE	#N/A	#N/A	#N/A	#N/A
460	AVULA VENKATA	Female	33	DOCTOR	AB GROUP	Rh+VE	Doctor/Clinician	YES	COVISHEILD	60	None	No	NA	Yes	NILL	5.6	62	22.1	NO	NO	DAILY	7-8hrs	YES	YES	NONVEGETARIAN	URBAN	NUCLAR	83.11	POSITIVE	3.34	POSITIVE	#N/A	#N/A	#N/A	#N/A
461	KALAKATA	Female	38	STAFF NURSE	B GROUP	Rh+VE	Nurse	YES	COVISHEILD	60	Fever,Headache,Myalgia	YES	Severe	Yes	NILL	5.1	52	21.7	NO	NO	DAILY	< 7hrs	YES	NO	NONVEGETARIAN	URBAN	NUCLAR	99.53	POSITIVE	18.86	POSITIVE	#N/A	#N/A	#N/A	#N/A
462	KONDUR	Male	30	PA	A GROUP	Rh+VE	OTHERS	YES	COVISHEILD	34	None	No	NA	No	NILL	5.9	78	25.4	NO	NO	DAILY	7-8hrs	NO	NO	NONVEGETARIAN	URBAN	NUCLAR	98.83	POSITIVE	11.49	POSITIVE	#N/A	#N/A	#N/A	#N/A
463	YELLA	Female	47	STAFF NURSE	B GROUP	Rh+VE	Nurse	YES	COVISHEILD	NA	Fever,Myalgia	No	NA	Yes	NILL	5.2	50	20.2	NO	NO	DAILY	7-8hrs	NO	NO	NONVEGETARIAN	URBAN	NUCLAR	98.78	POSITIVE	15.16	POSITIVE	#N/A	#N/A	#N/A	#N/A
464	PASASM	Female	38	STAFF NURSE	O GROUP	Rh+VE	Nurse	YES	COVISHEILD	28	Fever,Headache,Myalgia	YES	Severe	Yes	NILL	5.6	64	22.8	NO	NO	DAILY	< 7hrs	NO	NO	NONVEGETARIAN	URBAN	NUCLAR	99.36	POSITIVE	14.95	POSITIVE	#N/A	#N/A	#N/A	#N/A
465	LEBAKULA SUDHAKAR	Female	21	STUDENT	O GROUP	Rh+VE	OTHERS	YES	COVISHEILD	29	Fever,Myalgia,Headache,Irritability	No	NA	No	NILL	5.2	53	21.4	NO	NO	WEEKLY	7-8hrs	NO	NO	NONVEGETARIAN	URBAN	SINGLE	90.3	POSITIVE	4.9	POSITIVE	#N/A	#N/A	#N/A	#N/A
466	PARSHA	Male	22	STUDENT	B GROUP	Rh+VE	OTHERS	YES	COVISHEILD	80	None	No	NA	No	NILL	5.5	68	24.9	NO	NO	NONE	7-8hrs	NO	NO	NONVEGETARIAN	URBAN	SINGLE	46.91	NEGATIVE	1.52	NEGATIVE	#N/A	#N/A	#N/A	#N/A
467	BOLLINENI	Female	21	STUDENT	B GROUP	Rh+VE	OTHERS	YES	COVISHEILD	87	Fever,Headache	No	NA	No	NILL	5.4	65	24.6	NO	NO	WEEKLY	7-8hrs	NO	NO	VEGETARIAN	URBAN	NUCLAR	73.89	POSITIVE	3.07	POSITIVE	#N/A	#N/A	#N/A	#N/A
468	SHAIK	Female	21	STUDENT	AB GROUP	Rh+VE	OTHERS	YES	COVISHEILD	81	None	No	NA	No	NILL	5.7	70	24.2	NO	NO	NONE	7-8hrs	NO	NO	NONVEGETARIAN	URBAN	NUCLAR	99.52	POSITIVE	11.99	POSITIVE	#N/A	#N/A	#N/A	#N/A
469	ENUKONDA	Female	22	STUDENT	O GROUP	Rh+VE	OTHERS	YES	COVISHEILD	85	None	No	NA	No	NILL	4.8	45	22.2	NO	NO	NONE	7-8hrs	NO	NO	NONVEGETARIAN	URBAN	NUCLAR	97.82	POSITIVE	8.51	POSITIVE	#N/A	#N/A	#N/A	#N/A
470	VADIVELU	Female	22	STUDENT	B GROUP	Rh+VE	OTHERS	YES	COVISHEILD	84	Fever,Headache	No	NA	No	NILL	4.8	50	24.7	NO	NO	NONE	7-8hrs	NO	NO	NONVEGETARIAN	URBAN	SINGLE	98.84	POSITIVE	9.1	POSITIVE	#N/A	#N/A	#N/A	#N/A
471	VOOTUKOORI	Male	56	SECURITY GAURD	A GROUP	Rh+VE	OTHERS	YES	Covaxin	NA	None	No	NA	Yes	NILL	5.7	107	36.9	NO	YES	DAILY	< 7hrs	NO	NO	NONVEGETARIAN	URBAN	NUCLAR	98.87	POSITIVE	19.65	POSITIVE	#N/A	#N/A	#N/A	#N/A
472	BATTULA	Female	38	LAB TECHNICIAN	A GROUP	Rh+VE	Laboratory Technician	YES	COVISHEILD	38	Headache	YES	Mild	Yes	NILL	5.6	67	23.8	NO	NO	WEEKLY	< 7hrs	NO	NO	NONVEGETARIAN	URBAN	NUCLAR	99.27	POSITIVE	18.97	POSITIVE	#N/A	#N/A	#N/A	#N/A
473	NALLASURA	Male	39	LAB TECHNICIAN	O GROUP	Rh+VE	Laboratory Technician	YES	COVISHEILD	31	None	No	NA	Yes	NILL	5.7	72	24.9	NO	YES	WEEKLY	7-8hrs	NO	NO	NONVEGETARIAN	URBAN	NUCLAR	98.98	POSITIVE	14.75	POSITIVE	#N/A	#N/A	#N/A	#N/A
474	NAMBI	Male	35	LAB TECHNICIAN	AB GROUP	Rh+VE	Laboratory Technician	YES	Covaxin	NA	Fever	YES	Moderate	Yes	NILL	5.7	95	32.8	NO	NO	NONE	7-8hrs	YES	YES	NONVEGETARIAN	URBAN	NUCLAR	83.19	POSITIVE	6.69	POSITIVE	#N/A	#N/A	#N/A	#N/A
475	KUCHI	Female	23	STUDENT	O GROUP	Rh+VE	Nurse	YES	COVISHEILD	44	Fever,Myalgia,Headache	No	NA	Yes	NILL	5.6	55	19.6	NO	NO	DAILY	< 7hrs	NO	NO	NONVEGETARIAN	RURAL	NUCLAR	92.94	POSITIVE	6.28	POSITIVE	#N/A	#N/A	#N/A	#N/A
476	SATISH	Male	34	LAB TECHNICIAN	A GROUP	Rh+VE	Laboratory Technician	YES	COVISHEILD	32	Fever	No	NA	Yes	NILL	5.6	80	28.5	NO	NO	NONE	< 7hrs	NO	NO	NONVEGETARIAN	URBAN	NUCLAR	98.85	POSITIVE	11.75	POSITIVE	#N/A	#N/A	#N/A	#N/A
477	SUPRAJA	Female	40	STAFF NURSE	O GROUP	Rh+VE	Nurse	YES	COVISHEILD	58	Headache,Fever	No	NA	Yes	NILL	5.5	78	28.6	NO	NO	DAILY	< 7hrs	NO	NO	NONVEGETARIAN	URBAN	NUCLAR	18.47	NEGATIVE	3.36	POSITIVE	#N/A	#N/A	#N/A	#N/A
478	SAILAJA	Female	27	STAFF NURSE	B GROUP	Rh+VE	Nurse	YES	COVISHEILD	NA	Fever	No	NA	Yes	NILL	5.3	75	29.3	NO	NO	DAILY	< 7hrs	NO	NO	NONVEGETARIAN	URBAN	NUCLAR	99.53	POSITIVE	16.37	POSITIVE	#N/A	#N/A	#N/A	#N/A
479	JAYALAKSHMI	Female	47	PA	A GROUP	Rh-VE	OTHERS	YES	COVISHEILD	33	Fever,Headache	YES	Asymptomatic	No	NILL	5.2	65	26.2	NO	NO	DAILY	< 7hrs	NO	NO	NONVEGETARIAN	URBAN	NUCLAR	99.47	POSITIVE	21.4	POSITIVE	97.8234	POSITIVE	29.0859	POSITIVE
480	GOWTHAMI	Female	29	STAFF NURSE	A GROUP	Rh+VE	Nurse	YES	COVISHEILD	NA	None	No	NA	Yes	NILL	5.3	78	30.5	NO	NO	DAILY	7-8hrs	NO	NO	NONVEGETARIAN	URBAN	NUCLAR	99.33	POSITIVE	14.05	POSITIVE	#N/A	#N/A	#N/A	#N/A
481	CHATLA	Female	24	STUDENT	O GROUP	Rh+VE	Doctor/Clinician	YES	COVISHEILD	NA	Myalgia	No	NA	Yes	NILL	5.3	54	21.1	NO	NO	NONE	< 7hrs	NO	NO	NONVEGETARIAN	URBAN	SINGLE	48.32	NEGATIVE	2.54	POSITIVE	#N/A	#N/A	#N/A	#N/A
482	TEJASWI	Female	24	STUDENT	A GROUP	Rh+VE	Doctor/Clinician	YES	COVISHEILD	45	Irritability,Myalgia,Headache,Fever	No	NA	Yes	NILL	5	52	22.4	NO	NO	NONE	< 7hrs	YES	NO	NONVEGETARIAN	URBAN	NUCLAR	87.83	POSITIVE	4.91	POSITIVE	#N/A	#N/A	#N/A	#N/A
483	SIVARAMAN	Female	38	LAB TECHNICIAN	A GROUP	Rh+VE	Laboratory Technician	YES	COVISHEILD	28	None	YES	Moderate	Yes	NILL	4.8	58	28.7	NO	NO	NONE	7-8hrs	NO	NO	NONVEGETARIAN	URBAN	NUCLAR	98.89	POSITIVE	15.98	POSITIVE	#N/A	#N/A	#N/A	#N/A
484	PRASAD	Male	42	LAB TECHNICIAN	O GROUP	Rh-VE	Laboratory Technician	YES	COVISHEILD	58	Fever,Myalgia	YES	Moderate	Yes	NILL	5.4	76	28.8	NO	NO	NONE	< 7hrs	NO	NO	NONVEGETARIAN	URBAN	NUCLAR	99.48	POSITIVE	6.71	POSITIVE	#N/A	#N/A	#N/A	#N/A
485	BHUVANESWARI	Female	41	LAB TECHNICIAN	B GROUP	Rh+VE	Laboratory Technician	YES	COVISHEILD	NA	Fever,Headache	YES	Asymptomatic	Yes	NILL	5.4	57	21.6	NO	NO	NONE	< 7hrs	NO	NO	NONVEGETARIAN	URBAN	NUCLAR	61.99	POSITIVE	2.34	POSITIVE	97.59	POSITIVE	42.82	POSITIVE
486	MANJUMATHA	Female	31	STAFF NURSE	AB GROUP	Rh+VE	Nurse	YES	COVISHEILD	89	Myalgia	No	NA	Yes	NILL	5.2	55	22.2	NO	NO	DAILY	7-8hrs	NO	NO	NONVEGETARIAN	URBAN	SINGLE	99.26	POSITIVE	13.76	POSITIVE	#N/A	#N/A	#N/A	#N/A
487	AITHEPALLI	Female	32	STAFF NURSE	B GROUP	Rh+VE	Nurse	YES	COVISHEILD	47	None	No	NA	Yes	NILL	5	51	22	NO	NO	DAILY	7-8hrs	NO	NO	NONVEGETARIAN	URBAN	NUCLAR	99.3	POSITIVE	6.83	POSITIVE	#N/A	#N/A	#N/A	#N/A
488	MURALIDHARAN	Male	31	DOCTOR	O GROUP	Rh+VE	Doctor/Clinician	YES	COVISHEILD	30	None	No	NA	Yes	NILL	5.6	65	23.1	NO	NO	WEEKLY	< 7hrs	NO	NO	VEGETARIAN	URBAN	NUCLAR	55.9	POSITIVE	0.94	NEGATIVE	#N/A	#N/A	#N/A	#N/A
489	MANJUSREE	Female	26	DOCTOR	B GROUP	Rh+VE	Doctor/Clinician	YES	COVISHEILD	52	Myalgia,Headache,Fever	No	NA	Yes	NILL	5.1	62	25.8	NO	NO	WEEKLY	< 7hrs	NO	NO	NONVEGETARIAN	URBAN	SINGLE	99.3	POSITIVE	4.9	POSITIVE	#N/A	#N/A	#N/A	#N/A
490	YAGALATHA	Female	39	LAB TECHNICIAN	O GROUP	Rh+VE	Laboratory Technician	YES	COVISHEILD	86	None	No	NA	Yes	NILL	5.2	74	29.8	NO	NO	NONE	< 7hrs	NO	NO	NONVEGETARIAN	URBAN	NUCLAR	99.57	POSITIVE	9.05	POSITIVE	#N/A	#N/A	#N/A	#N/A
491	ROSELINE MARY	Female	57	LAB TECHNICIAN	O GROUP	Rh-VE	Laboratory Technician	YES	COVISHEILD	60	None	No	NA	Yes	NILL	5.4	63	23.8	NO	NO	WEEKLY	< 7hrs	YES	NO	NONVEGETARIAN	URBAN	NUCLAR	98.9	POSITIVE	6.91	POSITIVE	#N/A	#N/A	#N/A	#N/A
492	JANARDHAN	Male	38	LAB TECHNICIAN	B GROUP	Rh+VE	Laboratory Technician	YES	COVISHEILD	28	None	No	NA	Yes	NILL	6	84	25.1	NO	NO	DAILY	7-8hrs	YES	NO	NONVEGETARIAN	URBAN	NUCLAR	99.51	POSITIVE	7.14	POSITIVE	#N/A	#N/A	#N/A	#N/A
493	SIVAKUMAR	Male	40	DOCTOR	B GROUP	Rh+VE	Doctor/Clinician	YES	COVISHEILD	33	None	YES	Moderate	Yes	NILL	5.9	81	26.4	NO	NO	WEEKLY	7-8hrs	NO	NO	NONVEGETARIAN	URBAN	NUCLAR	99.41	POSITIVE	6.87	POSITIVE	#N/A	#N/A	#N/A	#N/A
494	SANKARI	Female	36	DOCTOR	B GROUP	Rh+VE	Doctor/Clinician	YES	COVISHEILD	30	Fever,Myalgia	YES	Moderate	Yes	NILL	5.6	57	23.8	NO	NO	DAILY	7-8hrs	NO	NO	NONVEGETARIAN	URBAN	NUCLAR	99.41	POSITIVE	10.12	POSITIVE	#N/A	#N/A	#N/A	#N/A
495	CHANDRASEKHAR	Male	34	ASSISTENT PROFESSOR	AB GROUP	Rh+VE	Doctor/Clinician	YES	COVISHEILD	30	None	No	NA	Yes	NILL	5.9	84	27.3	NO	NO	DAILY	7-8hrs	NO	NO	NONVEGETARIAN	URBAN	NUCLAR	48.22	NEGATIVE	1.52	NEGATIVE	#N/A	#N/A	#N/A	#N/A
496	SREEDEVI	Female	40	WARD BOY	Unknown	UNKNOWN	OTHERS	YES	COVISHEILD	35	Fever,Headache,Myalgia	No	NA	Yes	NILL	5.2	52	21	NO	NO	NONE	7-8hrs	NO	NO	NONVEGETARIAN	URBAN	NUCLAR	96.67	POSITIVE	5.07	POSITIVE	#N/A	#N/A	#N/A	#N/A
497	KUMAR	Male	52	WARD BOY	B GROUP	Rh+VE	OTHERS	YES	COVISHEILD	32	None	No	NA	Yes	NILL	5.6	51	18.1	YES	YES	NONE	7-8hrs	NO	NO	NONVEGETARIAN	URBAN	NUCLAR	53.36	POSITIVE	2.42	POSITIVE	#N/A	#N/A	#N/A	#N/A
498	YASHODHA	Female	33	LAB TECHNICIAN	B GROUP	Rh+VE	Laboratory Technician	YES	COVISHEILD	31	Myalgia	No	NA	Yes	NILL	5.4	71	26.9	NO	NO	NONE	7-8hrs	NO	NO	NONVEGETARIAN	URBAN	NUCLAR	98.83	POSITIVE	6.16	POSITIVE	#N/A	#N/A	#N/A	#N/A
499	VIKARAM KUMAR	Male	33	PHARMACIST	O GROUP	Rh+VE	Hospital support staff	YES	COVISHEILD	85	None	YES	Moderate	No	NILL	5.8	82	27.5	NO	NO	NONE	7-8hrs	NO	NO	NONVEGETARIAN	URBAN	NUCLAR	99.44	POSITIVE	8.97	POSITIVE	#N/A	#N/A	#N/A	#N/A
500	HEMAKUMAR	Male	30	PHARMACIST	B GROUP	Rh+VE	Hospital support staff	YES	COVISHEILD	29	None	No	NA	No	NILL	5.7	94	32.5	NO	NO	NONE	7-8hrs	NO	NO	NONVEGETARIAN	URBAN	NUCLAR	98.71	POSITIVE	13.66	POSITIVE	#N/A	#N/A	#N/A	#N/A
501	JYOTHEESWARI	Female	37	PA	O GROUP	Rh+VE	OTHERS	YES	COVISHEILD	80	Fever	No	NA	No	NILL	5.2	65	26.2	NO	NO	DAILY	7-8hrs	NO	NO	VEGETARIAN	URBAN	NUCLAR	99.4	POSITIVE	13.84	POSITIVE	#N/A	#N/A	#N/A	#N/A
502	VANAJAKSHAMAMMA	Female	55	DOCTOR	A GROUP	Rh+VE	Doctor/Clinician	YES	COVISHEILD	54	None	No	NA	No	NILL	5.3	56	21.9	NO	NO	DAILY	7-8hrs	NO	NO	VEGETARIAN	URBAN	GAINT FAMILY	70.27	POSITIVE	1.27	NEGATIVE	#N/A	#N/A	#N/A	#N/A
503	LATHA	Female	47	PA	B GROUP	Rh+VE	OTHERS	YES	COVISHEILD	NA	Fever	YES	Mild	No	NILL	5.2	53	21.4	NO	NO	DAILY	< 7hrs	NO	NO	NONVEGETARIAN	URBAN	SINGLE	99.29	POSITIVE	8.35	POSITIVE	#N/A	#N/A	#N/A	#N/A
504	MOHAN	Male	31	PA	B GROUP	Rh+VE	OTHERS	YES	COVISHEILD	NA	None	YES	Asymptomatic	No	NILL	5.5	60	22	NO	NO	DAILY	< 7hrs	NO	NO	NONVEGETARIAN	URBAN	NUCLAR	99.41	POSITIVE	8.05	POSITIVE	#N/A	#N/A	#N/A	#N/A
505	GURUMURTHY	Male	54	SECURITY GAURD	O GROUP	Rh+VE	Hospital support staff	YES	COVISHEILD	29	None	No	NA	No	NILL	5.1	65	27.1	NO	YES	DAILY	7-8hrs	NO	NO	NONVEGETARIAN	RURAL	NUCLAR	98.97	POSITIVE	6.05	POSITIVE	#N/A	#N/A	#N/A	#N/A
506	USHARANI	Female	47	STAFF NURSE	B GROUP	Rh+VE	Nurse	YES	COVISHEILD	38	None	No	NA	Yes	NILL	5.2	72	29	NO	NO	DAILY	7-8hrs	YES	NO	NONVEGETARIAN	URBAN	NUCLAR	76.19	POSITIVE	1.95	NEGATIVE	#N/A	#N/A	#N/A	#N/A
507	NAGARAJU	Male	40	PA	Unknown	UNKNOWN	OTHERS	YES	COVISHEILD	40	None	YES	Asymptomatic	No	NILL	5.9	67	21.8	NO	NO	DAILY	7-8hrs	NO	NO	NONVEGETARIAN	URBAN	NUCLAR	98.96	POSITIVE	5.33	POSITIVE	#N/A	#N/A	#N/A	#N/A
508	DILEEP KUMAR	Male	54	DOCTOR	O GROUP	Rh-VE	Doctor/Clinician	YES	COVISHEILD	30	Myalgia	YES	Asymptomatic	Yes	NILL	5.4	74	28	NO	NO	WEEKLY	< 7hrs	NO	NO	NONVEGETARIAN	URBAN	NUCLAR	99.34	POSITIVE	4.61	POSITIVE	#N/A	#N/A	#N/A	#N/A
509	MANJULA DEVI	Female	58	ANM	B GROUP	Rh+VE	Nurse	YES	COVISHEILD	31	None	No	NA	Yes	NILL	5.3	80	31.2	NO	NO	DAILY	< 7hrs	NO	NO	NONVEGETARIAN	URBAN	NUCLAR	77.13	POSITIVE	0.88	NEGATIVE	#N/A	#N/A	#N/A	#N/A
510	MUNI MOUNIKA	Female	26	SECURITY GAURD	B GROUP	Rh+VE	OTHERS	YES	COVISHEILD	NA	Fever,None	No	NA	No	NILL	5.3	60	23.4	NO	NO	NONE	7-8hrs	NO	NO	NONVEGETARIAN	URBAN	NUCLAR	99.52	POSITIVE	9.85	POSITIVE	#N/A	#N/A	#N/A	#N/A
511	MADHAVI	Female	43	NURSING TUTOR	B GROUP	Rh+VE	Nurse	YES	COVISHEILD	NA	None	YES	Mild	No	NILL	5.4	68	25.7	NO	NO	DAILY	7-8hrs	YES	NO	NONVEGETARIAN	URBAN	NUCLAR	99.43	POSITIVE	7.81	POSITIVE	#N/A	#N/A	#N/A	#N/A
512	KAMESWARI	Female	42	PHYSIO LECTURER	B GROUP	Rh+VE	Doctor/Clinician	YES	COVISHEILD	45	Myalgia	YES	Mild	No	NILL	5.6	70	24.9	NO	NO	WEEKLY	< 7hrs	NO	YES	NONVEGETARIAN	URBAN	NUCLAR	63.24	POSITIVE	1.46	NEGATIVE	98.59	POSITIVE	42.89	POSITIVE
513	CHANDRA SEKHAR	Male	44	NUCLEAR MEDICINE TECHNOLOGIST	B GROUP	Rh+VE	Laboratory Technician	YES	COVISHEILD	26	None	No	NA	No	NILL	5.5	61	22.4	NO	NO	DAILY	7-8hrs	NO	NO	VEGETARIAN	URBAN	NUCLAR	91.66	POSITIVE	1.23	NEGATIVE	#N/A	#N/A	#N/A	#N/A
514	BABU	Male	55	ASSISTANT DIRECTOR	B GROUP	Rh+VE	Svims Administrative Staff	YES	COVISHEILD	28	Fever	No	NA	Yes	NILL	5.2	54	21.8	NO	NO	WEEKLY	< 7hrs	YES	NO	NONVEGETARIAN	URBAN	NUCLAR	69.5	POSITIVE	0.99	NEGATIVE	#N/A	#N/A	#N/A	#N/A
515	GUNASEKHAR	Male	53	PA	O GROUP	Rh+VE	OTHERS	YES	COVISHEILD	28	None	No	NA	No	NILL	5.5	58	21.3	NO	NO	NONE	7-8hrs	NO	NO	VEGETARIAN	URBAN	NUCLAR	34.42	NEGATIVE	0.41	NEGATIVE	#N/A	#N/A	#N/A	#N/A
516	SUJATHA	Female	53	HEAD NURSE	O GROUP	Rh+VE	Nurse	YES	COVISHEILD	30	Headache,Fever	YES	Asymptomatic	Yes	NILL	5	64	27.6	NO	NO	DAILY	7-8hrs	YES	NO	NONVEGETARIAN	URBAN	NUCLAR	99.51	POSITIVE	12.77	POSITIVE	#N/A	#N/A	#N/A	#N/A
517	LAKSHMI	Female	32	PA	B GROUP	Rh+VE	OTHERS	YES	COVISHEILD	28	Headache,Fever,Myalgia	No	NA	No	NILL	5.6	62	22.1	NO	NO	NONE	7-8hrs	YES	NO	NONVEGETARIAN	URBAN	NUCLAR	47.9	NEGATIVE	0.75	NEGATIVE	#N/A	#N/A	#N/A	#N/A
518	KIRANMAI	Female	36	PA	B GROUP	Rh+VE	OTHERS	YES	COVISHEILD	28	Fever,Headache	No	NA	No	NILL	5	56	24.1	NO	NO	NONE	7-8hrs	YES	NO	NONVEGETARIAN	URBAN	NUCLAR	98.72	POSITIVE	4.94	POSITIVE	#N/A	#N/A	#N/A	#N/A
519	MANJU	Female	26	PA	B GROUP	Rh+VE	OTHERS	YES	COVISHEILD	NA	Fever	No	NA	No	NILL	5.2	70	28.2	NO	NO	NONE	7-8hrs	YES	NO	NONVEGETARIAN	URBAN	NUCLAR	64.08	POSITIVE	1.22	NEGATIVE	#N/A	#N/A	#N/A	#N/A
520	BHUPATHI	Male	44	LAB TECHNICIAN	B GROUP	Rh+VE	Laboratory Technician	YES	Covaxin	NA	None	YES	Mild	Yes	NILL	5.7	110	38	NO	NO	NONE	< 7hrs	YES	NO	NONVEGETARIAN	URBAN	NUCLAR	84.07	POSITIVE	4.78	POSITIVE	97.69	POSITIVE	37.96	POSITIVE
521	PRABHAVATHI	Female	47	LIBRARY ASSISTANT	Unknown	UNKNOWN	OTHERS	YES	COVISHEILD	28	None	No	NA	No	NILL	5.6	67	23.8	NO	NO	WEEKLY	7-8hrs	NO	NO	NONVEGETARIAN	URBAN	NUCLAR	86.18	POSITIVE	2.38	POSITIVE	98.7072	POSITIVE	46.4439	POSITIVE
522	VENKATAMUNI	Male	52	WORKER	O GROUP	Rh+VE	Multipurpose worker	YES	Covaxin	30	None	YES	Asymptomatic	Yes	NILL	4.9	62	29.6	NO	NO	DAILY	7-8hrs	NO	NO	NONVEGETARIAN	URBAN	NUCLAR	98.94	POSITIVE	3.93	POSITIVE	#N/A	#N/A	#N/A	#N/A
523	ANNAPOORNA	Female	34	WORKER	AB GROUP	Rh+VE	Hospital support staff	YES	COVISHEILD	84	Fever,Myalgia	No	NA	Yes	NILL	4.8	68	33.6	NO	NO	NONE	< 7hrs	NO	NO	NONVEGETARIAN	URBAN	NUCLAR	99.49	POSITIVE	4.63	POSITIVE	#N/A	#N/A	#N/A	#N/A
524	NAGABUSHANAMMA	Female	35	WORKER	O GROUP	Rh+VE	Hospital support staff	YES	COVISHEILD	84	Fever	No	NA	Yes	NILL	5	57	24.5	NO	NO	NONE	7-8hrs	NO	NO	NONVEGETARIAN	URBAN	NUCLAR	99.4	POSITIVE	9.78	POSITIVE	#N/A	#N/A	#N/A	#N/A
525	KALYANI	Female	30	WORKER	O GROUP	Rh+VE	Hospital support staff	YES	COVISHEILD	84	Fever,Myalgia	No	NA	No	NILL	5.4	80	30.3	NO	NO	NONE	< 7hrs	NO	NO	NONVEGETARIAN	URBAN	NUCLAR	99.46	POSITIVE	8.3	POSITIVE	#N/A	#N/A	#N/A	#N/A
526	SWATHI	Female	32	PA	O GROUP	Rh+VE	Svims Administrative Staff	YES	Covaxin	30	None	YES	Mild	No	NILL	5.2	52	21	NO	NO	NONE	7-8hrs	YES	NO	NONVEGETARIAN	URBAN	SINGLE	85.83	POSITIVE	7.47	POSITIVE	98.7415	POSITIVE	46.0072	POSITIVE
527	SUDESHNA	Female	43	STAFF NURSE	B GROUP	Rh-VE	Nurse	YES	COVISHEILD	84	None	No	NA	Yes	NILL	5.4	45	17	NO	NO	NONE	< 7hrs	NO	NO	NONVEGETARIAN	URBAN	NUCLAR	99.53	POSITIVE	7.82	POSITIVE	#N/A	#N/A	#N/A	#N/A
528	MADHAVI	Female	45	STAFF NURSE	O GROUP	Rh+VE	Nurse	YES	COVISHEILD	84	Myalgia,Headache	No	NA	Yes	NILL	5.2	45	18.1	NO	NO	NONE	7-8hrs	NO	NO	NONVEGETARIAN	URBAN	NUCLAR	99.38	POSITIVE	5.28	POSITIVE	#N/A	#N/A	#N/A	#N/A
529	DHANUNJAYA	Male	43	DIALYSIS TECHNICIAN	AB GROUP	Rh+VE	Laboratory Technician	YES	COVISHEILD	28	None	No	NA	Yes	NILL	5.4	82	31	NO	NO	WEEKLY	7-8hrs	NO	NO	NONVEGETARIAN	URBAN	NUCLAR	99.84	POSITIVE	7.33	POSITIVE	#N/A	#N/A	#N/A	#N/A
530	SUBBALAKSHMAMMA	Female	57	ANM	B GROUP	Rh+VE	Nurse	YES	COVISHEILD	45	Myalgia,Headache	No	NA	Yes	NILL	5.2	55	22.2	NO	NO	DAILY	< 7hrs	NO	NO	NONVEGETARIAN	URBAN	NUCLAR	98.99	POSITIVE	7.36	POSITIVE	#N/A	#N/A	#N/A	#N/A
531	LAKSHMI NARAYANA	Male	42	ANEASTHISIA TECHNICIAN	B GROUP	Rh+VE	Laboratory Technician	YES	COVISHEILD	60	Myalgia	YES	Mild	Yes	NILL	5.6	67	23.8	NO	NO	DAILY	7-8hrs	NO	NO	NONVEGETARIAN	URBAN	NUCLAR	99.17	POSITIVE	3.28	POSITIVE	#N/A	#N/A	#N/A	#N/A
532	REDDY PRATHAP	Male	30	STAFF NURSE	O GROUP	Rh+VE	Nurse	YES	COVISHEILD	34	Headache,Myalgia	YES	Mild	Yes	NILL	5.4	65	24.6	NO	NO	NONE	7-8hrs	NO	NO	NONVEGETARIAN	URBAN	NUCLAR	99.49	POSITIVE	4.98	POSITIVE	#N/A	#N/A	#N/A	#N/A
533	PARIMALA	Female	23	ANEASTHISIA TECHNICIAN	O GROUP	Rh+VE	Laboratory Technician	YES	COVISHEILD	60	Fever,Myalgia	No	NA	Yes	NILL	4.8	57	28.2	NO	NO	DAILY	7-8hrs	NO	NO	NONVEGETARIAN	URBAN	NUCLAR	99.48	POSITIVE	9.96	POSITIVE	#N/A	#N/A	#N/A	#N/A
534	BHIMESH	Male	21	STUDENT	O GROUP	Rh+VE	OTHERS	YES	COVISHEILD	84	Fever	YES	Mild	No	NILL	5.7	72	24.9	NO	NO	DAILY	7-8hrs	NO	NO	NONVEGETARIAN	URBAN	NUCLAR	99.48	POSITIVE	10.31	POSITIVE	#N/A	#N/A	#N/A	#N/A
535	SWETHA RAO	Female	32	ASSISTANT PROFESSOR	O GROUP	Rh+VE	Doctor/Clinician	YES	COVISHEILD	28	Fever	No	NA	Yes	NILL	5	54	23.3	NO	NO	NONE	< 7hrs	NO	NO	NONVEGETARIAN	URBAN	NUCLAR	58.28	POSITIVE	1.92	NEGATIVE	#N/A	#N/A	#N/A	#N/A
536	NIHARIKA	Female	21	STUDENT	O GROUP	Rh+VE	OTHERS	YES	COVISHEILD	84	Fever	No	NA	No	NILL	5	45	19.4	NO	NO	NONE	7-8hrs	NO	NO	VEGETARIAN	URBAN	NUCLAR	95.55	POSITIVE	5.2	POSITIVE	#N/A	#N/A	#N/A	#N/A
537	ANITHA	Female	27	WORKER	B GROUP	Rh+VE	Multipurpose worker	YES	Covaxin	28	Fever	YES	Mild	Yes	NILL	5.2	50	20.2	NO	NO	NONE	7-8hrs	YES	NO	NONVEGETARIAN	URBAN	NUCLAR	99.28	POSITIVE	7.74	POSITIVE	#N/A	#N/A	#N/A	#N/A
538	LEELAVATHI	Female	33	STAFF NURSE	B GROUP	Rh+VE	Nurse	YES	COVISHEILD	44	None	No	NA	Yes	NILL	5.2	60	24.2	NO	NO	NONE	7-8hrs	YES	NO	NONVEGETARIAN	URBAN	NUCLAR	99.33	POSITIVE	11.05	POSITIVE	#N/A	#N/A	#N/A	#N/A
539	DEEPIKA	Female	24	PHYSIO STUDENT	A GROUP	Rh+VE	OTHERS	YES	COVISHEILD	45	Myalgia,Headache,Fever	YES	Moderate	No	NILL	5.4	45	17	NO	NO	NONE	7-8hrs	YES	NO	NONVEGETARIAN	URBAN	SINGLE	94.81	POSITIVE	3.42	POSITIVE	#N/A	#N/A	#N/A	#N/A
540	MALLIKARJUN	Male	33	DOCTOR	B GROUP	Rh+VE	Doctor/Clinician	YES	COVISHEILD	30	Myalgia,Fever	YES	Mild	Yes	NILL	5.1	104	43.3	NO	NO	DAILY	> 8hrs	NO	NO	NONVEGETARIAN	URBAN	NUCLAR	97.96	POSITIVE	3.64	POSITIVE	#N/A	#N/A	#N/A	#N/A
541	PREMALATHA	Female	33	PA	O GROUP	Rh-VE	Svims Administrative Staff	YES	COVISHEILD	84	Irritability	No	NA	No	NILL	5.2	58	23.4	NO	NO	NONE	7-8hrs	NO	NO	NONVEGETARIAN	URBAN	NUCLAR	97.29	POSITIVE	2.61	POSITIVE	#N/A	#N/A	#N/A	#N/A
542	RAJYALAKSHMI	Female	30	PA	O GROUP	Rh+VE	Svims Administrative Staff	YES	COVISHEILD	84	Fever	No	NA	No	NILL	5.4	65	24.6	NO	NO	NONE	< 7hrs	NO	NO	NONVEGETARIAN	URBAN	NUCLAR	76.29	POSITIVE	1.03	NEGATIVE	#N/A	#N/A	#N/A	#N/A
543	KANAKADURGA	Female	31	PA	B GROUP	Rh+VE	Svims Administrative Staff	YES	COVISHEILD	84	Myalgia,Fever	No	NA	No	NILL	5.3	67	26.2	NO	NO	NONE	7-8hrs	NO	YES	NONVEGETARIAN	URBAN	NUCLAR	99.41	POSITIVE	7.14	POSITIVE	#N/A	#N/A	#N/A	#N/A
544	RAGA SWAPNA	Female	27	PA	B GROUP	Rh+VE	Svims Administrative Staff	YES	COVISHEILD	30	Fever,Myalgia	YES	Mild	No	NILL	5.2	53	21.4	NO	NO	NONE	> 8hrs	NO	NO	NONVEGETARIAN	URBAN	NUCLAR	98.11	POSITIVE	4.3	POSITIVE	#N/A	#N/A	#N/A	#N/A
545	SHYAMALA	Female	42	WORKER	O GROUP	Rh+VE	Multipurpose worker	YES	COVISHEILD	84	Irritability,Fever	No	NA	Yes	NILL	5.4	55	20.8	NO	NO	NONE	< 7hrs	NO	NO	NONVEGETARIAN	URBAN	NUCLAR	98.54	POSITIVE	5.63	POSITIVE	#N/A	#N/A	#N/A	#N/A
546	SANKARIAH	Male	39	WORKER	A GROUP	Rh+VE	Svims Administrative Staff	YES	COVISHEILD	30	Irritability	No	NA	Yes	NILL	5.7	83	28.7	NO	NO	DAILY	7-8hrs	NO	NO	NONVEGETARIAN	URBAN	NUCLAR	99.62	POSITIVE	7.84	POSITIVE	#N/A	#N/A	#N/A	#N/A
547	BALAJI	Male	56	SECURITY GAURD	O GROUP	Rh+VE	OTHERS	YES	COVISHEILD	30	None	No	NA	No	NILL	5	98	42.2	NO	YES	DAILY	7-8hrs	NO	NO	NONVEGETARIAN	URBAN	NUCLAR	99.11	POSITIVE	8.25	POSITIVE	#N/A	#N/A	#N/A	#N/A
548	Lokeswara	Male	37	Security Gaurd	A GROUP	Rh-VE	Hospital support staff	YES	COVISHEILD	64	None	No	NA	No	NILL	6	86	25.7	NO	YES	NONE	< 7hrs	NO	NO	NONVEGETARIAN	URBAN	NUCLAR	99.07	POSITIVE	5.35	POSITIVE	#N/A	#N/A	#N/A	#N/A
549	SATEESH	Male	46	RADIOGRAPHER	B GROUP	Rh+VE	Doctor/Clinician	YES	COVISHEILD	42	Myalgia,Fever	No	NA	Yes	NILL	5.8	82	27.5	NO	NO	DAILY	< 7hrs	NO	NO	NONVEGETARIAN	URBAN	NUCLAR	85.1	POSITIVE	1.91	NEGATIVE	#N/A	#N/A	#N/A	#N/A
550	RAJESH	Male	26	LAB TECHNICIAN	O GROUP	Rh+VE	Laboratory Technician	YES	COVISHEILD	45	Fever,Myalgia	YES	Asymptomatic	Yes	NILL	5.11	83	25.5	NO	NO	NONE	7-8hrs	YES	YES	NONVEGETARIAN	URBAN	SINGLE	99.37	POSITIVE	7.23	POSITIVE	#N/A	#N/A	#N/A	#N/A
551	SURESH KUMAR	Male	55	ACCOUNTS OFFICER	B GROUP	Rh+VE	Svims Administrative Staff	YES	COVISHEILD	30	Fever	YES	Mild	No	NILL	6	74	22.1	NO	NO	DAILY	< 7hrs	NO	NO	VEGETARIAN	URBAN	NUCLAR	99.4	POSITIVE	5.05	POSITIVE	93.6318	POSITIVE	37.5979	POSITIVE
552	RENUKA	Female	41	LAB TECHNICIAN	O GROUP	Rh+VE	Laboratory Technician	YES	COVISHEILD	32	Myalgia	No	NA	Yes	NILL	5.3	74	28.9	NO	NO	NONE	< 7hrs	NO	NO	NONVEGETARIAN	URBAN	NUCLAR	99.47	POSITIVE	12.54	POSITIVE	#N/A	#N/A	#N/A	#N/A
553	SARASWATHI	Female	23	LAB TECHNICIAN	B GROUP	Rh+VE	Laboratory Technician	YES	Covaxin	35	Irritability	YES	Mild	Yes	NILL	5.2	57	23	NO	NO	DAILY	< 7hrs	NO	NO	NONVEGETARIAN	URBAN	SINGLE	99.69	POSITIVE	15.58	POSITIVE	#N/A	#N/A	#N/A	#N/A
554	SRIDEVI	Female	38	LAB TECHNICIAN	B GROUP	Rh+VE	Laboratory Technician	YES	COVISHEILD	28	Myalgia,Irritability	No	NA	Yes	NILL	5.4	61	23.1	NO	NO	NONE	< 7hrs	NO	NO	NONVEGETARIAN	URBAN	NUCLAR	84.61	POSITIVE	2.07	POSITIVE	#N/A	#N/A	#N/A	#N/A
555	HEMANTH KUMAR	Male	23	SECURITY GAURD	Unknown	UNKNOWN	Hospital support staff	YES	COVISHEILD	60	None	No	NA	No	NILL	6	82	24.5	NO	YES	NONE	7-8hrs	NO	NO	NONVEGETARIAN	URBAN	SINGLE	99.19	POSITIVE	3.47	POSITIVE	#N/A	#N/A	#N/A	#N/A
556	SIVA PRASAD	Male	26	SURGICAL STORE BOY	O GROUP	Rh+VE	Hospital support staff	YES	COVISHEILD	34	Fever,Headache,Myalgia	No	NA	No	NILL	5.2	50	20.2	NO	NO	NONE	7-8hrs	NO	NO	NONVEGETARIAN	RURAL	NUCLAR	98.88	POSITIVE	5.48	POSITIVE	#N/A	#N/A	#N/A	#N/A
557	MALATHI	Female	34	DOCTOR	B GROUP	Rh+VE	Doctor/Clinician	YES	COVISHEILD	28	None	No	NA	Yes	NILL	5.4	68	25.7	NO	NO	DAILY	7-8hrs	NO	NO	NONVEGETARIAN	URBAN	NUCLAR	98.77	POSITIVE	6.41	POSITIVE	#N/A	#N/A	#N/A	#N/A
558	AKILA	Female	34	DOCTOR	A GROUP	Rh+VE	Doctor/Clinician	YES	COVISHEILD	34	None	YES	Asymptomatic	Yes	NILL	5.3	73	28.5	NO	NO	DAILY	> 8hrs	NO	NO	VEGETARIAN	URBAN	GAINT FAMILY	99.28	POSITIVE	6.03	POSITIVE	#N/A	#N/A	#N/A	#N/A
559	GURUVAIAH	Male	48	SECURITY GAURD	B GROUP	Rh+VE	Hospital support staff	YES	COVISHEILD	42	None	No	NA	No	NILL	5.6	75	26.7	NO	YES	NONE	< 7hrs	NO	NO	NONVEGETARIAN	URBAN	NUCLAR	98.54	POSITIVE	4.31	POSITIVE	#N/A	#N/A	#N/A	#N/A
560	MADHAVI	Female	36	LAB TECHNICIAN	O GROUP	Rh+VE	Laboratory Technician	YES	COVISHEILD	60	Headache,Myalgia	No	NA	Yes	NILL	5.4	75	28.4	NO	NO	NONE	< 7hrs	YES	YES	NONVEGETARIAN	URBAN	NUCLAR	63.53	POSITIVE	3.56	POSITIVE	#N/A	#N/A	#N/A	#N/A
561	HEM SAI	Male	27	DOCTOR	B GROUP	Rh+VE	Doctor/Clinician	YES	COVISHEILD	28	Fever,Myalgia	YES	Moderate	Yes	NILL	5.7	86	29.7	NO	YES	DAILY	< 7hrs	YES	NO	NONVEGETARIAN	URBAN	NUCLAR	99.82	POSITIVE	7.45	POSITIVE	98.7464	POSITIVE	26.3269	POSITIVE
562	ALOK	Male	51	DOCTOR	B GROUP	Rh-VE	Doctor/Clinician	YES	COVISHEILD	30	None	No	NA	Yes	NILL	5.6	60	21.3	NO	NO	DAILY	< 7hrs	NO	NO	VEGETARIAN	URBAN	NUCLAR	98.87	POSITIVE	2.91	POSITIVE	#N/A	#N/A	#N/A	#N/A
563	NAGARANI	Female	57	STAFF NURSE	A GROUP	Rh+VE	Nurse	YES	COVISHEILD	84	Fever	YES	Mild	Yes	NILL	5.2	68	27.4	NO	NO	WEEKLY	7-8hrs	NO	NO	VEGETARIAN	URBAN	NUCLAR	99.2	POSITIVE	9.05	POSITIVE	#N/A	#N/A	#N/A	#N/A
564	SHOBA RANI	Female	40	STAFF NURSE	O GROUP	Rh+VE	Nurse	YES	COVISHEILD	30	Myalgia,Headache	YES	Mild	Yes	NILL	5.8	64	21.5	NO	NO	NONE	< 7hrs	NO	NO	NONVEGETARIAN	URBAN	NUCLAR	99.12	POSITIVE	6.05	POSITIVE	#N/A	#N/A	#N/A	#N/A
565	LAKSHMI DEVI	Female	37	STAFF NURSE	B GROUP	Rh+VE	Nurse	YES	COVISHEILD	60	Fever,Headache,Myalgia	YES	Mild	Yes	NILL	6	55	16.4	NO	NO	NONE	< 7hrs	NO	NO	NONVEGETARIAN	URBAN	NUCLAR	98.26	POSITIVE	6.64	POSITIVE	#N/A	#N/A	#N/A	#N/A
566	CHAKRAPANI	Female	39	STAFF NURSE	B GROUP	Rh+VE	Nurse	YES	COVISHEILD	64	Headache,Fever	No	NA	Yes	NILL	5.4	61	23.1	NO	NO	NONE	< 7hrs	NO	NO	NONVEGETARIAN	URBAN	NUCLAR	99.17	POSITIVE	5.53	POSITIVE	#N/A	#N/A	#N/A	#N/A
567	CHIRANJEEVULU	Male	46	PA	O GROUP	Rh+VE	Svims Administrative Staff	YES	COVISHEILD	84	Myalgia	No	NA	No	NILL	5.6	70	24.9	NO	NO	NONE	< 7hrs	NO	NO	NONVEGETARIAN	URBAN	NUCLAR	96.95	POSITIVE	4.22	POSITIVE	#N/A	#N/A	#N/A	#N/A
568	LAKSHMIPATHI	Male	36	PA	AB GROUP	Rh+VE	Svims Administrative Staff	YES	COVISHEILD	56	Myalgia	No	NA	No	NILL	5.4	72	27.2	NO	NO	NONE	7-8hrs	NO	NO	NONVEGETARIAN	URBAN	NUCLAR	99.45	POSITIVE	9.17	POSITIVE	86.6294	POSITIVE	30.7208	POSITIVE
569	RADHIKA	Female	41	STAFF NURSE	AB GROUP	Rh+VE	Nurse	YES	COVISHEILD	30	None	No	NA	Yes	NILL	5.3	58	22.7	NO	NO	NONE	< 7hrs	NO	NO	NONVEGETARIAN	URBAN	NUCLAR	98.55	POSITIVE	2.81	POSITIVE	#N/A	#N/A	#N/A	#N/A
570	GIRIJA KUMARI	Female	41	ASSISTANT PROFESSOR	B GROUP	Rh+VE	Doctor/Clinician	YES	COVISHEILD	30	Myalgia	No	NA	Yes	NILL	5.3	60	23.4	NO	NO	DAILY	7-8hrs	NO	NO	NONVEGETARIAN	URBAN	NUCLAR	99.15	POSITIVE	3.15	POSITIVE	#N/A	#N/A	#N/A	#N/A
571	GOKUL	Male	31	ASSISTANT PROFESSOR	A GROUP	Rh+VE	Doctor/Clinician	YES	Covaxin	30	None	No	NA	Yes	NILL	5.3	85	33.2	NO	NO	DAILY	7-8hrs	NO	NO	VEGETARIAN	URBAN	NUCLAR	50.97	POSITIVE	1.41	NEGATIVE	#N/A	#N/A	#N/A	#N/A
572	PRAVALIKA	Female	28	DOCTOR	B GROUP	Rh+VE	Doctor/Clinician	YES	COVISHEILD	35	Fever,Headache	No	NA	Yes	NILL	5.4	55	20.8	NO	NO	WEEKLY	< 7hrs	YES	NO	NONVEGETARIAN	URBAN	SINGLE	99.38	POSITIVE	5.24	POSITIVE	#N/A	#N/A	#N/A	#N/A
573	LOHITHA	Female	25	DOCTOR	O GROUP	Rh+VE	Doctor/Clinician	YES	COVISHEILD	38	Headache,Fever	No	NA	Yes	NILL	5.5	64	23.5	NO	NO	NONE	7-8hrs	YES	NO	NONVEGETARIAN	URBAN	SINGLE	99.34	POSITIVE	6.25	POSITIVE	99.0794	POSITIVE	21.7612	POSITIVE
574	POWNAMMA	Female	43	STAFF NURSE	B GROUP	Rh+VE	Nurse	YES	COVISHEILD	60	Fever	No	NA	Yes	NILL	5.3	57	22.3	NO	NO	WEEKLY	7-8hrs	NO	NO	NONVEGETARIAN	URBAN	NUCLAR	99.46	POSITIVE	7.35	POSITIVE	#N/A	#N/A	#N/A	#N/A
575	SREEKANTH	Male	28	LAB TECHNICIAN	AB GROUP	Rh+VE	Laboratory Technician	YES	COVISHEILD	84	None	YES	Mild	Yes	NILL	5.6	80	28.5	NO	YES	WEEKLY	7-8hrs	NO	NO	NONVEGETARIAN	URBAN	NUCLAR	99.41	POSITIVE	8.23	POSITIVE	#N/A	#N/A	#N/A	#N/A
576	SHAMANTHAKAMANI	Female	57	ANM	O GROUP	Rh+VE	Nurse	YES	COVISHEILD	60	None	YES	Mild	Yes	NILL	5.7	70	24.2	NO	NO	DAILY	< 7hrs	NO	NO	VEGETARIAN	URBAN	NUCLAR	97.75	POSITIVE	3.95	POSITIVE	#N/A	#N/A	#N/A	#N/A
577	RAJAMMA	Female	57	ANM	O GROUP	Rh+VE	Nurse	YES	COVISHEILD	42	Headache,Myalgia,Fever	YES	Mild	Yes	NILL	5.3	62	24.2	NO	NO	NONE	7-8hrs	NO	NO	NONVEGETARIAN	URBAN	NUCLAR	99.34	POSITIVE	7.72	POSITIVE	#N/A	#N/A	#N/A	#N/A
578	RAMU	Male	42	MRD TECHNICIAN	O GROUP	Rh+VE	Laboratory Technician	YES	COVISHEILD	35	Myalgia	YES	Mild	Yes	NILL	5.4	63	23.8	NO	NO	DAILY	< 7hrs	NO	NO	NONVEGETARIAN	URBAN	NUCLAR	99.53	POSITIVE	3.39	POSITIVE	-39.6517	NEGATIVE	15.4952	POSITIVE
579	AMRUTHA	Female	53	STAFF NURSE	A GROUP	Rh+VE	Nurse	YES	COVISHEILD	45	Myalgia	No	NA	Yes	NILL	5.4	57	21.6	NO	NO	NONE	< 7hrs	YES	NO	NONVEGETARIAN	URBAN	NUCLAR	87.56	POSITIVE	1.35	NEGATIVE	#N/A	#N/A	#N/A	#N/A
580	SUBRAMANYAM	Male	30	LAB TECHNICIAN	O GROUP	Rh+VE	Laboratory Technician	YES	COVISHEILD	30	None	YES	Mild	Yes	NILL	5.5	60	22	NO	NO	NONE	< 7hrs	NO	YES	NONVEGETARIAN	URBAN	NUCLAR	98.09	POSITIVE	3.71	POSITIVE	#N/A	#N/A	#N/A	#N/A
581	RIYAZ	Male	23	STUDENT	A GROUP	Rh+VE	OTHERS	No	not vaccinated	na	None	No	NA	Yes	NILL	5.1	50	20.8	NO	NO	NONE	< 7hrs	NO	NO	NONVEGETARIAN	URBAN	SINGLE	41.84	NEGATIVE	0.29	NEGATIVE	#N/A	#N/A	#N/A	#N/A
582	DHARANI	Female	20	STUDENT	A GROUP	Rh+VE	OTHERS	No	not vaccinated	na	None	YES	Asymptomatic	Yes	NILL	5	50	21.5	NO	NO	NONE	7-8hrs	NO	NO	NONVEGETARIAN	URBAN	SINGLE	55.62	POSITIVE	0.58	NEGATIVE	98.56	POSITIVE	39.64	POSITIVE
583	VANI	Female	32	STAFF NURSE	B GROUP	Rh+VE	Nurse	YES	COVISHEILD	84	Myalgia	No	NA	Yes	NILL	5	55	23.7	NO	NO	DAILY	< 7hrs	NO	NO	NONVEGETARIAN	URBAN	NUCLAR	99.88	POSITIVE	2.79	POSITIVE	#N/A	#N/A	#N/A	#N/A
584	GANESH	Male	46	ATTENDER	O GROUP	Rh+VE	Multipurpose worker	YES	COVISHEILD	86	None	No	NA	Yes	NILL	5.2	60	24.2	NO	NO	NONE	7-8hrs	NO	NO	NONVEGETARIAN	URBAN	NUCLAR	99.47	POSITIVE	4.22	POSITIVE	#N/A	#N/A	#N/A	#N/A
585	MEENA KUMARI	Female	49	PA	A GROUP	Rh+VE	Svims Administrative Staff	YES	COVISHEILD	28	None	No	NA	No	NILL	5.2	60	24.2	NO	NO	NONE	< 7hrs	NO	NO	NONVEGETARIAN	URBAN	NUCLAR	99.32	POSITIVE	4.96	POSITIVE	#N/A	#N/A	#N/A	#N/A
586	SARITHA	Female	42	PA	B GROUP	Rh+VE	Svims Administrative Staff	YES	COVISHEILD	28	Myalgia,Fever	No	NA	No	NILL	5.3	72	28.1	NO	NO	NONE	< 7hrs	NO	NO	NONVEGETARIAN	URBAN	NUCLAR	90.48	POSITIVE	1.4	NEGATIVE	#N/A	#N/A	#N/A	#N/A
587	SHARADHA	Female	35	PA	Unknown	UNKNOWN	Svims Administrative Staff	YES	COVISHEILD	35	None	No	NA	No	NILL	5	48	20.7	NO	NO	NONE	< 7hrs	NO	NO	NONVEGETARIAN	URBAN	NUCLAR	99.5	POSITIVE	5.61	POSITIVE	#N/A	#N/A	#N/A	#N/A
588	AHAMED BASHA	Male	42	DRIVER	O GROUP	Rh-VE	Hospital support staff	YES	COVISHEILD	84	None	YES	Mild	Yes	NILL	5.6	81	28.8	YES	NO	DAILY	< 7hrs	NO	NO	NONVEGETARIAN	URBAN	NUCLAR	99.51	POSITIVE	7.57	POSITIVE	#N/A	#N/A	#N/A	#N/A
589	GOPINATH REDDY	Male	37	DOCTOR	O GROUP	Rh+VE	Doctor/Clinician	YES	COVISHEILD	50	Headache,Myalgia,Fever,Irritability	YES	Mild	Yes	NILL	5.1	90	37.5	NO	NO	NONE	< 7hrs	NO	NO	NONVEGETARIAN	URBAN	NUCLAR	99.23	POSITIVE	9.63	POSITIVE	#N/A	#N/A	#N/A	#N/A
590	SURENDRA	Male	27	LAB TECHNICIAN	B GROUP	Rh+VE	Laboratory Technician	YES	COVISHEILD	28	Myalgia	No	NA	Yes	NILL	6	87	26	NO	YES	DAILY	7-8hrs	NO	NO	NONVEGETARIAN	URBAN	SINGLE	99.34	POSITIVE	4.31	POSITIVE	#N/A	#N/A	#N/A	#N/A
591	ANIUL KUMAR	Male	33	DOCTOR	A GROUP	Rh+VE	Doctor/Clinician	YES	COVISHEILD	29	Fever	No	NA	Yes	NILL	5.6	106	37.7	NO	NO	WEEKLY	< 7hrs	NO	NO	NONVEGETARIAN	URBAN	NUCLAR	99.8	POSITIVE	3.54	POSITIVE	#N/A	#N/A	#N/A	#N/A
592	NAMRATHA	Female	23	STUDENT	O GROUP	Rh+VE	Doctor/Clinician	YES	COVISHEILD	29	Myalgia	No	NA	Yes	NILL	5.6	54	19.2	NO	NO	DAILY	< 7hrs	NO	NO	VEGETARIAN	URBAN	SINGLE	68.25	POSITIVE	0.57	NEGATIVE	#N/A	#N/A	#N/A	#N/A
593	ALEKHYA	Female	34	DOCTOR	O GROUP	Rh+VE	Doctor/Clinician	YES	COVISHEILD	35	Myalgia	No	NA	Yes	NILL	5.3	90	35.1	NO	NO	NONE	< 7hrs	NO	NO	NONVEGETARIAN	URBAN	NUCLAR	82.94	POSITIVE	0.86	NEGATIVE	#N/A	#N/A	#N/A	#N/A
594	SHANTHI	Female	46	ASSOCIATE PROFESSOR	O GROUP	Rh+VE	Doctor/Clinician	YES	COVISHEILD	28	Fever	YES	Severe	Yes	NILL	5.7	65	22.4	NO	NO	NONE	< 7hrs	NO	NO	VEGETARIAN	URBAN	NUCLAR	99.39	POSITIVE	9.91	POSITIVE	#N/A	#N/A	#N/A	#N/A
595	RAMAMURTHY	Male	40	LAB TECHNOLOGIST	A GROUP	Rh+VE	Laboratory Technician	YES	COVISHEILD	28	None	No	NA	Yes	NILL	5.4	63	23.8	NO	YES	DAILY	7-8hrs	NO	NO	NONVEGETARIAN	URBAN	NUCLAR	81.46	POSITIVE	1.36	NEGATIVE	#N/A	#N/A	#N/A	#N/A
596	VENKATA TRITHESWARI	Female	29	STAFF NURSE	B GROUP	Rh+VE	Nurse	YES	Covaxin	NA	Fever,Headache,Myalgia	YES	Asymptomatic	Yes	NILL	5.6	60	21.3	NO	NO	DAILY	< 7hrs	YES	NO	NONVEGETARIAN	URBAN	NUCLAR	97.43	POSITIVE	6.67	POSITIVE	#N/A	#N/A	#N/A	#N/A
597	BHAGYAMMA	Female	28	STAFF NURSE	O GROUP	Rh+VE	Nurse	YES	COVISHEILD	NA	Myalgia	YES	Asymptomatic	Yes	NILL	5.7	63	21.8	NO	NO	DAILY	< 7hrs	NO	NO	NONVEGETARIAN	URBAN	NUCLAR	99.61	POSITIVE	6.67	POSITIVE	#N/A	#N/A	#N/A	#N/A
598	DEEPA	Female	39	LAB TECHNICIAN	O GROUP	Rh-VE	Laboratory Technician	YES	COVISHEILD	28	Fever	YES	Asymptomatic	Yes	NILL	5.6	63	22.4	NO	NO	DAILY	< 7hrs	NO	YES	NONVEGETARIAN	RURAL	NUCLAR	99.51	POSITIVE	5.98	POSITIVE	#N/A	#N/A	#N/A	#N/A
599	NAGALAKSHMI	Female	21	STUDENT	B GROUP	Rh+VE	OTHERS	YES	COVISHEILD	60	Fever	YES	Asymptomatic	Yes	NILL	5.3	52	20.3	NO	NO	NONE	> 8hrs	NO	NO	NONVEGETARIAN	URBAN	SINGLE	99.81	POSITIVE	2.98	POSITIVE	#N/A	#N/A	#N/A	#N/A
600	LAKSHMI	Female	33	WORKER	Unknown	UNKNOWN	Hospital support staff	YES	COVISHEILD	84	Headache,Myalgia,Irritability	No	NA	Yes	NILL	5.2	68	27.4	NO	NO	DAILY	< 7hrs	NO	NO	NONVEGETARIAN	URBAN	NUCLAR	99.34	POSITIVE	2.45	POSITIVE	#N/A	#N/A	#N/A	#N/A
601	MUNI REDDY	Male	42	ATTENDER	A GROUP	Rh-VE	Multipurpose worker	YES	COVISHEILD	44	Fever	No	NA	Yes	NILL	5.4	44	16.7	NO	NO	DAILY	< 7hrs	NO	NO	NONVEGETARIAN	URBAN	NUCLAR	98.9	POSITIVE	3.33	POSITIVE	#N/A	#N/A	#N/A	#N/A
602	LIKHITHA	Female	24	HOUSE SURGEON	O GROUP	Rh+VE	Doctor/Clinician	YES	COVISHEILD	30	Fever,Myalgia	YES	Mild	Yes	NILL	5.6	54	19.2	NO	NO	NONE	< 7hrs	NO	NO	NONVEGETARIAN	URBAN	SINGLE	99.03	POSITIVE	7.18	POSITIVE	#N/A	#N/A	#N/A	#N/A
603	GEETA RANI	Female	24	HOUSE SURGEON	B GROUP	Rh+VE	Doctor/Clinician	No	not vaccinated	na	None	YES	Mild	Yes	NILL	5	53	22.8	NO	NO	NONE	< 7hrs	NO	NO	NONVEGETARIAN	URBAN	SINGLE	96.81	POSITIVE	5.07	POSITIVE	98.89	POSITIVE	38.21	POSITIVE
604	NOORJAHAN	Female	52	ANM	O GROUP	Rh+VE	Nurse	YES	COVISHEILD	32	None	No	NA	Yes	NILL	5.3	53	20.7	NO	NO	DAILY	< 7hrs	NO	YES	NONVEGETARIAN	URBAN	NUCLAR	72.29	POSITIVE	1.27	NEGATIVE	#N/A	#N/A	#N/A	#N/A
605	SAI NIHARIKA	Female	24	STAFF NURSE	B GROUP	Rh+VE	Nurse	YES	COVISHEILD	84	Myalgia	No	NA	Yes	NILL	5.4	90	34.1	NO	NO	NONE	7-8hrs	NO	YES	NONVEGETARIAN	URBAN	SINGLE	99.32	POSITIVE	8.83	POSITIVE	#N/A	#N/A	#N/A	#N/A
606	GOWRI DEVI	Female	35	PHARMACIST	AB GROUP	Rh+VE	Doctor/Clinician	YES	COVISHEILD	45	Fever,Headache,Myalgia	No	NA	Yes	NILL	4.8	67	33.1	NO	NO	NONE	< 7hrs	NO	NO	NONVEGETARIAN	URBAN	NUCLAR	54.85	POSITIVE	0.32	NEGATIVE	#N/A	#N/A	#N/A	#N/A
607	KALPANA	Female	27	PA	B GROUP	Rh+VE	Svims Administrative Staff	YES	COVISHEILD	29	Fever,Headache	YES	Mild	No	NILL	5.4	48	18.2	NO	NO	NONE	< 7hrs	NO	NO	NONVEGETARIAN	URBAN	NUCLAR	99.72	POSITIVE	2.47	POSITIVE	#N/A	#N/A	#N/A	#N/A
608	JYOTHSNA SAI	Female	21	INTERNEE	O GROUP	Rh+VE	Doctor/Clinician	YES	Covaxin	35	None	YES	Mild	Yes	NILL	5.4	61	23.1	NO	NO	NONE	< 7hrs	NO	NO	NONVEGETARIAN	URBAN	SINGLE	93.59	POSITIVE	1.26	NEGATIVE	#N/A	#N/A	#N/A	#N/A
609	MOUNIKA	Female	25	INTERNEE	O GROUP	Rh+VE	Doctor/Clinician	YES	COVISHEILD	30	Fever	No	NA	Yes	NILL	5.1	55	22.9	NO	NO	NONE	7-8hrs	NO	NO	NONVEGETARIAN	URBAN	SINGLE	99.02	POSITIVE	2.79	POSITIVE	#N/A	#N/A	#N/A	#N/A
610	DEEPTHI	Female	24	INTERNEE	O GROUP	Rh+VE	Doctor/Clinician	YES	COVISHEILD	30	Myalgia,Headache	No	NA	Yes	NILL	5.6	50	17.8	NO	NO	NONE	< 7hrs	NO	NO	NONVEGETARIAN	URBAN	SINGLE	98.76	POSITIVE	3.64	POSITIVE	#N/A	#N/A	#N/A	#N/A
611	MANJUNATH	Male	35	TUTOR	O GROUP	Rh+VE	Svims Administrative Staff	YES	COVISHEILD	84	Fever	No	NA	Yes	NILL	5.2	60	24.2	NO	NO	NONE	< 7hrs	NO	NO	NONVEGETARIAN	URBAN	NUCLAR	99.67	POSITIVE	6.68	POSITIVE	98.5652	POSITIVE	26.3426	POSITIVE
612	SUBRAMANYAM REDDY	Male	49	ATTENDER	O GROUP	Rh+VE	Hospital support staff	YES	COVISHEILD	84	Myalgia,Fever	YES	Mild	No	NILL	5.7	78	26.9	NO	YES	NONE	< 7hrs	NO	NO	NONVEGETARIAN	URBAN	NUCLAR	99.5	POSITIVE	6.45	POSITIVE	94.2786	POSITIVE	46.4308	POSITIVE
613	SHAMEEM	Female	33	ASSISTANT PROFESSOR	A GROUP	Rh+VE	Doctor/Clinician	No	not vaccinated	na	None	No	NA	Yes	NILL	5.6	92	32.7	NO	NO	DAILY	7-8hrs	NO	NO	NONVEGETARIAN	URBAN	NUCLAR	54.67	POSITIVE	0.94	NEGATIVE	#N/A	#N/A	#N/A	#N/A
614	SRI KUMARI	Female	51	ASSOCIATE PROFESSOR	O GROUP	Rh-VE	Doctor/Clinician	No	not vaccinated	na	None	YES	Mild	Yes	NILL	5.4	65	24.6	NO	NO	NONE	< 7hrs	NO	NO	NONVEGETARIAN	URBAN	NUCLAR	98.35	POSITIVE	9.34	POSITIVE	96.23	POSITIVE	35.21	POSITIVE
615	JAHNAVI	Female	35	CLINICAL PHYSIOTHERAPIST	O GROUP	Rh+VE	Doctor/Clinician	YES	COVISHEILD	65	None	No	NA	Yes	NILL	5.2	68	27.4	NO	NO	WEEKLY	< 7hrs	NO	NO	NONVEGETARIAN	URBAN	NUCLAR	99.5	POSITIVE	3.69	POSITIVE	#N/A	#N/A	#N/A	#N/A
616	ASHA JYOTHI	Female	35	CLINICAL PHYSIOTHERAPIST	A GROUP	Rh+VE	Doctor/Clinician	YES	COVISHEILD	35	None	No	NA	Yes	NILL	5	54	23.3	NO	NO	WEEKLY	< 7hrs	NO	NO	NONVEGETARIAN	URBAN	NUCLAR	78.81	POSITIVE	0.5	NEGATIVE	#N/A	#N/A	#N/A	#N/A
617	SAI DINESH	Male	25	STUDENT	B GROUP	Rh+VE	OTHERS	YES	COVISHEILD	84	Myalgia	YES	Asymptomatic	Yes	NILL	5.7	61	21.1	NO	NO	NONE	< 7hrs	NO	NO	NONVEGETARIAN	URBAN	SINGLE	99.24	POSITIVE	3.25	POSITIVE	#N/A	#N/A	#N/A	#N/A
618	ARCHANA	Female	36	CLINICAL PHYSIOTHERAPIST	O GROUP	Rh+VE	Doctor/Clinician	YES	COVISHEILD	28	None	No	NA	Yes	NILL	5.5	60	22	NO	NO	NONE	7-8hrs	NO	NO	VEGETARIAN	URBAN	NUCLAR	96.15	POSITIVE	3.67	POSITIVE	#N/A	#N/A	#N/A	#N/A
619	SIVA KUMAR	Male	39	CLINICAL PHYSIOTHERAPIST	B GROUP	Rh+VE	Doctor/Clinician	YES	COVISHEILD	28	None	No	NA	Yes	NILL	5.6	64	22.8	NO	NO	DAILY	< 7hrs	NO	NO	NONVEGETARIAN	URBAN	NUCLAR	99.67	POSITIVE	6.03	POSITIVE	#N/A	#N/A	#N/A	#N/A
620	LOKESWARA REDDY	Male	44	CHIEF MEDICAL OFFICER	A GROUP	Rh+VE	Doctor/Clinician	YES	COVISHEILD	42	None	YES	Moderate	Yes	NILL	5.5	94	34.5	NO	NO	WEEKLY	< 7hrs	YES	YES	NONVEGETARIAN	URBAN	NUCLAR	99.15	POSITIVE	5.2	POSITIVE	#N/A	#N/A	#N/A	#N/A
621	KRISHNAVENI	Female	43	SENIOR RESIDENT	B GROUP	Rh+VE	Doctor/Clinician	YES	COVISHEILD	45	None	No	NA	Yes	NILL	5.4	62	23.5	NO	NO	NONE	7-8hrs	NO	NO	NONVEGETARIAN	URBAN	NUCLAR	99.27	POSITIVE	7.66	POSITIVE	#N/A	#N/A	#N/A	#N/A
622	HARI PRIYA	Female	24	STUDENT	B GROUP	Rh+VE	OTHERS	YES	COVISHEILD	32	None	No	NA	Yes	NILL	5.2	61	24.6	NO	NO	DAILY	7-8hrs	NO	NO	NONVEGETARIAN	URBAN	NUCLAR	98.68	POSITIVE	3.14	POSITIVE	#N/A	#N/A	#N/A	#N/A
623	GNANESWARI	Female	24	INTERNEE	A GROUP	Rh+VE	Doctor/Clinician	YES	COVISHEILD	40	Fever	No	NA	Yes	NILL	5.2	64	25.8	NO	NO	NONE	< 7hrs	NO	NO	NONVEGETARIAN	URBAN	SINGLE	95.83	POSITIVE	0.7	NEGATIVE	#N/A	#N/A	#N/A	#N/A
624	JANARDHAN	Male	23	PA	O GROUP	Rh+VE	Svims Administrative Staff	YES	COVISHEILD	30	None	YES	Mild	No	NILL	5.7	85	29.3	NO	NO	DAILY	< 7hrs	NO	NO	NONVEGETARIAN	URBAN	SINGLE	99.7	POSITIVE	4.82	POSITIVE	95.8209	POSITIVE	39.889	POSITIVE
625	KAVITHA	Female	38	STAFF NURSE	B GROUP	Rh+VE	Nurse	YES	COVISHEILD	84	None	No	NA	Yes	NILL	5	56	24.1	NO	NO	NONE	< 7hrs	NO	NO	NONVEGETARIAN	URBAN	NUCLAR	99.67	POSITIVE	9.07	POSITIVE	#N/A	#N/A	#N/A	#N/A
626	SONIYA	Female	23	INTERNEE	O GROUP	Rh+VE	Doctor/Clinician	YES	COVISHEILD	30	None	No	NA	Yes	NILL	5.4	55	20.8	NO	NO	NONE	< 7hrs	NO	NO	NONVEGETARIAN	URBAN	SINGLE	90.71	POSITIVE	2.2	POSITIVE	#N/A	#N/A	#N/A	#N/A
627	ANGEL	Female	25	INTERNEE	B GROUP	Rh+VE	Doctor/Clinician	YES	COVISHEILD	34	None	No	NA	Yes	NILL	5.5	63	23.1	NO	NO	DAILY	< 7hrs	NO	NO	NONVEGETARIAN	URBAN	SINGLE	94.54	POSITIVE	1.48	NEGATIVE	#N/A	#N/A	#N/A	#N/A
628	SARALA	Female	33	D.E.O	B GROUP	Rh+VE	Svims Administrative Staff	YES	COVISHEILD	40	None	No	NA	No	NILL	5.2	52	21	NO	NO	DAILY	< 7hrs	NO	NO	NONVEGETARIAN	URBAN	NUCLAR	98.12	POSITIVE	3.29	POSITIVE	#N/A	#N/A	#N/A	#N/A
629	MANJULA	Female	43	PA	O GROUP	Rh+VE	Svims Administrative Staff	YES	COVISHEILD	45	Fever,Myalgia,Headache	No	NA	No	NILL	5.2	58	23.4	NO	NO	NONE	< 7hrs	NO	NO	NONVEGETARIAN	URBAN	NUCLAR	98.75	POSITIVE	5.07	POSITIVE	#N/A	#N/A	#N/A	#N/A
630	BHAGYA LAKSHMI	Female	52	STAFF NURSE	O GROUP	Rh+VE	Nurse	YES	COVISHEILD	28	None	No	NA	Yes	NILL	5.4	55	20.8	NO	NO	DAILY	< 7hrs	NO	NO	NONVEGETARIAN	URBAN	NUCLAR	64.87	POSITIVE	0.6	NEGATIVE	#N/A	#N/A	#N/A	#N/A
631	JHANSI RANI	Female	53	STAFF NURSE	O GROUP	Rh+VE	Nurse	YES	COVISHEILD	30	Fever,Myalgia,Headache	YES	Asymptomatic	Yes	NILL	5.4	70	26.5	NO	NO	NONE	< 7hrs	YES	NO	NONVEGETARIAN	URBAN	NUCLAR	99.84	POSITIVE	5.2	POSITIVE	#N/A	#N/A	#N/A	#N/A
632	NAVEEN	Male	35	RADIOGRAPHER	O GROUP	Rh+VE	Doctor/Clinician	YES	COVISHEILD	84	None	No	NA	Yes	NILL	5.8	65	21.8	NO	NO	DAILY	< 7hrs	NO	NO	NONVEGETARIAN	URBAN	NUCLAR	99.01	POSITIVE	1.38	NEGATIVE	96.6701	POSITIVE	43.5235	POSITIVE
633	FAHIMA SULTHANA	Female	22	DIALYSIS TECHNICIAN	O GROUP	Rh+VE	Laboratory Technician	YES	COVISHEILD	45	Fever,Myalgia	YES	Asymptomatic	Yes	NILL	5.6	57	20.3	NO	NO	NONE	< 7hrs	NO	NO	NONVEGETARIAN	URBAN	SINGLE	99.56	POSITIVE	5.82	POSITIVE	#N/A	#N/A	#N/A	#N/A
634	VAHIDHA	Female	26	DIALYSIS TECHNICIAN	O GROUP	Rh+VE	Laboratory Technician	YES	COVISHEILD	31	None	No	NA	Yes	NILL	5.4	47	17.8	NO	NO	NONE	< 7hrs	NO	NO	NONVEGETARIAN	URBAN	SINGLE	99.11	POSITIVE	4.51	POSITIVE	#N/A	#N/A	#N/A	#N/A
635	HEMA LATHA	Female	40	DIALYSIS TECHNICIAN	A GROUP	Rh+VE	Laboratory Technician	YES	COVISHEILD	30	Myalgia	No	NA	Yes	NILL	5.3	59	23	NO	NO	NONE	< 7hrs	NO	NO	VEGETARIAN	URBAN	NUCLAR	85.55	POSITIVE	1.04	NEGATIVE	#N/A	#N/A	#N/A	#N/A
636	YAMUNA	Female	22	DIALYSIS TECHNICIAN	B GROUP	Rh+VE	Laboratory Technician	YES	COVISHEILD	84	Fever,Myalgia	YES	Asymptomatic	Yes	NILL	5.5	40	14.7	NO	NO	NONE	< 7hrs	NO	NO	NONVEGETARIAN	URBAN	SINGLE	98.93	POSITIVE	7.86	POSITIVE	#N/A	#N/A	#N/A	#N/A
637	LATHA	Female	40	DIALYSIS TECHNICIAN	A GROUP	Rh+VE	Laboratory Technician	YES	COVISHEILD	28	Fever	No	NA	Yes	NILL	5.6	64	22.8	NO	NO	NONE	< 7hrs	NO	NO	VEGETARIAN	URBAN	NUCLAR	71.71	POSITIVE	1.23	NEGATIVE	#N/A	#N/A	#N/A	#N/A
638	MAHAMMAD	Male	35	PUBLIC HEALTH NURSE	O GROUP	Rh+VE	Hospital support staff	YES	COVISHEILD	28	None	No	NA	No	NILL	5.4	60	22.7	NO	NO	DAILY	< 7hrs	NO	NO	NONVEGETARIAN	URBAN	NUCLAR	98.24	POSITIVE	3.46	POSITIVE	#N/A	#N/A	#N/A	#N/A
639	JARIPITI	Male	34	PA	Unknown	UNKNOWN	Svims Administrative Staff	YES	COVISHEILD	35	Fever,Headache	YES	Mild	No	NILL	5.9	71	23.1	NO	NO	NONE	< 7hrs	NO	NO	NONVEGETARIAN	URBAN	NUCLAR	99.21	POSITIVE	2.93	POSITIVE	#N/A	#N/A	#N/A	#N/A
640	MURALI	Male	44	PA	A GROUP	Rh+VE	Svims Administrative Staff	YES	COVISHEILD	30	None	No	NA	No	NILL	5.7	75	25.9	NO	NO	DAILY	< 7hrs	YES	NO	NONVEGETARIAN	URBAN	NUCLAR	99.17	POSITIVE	5.84	POSITIVE	#N/A	#N/A	#N/A	#N/A
641	SUMATHI	Female	39	MATRON	O GROUP	Rh+VE	OTHERS	YES	COVISHEILD	28	None	No	NA	No	NILL	5.3	49	19.1	NO	NO	NONE	< 7hrs	NO	NO	NONVEGETARIAN	URBAN	NUCLAR	52.65	POSITIVE	3	POSITIVE	#N/A	#N/A	#N/A	#N/A
642	NIRMALA	Female	41	MATRON	B GROUP	Rh+VE	OTHERS	YES	COVISHEILD	30	Irritability	No	NA	No	NILL	5.4	52	19.7	NO	NO	DAILY	< 7hrs	NO	NO	NONVEGETARIAN	URBAN	NUCLAR	95.47	POSITIVE	5.56	POSITIVE	#N/A	#N/A	#N/A	#N/A
643	NARMADA	Female	24	INTERNEE	O GROUP	Rh+VE	Doctor/Clinician	YES	COVISHEILD	45	Fever,Headache	YES	Mild	Yes	NILL	5.6	83	29.5	NO	NO	NONE	< 7hrs	NO	NO	VEGETARIAN	URBAN	SINGLE	98.07	POSITIVE	8.81	POSITIVE	#N/A	#N/A	#N/A	#N/A
644	NEELAVATHI	Female	43	STAFF NURSE	O GROUP	Rh+VE	Nurse	YES	COVISHEILD	46	Myalgia,Fever	No	NA	Yes	NILL	5.4	63	23.8	NO	NO	NONE	< 7hrs	NO	NO	NONVEGETARIAN	URBAN	NUCLAR	91.49	POSITIVE	4.27	POSITIVE	#N/A	#N/A	#N/A	#N/A
645	SHANMUGAM	Male	32	ASSISTANT PROFESSOR	O GROUP	Rh+VE	Doctor/Clinician	YES	COVISHEILD	84	Fever,Headache,Myalgia	No	NA	Yes	NILL	5.6	82	29.2	NO	NO	NONE	< 7hrs	YES	YES	NONVEGETARIAN	URBAN	NUCLAR	92.12	POSITIVE	5.39	POSITIVE	#N/A	#N/A	#N/A	#N/A
646	PRABHANJAN KUMAR	Male	37	ASSISTANT PROFESSOR	O GROUP	Rh+VE	Doctor/Clinician	YES	COVISHEILD	45	None	YES	Mild	Yes	NILL	5.4	70	26.5	NO	NO	WEEKLY	< 7hrs	NO	NO	NONVEGETARIAN	URBAN	NUCLAR	97.76	POSITIVE	6.57	POSITIVE	#N/A	#N/A	#N/A	#N/A
647	PUNITH PATAK	Male	38	ASSOCIATE PROFESSOR	O GROUP	Rh+VE	Doctor/Clinician	YES	COVISHEILD	62	Myalgia,Fever	No	NA	Yes	NILL	5.7	67	23.1	NO	NO	NONE	< 7hrs	NO	NO	NONVEGETARIAN	URBAN	NUCLAR	92.55	POSITIVE	1.36	NEGATIVE	#N/A	#N/A	#N/A	#N/A
648	MOHITHA	Female	24	INTERNEE	O GROUP	Rh+VE	Doctor/Clinician	YES	COVISHEILD	60	Myalgia	YES	Mild	Yes	NILL	5.6	68	24.2	NO	NO	NONE	< 7hrs	NO	NO	NONVEGETARIAN	URBAN	SINGLE	97.95	POSITIVE	7.4	POSITIVE	#N/A	#N/A	#N/A	#N/A
649	JAHNAVI	Female	29	DOCTOR	B GROUP	Rh+VE	Doctor/Clinician	YES	COVISHEILD	42	Headache,Myalgia,Fever,Irritability	YES	Mild	Yes	NILL	5.4	71	26.9	NO	NO	WEEKLY	7-8hrs	NO	NO	NONVEGETARIAN	URBAN	NUCLAR	98.95	POSITIVE	10.3	POSITIVE	#N/A	#N/A	#N/A	#N/A
650	PAVITHRA	Female	21	STUDENT	O GROUP	Rh+VE	OTHERS	No	not vaccinated	na	None	YES	Mild	No	NILL	4.8	48	23.7	NO	NO	NONE	< 7hrs	NO	NO	NONVEGETARIAN	URBAN	SINGLE	56.23	POSITIVE	5.57	POSITIVE	98.23	POSITIVE	41.21	POSITIVE
651	RADHA	Female	54	ANM	O GROUP	Rh+VE	Nurse	YES	COVISHEILD	30	Fever,Myalgia,Headache	YES	Moderate	Yes	NILL	5.2	58	23.4	NO	NO	DAILY	< 7hrs	NO	NO	NONVEGETARIAN	URBAN	NUCLAR	96.37	POSITIVE	4.25	POSITIVE	#N/A	#N/A	#N/A	#N/A
652	SRIDEVI	Female	39	STAFF NURSE	A GROUP	Rh+VE	Nurse	YES	COVISHEILD	84	Myalgia,Fever	YES	Mild	Yes	NILL	5.6	65	23.1	NO	NO	NONE	< 7hrs	NO	NO	NONVEGETARIAN	URBAN	NUCLAR	99.21	POSITIVE	8.22	POSITIVE	#N/A	#N/A	#N/A	#N/A
653	VARA LAKSHMI	Female	39	STAFF NURSE	O GROUP	Rh+VE	Nurse	YES	COVISHEILD	84	None	No	NA	Yes	NILL	5.6	70	24.9	NO	NO	NONE	< 7hrs	NO	NO	NONVEGETARIAN	URBAN	NUCLAR	99.49	POSITIVE	11.23	POSITIVE	#N/A	#N/A	#N/A	#N/A
654	SREE VIDYA	Female	23	STAFF NURSE	B GROUP	Rh+VE	Nurse	YES	COVISHEILD	84	Myalgia	YES	Asymptomatic	Yes	NILL	5	49	21.1	NO	NO	NONE	< 7hrs	NO	NO	NONVEGETARIAN	URBAN	SINGLE	98.31	POSITIVE	8.83	POSITIVE	#N/A	#N/A	#N/A	#N/A
655	VIJAYA SEKAR	Male	50	SECURITY SUPERVISOR	B GROUP	Rh+VE	Hospital support staff	YES	Covaxin	62	Fever,Myalgia	YES	Mild	No	NILL	5.7	95	32.8	NO	NO	NONE	< 7hrs	NO	NO	NONVEGETARIAN	URBAN	NUCLAR	99	POSITIVE	9.12	POSITIVE	#N/A	#N/A	#N/A	#N/A
656	VINODH	Male	28	SECURITY GAURD	B GROUP	Rh+VE	Hospital support staff	YES	COVISHEILD	84	Myalgia	No	NA	No	NILL	5.6	59	21	NO	NO	DAILY	< 7hrs	NO	NO	NONVEGETARIAN	URBAN	SINGLE	98.45	POSITIVE	9.91	POSITIVE	#N/A	#N/A	#N/A	#N/A
657	PRASANNA KUMARI	Female	36	STAFF NURSE	O GROUP	Rh+VE	Nurse	YES	COVISHEILD	54	Myalgia	YES	Mild	Yes	NILL	5.4	69	26.1	NO	NO	NONE	< 7hrs	NO	NO	NONVEGETARIAN	URBAN	NUCLAR	98.93	POSITIVE	8.41	POSITIVE	#N/A	#N/A	#N/A	#N/A
658	VARA PRASAD	Male	48	PA	O GROUP	Rh+VE	Svims Administrative Staff	No	not vaccinated	na	None	YES	Mild	No	NILL	5.3	78	30.5	NO	NO	DAILY	< 7hrs	NO	NO	NONVEGETARIAN	URBAN	NUCLAR	83.91	POSITIVE	9.33	POSITIVE	97.23	POSITIVE	38.23	POSITIVE
659	JAYA RAMAN	Male	62	SECURITY SUPERVISOR	O GROUP	Rh+VE	Hospital support staff	YES	COVISHEILD	84	None	YES	Mild	No	NILL	5.8	96	32.2	NO	NO	DAILY	< 7hrs	NO	NO	NONVEGETARIAN	URBAN	NUCLAR	98.96	POSITIVE	10.83	POSITIVE	#N/A	#N/A	#N/A	#N/A
660	ANIL KUMAR	Male	29	SECURITY GAURD	O GROUP	Rh+VE	Hospital support staff	YES	Covaxin	40	None	No	NA	No	NILL	6	68	20.3	NO	NO	NONE	< 7hrs	NO	NO	NONVEGETARIAN	URBAN	NUCLAR	99.59	POSITIVE	18.64	POSITIVE	#N/A	#N/A	#N/A	#N/A
661	SREENIVASULU	Male	25	SECURITY GAURD	O GROUP	Rh-VE	Hospital support staff	YES	Covaxin	32	None	YES	Asymptomatic	No	NILL	5.2	68	27.4	NO	NO	DAILY	< 7hrs	NO	NO	NONVEGETARIAN	URBAN	SINGLE	96.42	POSITIVE	2.87	POSITIVE	#N/A	#N/A	#N/A	#N/A
662	AYESHA	Female	22	STAFF NURSE	B GROUP	Rh+VE	Nurse	YES	COVISHEILD	84	Fever	YES	Asymptomatic	Yes	NILL	5.2	50	20.2	NO	NO	NONE	< 7hrs	NO	NO	NONVEGETARIAN	URBAN	NUCLAR	98.61	POSITIVE	7.46	POSITIVE	#N/A	#N/A	#N/A	#N/A
663	NAZEERA BEGAM	Female	27	LAB TECHNICIAN	O GROUP	Rh+VE	Laboratory Technician	YES	COVISHEILD	84	Fever,Myalgia,Headache	YES	Mild	Yes	NILL	5.3	62	24.2	NO	NO	NONE	> 8hrs	NO	NO	NONVEGETARIAN	URBAN	NUCLAR	98.51	POSITIVE	8.04	POSITIVE	#N/A	#N/A	#N/A	#N/A
664	VENKATESH	Male	37	LAB TECHNICIAN	B GROUP	Rh+VE	Laboratory Technician	YES	COVISHEILD	84	None	No	NA	Yes	NILL	5.2	58	23.4	NO	NO	DAILY	< 7hrs	NO	NO	NONVEGETARIAN	URBAN	NUCLAR	63.64	POSITIVE	0.78	NEGATIVE	#N/A	#N/A	#N/A	#N/A
665	LOKESHWARA	Male	27	SECURITY GAURD	O GROUP	Rh+VE	Hospital support staff	YES	COVISHEILD	42	None	No	NA	No	NILL	6.2	80	22.6	NO	NO	DAILY	< 7hrs	NO	NO	NONVEGETARIAN	URBAN	NUCLAR	42.51	NEGATIVE	0.54	NEGATIVE	#N/A	#N/A	#N/A	#N/A
666	JHANSI RANI	Female	32	SECURITY GAURD	O GROUP	Rh+VE	Hospital support staff	YES	COVISHEILD	42	None	No	NA	No	NILL	5	50	21.5	NO	NO	NONE	< 7hrs	NO	NO	NONVEGETARIAN	URBAN	NUCLAR	97.91	POSITIVE	4.03	POSITIVE	#N/A	#N/A	#N/A	#N/A
667	LAVANYA	Female	27	SENIOR RESIDENT	O GROUP	Rh+VE	Doctor/Clinician	YES	COVISHEILD	43	None	YES	Mild	Yes	NILL	5	75	32.3	NO	NO	DAILY	< 7hrs	NO	NO	NONVEGETARIAN	URBAN	NUCLAR	99.39	POSITIVE	5.7	POSITIVE	#N/A	#N/A	#N/A	#N/A
668	MADHUVANTHINI	Female	32	JUNIOR RESIDENT	B GROUP	Rh+VE	Doctor/Clinician	YES	COVISHEILD	65	Fever,Myalgia	YES	Mild	Yes	NILL	5	70	30.1	NO	NO	DAILY	< 7hrs	NO	NO	VEGETARIAN	URBAN	NUCLAR	99.51	POSITIVE	5.45	POSITIVE	#N/A	#N/A	#N/A	#N/A
669	NAGA SOWMYA	Female	26	JUNIOR RESIDENT	O GROUP	Rh+VE	Researchers	YES	COVISHEILD	60	Fever	No	NA	Yes	NILL	5.4	65	24.6	NO	NO	NONE	< 7hrs	YES	NO	VEGETARIAN	URBAN	NUCLAR	98.61	POSITIVE	7.51	POSITIVE	#N/A	#N/A	#N/A	#N/A
670	ARCHANA	Female	27	JUNIOR RESIDENT	AB GROUP	Rh+VE	Researchers	YES	Covaxin	28	Fever,Myalgia	YES	Mild	Yes	NILL	5.2	60	24.2	NO	NO	NONE	< 7hrs	NO	NO	NONVEGETARIAN	URBAN	NUCLAR	93.48	POSITIVE	7.88	POSITIVE	#N/A	#N/A	#N/A	#N/A
671	THIRUVENGADAM	Male	52	SECURITY GAURD	O GROUP	Rh+VE	Hospital support staff	YES	COVISHEILD	84	None	No	NA	No	NILL	5.6	78	27.8	NO	NO	NONE	< 7hrs	NO	NO	NONVEGETARIAN	URBAN	NUCLAR	98.75	POSITIVE	9.87	POSITIVE	#N/A	#N/A	#N/A	#N/A
672	NAGARAJA	Male	37	RESEARCH SCIENTIST	O GROUP	Rh+VE	Researchers	YES	COVISHEILD	50	Headache,Myalgia	No	NA	No	NILL	5.7	64	22.1	NO	NO	WEEKLY	< 7hrs	YES	YES	NONVEGETARIAN	URBAN	NUCLAR	84.32	POSITIVE	1.03	NEGATIVE	95.3109	POSITIVE	38.7041	POSITIVE
673	MADHAVI	Female	39	SECURITY GAURD	O GROUP	Rh+VE	Hospital support staff	YES	COVISHEILD	45	Fever	No	NA	No	NILL	5.4	53	20.1	NO	NO	NONE	7-8hrs	NO	NO	NONVEGETARIAN	URBAN	NUCLAR	99.41	POSITIVE	12.87	POSITIVE	#N/A	#N/A	#N/A	#N/A
674	INDIRA	Female	48	WORKER	Unknown	UNKNOWN	Hospital support staff	YES	Covaxin	32	None	No	NA	Yes	NILL	5.4	66	25	NO	NO	NONE	< 7hrs	NO	NO	NONVEGETARIAN	URBAN	NUCLAR	99.21	POSITIVE	8.24	POSITIVE	#N/A	#N/A	#N/A	#N/A
675	Aparna R	Female	46	Professor and Head	B GROUP	Rh+VE	Doctor/Clinician	YES	COVISHEILD	28	Myalgia	No	NA	No	NILL	5.2	57	21.6	NO	NO	DAILY	7-8hrs	NO	NO	VEGETARIAN	URBAN	NUCLAR	97.46	POSITIVE	0.42	NEGATIVE	#N/A	#N/A	#N/A	#N/A
676	Kiranmayi	Female	47	Associate Professor	O GROUP	Rh+VE	Doctor/Clinician	YES	COVISHEILD	39	Myalgia	No	NA	No	NILL	5.2	65	26.2	NO	NO	WEEKLY	< 7hrs	NO	NO	VEGETARIAN	URBAN	GAINT FAMILY	98.92	POSITIVE	1.37	NEGATIVE	#N/A	#N/A	#N/A	#N/A
677	Kusuma	Female	43	Assistant Professor	O GROUP	Rh+VE	Doctor/Clinician	YES	COVISHEILD	29	Fever,Myalgia	No	NA	No	NILL	5.6	75	26.7	NO	NO	NONE	7-8hrs	NO	NO	VEGETARIAN	URBAN	NUCLAR	98.16	POSITIVE	10.74	POSITIVE	#N/A	#N/A	#N/A	#N/A
678	KRISHNAMURTHY	Male	53	ADVOCATE	B GROUP	Rh+VE	OTHERS	YES	Covaxin	32	None	No	NA	No	NILL	5	56	24.1	NO	NO	DAILY	< 7hrs	NO	YES	NONVEGETARIAN	URBAN	NUCLAR	96.99	POSITIVE	1.35	NEGATIVE	#N/A	#N/A	#N/A	#N/A
679	LAKSHMI	Female	43	WARD BOY	B GROUP	Rh+VE	Hospital support staff	YES	COVISHEILD	84	None	YES	Mild	No	NILL	5.2	75	30.2	NO	NO	NONE	< 7hrs	NO	NO	NONVEGETARIAN	URBAN	NUCLAR	98.43	POSITIVE	6.81	POSITIVE	#N/A	#N/A	#N/A	#N/A
680	RAVI	Male	37	LAB TECHNICIAN	B GROUP	Rh+VE	Laboratory Technician	YES	COVISHEILD	36	None	YES	Mild	Yes	NILL	5.6	79	28.1	NO	NO	NONE	< 7hrs	NO	NO	NONVEGETARIAN	URBAN	NUCLAR	98.25	POSITIVE	3.6	POSITIVE	#N/A	#N/A	#N/A	#N/A
681	RUPA NAYAK	Male	37	LAB TECHNICIAN	O GROUP	Rh+VE	Laboratory Technician	YES	COVISHEILD	42	Fever,Myalgia	No	NA	Yes	NILL	5	65	28	NO	NO	DAILY	< 7hrs	NO	YES	NONVEGETARIAN	URBAN	NUCLAR	99.37	POSITIVE	6.1	POSITIVE	#N/A	#N/A	#N/A	#N/A
682	DEVA KUMAR	Male	47	SECURITY GAURD	B GROUP	Rh+VE	Hospital support staff	YES	Covaxin	48	None	No	NA	No	NILL	5.6	90	32	YES	YES	NONE	< 7hrs	NO	NO	NONVEGETARIAN	URBAN	NUCLAR	99.25	POSITIVE	1.37	NEGATIVE	#N/A	#N/A	#N/A	#N/A
683	MUNI RAJA	Male	36	SECURITY GAURD	Unknown	UNKNOWN	Hospital support staff	YES	Covaxin	42	None	No	NA	No	NILL	5.8	78	26.1	NO	NO	NONE	< 7hrs	NO	NO	NONVEGETARIAN	URBAN	NUCLAR	99.69	POSITIVE	12.27	POSITIVE	#N/A	#N/A	#N/A	#N/A
684	SUNDAR RAJ	Male	51	CAMP CO ORDINATOR	B GROUP	Rh+VE	Hospital support staff	YES	COVISHEILD	28	None	No	NA	No	NILL	5.5	66	24.2	NO	NO	NONE	< 7hrs	NO	NO	NONVEGETARIAN	URBAN	NUCLAR	99.7	POSITIVE	7.47	POSITIVE	#N/A	#N/A	#N/A	#N/A
685	DILLI	Female	41	STAFF NURSE	O GROUP	Rh+VE	Nurse	No	not vaccinated	na	None	YES	Mild	Yes	NILL	5.2	70	28.2	NO	NO	NONE	< 7hrs	NO	NO	NONVEGETARIAN	URBAN	NUCLAR	77.11	POSITIVE	1.29	NEGATIVE	98.56	POSITIVE	38.26	POSITIVE
686	KUMAR	Male	39	LAB TECHNICIAN	O GROUP	Rh+VE	Laboratory Technician	YES	COVISHEILD	45	Fever	YES	Severe	Yes	NILL	5.4	85	32.2	NO	YES	WEEKLY	< 7hrs	YES	NO	NONVEGETARIAN	URBAN	NUCLAR	98.54	POSITIVE	7.85	POSITIVE	#N/A	#N/A	#N/A	#N/A
687	GOVINDASWAMY	Male	41	SECURITY GAURD	Unknown	UNKNOWN	OTHERS	YES	COVISHEILD	NA	None	No	NA	No	NILL	5.7	75	25.9	NO	NO	DAILY	7-8hrs	NO	NO	NONVEGETARIAN	RURAL	NUCLAR	98.9	POSITIVE	5.72	POSITIVE	#N/A	#N/A	#N/A	#N/A
688	ARPHANA	Female	39	DOCTOR	A GROUP	Rh+VE	Doctor/Clinician	YES	COVISHEILD	30	Headache,Myalgia	No	NA	No	NILL	5.5	55	20.2	NO	NO	DAILY	< 7hrs	NO	NO	VEGETARIAN	URBAN	NUCLAR	48.48	NEGATIVE	1.21	NEGATIVE	#N/A	#N/A	#N/A	#N/A
689	Srikar	Male	31	Scholar	O GROUP	Rh+VE	Researchers	YES	COVISHEILD	60	None	No	NA	Yes	NILL	5.11	73	22.4	NO	NO	DAILY	< 7hrs	NO	NO	NONVEGETARIAN	URBAN	SINGLE	98.63	POSITIVE	5.42	POSITIVE	95.5473	POSITIVE	32.7112	POSITIVE
690	VANI	Female	44	DATA ENTRY OPERATOR	B GROUP	Rh+VE	OTHERS	YES	COVISHEILD	84	None	No	NA	No	NILL	5.4	65	24.6	NO	NO	DAILY	< 7hrs	NO	NO	NONVEGETARIAN	URBAN	NUCLAR	99.5	POSITIVE	8.82	POSITIVE	#N/A	#N/A	#N/A	#N/A
691	RAJESWARI	Female	23	DEO	Unknown	UNKNOWN	OTHERS	No	not vaccinated	na	None	No	NA	No	NILL	5.5	49	18	NO	NO	NONE	< 7hrs	NO	NO	NONVEGETARIAN	URBAN	NUCLAR	99.6	POSITIVE	10.96	POSITIVE	#N/A	#N/A	#N/A	#N/A
692	KUMAR	Male	32	PA ( DENTAL SURGERY)	Unknown	UNKNOWN	OTHERS	YES	COVISHEILD	60	Myalgia,Headache,Fever	No	NA	No	NILL	5.6	65	23.1	NO	NO	DAILY	7-8hrs	NO	NO	NONVEGETARIAN	URBAN	NUCLAR	99.49	POSITIVE	7.48	POSITIVE	#N/A	#N/A	#N/A	#N/A
693	PADMAGIRI	Male	40	FITTER ( ENG-SECTION )	B GROUP	Rh+VE	OTHERS	YES	Covaxin	58	None	No	NA	No	NILL	5.2	49	19.8	NO	NO	DAILY	< 7hrs	NO	NO	NONVEGETARIAN	URBAN	NUCLAR	56.03	POSITIVE	1.04	NEGATIVE	#N/A	#N/A	#N/A	#N/A
694	OVIYA	Female	25	PA ( AROGYASREE)	B GROUP	Rh+VE	Hospital support staff	YES	COVISHEILD	NA	Fever,Headache,Myalgia	No	NA	No	NILL	5	48	20.7	NO	NO	NONE	7-8hrs	NO	NO	NONVEGETARIAN	URBAN	NUCLAR	99.71	POSITIVE	10.88	POSITIVE	#N/A	#N/A	#N/A	#N/A
695	CHARAN KUMAR	Male	31	LAB TECHNICIAN	B GROUP	Rh+VE	Laboratory Technician	YES	COVISHEILD	NA	None	YES	Moderate	Yes	NILL	5.6	78	27.8	NO	NO	DAILY	7-8hrs	NO	NO	NONVEGETARIAN	URBAN	NUCLAR	99.63	POSITIVE	15.55	POSITIVE	#N/A	#N/A	#N/A	#N/A
696	SRAVANI	Female	26	LAB TECHNICIAN	O GROUP	Rh+VE	Laboratory Technician	YES	COVISHEILD	84	Fever,Headache,Myalgia	No	NA	Yes	NILL	5	49	21.1	NO	NO	NONE	7-8hrs	NO	NO	NONVEGETARIAN	URBAN	NUCLAR	98.36	POSITIVE	6.24	POSITIVE	#N/A	#N/A	#N/A	#N/A
697	SWARNALATHA	Female	27	STAFF NURSE	O GROUP	Rh+VE	Nurse	YES	COVISHEILD	NA	Fever,Headache	No	NA	No	NILL	5.6	52	18.5	NO	NO	NONE	7-8hrs	NO	NO	NONVEGETARIAN	URBAN	NUCLAR	99.6	POSITIVE	11.84	POSITIVE	#N/A	#N/A	#N/A	#N/A
698	BHAVYA	Female	21	PHARMACIST	O GROUP	Rh+VE	Hospital support staff	YES	COVISHEILD	NA	Fever,Headache	YES	Moderate	No	NILL	5.2	45	18.1	NO	NO	NONE	> 8hrs	NO	NO	NONVEGETARIAN	URBAN	NUCLAR	52.5	POSITIVE	2.03	POSITIVE	#N/A	#N/A	#N/A	#N/A
699	HEMALATHA	Female	48	WARD BOY	Unknown	UNKNOWN	OTHERS	YES	COVISHEILD	85	Fever,Headache	YES	Mild	No	NILL	5.6	60	21.3	NO	NO	NONE	7-8hrs	YES	NO	NONVEGETARIAN	URBAN	NUCLAR	92.77	POSITIVE	3.18	POSITIVE	#N/A	#N/A	#N/A	#N/A
700	ANANDA	Male	58	WARD BOY	Unknown	UNKNOWN	OTHERS	YES	COVISHEILD	55	None	YES	Mild	Yes	NILL	5.5	70	25.7	NO	NO	DAILY	7-8hrs	NO	NO	NONVEGETARIAN	URBAN	NUCLAR	96.04	POSITIVE	4.91	POSITIVE	#N/A	#N/A	#N/A	#N/A
701	SUNITHA DEVI	Female	55	CHIEF DIETITIAN	O GROUP	Rh+VE	Hospital support staff	YES	Covaxin	25	Myalgia	YES	Moderate	Yes	NILL	5.1	64	26.7	NO	NO	DAILY	< 7hrs	NO	NO	NONVEGETARIAN	URBAN	NUCLAR	99.69	POSITIVE	11.56	POSITIVE	#N/A	#N/A	#N/A	#N/A
702	GEETHA	Female	41	DIETITIAN	AB GROUP	Rh+VE	Hospital support staff	YES	COVISHEILD	50	Myalgia	No	NA	No	NILL	5.3	60	23.4	NO	NO	DAILY	7-8hrs	NO	NO	NONVEGETARIAN	URBAN	NUCLAR	99.66	POSITIVE	12.53	POSITIVE	#N/A	#N/A	#N/A	#N/A
703	BRAHMINI	Female	31	DIETITIAN	B GROUP	Rh-VE	Hospital support staff	YES	COVISHEILD	50	Fever	YES	Moderate	Yes	NILL	5.1	55	22.9	NO	NO	DAILY	< 7hrs	NO	NO	NONVEGETARIAN	URBAN	NUCLAR	99.17	POSITIVE	6.54	POSITIVE	#N/A	#N/A	#N/A	#N/A
704	SOWJANYA	Female	39	DIETITIAN	A GROUP	Rh+VE	Hospital support staff	YES	COVISHEILD	52	Myalgia	YES	Severe	Yes	NILL	5.5	67	24.6	NO	NO	DAILY	< 7hrs	NO	NO	VEGETARIAN	URBAN	NUCLAR	99.65	POSITIVE	10.69	POSITIVE	#N/A	#N/A	#N/A	#N/A
705	KAMALAMMA	Female	52	WARD BOY	Unknown	UNKNOWN	OTHERS	YES	COVISHEILD	60	None	YES	Severe	Yes	NILL	5.5	71	26	NO	NO	DAILY	< 7hrs	NO	NO	NONVEGETARIAN	URBAN	NUCLAR	99.48	POSITIVE	8.81	POSITIVE	#N/A	#N/A	#N/A	#N/A
706	RAJASEKHAR	Male	56	A.D. P.R.O	AB GROUP	Rh+VE	Svims Administrative Staff	YES	COVISHEILD	29	Myalgia	No	NA	No	NILL	5.6	72	26.6	NO	YES	NONE	7-8hrs	NO	NO	VEGETARIAN	URBAN	NUCLAR	26.87	NEGATIVE	0.55	NEGATIVE	97.9727	POSITIVE	40.1279	POSITIVE
707	AMARENDRA RAO	Male	39	PA ( PRO)	B GROUP	Rh+VE	Svims Administrative Staff	YES	COVISHEILD	60	Myalgia	YES	Mild	No	NILL	5.7	92	31.8	NO	NO	DAILY	7-8hrs	NO	NO	NONVEGETARIAN	URBAN	NUCLAR	99.55	POSITIVE	9.15	POSITIVE	97.4129	POSITIVE	47.7327	POSITIVE
708	NAGULU	Female	45	WARD BOY	Unknown	UNKNOWN	OTHERS	YES	COVISHEILD	30	None	No	NA	Yes	NILL	5.8	68	22.8	NO	NO	WEEKLY	7-8hrs	NO	NO	NONVEGETARIAN	URBAN	NUCLAR	90.77	POSITIVE	3.46	POSITIVE	97.4683	POSITIVE	38.1158	POSITIVE
709	RAVI	Male	52	PA ( SANITORY)	O GROUP	Rh+VE	OTHERS	YES	COVISHEILD	32	None	No	NA	No	NILL	5.7	75	25.9	NO	NO	DAILY	7-8hrs	NO	NO	NONVEGETARIAN	URBAN	NUCLAR	98.72	POSITIVE	4.32	POSITIVE	74.4652	POSITIVE	8.18138	POSITIVE
710	SUNIL KUMAR	Male	33	SR.RESIDENT MEDICINE	B GROUP	Rh+VE	Doctor/Clinician	YES	COVISHEILD	40	None	YES	Severe	Yes	NILL	5.9	85	27.7	NO	NO	DAILY	7-8hrs	NO	NO	NONVEGETARIAN	URBAN	NUCLAR	99.1	POSITIVE	4.91	POSITIVE	98.8884	POSITIVE	48.2509	POSITIVE
711	MANASA	Female	28	DOCTOR	B GROUP	Rh+VE	Doctor/Clinician	YES	COVISHEILD	28	Fever,Myalgia	No	NA	Yes	NILL	5.5	64	23.8	NO	NO	WEEKLY	7-8hrs	NO	NO	VEGETARIAN	URBAN	NUCLAR	67.71	POSITIVE	2.15	POSITIVE	#N/A	#N/A	#N/A	#N/A
712	GANESH BABU	Male	43	ATTENDER ( PRO OFFICE)	AB GROUP	Rh+VE	OTHERS	YES	COVISHEILD	60	Myalgia,Headache,Fever	No	NA	No	NILL	5.5	64	23.5	NO	NO	DAILY	7-8hrs	NO	YES	NONVEGETARIAN	URBAN	NUCLAR	93.28	POSITIVE	2.56	POSITIVE	98.7366	POSITIVE	46.6659	POSITIVE
713	BHARGAVI	Female	28	DIETITIAN	O GROUP	Rh+VE	Hospital support staff	YES	COVISHEILD	45	None	No	NA	Yes	NILL	4.9	45	21.5	NO	NO	DAILY	7-8hrs	NO	NO	NONVEGETARIAN	URBAN	SINGLE	42.006	NEGATIVE	0.8	NEGATIVE	#N/A	#N/A	#N/A	#N/A
714	ESWARAMMA	Female	52	WARD BOY	Unknown	UNKNOWN	OTHERS	YES	COVISHEILD	60	None	YES	Severe	No	NILL	5.5	63	23.1	NO	NO	NONE	< 7hrs	NO	NO	NONVEGETARIAN	URBAN	NUCLAR	99.47	POSITIVE	16.84	POSITIVE	#N/A	#N/A	#N/A	#N/A
715	SUSEELA	Female	58	HEAD NURSE	B GROUP	Rh+VE	Nurse	YES	COVISHEILD	84	Headache	YES	Moderate	Yes	NILL	5.2	75	30.2	NO	NO	DAILY	< 7hrs	NO	YES	NONVEGETARIAN	URBAN	NUCLAR	99.57	POSITIVE	11.43	POSITIVE	#N/A	#N/A	#N/A	#N/A
716	NEERAJA	Female	43	DEO ( AROGYASREE)	O GROUP	Rh+VE	Hospital support staff	YES	COVISHEILD	31	None	YES	Severe	No	NILL	5.2	72	29	NO	NO	DAILY	< 7hrs	NO	NO	NONVEGETARIAN	URBAN	NUCLAR	96.98	POSITIVE	4.87	POSITIVE	#N/A	#N/A	#N/A	#N/A
717	RAMYA	Female	34	DEO ( AROGYASREE)	A GROUP	Rh+VE	Hospital support staff	YES	COVISHEILD	NA	Fever	No	NA	No	NILL	5.4	69	26.1	NO	NO	NONE	< 7hrs	NO	NO	NONVEGETARIAN	URBAN	NUCLAR	99.37	POSITIVE	9.07	POSITIVE	#N/A	#N/A	#N/A	#N/A
718	VARALAKSHMI	Female	44	DEO ( AROGYASREE)	A GROUP	Rh-VE	Hospital support staff	YES	COVISHEILD	42	Fever,Myalgia	No	NA	Yes	NILL	5.5	68	24.9	NO	NO	DAILY	< 7hrs	NO	NO	NONVEGETARIAN	URBAN	NUCLAR	98.49	POSITIVE	4.64	POSITIVE	#N/A	#N/A	#N/A	#N/A
719	ROHITH GUPTA	Male	34	DOCTOR ( EMERGENCY)	O GROUP	Rh+VE	Doctor/Clinician	YES	COVISHEILD	34	Fever	YES	Moderate	Yes	NILL	5.5	74	27.1	NO	NO	DAILY	7-8hrs	YES	NO	NONVEGETARIAN	URBAN	NUCLAR	99.63	POSITIVE	9.24	POSITIVE	#N/A	#N/A	#N/A	#N/A
720	BHARGAVI	Female	32	DOCTOR	O GROUP	Rh+VE	Doctor/Clinician	YES	Covaxin	31	None	No	NA	Yes	NILL	5.4	53	20.1	NO	NO	DAILY	7-8hrs	NO	NO	NONVEGETARIAN	URBAN	NUCLAR	28.17	NEGATIVE	0.82	NEGATIVE	#N/A	#N/A	#N/A	#N/A
721	RAMAKRISHNA	Male	38	DOCTOR	O GROUP	Rh+VE	Doctor/Clinician	YES	Covaxin	31	None	No	NA	Yes	NILL	5.7	70	24.2	NO	NO	DAILY	7-8hrs	NO	NO	NONVEGETARIAN	URBAN	NUCLAR	33.35	NEGATIVE	0.96	NEGATIVE	#N/A	#N/A	#N/A	#N/A
722	SAI SILPA	Female	31	DOCTOR	O GROUP	Rh+VE	Doctor/Clinician	YES	Covaxin	33	None	No	NA	Yes	NILL	5.3	88	34.4	NO	NO	WEEKLY	< 7hrs	NO	NO	VEGETARIAN	URBAN	NUCLAR	37.6	NEGATIVE	1.26	NEGATIVE	#N/A	#N/A	#N/A	#N/A
723	JAYARAM	Male	42	WARD BOY ( MRD)	Unknown	UNKNOWN	Hospital support staff	YES	COVISHEILD	NA	None	No	NA	Yes	NILL	5.3	60	23.4	NO	YES	NONE	7-8hrs	NO	NO	NONVEGETARIAN	URBAN	NUCLAR	87.26	POSITIVE	5.26	POSITIVE	#N/A	#N/A	#N/A	#N/A
724	GOWRI	Female	49	PHARMACIST	O GROUP	Rh+VE	Hospital support staff	YES	COVISHEILD	NA	None	No	NA	No	NILL	5.1	59	24.6	NO	NO	DAILY	7-8hrs	YES	NO	NONVEGETARIAN	URBAN	NUCLAR	43.12	NEGATIVE	0.93	NEGATIVE	37.7985	POSITIVE	9.76014	POSITIVE
725	KULLAYAPPA NAIK	Male	31	PHARMACIST	O GROUP	Rh+VE	Hospital support staff	YES	COVISHEILD	NA	Myalgia	No	NA	No	NILL	5.7	85	29.3	NO	YES	WEEKLY	7-8hrs	NO	NO	NONVEGETARIAN	URBAN	NUCLAR	98.86	POSITIVE	6.62	POSITIVE	#N/A	#N/A	#N/A	#N/A
726	SRAVAN KUMAR	Male	28	PA ( PURCHASE)	A GROUP	Rh+VE	OTHERS	YES	COVISHEILD	28	Headache,Fever,Myalgia	No	NA	No	NILL	5.6	62	22.1	NO	YES	NONE	7-8hrs	NO	NO	NONVEGETARIAN	URBAN	SINGLE	99.23	POSITIVE	5.02	POSITIVE	89.25	POSITIVE	41.23	POSITIVE
727	PREM KUMAR	Male	27	PHARMACIST	B GROUP	Rh+VE	Hospital support staff	YES	COVISHEILD	90	Myalgia	No	NA	No	NILL	5.8	78	26.1	NO	NO	NONE	7-8hrs	NO	NO	NONVEGETARIAN	RURAL	NUCLAR	98.46	POSITIVE	4.18	POSITIVE	96.3682	POSITIVE	46.352	POSITIVE
728	MADHAVUDU	Male	38	SECURITY GAURD	O GROUP	Rh+VE	Hospital support staff	YES	COVISHEILD	31	None	No	NA	Yes	NILL	6.4	84	22.5	NO	NO	NONE	< 7hrs	NO	NO	NONVEGETARIAN	URBAN	NUCLAR	94.91	POSITIVE	3.83	POSITIVE	#N/A	#N/A	#N/A	#N/A
729	VENKATAPADMA KUMAR	Male	55	ASSISTANT ENGINEER	B GROUP	Rh+VE	OTHERS	YES	COVISHEILD	22	Fever	No	NA	No	NILL	5.4	61	23.1	NO	NO	WEEKLY	< 7hrs	NO	YES	VEGETARIAN	URBAN	NUCLAR	53.4	POSITIVE	1.28	NEGATIVE	#N/A	#N/A	#N/A	#N/A
730	JAKEER AHAMMAD	Male	27	LAB TECHNICIAN	A GROUP	Rh+VE	Laboratory Technician	YES	COVISHEILD	42	None	YES	Moderate	Yes	NILL	5.2	72	29	NO	YES	WEEKLY	< 7hrs	NO	NO	NONVEGETARIAN	URBAN	NUCLAR	99.2	POSITIVE	5.28	POSITIVE	80.2363	POSITIVE	21.8353	POSITIVE
731	SIOVA SANKAR	Male	47	SECURITY GAURD	AB GROUP	Rh+VE	OTHERS	YES	COVISHEILD	NA	None	YES	Moderate	Yes	NILL	5.6	79	28.1	NO	NO	DAILY	< 7hrs	NO	NO	NONVEGETARIAN	URBAN	NUCLAR	99.69	POSITIVE	16.35	POSITIVE	#N/A	#N/A	#N/A	#N/A
732	JAYAVARDHAN	Male	32	DIALYSIS TECHNICIAN	A GROUP	Rh-VE	Laboratory Technician	YES	COVISHEILD	58	None	No	NA	Yes	NILL	5.6	74	26.3	NO	YES	DAILY	7-8hrs	NO	NO	NONVEGETARIAN	URBAN	NUCLAR	99.4	POSITIVE	8.06	POSITIVE	#N/A	#N/A	#N/A	#N/A
733	CHANDRA SEKHAR	Male	30	PHARMACIST	B GROUP	Rh+VE	Hospital support staff	YES	COVISHEILD	28	None	No	NA	No	NILL	5	65	28	NO	NO	WEEKLY	7-8hrs	NO	NO	NONVEGETARIAN	RURAL	NUCLAR	63.01	POSITIVE	0.7	NEGATIVE	98.3831	POSITIVE	36.7578	POSITIVE
734	VENKATESH	Male	36	WARD BOY ( DIETITIAN)	O GROUP	Rh+VE	OTHERS	YES	COVISHEILD	NA	Myalgia,Headache,Fever	No	NA	Yes	NILL	6	87	26	NO	YES	NONE	< 7hrs	NO	NO	NONVEGETARIAN	URBAN	NUCLAR	99.59	POSITIVE	16.33	POSITIVE	#N/A	#N/A	#N/A	#N/A
735	SREENIVASULU	Male	41	WARD BOY ( DIETITIAN)	O GROUP	Rh-VE	OTHERS	YES	COVISHEILD	NA	Fever,Headache	No	NA	Yes	NILL	5.6	70	24.9	NO	NO	NONE	7-8hrs	NO	NO	NONVEGETARIAN	URBAN	NUCLAR	99.66	POSITIVE	10.49	POSITIVE	92.23	POSITIVE	34.23	POSITIVE
736	KEERTHI	Female	28	PHARMACIST	B GROUP	Rh+VE	Hospital support staff	YES	COVISHEILD	84	Myalgia	YES	Mild	Yes	NILL	5	63	27.1	NO	NO	NONE	< 7hrs	NO	NO	NONVEGETARIAN	URBAN	NUCLAR	99.52	POSITIVE	8.66	POSITIVE	#N/A	#N/A	#N/A	#N/A
737	PAVAN KUMARI	Female	33	PHARMACIST	B GROUP	Rh+VE	Hospital support staff	YES	COVISHEILD	44	Headache	No	NA	No	NILL	4.9	58	27.7	NO	NO	NONE	7-8hrs	NO	NO	NONVEGETARIAN	URBAN	NUCLAR	65.39	POSITIVE	1.19	NEGATIVE	89.3532	POSITIVE	38.6348	POSITIVE
738	GOWRI	Female	30	PHARMACIST	O GROUP	Rh+VE	Hospital support staff	YES	COVISHEILD	30	Fever,Headache,Myalgia	No	NA	No	NILL	5.4	75	28.4	NO	NO	WEEKLY	< 7hrs	NO	NO	NONVEGETARIAN	URBAN	NUCLAR	97.53	POSITIVE	5.02	POSITIVE	#N/A	#N/A	#N/A	#N/A
739	POOJASREE	Female	22	DOCTOR	B GROUP	Rh+VE	Doctor/Clinician	YES	COVISHEILD	43	Myalgia,Fever	No	NA	Yes	NILL	5.2	66	26.6	NO	NO	NONE	< 7hrs	YES	NO	VEGETARIAN	URBAN	NUCLAR	88.2	POSITIVE	2.25	POSITIVE	#N/A	#N/A	#N/A	#N/A
740	MONIKA	Female	22	DOCTOR	B GROUP	Rh+VE	Doctor/Clinician	YES	COVISHEILD	34	Headache,Fever,Myalgia,Irritability	No	NA	Yes	NILL	5.2	60	24.2	NO	NO	NONE	< 7hrs	NO	NO	NONVEGETARIAN	URBAN	NUCLAR	47.28	NEGATIVE	1.55	NEGATIVE	#N/A	#N/A	#N/A	#N/A
741	GIRIJA	Female	47	WARD BOY	Unknown	UNKNOWN	OTHERS	YES	COVISHEILD	94	None	No	NA	No	NILL	5.6	52	18.5	NO	NO	NONE	7-8hrs	NO	NO	NONVEGETARIAN	URBAN	NUCLAR	99.48	POSITIVE	11.71	POSITIVE	#N/A	#N/A	#N/A	#N/A
742	GAYATHRI	Female	21	DOCTOR	A GROUP	Rh+VE	Doctor/Clinician	YES	COVISHEILD	42	Myalgia,Headache,Fever,Irritability	No	NA	Yes	NILL	5.1	50	20.8	NO	NO	WEEKLY	7-8hrs	NO	NO	NONVEGETARIAN	URBAN	NUCLAR	94.11	POSITIVE	2.53	POSITIVE	#N/A	#N/A	#N/A	#N/A
743	INDRANI	Female	43	WARD BOY	Unknown	UNKNOWN	OTHERS	YES	COVISHEILD	NA	Fever,Headache,Myalgia	No	NA	No	NILL	5.2	65	26.2	NO	NO	NONE	7-8hrs	NO	NO	NONVEGETARIAN	URBAN	NUCLAR	80.9	POSITIVE	1.22	NEGATIVE	#N/A	#N/A	#N/A	#N/A
744	ANUPAMA	Female	26	DOCTOR	B GROUP	Rh+VE	Doctor/Clinician	YES	COVISHEILD	NA	None	No	NA	Yes	NILL	5.6	70	24.9	NO	NO	WEEKLY	< 7hrs	NO	NO	NONVEGETARIAN	URBAN	NUCLAR	99.65	POSITIVE	12.33	POSITIVE	89.23	POSITIVE	34.23	POSITIVE
745	LALITHA KUMARI	Female	57	ANM	O GROUP	Rh+VE	Nurse	YES	COVISHEILD	31	None	No	NA	Yes	NILL	5.2	57	23	NO	NO	DAILY	< 7hrs	NO	NO	NONVEGETARIAN	URBAN	NUCLAR	99.56	POSITIVE	9.78	POSITIVE	93.23	POSITIVE	38.23	POSITIVE
746	MENAKA	Female	40	STAFF NURSE	AB GROUP	Rh+VE	Nurse	YES	Covaxin	NA	None	No	NA	Yes	NILL	5.5	60	22	NO	NO	NONE	< 7hrs	NO	NO	NONVEGETARIAN	URBAN	NUCLAR	98.78	POSITIVE	13.81	POSITIVE	#N/A	#N/A	#N/A	#N/A
747	LAKSHMI DEVI	Female	29	STAFF NURSE	O GROUP	Rh+VE	Nurse	YES	Covaxin	NA	Myalgia,Headache,Fever	YES	Severe	Yes	NILL	5	50	21.5	NO	NO	NONE	< 7hrs	NO	NO	NONVEGETARIAN	URBAN	SINGLE	95.25	POSITIVE	4.37	POSITIVE	99.48	POSITIVE	40.89	POSITIVE
748	KALPANA	Female	34	STAFF NURSE	O GROUP	Rh+VE	Nurse	YES	Covaxin	NA	Myalgia	YES	Asymptomatic	Yes	NILL	5.5	87	31.9	NO	NO	DAILY	< 7hrs	NO	YES	NONVEGETARIAN	URBAN	NUCLAR	99.64	POSITIVE	16.29	POSITIVE	#N/A	#N/A	#N/A	#N/A
749	RANJITHA	Female	28	STAFF NURSE	B GROUP	Rh+VE	Nurse	YES	COVISHEILD	NA	Myalgia	YES	Moderate	Yes	NILL	5.6	64	22.8	NO	NO	NONE	< 7hrs	YES	NO	NONVEGETARIAN	URBAN	NUCLAR	99.48	POSITIVE	13.08	POSITIVE	#N/A	#N/A	#N/A	#N/A
750	CHANDURMAI	Female	30	STAFF NURSE	AB GROUP	Rh+VE	Nurse	YES	Covaxin	NA	Myalgia	No	NA	Yes	NILL	5.1	58	24.2	NO	NO	DAILY	7-8hrs	NO	NO	NONVEGETARIAN	URBAN	NUCLAR	31.05	NEGATIVE	1.43	NEGATIVE	#N/A	#N/A	#N/A	#N/A
751	INDU	Female	25	STAFF NURSE	B GROUP	Rh+VE	Nurse	YES	Covaxin	NA	None	No	NA	Yes	NILL	5.3	48	18.7	NO	NO	NONE	7-8hrs	NO	NO	NONVEGETARIAN	URBAN	NUCLAR	5.06	NEGATIVE	0.95	NEGATIVE	#N/A	#N/A	#N/A	#N/A
752	REDDI VENI	Female	34	STAFF NURSE	A GROUP	Rh+VE	Nurse	YES	COVISHEILD	NA	Headache,Fever,Myalgia	YES	Severe	Yes	NILL	5	55	23.7	NO	NO	NONE	7-8hrs	YES	YES	NONVEGETARIAN	URBAN	NUCLAR	99.32	POSITIVE	9.55	POSITIVE	#N/A	#N/A	#N/A	#N/A
753	RAGHU	Male	24	WARD BOY	Unknown	UNKNOWN	OTHERS	YES	Covaxin	60	None	No	NA	No	NILL	5.1	43	17.9	NO	YES	NONE	7-8hrs	YES	NO	NONVEGETARIAN	URBAN	NUCLAR	30.83	NEGATIVE	1.44	NEGATIVE	#N/A	#N/A	#N/A	#N/A
754	RAVEENDRA	Male	48	SECURITY GAURD	Unknown	UNKNOWN	OTHERS	YES	Covaxin	NA	Fever,Headache	YES	Moderate	No	NILL	5.6	87	31	NO	NO	WEEKLY	7-8hrs	NO	NO	NONVEGETARIAN	URBAN	NUCLAR	91.78	POSITIVE	15.99	POSITIVE	#N/A	#N/A	#N/A	#N/A
755	SHIRIDI MAI	Female	23	PHYSIO STUDENT	A GROUP	Rh-VE	OTHERS	YES	COVISHEILD	46	Myalgia,Headache,Fever,Irritability	No	NA	Yes	NILL	5.4	72	27.2	NO	NO	DAILY	7-8hrs	NO	NO	VEGETARIAN	RURAL	NUCLAR	73.39	POSITIVE	2.9	POSITIVE	#N/A	#N/A	#N/A	#N/A
756	REDDANNA	Male	52	SECURITY GAURD	B GROUP	Rh+VE	OTHERS	YES	COVISHEILD	NA	None	No	NA	Yes	NILL	5.6	84	29.9	YES	YES	DAILY	7-8hrs	NO	NO	NONVEGETARIAN	URBAN	NUCLAR	39.89	NEGATIVE	1.43	NEGATIVE	#N/A	#N/A	#N/A	#N/A
757	MUNEENDRA	Male	33	PA ( MRD)	A GROUP	Rh+VE	OTHERS	YES	COVISHEILD	32	Fever,Headache	YES	Mild	No	NILL	5.3	62	24.2	NO	NO	DAILY	7-8hrs	NO	NO	NONVEGETARIAN	URBAN	NUCLAR	99.7	POSITIVE	12.73	POSITIVE	#N/A	#N/A	#N/A	#N/A
758	PRASAD BABU	Male	33	MRD TECHNICIAN	A GROUP	Rh+VE	OTHERS	YES	COVISHEILD	60	Headache,Fever	No	NA	Yes	NILL	5.7	74	25.6	NO	NO	WEEKLY	7-8hrs	NO	NO	NONVEGETARIAN	URBAN	NUCLAR	98.62	POSITIVE	10.22	POSITIVE	#N/A	#N/A	#N/A	#N/A
759	GUNASEKHAR	Male	39	LAB TECHNICIAN	B GROUP	Rh+VE	Laboratory Technician	YES	COVISHEILD	90	None	YES	Asymptomatic	Yes	NILL	5.7	82	28.3	NO	NO	DAILY	7-8hrs	NO	NO	VEGETARIAN	RURAL	NUCLAR	99.61	POSITIVE	12.85	POSITIVE	#N/A	#N/A	#N/A	#N/A
760	VARALAKSHMI	Female	52	HEAD NURSE	A GROUP	Rh+VE	Nurse	YES	COVISHEILD	NA	None	YES	Mild	Yes	NILL	5.1	80	33.3	NO	NO	WEEKLY	< 7hrs	NO	NO	NONVEGETARIAN	URBAN	NUCLAR	99.61	POSITIVE	18.78	POSITIVE	#N/A	#N/A	#N/A	#N/A
761	RAMESWARI	Female	35	STAFF NURSE	B GROUP	Rh+VE	Nurse	YES	COVISHEILD	45	Fever,Headache	No	NA	Yes	NILL	5	78	33.6	NO	NO	WEEKLY	7-8hrs	YES	NO	NONVEGETARIAN	URBAN	NUCLAR	94.44	POSITIVE	7.53	POSITIVE	#N/A	#N/A	#N/A	#N/A
762	SRIKANTH	Male	37	CLINICAL PHYSIOTHERAPIST	O GROUP	Rh+VE	Doctor/Clinician	YES	COVISHEILD	28	None	No	NA	Yes	NILL	5.6	68	24.2	NO	NO	NONE	< 7hrs	NO	NO	NONVEGETARIAN	URBAN	NUCLAR	98.2	POSITIVE	15.22	POSITIVE	#N/A	#N/A	#N/A	#N/A
763	PADHMAVATHAMMA	Female	33	WORKER	Unknown	UNKNOWN	Hospital support staff	YES	COVISHEILD	40	Fever	No	NA	Yes	NILL	5.4	70	26.5	NO	NO	DAILY	< 7hrs	NO	NO	NONVEGETARIAN	URBAN	NUCLAR	99.61	POSITIVE	13.31	POSITIVE	#N/A	#N/A	#N/A	#N/A
764	SANDHYA RANI	Female	48	SENIOR TAILOR	O GROUP	Rh+VE	Hospital support staff	YES	Covaxin	28	None	No	NA	No	NILL	5	80	34.4	NO	NO	NONE	< 7hrs	NO	NO	VEGETARIAN	URBAN	NUCLAR	95.39	POSITIVE	5.6	POSITIVE	#N/A	#N/A	#N/A	#N/A
765	POORNIMA	Female	26	PHARMACIST	O GROUP	Rh+VE	Doctor/Clinician	YES	COVISHEILD	84	Headache,Myalgia	YES	Mild	Yes	NILL	5.5	65	23.8	NO	NO	NONE	< 7hrs	NO	NO	NONVEGETARIAN	URBAN	NUCLAR	44.7	NEGATIVE	1.37	NEGATIVE	99.32	POSITIVE	39.78	POSITIVE
766	RAJYA LAKSHMI	Female	49	STAFF NURSE	O GROUP	Rh+VE	Nurse	YES	COVISHEILD	28	Headache,Myalgia	No	NA	Yes	NILL	5.6	86	30.6	NO	NO	DAILY	< 7hrs	NO	NO	NONVEGETARIAN	URBAN	NUCLAR	98.84	POSITIVE	9.16	POSITIVE	#N/A	#N/A	#N/A	#N/A
767	RAJITHA	Female	24	PHARMACIST	B GROUP	Rh+VE	Doctor/Clinician	YES	COVISHEILD	84	Myalgia,Headache,Fever	No	NA	Yes	NILL	5.4	48	18.2	NO	NO	DAILY	< 7hrs	NO	NO	NONVEGETARIAN	URBAN	SINGLE	54.53	POSITIVE	1.41	NEGATIVE	#N/A	#N/A	#N/A	#N/A
768	VASANTHAMMA	Female	48	WARD BOY	A GROUP	Rh+VE	Hospital support staff	YES	COVISHEILD	28	Irritability,Myalgia	No	NA	Yes	NILL	5	50	21.5	NO	NO	DAILY	< 7hrs	NO	NO	NONVEGETARIAN	URBAN	NUCLAR	43.55	NEGATIVE	1.46	NEGATIVE	#N/A	#N/A	#N/A	#N/A
769	NAGENDRA BABU	Male	56	SUPERIDENT	O GROUP	Rh-VE	Svims Administrative Staff	YES	COVISHEILD	82	None	No	NA	No	NILL	5.8	76	25.5	NO	NO	NONE	< 7hrs	NO	NO	NONVEGETARIAN	URBAN	NUCLAR	99.38	POSITIVE	10.36	POSITIVE	#N/A	#N/A	#N/A	#N/A
770	JANARDHANA	Male	44	WARD BOY	AB GROUP	Rh+VE	Hospital support staff	YES	COVISHEILD	35	Headache,Myalgia	No	NA	Yes	NILL	5.4	68	25.7	NO	NO	DAILY	< 7hrs	NO	NO	NONVEGETARIAN	URBAN	NUCLAR	71.44	POSITIVE	2.72	POSITIVE	#N/A	#N/A	#N/A	#N/A
771	HEPSIBA SUZANNE	Female	42	ANEASTHISIA TECHNICIAN	A GROUP	Rh+VE	Laboratory Technician	YES	COVISHEILD	30	Myalgia,Headache	YES	Mild	Yes	NILL	5.4	70	26.5	NO	NO	DAILY	< 7hrs	NO	NO	NONVEGETARIAN	URBAN	NUCLAR	99.32	POSITIVE	15.41	POSITIVE	#N/A	#N/A	#N/A	#N/A
772	ROSHINI	Female	21	ANEASTHISIA TECHNICIAN	A GROUP	Rh+VE	Laboratory Technician	YES	COVISHEILD	84	Fever,Myalgia	No	NA	Yes	NILL	4.9	39	18.6	NO	NO	NONE	< 7hrs	NO	NO	NONVEGETARIAN	URBAN	NUCLAR	99.51	POSITIVE	9.55	POSITIVE	#N/A	#N/A	#N/A	#N/A
773	SAI BHARGAVI	Female	25	MPT STUDENT	O GROUP	Rh+VE	OTHERS	YES	COVISHEILD	84	Fever	No	NA	No	NILL	5.5	70	25.7	NO	NO	NONE	< 7hrs	NO	NO	NONVEGETARIAN	URBAN	SINGLE	59.59	POSITIVE	4.1	POSITIVE	#N/A	#N/A	#N/A	#N/A
774	LIKITHA	Female	23	MPT STUDENT	B GROUP	Rh+VE	OTHERS	YES	COVISHEILD	84	Fever,Irritability	No	NA	No	NILL	5	50	21.5	NO	NO	NONE	< 7hrs	NO	NO	NONVEGETARIAN	URBAN	SINGLE	99.54	POSITIVE	12.15	POSITIVE	#N/A	#N/A	#N/A	#N/A
775	SUDHA RANI	Female	55	ANM	B GROUP	Rh+VE	Nurse	YES	COVISHEILD	28	Fever	YES	Mild	Yes	NILL	5.1	62	25.8	NO	NO	NONE	< 7hrs	NO	NO	VEGETARIAN	URBAN	NUCLAR	88.78	POSITIVE	4.91	POSITIVE	96.89	POSITIVE	42.23	POSITIVE
776	CHAKRADHAR	Male	37	RESEARCH ASSOCIATE	O GROUP	Rh+VE	Researchers	YES	COVISHEILD	28	Headache,Myalgia	No	NA	No	NILL	5.5	70	25.7	NO	NO	DAILY	< 7hrs	NO	NO	NONVEGETARIAN	URBAN	NUCLAR	76.17	POSITIVE	2.65	POSITIVE	#N/A	#N/A	#N/A	#N/A
777	SUBBA LAKSHMI	Female	51	STAFF NURSE	B GROUP	Rh+VE	Nurse	No	not vaccinated	na	None	YES	Mild	Yes	NILL	5	72	31	NO	NO	NONE	< 7hrs	NO	NO	NONVEGETARIAN	URBAN	NUCLAR	99.2	POSITIVE	15.33	POSITIVE	#N/A	#N/A	#N/A	#N/A
778	CHANDRA BABU	Male	39	PHARMACIST	O GROUP	Rh+VE	Doctor/Clinician	YES	COVISHEILD	34	Headache,Myalgia	YES	Asymptomatic	Yes	NILL	5.1	52	21.7	NO	YES	NONE	< 7hrs	NO	NO	NONVEGETARIAN	URBAN	NUCLAR	98.87	POSITIVE	9.72	POSITIVE	#N/A	#N/A	#N/A	#N/A
779	RAJINI	Female	44	MRD TECHNICIAN	O GROUP	Rh+VE	Svims Administrative Staff	YES	Covaxin	40	None	No	NA	No	NILL	5.3	60	23.4	NO	NO	NONE	< 7hrs	NO	NO	NONVEGETARIAN	URBAN	NUCLAR	29.39	NEGATIVE	0.74	NEGATIVE	#N/A	#N/A	#N/A	#N/A
780	MADHURI	Female	30	PA	B GROUP	Rh+VE	Svims Administrative Staff	YES	COVISHEILD	84	Headache,Myalgia	YES	Mild	No	NILL	5.4	94	35.6	NO	NO	NONE	< 7hrs	NO	NO	NONVEGETARIAN	URBAN	NUCLAR	99.43	POSITIVE	10.87	POSITIVE	#N/A	#N/A	#N/A	#N/A
781	JAYASREE	Female	28	MSW	Unknown	UNKNOWN	Hospital support staff	YES	Covaxin	48	None	No	NA	No	NILL	5	65	28	NO	NO	DAILY	< 7hrs	NO	NO	VEGETARIAN	URBAN	NUCLAR	58.16	POSITIVE	8.42	POSITIVE	#N/A	#N/A	#N/A	#N/A
782	UMA MAHESWARI	Female	36	PA	O GROUP	Rh+VE	Svims Administrative Staff	YES	COVISHEILD	84	Headache,Myalgia	YES	Mild	No	NILL	5	67	28.8	NO	NO	NONE	< 7hrs	NO	YES	NONVEGETARIAN	URBAN	NUCLAR	93.51	POSITIVE	6.76	POSITIVE	96.56	POSITIVE	39.65	POSITIVE
783	KIRAN KUMAR	Male	35	SECURITY GAURD	A GROUP	Rh-VE	Hospital support staff	YES	COVISHEILD	40	Fever,Myalgia	No	NA	No	NILL	5.8	82	27.5	NO	NO	NONE	< 7hrs	NO	NO	NONVEGETARIAN	URBAN	NUCLAR	99.05	POSITIVE	15.25	POSITIVE	#N/A	#N/A	#N/A	#N/A
784	SUKRABABU	Male	49	WARD BOY ( AROGYASREE)	O GROUP	Rh+VE	Hospital support staff	YES	Covaxin	45	Myalgia	No	NA	Yes	NILL	5.5	65	23.8	NO	YES	NONE	< 7hrs	NO	NO	NONVEGETARIAN	URBAN	NUCLAR	99.46	POSITIVE	7.52	POSITIVE	#N/A	#N/A	#N/A	#N/A
785	Gundamreddy	Male	50	Staff	B GROUP	Rh+VE	Svims Administrative Staff	YES	COVISHEILD	33	None	No	NA	No	NILL	5.8	73	24.5	NO	NO	DAILY	> 8hrs	NO	NO	NONVEGETARIAN	URBAN	NUCLAR	38.17	NEGATIVE	0.88	NEGATIVE	#N/A	#N/A	#N/A	#N/A
786	Gundamreddy	Female	49	Staff	O GROUP	Rh+VE	Svims Administrative Staff	YES	COVISHEILD	32	None	YES	Asymptomatic	No	NILL	5.6	70	24.9	NO	NO	NONE	7-8hrs	NO	NO	NONVEGETARIAN	URBAN	NUCLAR	99.24	POSITIVE	14.12	POSITIVE	#N/A	#N/A	#N/A	#N/A
787	BHABITHA	Female	28	DEO ( AROGYASREE)	AB GROUP	Rh+VE	Hospital support staff	YES	COVISHEILD	NA	None	No	NA	No	NILL	5.1	52	21.7	NO	NO	NONE	7-8hrs	NO	NO	VEGETARIAN	URBAN	NUCLAR	98.43	POSITIVE	11.18	POSITIVE	#N/A	#N/A	#N/A	#N/A
788	JAGADEESH	Male	31	DEO ( AROGYASREE)	B GROUP	Rh+VE	Hospital support staff	YES	COVISHEILD	28	Myalgia	YES	Moderate	No	NILL	5.4	61	23.1	NO	NO	NONE	> 8hrs	NO	NO	NONVEGETARIAN	URBAN	NUCLAR	99.15	POSITIVE	7.69	POSITIVE	#N/A	#N/A	#N/A	#N/A
789	SESHADRI	Male	52	OT ASSISTANT	B GROUP	Rh+VE	Hospital support staff	YES	COVISHEILD	35	Fever,Myalgia,Headache	YES	Mild	Yes	NILL	5.4	72	27.2	YES	NO	DAILY	< 7hrs	NO	NO	NONVEGETARIAN	URBAN	NUCLAR	99.44	POSITIVE	12.44	POSITIVE	98.097	POSITIVE	34.5501	POSITIVE
790	BHASKAR	Male	54	OT ASSISTANT	B GROUP	Rh+VE	Hospital support staff	YES	COVISHEILD	40	None	No	NA	Yes	NILL	5.3	75	29.3	NO	NO	DAILY	< 7hrs	NO	NO	NONVEGETARIAN	URBAN	NUCLAR	97.18	POSITIVE	5.8	POSITIVE	79.403	POSITIVE	12.6456	POSITIVE
791	LOKANADH REDDY	Male	55	OT ASSISTANT	O GROUP	Rh+VE	Hospital support staff	YES	COVISHEILD	30	None	No	NA	Yes	NILL	5.4	80	30.3	NO	NO	DAILY	< 7hrs	NO	NO	NONVEGETARIAN	URBAN	NUCLAR	26.81	NEGATIVE	0.68	NEGATIVE	78.5448	POSITIVE	47.7327	POSITIVE
792	SHOBHA RANI	Female	45	STAFF NURSE	B GROUP	Rh+VE	Nurse	YES	COVISHEILD	84	Fever,Irritability,Myalgia	No	NA	Yes	NILL	5.2	90	36.3	NO	NO	NONE	< 7hrs	YES	YES	NONVEGETARIAN	URBAN	NUCLAR	99.5	POSITIVE	11.92	POSITIVE	#N/A	#N/A	#N/A	#N/A
793	MUNI KRISHNADU	Male	68	LIBRARY ASSISTANT	B GROUP	Rh+VE	Hospital support staff	YES	COVISHEILD	35	None	YES	Asymptomatic	No	NILL	5.2	65	26.2	NO	NO	DAILY	< 7hrs	NO	NO	VEGETARIAN	URBAN	NUCLAR	99.22	POSITIVE	10.58	POSITIVE	93.1592	POSITIVE	17.8377	POSITIVE
794	RAMA CHANDRAIAH	Male	49	ATTENDER	Unknown	UNKNOWN	Hospital support staff	YES	COVISHEILD	30	Myalgia	No	NA	No	NILL	5.6	73	26	NO	NO	DAILY	< 7hrs	NO	NO	NONVEGETARIAN	URBAN	NUCLAR	99.39	POSITIVE	11.08	POSITIVE	#N/A	#N/A	#N/A	#N/A
795	KUMARI	Female	33	STAFF NURSE	B GROUP	Rh+VE	Nurse	YES	COVISHEILD	84	Myalgia	No	NA	Yes	NILL	5.1	62	25.8	NO	NO	NONE	< 7hrs	NO	NO	NONVEGETARIAN	URBAN	NUCLAR	99.61	POSITIVE	13.41	POSITIVE	#N/A	#N/A	#N/A	#N/A
796	SARADA	Female	51	LIBRARY ASSISTANT	Unknown	UNKNOWN	Hospital support staff	YES	COVISHEILD	32	Fever,Myalgia	YES	Mild	No	NILL	5.3	68	26.6	NO	NO	DAILY	< 7hrs	NO	NO	NONVEGETARIAN	URBAN	NUCLAR	99.2	POSITIVE	10.14	POSITIVE	98.4722	POSITIVE	37.6659	POSITIVE
797	THULASINADH	Male	36	PA	O GROUP	Rh+VE	Svims Administrative Staff	YES	COVISHEILD	31	Myalgia	No	NA	No	NILL	5.4	77	29.1	NO	NO	NONE	< 7hrs	NO	NO	NONVEGETARIAN	URBAN	NUCLAR	96.41	POSITIVE	4.98	POSITIVE	#N/A	#N/A	#N/A	#N/A
798	JAYA CHANDRA	Male	39	PA	B GROUP	Rh+VE	Svims Administrative Staff	YES	COVISHEILD	28	Myalgia,Headache	YES	Mild	No	NILL	5.4	73	27.6	NO	NO	NONE	< 7hrs	NO	NO	NONVEGETARIAN	URBAN	NUCLAR	99.38	POSITIVE	10.79	POSITIVE	#N/A	#N/A	#N/A	#N/A
799	RAVI	Male	58	NEUCLEAR MEDICINE TECHNOLOGYST	O GROUP	Rh+VE	Doctor/Clinician	YES	COVISHEILD	28	Fever,Myalgia	YES	Severe	Yes	NILL	5.8	105	35.2	NO	NO	NONE	< 7hrs	NO	NO	VEGETARIAN	URBAN	NUCLAR	99.36	POSITIVE	16.9	POSITIVE	#N/A	#N/A	#N/A	#N/A
800	GIRI	Male	40	PA	A GROUP	Rh+VE	Svims Administrative Staff	YES	COVISHEILD	61	Fever,Myalgia	YES	Mild	No	NILL	5.4	77	29.1	NO	YES	NONE	< 7hrs	NO	NO	NONVEGETARIAN	URBAN	NUCLAR	96.31	POSITIVE	9.46	POSITIVE	#N/A	#N/A	#N/A	#N/A
801	VENKAT	Male	36	ASSOCIATE PROFESSOR	O GROUP	Rh+VE	Doctor/Clinician	YES	COVISHEILD	45	None	YES	Mild	Yes	NILL	5.11	80	24.6	NO	NO	DAILY	< 7hrs	NO	NO	VEGETARIAN	URBAN	NUCLAR	98.69	POSITIVE	6.82	POSITIVE	#N/A	#N/A	#N/A	#N/A
802	VENKATESWARA PRASAD	Male	49	MEDICO SOCIAL WORKER	O GROUP	Rh+VE	Svims Administrative Staff	YES	COVISHEILD	48	Myalgia	YES	Mild	Yes	NILL	5.7	70	24.2	NO	NO	NONE	< 7hrs	NO	NO	NONVEGETARIAN	URBAN	NUCLAR	98.79	POSITIVE	10.58	POSITIVE	#N/A	#N/A	#N/A	#N/A
803	NOORJAHAN	Female	46	WORKER	Unknown	UNKNOWN	Multipurpose worker	YES	COVISHEILD	84	None	No	NA	Yes	NILL	4.8	35	17.3	NO	NO	DAILY	< 7hrs	NO	NO	NONVEGETARIAN	URBAN	NUCLAR	99.7	POSITIVE	15.16	POSITIVE	#N/A	#N/A	#N/A	#N/A
804	GOVINDHAMMA	Female	58	WORKER	O GROUP	Rh+VE	Hospital support staff	YES	COVISHEILD	84	None	YES	Asymptomatic	Yes	NILL	4.9	49	23.4	NO	NO	DAILY	< 7hrs	NO	NO	NONVEGETARIAN	URBAN	NUCLAR	99.61	POSITIVE	16.44	POSITIVE	#N/A	#N/A	#N/A	#N/A
805	SASI KUMAR	Male	28	PA	B GROUP	Rh+VE	Svims Administrative Staff	YES	COVISHEILD	48	None	YES	Asymptomatic	No	NILL	5.6	93	33.1	NO	NO	NONE	< 7hrs	NO	NO	NONVEGETARIAN	URBAN	NUCLAR	98.99	POSITIVE	7.66	POSITIVE	#N/A	#N/A	#N/A	#N/A
806	RANGESH	Male	29	PA	AB GROUP	Rh+VE	Svims Administrative Staff	YES	COVISHEILD	48	None	No	NA	No	NILL	5.5	70	25.7	NO	NO	NONE	< 7hrs	NO	NO	NONVEGETARIAN	URBAN	NUCLAR	53.99	POSITIVE	1.023	NEGATIVE	#N/A	#N/A	#N/A	#N/A
807	SHARON	Female	27	RESEARCH SCHOLAR	B GROUP	Rh+VE	OTHERS	YES	COVISHEILD	84	None	No	NA	No	NILL	5.4	80	30.3	NO	NO	DAILY	< 7hrs	NO	YES	NONVEGETARIAN	URBAN	NUCLAR	99.03	POSITIVE	7.93	POSITIVE	#N/A	#N/A	#N/A	#N/A
808	SIVA RANJANI	Female	26	RESEARCH SCHOLAR	AB GROUP	Rh+VE	Researchers	YES	COVISHEILD	84	None	No	NA	No	NILL	5.4	68	25.7	NO	NO	DAILY	< 7hrs	NO	YES	NONVEGETARIAN	URBAN	SINGLE	76.21	POSITIVE	1.31	NEGATIVE	#N/A	#N/A	#N/A	#N/A
809	VARALU	Female	40	WORKER	O GROUP	Rh+VE	Hospital support staff	YES	COVISHEILD	30	Fever,Myalgia	No	NA	No	NILL	4.7	60	30.7	NO	NO	DAILY	< 7hrs	NO	NO	NONVEGETARIAN	URBAN	NUCLAR	98.6	POSITIVE	9.65	POSITIVE	#N/A	#N/A	#N/A	#N/A
810	SANTHAMMA	Female	42	WORKER	Unknown	UNKNOWN	Hospital support staff	YES	Covaxin	60	None	YES	Mild	Yes	NILL	4.8	65	32.1	NO	NO	DAILY	< 7hrs	NO	NO	NONVEGETARIAN	URBAN	NUCLAR	98.85	POSITIVE	20.26	POSITIVE	#N/A	#N/A	#N/A	#N/A
811	JIGEESHA	Female	21	NURSING SUPERIDENT	B GROUP	Rh+VE	Nurse	YES	COVISHEILD	28	None	No	NA	No	NILL	5.2	80	32.3	NO	NO	WEEKLY	7-8hrs	YES	NO	NONVEGETARIAN	URBAN	NUCLAR	52.34	POSITIVE	0.88	NEGATIVE	#N/A	#N/A	#N/A	#N/A
812	MADHAVA RAO	Male	38	SECURITY SUPERVISOR	O GROUP	Rh+VE	Hospital support staff	YES	Covaxin	30	Fever,Myalgia	No	NA	No	NILL	5.6	65	23.1	NO	NO	DAILY	< 7hrs	NO	YES	NONVEGETARIAN	URBAN	NUCLAR	99.28	POSITIVE	8.4	POSITIVE	#N/A	#N/A	#N/A	#N/A
813	SREE RAMULU	Male	67	AUDITOR	B GROUP	Rh+VE	Svims Administrative Staff	YES	COVISHEILD	28	Myalgia,Irritability	No	NA	No	NILL	5.4	67	25.4	NO	YES	DAILY	< 7hrs	NO	NO	NONVEGETARIAN	URBAN	NUCLAR	99.57	POSITIVE	12.76	POSITIVE	96.791	POSITIVE	29.4594	POSITIVE
814	DARAGAIAH	Male	55	ASSISTANT DIRECTOR	B GROUP	Rh+VE	Svims Administrative Staff	YES	COVISHEILD	30	None	No	NA	No	NILL	5.4	74	28	NO	NO	DAILY	< 7hrs	NO	NO	NONVEGETARIAN	URBAN	NUCLAR	64.11	POSITIVE	1.32	NEGATIVE	#N/A	#N/A	#N/A	#N/A
815	RAJESHWARI	Female	47	PA	O GROUP	Rh+VE	Svims Administrative Staff	YES	COVISHEILD	84	Headache,Myalgia,Fever	YES	Mild	No	NILL	5.5	62	22.7	NO	NO	DAILY	< 7hrs	NO	NO	NONVEGETARIAN	URBAN	NUCLAR	99.5	POSITIVE	10.07	POSITIVE	#N/A	#N/A	#N/A	#N/A
816	VINOD KUMAR	Male	34	SUPERVISOR	O GROUP	Rh+VE	Svims Administrative Staff	YES	COVISHEILD	84	None	No	NA	No	NILL	5.8	65	21.8	NO	NO	DAILY	< 7hrs	NO	YES	NONVEGETARIAN	URBAN	NUCLAR	99.23	POSITIVE	10.06	POSITIVE	#N/A	#N/A	#N/A	#N/A
817	HARI BABU	Male	42	SECURITY GAURD	O GROUP	Rh+VE	Hospital support staff	YES	COVISHEILD	84	None	No	NA	No	NILL	5.4	60	22.7	NO	NO	NONE	< 7hrs	NO	NO	NONVEGETARIAN	URBAN	NUCLAR	98.37	POSITIVE	6.18	POSITIVE	#N/A	#N/A	#N/A	#N/A
818	KALYANI	Female	29	STAFF NURSE	O GROUP	Rh+VE	Nurse	No	not vaccinated	na	None	YES	Mild	No	NILL	5.3	58	22.7	NO	NO	NONE	< 7hrs	NO	NO	NONVEGETARIAN	URBAN	NUCLAR	94.31	POSITIVE	16.04	POSITIVE	82.1517	POSITIVE	29.8449	POSITIVE
819	SUBRAMANYAM	Male	50	SECURITY GAURD	Unknown	UNKNOWN	Hospital support staff	YES	COVISHEILD	80	Myalgia	No	NA	No	NILL	5.6	61	21.7	NO	NO	NONE	< 7hrs	NO	NO	NONVEGETARIAN	URBAN	NUCLAR	78.5	POSITIVE	2.44	POSITIVE	#N/A	#N/A	#N/A	#N/A
820	SUBRAMANYAM	Male	29	SENIOR RESIDENT	O GROUP	Rh+VE	Doctor/Clinician	YES	Covaxin	32	None	No	NA	Yes	NILL	6	96	28.7	NO	NO	NONE	< 7hrs	NO	YES	NONVEGETARIAN	URBAN	SINGLE	91.78	POSITIVE	32.11	POSITIVE	#N/A	#N/A	#N/A	#N/A
821	Adhi Krishnaiah	Male	56	Deputy Director Svims - SPMCW	O GROUP	Rh+VE	Doctor/Clinician	YES	COVISHEILD	60	Fever,Myalgia	YES	Mild	Yes	NILL	5.4	75	28.4	NO	YES	DAILY	< 7hrs	YES	NO	NONVEGETARIAN	URBAN	NUCLAR	99.31	POSITIVE	12.68	POSITIVE	#N/A	#N/A	#N/A	#N/A
822	Vindhya	Female	36	PA	B GROUP	Rh+VE	Svims Administrative Staff	YES	COVISHEILD	28	Myalgia,Fever	YES	Mild	No	NILL	5.4	69	26.1	NO	NO	NONE	< 7hrs	NO	NO	NONVEGETARIAN	URBAN	NUCLAR	72.63	POSITIVE	11.03	POSITIVE	98.56	POSITIVE	37.56	POSITIVE
823	Sharon Singh	Male	49	Principal	O GROUP	Rh+VE	Doctor/Clinician	YES	COVISHEILD	64	Irritability	No	NA	Yes	NILL	5.6	83	29.5	NO	NO	DAILY	< 7hrs	YES	YES	NONVEGETARIAN	URBAN	NUCLAR	54.19	POSITIVE	1.55	NEGATIVE	99.192	POSITIVE	35.1399	POSITIVE
824	Pujitha	Female	32	Tutor	A GROUP	Rh-VE	Hospital support staff	YES	COVISHEILD	28	None	YES	Mild	No	NILL	5.6	56	19.9	NO	NO	NONE	< 7hrs	NO	YES	NONVEGETARIAN	URBAN	NUCLAR	97.89	POSITIVE	6.87	POSITIVE	#N/A	#N/A	#N/A	#N/A
825	Vani	Female	29	Tutor	B GROUP	Rh+VE	Hospital support staff	YES	COVISHEILD	60	Fever	No	NA	No	NILL	5.4	53	20.1	NO	NO	NONE	< 7hrs	NO	YES	NONVEGETARIAN	URBAN	NUCLAR	98.84	POSITIVE	13.58	POSITIVE	#N/A	#N/A	#N/A	#N/A
826	Venkata Narayana	Male	33	Lab Technician	O GROUP	Rh+VE	Laboratory Technician	YES	COVISHEILD	33	Fever	YES	Mild	Yes	NILL	5.3	65	25.4	NO	NO	NONE	< 7hrs	NO	NO	NONVEGETARIAN	URBAN	NUCLAR	98.87	POSITIVE	8.49	POSITIVE	#N/A	#N/A	#N/A	#N/A
827	Venakatramana	Male	43	Ward boy	B GROUP	Rh-VE	Multipurpose worker	YES	COVISHEILD	84	Fever	No	NA	No	NILL	5.2	65	26.2	NO	NO	DAILY	< 7hrs	NO	NO	NONVEGETARIAN	URBAN	NUCLAR	98.88	POSITIVE	7.41	POSITIVE	#N/A	#N/A	#N/A	#N/A
828	Hari Prasad	Male	39	PA	B GROUP	Rh+VE	Svims Administrative Staff	YES	COVISHEILD	60	None	No	NA	No	NILL	6	90	26.9	NO	NO	NONE	< 7hrs	NO	NO	VEGETARIAN	URBAN	NUCLAR	99.18	POSITIVE	8.43	POSITIVE	#N/A	#N/A	#N/A	#N/A
829	PRIYANKA	Female	25	STAFF NURSE	B GROUP	Rh-VE	Nurse	YES	COVISHEILD	29	None	No	NA	Yes	NILL	5.3	52	20.3	NO	NO	NONE	< 7hrs	NO	NO	NONVEGETARIAN	URBAN	SINGLE	71.12	POSITIVE	2.87	POSITIVE	#N/A	#N/A	#N/A	#N/A
830	DAYAKAR	Male	26	UROLOGY TECHNICIAN	B GROUP	Rh+VE	Laboratory Technician	YES	COVISHEILD	28	Myalgia	No	NA	Yes	NILL	6	78	23.3	NO	YES	DAILY	7-8hrs	NO	NO	NONVEGETARIAN	RURAL	NUCLAR	63.15	POSITIVE	4.32	POSITIVE	#N/A	#N/A	#N/A	#N/A
831	KRISHNA KUMAR	Male	29	ASSISTANT PROFESSOR ( MEDICINE)	O GROUP	Rh+VE	Doctor/Clinician	YES	COVISHEILD	NA	None	No	NA	Yes	NILL	5.3	78	30.5	NO	NO	DAILY	< 7hrs	NO	NO	NONVEGETARIAN	URBAN	SINGLE	97.43	POSITIVE	8.07	POSITIVE	#N/A	#N/A	#N/A	#N/A
832	GOWTHAMI	Female	24	MBBS INTERSHIP	A GROUP	Rh+VE	Doctor/Clinician	YES	COVISHEILD	NA	None	No	NA	Yes	NILL	6	78	23.3	NO	NO	WEEKLY	7-8hrs	NO	NO	NONVEGETARIAN	URBAN	SINGLE	99.23	POSITIVE	8.71	POSITIVE	#N/A	#N/A	#N/A	#N/A
833	HEMALATHA	Female	29	DOCTOR	B GROUP	Rh+VE	Doctor/Clinician	YES	Covaxin	35	None	No	NA	Yes	NILL	5.6	72	25.6	NO	NO	NONE	< 7hrs	NO	NO	NONVEGETARIAN	URBAN	NUCLAR	9.38	NEGATIVE	1.37	NEGATIVE	#N/A	#N/A	#N/A	#N/A
834	SAI KRISHNAJA	Female	28	DOCTOR	B GROUP	Rh+VE	Doctor/Clinician	YES	COVISHEILD	32	Fever,Myalgia,Headache	No	NA	Yes	NILL	5.7	62	21.4	NO	NO	WEEKLY	7-8hrs	NO	NO	NONVEGETARIAN	URBAN	SINGLE	67.63	POSITIVE	2.81	POSITIVE	#N/A	#N/A	#N/A	#N/A
835	GEETHA LAHARI	Female	24	MBBS INTERSHIP	O GROUP	Rh-VE	Doctor/Clinician	YES	COVISHEILD	30	None	No	NA	Yes	NILL	5.4	62	23.5	NO	NO	WEEKLY	7-8hrs	YES	NO	VEGETARIAN	URBAN	SINGLE	34.03	NEGATIVE	1.13	NEGATIVE	#N/A	#N/A	#N/A	#N/A
836	GAYATHRI	Female	24	MBBS INTERSHIP	B GROUP	Rh+VE	Doctor/Clinician	YES	COVISHEILD	32	None	No	NA	Yes	NILL	5	55	23.7	NO	NO	NONE	7-8hrs	NO	NO	NONVEGETARIAN	URBAN	SINGLE	32.1	NEGATIVE	1.41	NEGATIVE	#N/A	#N/A	#N/A	#N/A
837	DHANALAKSHMI	Female	48	STAFF NURSE	B GROUP	Rh+VE	Nurse	YES	COVISHEILD	29	None	YES	Asymptomatic	Yes	NILL	5.4	68	25.7	NO	NO	DAILY	7-8hrs	NO	NO	NONVEGETARIAN	URBAN	NUCLAR	98.66	POSITIVE	7.43	POSITIVE	#N/A	#N/A	#N/A	#N/A
838	ASWINI	Female	27	PHYSIO STUDENT	B GROUP	Rh+VE	OTHERS	YES	Covaxin	29	None	YES	Moderate	Yes	NILL	5.6	65	23.1	NO	NO	NONE	7-8hrs	NO	NO	NONVEGETARIAN	URBAN	NUCLAR	97.32	POSITIVE	19.59	POSITIVE	#N/A	#N/A	#N/A	#N/A
839	BHASKAR	Male	53	MALE NURSING	B GROUP	Rh+VE	Nurse	YES	COVISHEILD	28	None	YES	Mild	Yes	NILL	5.7	67	23.1	NO	NO	DAILY	< 7hrs	NO	NO	NONVEGETARIAN	URBAN	NUCLAR	99.57	POSITIVE	12.4	POSITIVE	94.9876	POSITIVE	47.7327	POSITIVE
840	RAJA	Male	30	PA (MRD)	B GROUP	Rh+VE	OTHERS	YES	COVISHEILD	80	None	No	NA	Yes	NILL	5.5	93	34.1	NO	NO	NONE	< 7hrs	NO	NO	NONVEGETARIAN	RURAL	NUCLAR	98.93	POSITIVE	6.79	POSITIVE	#N/A	#N/A	#N/A	#N/A
841	PURNACHANDRA	Male	37	PA ( AROGYASREE)	B GROUP	Rh+VE	Hospital support staff	YES	COVISHEILD	56	Myalgia,Headache,Fever	YES	Mild	Yes	NILL	5.7	68	23.5	NO	NO	NONE	< 7hrs	YES	NO	VEGETARIAN	RURAL	NUCLAR	99.3	POSITIVE	10.08	POSITIVE	#N/A	#N/A	#N/A	#N/A
842	ARPAN KUMAR	Male	26	GENERAL SURGERY ( P.G)	AB GROUP	Rh+VE	Doctor/Clinician	YES	COVISHEILD	49	Myalgia	YES	Mild	Yes	NILL	5.7	80	27.6	NO	NO	NONE	< 7hrs	YES	NO	NONVEGETARIAN	URBAN	NUCLAR	99.43	POSITIVE	10.01	POSITIVE	#N/A	#N/A	#N/A	#N/A
843	SHANMUGAM	Male	33	PHARMACIST	B GROUP	Rh+VE	Doctor/Clinician	YES	COVISHEILD	37	None	No	NA	Yes	NILL	5.5	64	23.5	NO	NO	NONE	< 7hrs	NO	NO	NONVEGETARIAN	URBAN	NUCLAR	99.03	POSITIVE	8.97	POSITIVE	#N/A	#N/A	#N/A	#N/A
844	VEENA	Female	27	PHARMACIST	AB GROUP	Rh+VE	Doctor/Clinician	YES	COVISHEILD	29	None	YES	Asymptomatic	No	NILL	5.5	50	18.3	NO	NO	DAILY	< 7hrs	YES	YES	NONVEGETARIAN	URBAN	NUCLAR	99.16	POSITIVE	17.43	POSITIVE	#N/A	#N/A	#N/A	#N/A
845	SREERAMULU	Male	43	STORE BOY	Unknown	UNKNOWN	Hospital support staff	YES	COVISHEILD	84	Fever,Myalgia	YES	Mild	No	NILL	5.4	57	21.6	NO	NO	NONE	< 7hrs	NO	NO	NONVEGETARIAN	URBAN	NUCLAR	99.29	POSITIVE	12.16	POSITIVE	#N/A	#N/A	#N/A	#N/A
846	SREENIVASULU	Male	48	STORE BOY	Unknown	UNKNOWN	Hospital support staff	YES	COVISHEILD	60	Fever,Myalgia	No	NA	No	NILL	5.4	59	22.3	NO	NO	NONE	< 7hrs	NO	NO	NONVEGETARIAN	URBAN	NUCLAR	98.81	POSITIVE	8.86	POSITIVE	#N/A	#N/A	#N/A	#N/A
847	JAGADESH	Male	28	ANEASTHISIA TECHNICIAN	O GROUP	Rh+VE	Laboratory Technician	YES	COVISHEILD	68	Fever	YES	Mild	No	NILL	5.7	62	21.4	NO	YES	NONE	< 7hrs	NO	NO	NONVEGETARIAN	URBAN	NUCLAR	95.51	POSITIVE	4.38	POSITIVE	97.45	POSITIVE	39.21	POSITIVE
848	BALAJI	Male	42	ANEASTHISIA TECHNICIAN	B GROUP	Rh+VE	Laboratory Technician	YES	COVISHEILD	34	Fever,Myalgia	YES	Moderate	Yes	NILL	5.4	84	31.8	NO	NO	NONE	< 7hrs	NO	NO	NONVEGETARIAN	URBAN	NUCLAR	99.25	POSITIVE	14.49	POSITIVE	#N/A	#N/A	#N/A	#N/A
849	LAKSHMAN BABU	Male	30	STORE BOY	B GROUP	Rh+VE	Hospital support staff	YES	COVISHEILD	58	Myalgia	No	NA	No	NILL	5.4	62	23.5	YES	YES	DAILY	< 7hrs	NO	NO	NONVEGETARIAN	URBAN	NUCLAR	76.98	POSITIVE	2.57	POSITIVE	#N/A	#N/A	#N/A	#N/A
850	BHARATHI	Female	31	PHARMACIST	O GROUP	Rh+VE	Doctor/Clinician	YES	COVISHEILD	36	Myalgia,Fever	No	NA	Yes	NILL	5.2	60	24.2	NO	NO	DAILY	< 7hrs	NO	NO	NONVEGETARIAN	URBAN	NUCLAR	98.88	POSITIVE	6.79	POSITIVE	94.8881	POSITIVE	39.6706	POSITIVE
851	SANGEETHA	Female	28	PHARMACIST	B GROUP	Rh+VE	Doctor/Clinician	YES	COVISHEILD	86	Irritability	YES	Asymptomatic	No	NILL	5.2	58	23.4	NO	NO	NONE	< 7hrs	NO	NO	NONVEGETARIAN	URBAN	NUCLAR	99.38	POSITIVE	12.69	POSITIVE	#N/A	#N/A	#N/A	#N/A
852	RAVICHANDRA	Male	50	DOCTOR	A GROUP	Rh-VE	Doctor/Clinician	YES	COVISHEILD	30	None	No	NA	Yes	NILL	5.4	66	25	NO	NO	DAILY	7-8hrs	NO	NO	NONVEGETARIAN	URBAN	NUCLAR	33.28	NEGATIVE	0.87	NEGATIVE	77.7363	POSITIVE	38.7601	POSITIVE
853	NARENDRA	Male	49	DOCTOR	O GROUP	Rh+VE	Doctor/Clinician	YES	COVISHEILD	56	Myalgia	No	NA	Yes	NILL	5.6	63	22.4	NO	NO	DAILY	7-8hrs	NO	NO	VEGETARIAN	URBAN	NUCLAR	44.01	NEGATIVE	1.39	NEGATIVE	61.2065	POSITIVE	9.47255	POSITIVE
854	GANGIREDDY	Male	53	PA	Unknown	UNKNOWN	Multipurpose worker	YES	COVISHEILD	85	None	No	NA	No	NILL	5.4	65	24.6	NO	NO	DAILY	7-8hrs	NO	NO	NONVEGETARIAN	URBAN	NUCLAR	51.56	POSITIVE	2.03	POSITIVE	#N/A	#N/A	#N/A	#N/A
855	MAHESWARNATH	Male	52	PA	O GROUP	Rh+VE	Multipurpose worker	YES	Covaxin	42	None	No	NA	No	NILL	5.6	80	28.5	YES	YES	DAILY	7-8hrs	NO	NO	NONVEGETARIAN	URBAN	NUCLAR	69.49	POSITIVE	6.42	POSITIVE	#N/A	#N/A	#N/A	#N/A
856	JAYARAMREDDY	Male	46	ELECTRICIAN	Unknown	UNKNOWN	Multipurpose worker	YES	COVISHEILD	90	None	No	NA	No	NILL	5.4	84	31.8	NO	NO	DAILY	7-8hrs	NO	NO	NONVEGETARIAN	URBAN	NUCLAR	52.07	POSITIVE	1.56	NEGATIVE	97.1144	POSITIVE	34.7363	POSITIVE
857	NAVEENKUMAR	Male	33	ENGINEER	B GROUP	Rh+VE	Multipurpose worker	YES	COVISHEILD	84	Fever,Myalgia	YES	Mild	No	NILL	5.7	78	26.9	YES	YES	DAILY	7-8hrs	NO	NO	NONVEGETARIAN	URBAN	NUCLAR	99.27	POSITIVE	13.17	POSITIVE	84.8383	POSITIVE	23.9248	POSITIVE
858	THEJASWI	Female	23	DOCTOR	B GROUP	Rh+VE	Svims Administrative Staff	YES	COVISHEILD	84	Fever,Irritability	No	NA	Yes	NILL	5.5	73	26.8	NO	NO	DAILY	7-8hrs	NO	NO	NONVEGETARIAN	RURAL	NUCLAR	96.63	POSITIVE	6.39	POSITIVE	#N/A	#N/A	#N/A	#N/A
859	DR. LATHA	Female	41	DOCTOR	B GROUP	Rh+VE	Doctor/Clinician	YES	COVISHEILD	28	None	No	NA	No	NILL	5.4	62	23.5	NO	NO	DAILY	7-8hrs	NO	NO	NONVEGETARIAN	URBAN	NUCLAR	50.66	POSITIVE	2.22	POSITIVE	93.3085	POSITIVE	39.2697	POSITIVE
860	SYAMALA	Female	44	STAFF NURSE	A GROUP	Rh+VE	Nurse	YES	COVISHEILD	95	None	No	NA	No	NILL	5.3	63	24.6	NO	NO	DAILY	7-8hrs	NO	NO	NONVEGETARIAN	RURAL	NUCLAR	25.01	NEGATIVE	1.12	NEGATIVE	#N/A	#N/A	#N/A	#N/A
861	KUNNEMMA	Female	34	STAFF NURSE	O GROUP	Rh+VE	Nurse	YES	COVISHEILD	60	None	No	NA	Yes	NILL	5.4	54	20.4	NO	NO	DAILY	7-8hrs	NO	NO	NONVEGETARIAN	RURAL	NUCLAR	99.1	POSITIVE	5.2	POSITIVE	#N/A	#N/A	#N/A	#N/A
862	SRI RAM PRASAD	Male	55	SECURITY GAURD	B GROUP	Rh+VE	OTHERS	YES	COVISHEILD	28	None	No	NA	No	NILL	5.4	65	24.6	YES	YES	DAILY	7-8hrs	NO	NO	NONVEGETARIAN	URBAN	NUCLAR	99.18	POSITIVE	6.009	POSITIVE	#N/A	#N/A	#N/A	#N/A
863	DARSHANI	Female	20	STUDENT	O GROUP	Rh+VE	Hospital support staff	YES	COVISHEILD	28	None	No	NA	No	NILL	5.4	70	26.5	NO	NO	DAILY	< 7hrs	NO	NO	NONVEGETARIAN	URBAN	NUCLAR	93.06	POSITIVE	2.45	POSITIVE	69.0672	POSITIVE	41.8353	POSITIVE
864	NANDHANI	Female	21	STUDENT	B GROUP	Rh+VE	Svims Administrative Staff	YES	COVISHEILD	28	Fever	No	NA	No	NILL	5.4	58	21.9	NO	NO	NONE	> 8hrs	NO	NO	NONVEGETARIAN	URBAN	NUCLAR	75.16	POSITIVE	0.34	NEGATIVE	#N/A	#N/A	#N/A	#N/A
865	MANUSHA	Female	24	STUDENT	A GROUP	Rh+VE	OTHERS	YES	COVISHEILD	30	Fever	YES	Mild	No	NILL	5	63	27.1	NO	NO	NONE	< 7hrs	NO	NO	NONVEGETARIAN	URBAN	SINGLE	99.46	POSITIVE	6.79	POSITIVE	99.56	POSITIVE	42.23	POSITIVE
866	BHAVYA	Female	22	STUDENT	B GROUP	Rh+VE	OTHERS	YES	COVISHEILD	52	Irritability	No	NA	No	NILL	5	45	19.4	NO	NO	NONE	< 7hrs	NO	NO	NONVEGETARIAN	URBAN	SINGLE	98.85	POSITIVE	5.29	POSITIVE	#N/A	#N/A	#N/A	#N/A
867	GOVARNDANA LEELA	Female	22	STUDENT	B GROUP	Rh+VE	OTHERS	YES	COVISHEILD	35	Fever,Myalgia	No	NA	No	NILL	5.4	82	31	NO	NO	DAILY	< 7hrs	NO	YES	NONVEGETARIAN	URBAN	SINGLE	98.63	POSITIVE	6.54	POSITIVE	#N/A	#N/A	#N/A	#N/A
868	RAMESH	Male	58	ELECTRICIAN	O GROUP	Rh+VE	Hospital support staff	YES	Covaxin	32	None	No	NA	No	NILL	5.2	68	27.4	NO	NO	NONE	< 7hrs	NO	NO	NONVEGETARIAN	URBAN	NUCLAR	74.39	POSITIVE	0.64	NEGATIVE	#N/A	#N/A	#N/A	#N/A
869	RISHITHA	Female	20	STUDENT	A GROUP	Rh+VE	OTHERS	YES	COVISHEILD	84	Fever,Myalgia	YES	Mild	No	NILL	5.2	55	22.2	NO	NO	DAILY	< 7hrs	NO	NO	NONVEGETARIAN	URBAN	SINGLE	99.21	POSITIVE	10.76	POSITIVE	#N/A	#N/A	#N/A	#N/A
870	JEEVAGNA	Female	22	STUDENT	O GROUP	Rh+VE	OTHERS	YES	COVISHEILD	38	Fever	No	NA	No	NILL	5.2	61	24.6	NO	NO	DAILY	< 7hrs	NO	NO	NONVEGETARIAN	URBAN	SINGLE	55.48	POSITIVE	2.01	POSITIVE	#N/A	#N/A	#N/A	#N/A
871	BHAVISHYA	Female	22	STUDENT	B GROUP	Rh+VE	OTHERS	YES	COVISHEILD	40	None	No	NA	No	NILL	5.2	61	24.6	NO	NO	NONE	< 7hrs	NO	NO	NONVEGETARIAN	URBAN	NUCLAR	71.17	POSITIVE	1.44	NEGATIVE	#N/A	#N/A	#N/A	#N/A
872	JAHNAVI	Female	27	MEDICAL OFFICER	A GROUP	Rh+VE	Doctor/Clinician	No	not vaccinated	na	None	YES	Mild	Yes	NILL	5.4	64	24.2	NO	NO	NONE	< 7hrs	NO	NO	VEGETARIAN	URBAN	NUCLAR	91.16	POSITIVE	3.23	POSITIVE	97.98	POSITIVE	35.12	POSITIVE
873	BHAVANA	Female	22	STUDENT	O GROUP	Rh+VE	OTHERS	YES	COVISHEILD	40	Fever,Myalgia	No	NA	No	NILL	4.6	55	29.2	NO	NO	NONE	< 7hrs	NO	NO	NONVEGETARIAN	URBAN	SINGLE	68.13	POSITIVE	1.51	NEGATIVE	#N/A	#N/A	#N/A	#N/A
874	ANUSHA	Female	21	STUDENT	B GROUP	Rh+VE	OTHERS	YES	COVISHEILD	42	Fever	No	NA	No	NILL	5.3	51	19.9	NO	NO	NONE	< 7hrs	NO	NO	NONVEGETARIAN	URBAN	SINGLE	80.39	POSITIVE	1.42	NEGATIVE	#N/A	#N/A	#N/A	#N/A
875	JAHNAVI	Female	22	STUDENT	AB GROUP	Rh+VE	OTHERS	YES	COVISHEILD	60	None	No	NA	No	NILL	5.3	65	25.4	NO	NO	DAILY	< 7hrs	NO	NO	NONVEGETARIAN	URBAN	SINGLE	84.03	POSITIVE	1.49	NEGATIVE	#N/A	#N/A	#N/A	#N/A
876	GURU SAI SRUJANI	Female	22	STUDENT	B GROUP	Rh+VE	OTHERS	YES	COVISHEILD	48	Fever,Myalgia	No	NA	No	NILL	5.2	59	23.8	NO	NO	NONE	< 7hrs	NO	NO	NONVEGETARIAN	URBAN	NUCLAR	98.11	POSITIVE	4.35	POSITIVE	#N/A	#N/A	#N/A	#N/A
877	HEMA DEEPTHI	Female	22	STUDENT	B GROUP	Rh-VE	OTHERS	YES	COVISHEILD	38	None	No	NA	No	NILL	4.9	48	22.9	NO	NO	NONE	< 7hrs	NO	NO	NONVEGETARIAN	URBAN	SINGLE	72.41	POSITIVE	1.31	NEGATIVE	#N/A	#N/A	#N/A	#N/A
878	JAYA SREE SAI LAKSHMI	Female	22	STUDENT	O GROUP	Rh+VE	OTHERS	YES	COVISHEILD	38	Fever	No	NA	No	NILL	5.3	50	19.5	NO	NO	NONE	< 7hrs	NO	NO	NONVEGETARIAN	URBAN	SINGLE	77.02	POSITIVE	1.26	NEGATIVE	#N/A	#N/A	#N/A	#N/A
879	HASYA	Female	21	STUDENT	O GROUP	Rh+VE	OTHERS	YES	COVISHEILD	48	Fever,Myalgia	No	NA	No	NILL	5.6	61	21.7	NO	NO	DAILY	< 7hrs	NO	NO	NONVEGETARIAN	URBAN	SINGLE	69.88	POSITIVE	1.25	NEGATIVE	#N/A	#N/A	#N/A	#N/A
880	INDRAJA	Female	22	STUDENT	B GROUP	Rh+VE	OTHERS	YES	COVISHEILD	48	Fever,Myalgia	No	NA	No	NILL	5.5	58	21.3	NO	NO	DAILY	< 7hrs	NO	NO	NONVEGETARIAN	URBAN	SINGLE	99.44	POSITIVE	7.93	POSITIVE	#N/A	#N/A	#N/A	#N/A
881	ARUNABAI	Female	23	STUDENT	AB GROUP	Rh+VE	OTHERS	YES	COVISHEILD	38	Irritability,Myalgia	No	NA	No	NILL	5.1	40	16.7	NO	NO	NONE	< 7hrs	NO	NO	NONVEGETARIAN	URBAN	SINGLE	99.47	POSITIVE	5.84	POSITIVE	#N/A	#N/A	#N/A	#N/A
882	SREEJA	Female	21	STUDENT	O GROUP	Rh+VE	OTHERS	YES	COVISHEILD	44	Fever,Myalgia	No	NA	No	NILL	5	40	17.2	NO	NO	NONE	< 7hrs	NO	NO	NONVEGETARIAN	URBAN	SINGLE	98.76	POSITIVE	1.37	NEGATIVE	#N/A	#N/A	#N/A	#N/A
883	SWETHA BHAVANI	Female	23	STUDENT	O GROUP	Rh+VE	OTHERS	YES	COVISHEILD	42	None	No	NA	No	NILL	5	59	25.4	NO	NO	NONE	< 7hrs	NO	NO	NONVEGETARIAN	URBAN	SINGLE	70.72	POSITIVE	1.09	NEGATIVE	#N/A	#N/A	#N/A	#N/A
884	TEJA PRIYA	Female	22	STUDENT	B GROUP	Rh+VE	OTHERS	YES	COVISHEILD	42	Myalgia	No	NA	No	NILL	5.2	62	25	NO	NO	NONE	< 7hrs	NO	NO	NONVEGETARIAN	URBAN	SINGLE	99.25	POSITIVE	3.7	POSITIVE	#N/A	#N/A	#N/A	#N/A
885	VINEESHA REDDY	Female	23	STUDENT	B GROUP	Rh+VE	OTHERS	YES	COVISHEILD	48	Fever	No	NA	No	NILL	5.2	63	25.4	NO	NO	WEEKLY	< 7hrs	NO	NO	NONVEGETARIAN	URBAN	SINGLE	99.54	POSITIVE	6.13	POSITIVE	#N/A	#N/A	#N/A	#N/A
886	LAKSHMI	Female	49	SECRETARY TUDA	A GROUP	Rh+VE	OTHERS	YES	COVISHEILD	42	Fever,Headache,Irritability,Myalgia	No	NA	No	NILL	5.2	79	31.9	NO	NO	DAILY	< 7hrs	NO	NO	VEGETARIAN	URBAN	NUCLAR	55.53	POSITIVE	1.58	NEGATIVE	#N/A	#N/A	#N/A	#N/A
887	NAGA RAJA	Male	56	SENIOR ARTIST	O GROUP	Rh+VE	Hospital support staff	YES	COVISHEILD	84	None	YES	Mild	No	NILL	5.4	90	34.1	NO	NO	DAILY	< 7hrs	NO	NO	VEGETARIAN	URBAN	NUCLAR	99.03	POSITIVE	15.01	POSITIVE	#N/A	#N/A	#N/A	#N/A
888	KESAVULU	Male	52	ATTENDER	O GROUP	Rh+VE	Hospital support staff	YES	COVISHEILD	42	None	No	NA	No	NILL	5.3	68	26.6	NO	NO	NONE	< 7hrs	NO	NO	NONVEGETARIAN	URBAN	NUCLAR	99.12	POSITIVE	5.46	POSITIVE	#N/A	#N/A	#N/A	#N/A
889	VENKATESH	Male	27	PHOTOGRAPHER	O GROUP	Rh+VE	Hospital support staff	YES	COVISHEILD	60	None	No	NA	No	NILL	5.1	85	35.4	NO	NO	NONE	< 7hrs	NO	NO	NONVEGETARIAN	URBAN	SINGLE	99.41	POSITIVE	6.75	POSITIVE	#N/A	#N/A	#N/A	#N/A
890	HARI PRASAD	Male	28	ARTIST	B GROUP	Rh+VE	Hospital support staff	YES	COVISHEILD	58	Fever	No	NA	No	NILL	5.6	70	24.9	NO	NO	NONE	< 7hrs	NO	NO	NONVEGETARIAN	URBAN	NUCLAR	99.52	POSITIVE	9.34	POSITIVE	#N/A	#N/A	#N/A	#N/A
891	UMA	Female	32	DIALYSIS TECHNICIAN	O GROUP	Rh+VE	Laboratory Technician	YES	COVISHEILD	84	Fever	No	NA	Yes	NILL	5.4	75	28.4	NO	NO	DAILY	< 7hrs	NO	NO	NONVEGETARIAN	URBAN	NUCLAR	98.23	POSITIVE	5.04	POSITIVE	#N/A	#N/A	#N/A	#N/A
892	DEEPA	Female	40	DIALYSIS TECHNICIAN	O GROUP	Rh+VE	Laboratory Technician	YES	COVISHEILD	84	None	No	NA	Yes	NILL	5	46	19.8	NO	NO	NONE	< 7hrs	NO	NO	NONVEGETARIAN	URBAN	NUCLAR	93.23	POSITIVE	3.47	POSITIVE	#N/A	#N/A	#N/A	#N/A
893	MANJULA	Female	50	STAFF NURSE	A GROUP	Rh-VE	Nurse	YES	COVISHEILD	42	Myalgia	No	NA	Yes	NILL	5.2	79	31.9	NO	NO	NONE	< 7hrs	NO	YES	NONVEGETARIAN	URBAN	NUCLAR	24.84	NEGATIVE	0.83	NEGATIVE	#N/A	#N/A	#N/A	#N/A
894	SUMATHI	Female	35	LAB TECHNICIAN	A GROUP	Rh+VE	Laboratory Technician	YES	Covaxin	35	Myalgia	No	NA	Yes	NILL	5.2	58	23.4	NO	NO	NONE	< 7hrs	YES	YES	NONVEGETARIAN	URBAN	NUCLAR	98.57	POSITIVE	17.48	POSITIVE	#N/A	#N/A	#N/A	#N/A
895	SURESH	Male	42	AREA MANAGER JAYAMITRA	O GROUP	Rh+VE	OTHERS	YES	Covaxin	32	None	No	NA	No	NILL	5.4	85	32.2	NO	YES	DAILY	< 7hrs	NO	NO	NONVEGETARIAN	URBAN	NUCLAR	99.52	POSITIVE	12.09	POSITIVE	#N/A	#N/A	#N/A	#N/A
896	RAVINDRANATH	Male	33	SALES MANAGER JAYAMITRA	B GROUP	Rh+VE	OTHERS	No	not vaccinated	na	None	No	NA	No	NILL	5.7	77	26.6	NO	NO	NONE	< 7hrs	NO	NO	NONVEGETARIAN	URBAN	NUCLAR	98.43	POSITIVE	3.98	POSITIVE	#N/A	#N/A	#N/A	#N/A
897	GOPAL KRISHNA MURTHY	Male	61	S G SURGICALS	O GROUP	Rh+VE	OTHERS	YES	Covaxin	84	None	YES	Mild	No	NILL	5.4	85	32.2	NO	NO	NONE	< 7hrs	NO	NO	VEGETARIAN	URBAN	NUCLAR	92.84	POSITIVE	14.05	POSITIVE	#N/A	#N/A	#N/A	#N/A
898	PRANEETH	Male	36	S G SURGICALS	O GROUP	Rh+VE	OTHERS	YES	Covaxin	60	None	No	NA	No	NILL	5.5	80	29.3	YES	YES	NONE	< 7hrs	NO	NO	NONVEGETARIAN	URBAN	NUCLAR	73.75	POSITIVE	8.6	POSITIVE	#N/A	#N/A	#N/A	#N/A
899	SURENDRA BABU	Male	38	LAB TECHNICIAN	Unknown	UNKNOWN	OTHERS	No	not vaccinated	na	None	No	NA	No	NILL	5.6	75	26.7	NO	NO	DAILY	7-8hrs	NO	NO	NONVEGETARIAN	URBAN	NUCLAR	37.91	NEGATIVE	1.52	NEGATIVE	#N/A	#N/A	#N/A	#N/A
900	KRISHNA SIMHA REDDY	Male	52	HOD EMERGENCY MEDICINE	B GROUP	Rh+VE	Doctor/Clinician	YES	COVISHEILD	76	Myalgia,Fever	YES	Severe	Yes	NILL	5.6	88	31.3	NO	NO	DAILY	< 7hrs	NO	NO	NONVEGETARIAN	URBAN	NUCLAR	97.93	POSITIVE	10.14	POSITIVE	#N/A	#N/A	#N/A	#N/A
901	BENERJEE	Male	56	MAINTENANCE INCHARGE	B GROUP	Rh+VE	Svims Administrative Staff	YES	COVISHEILD	30	None	YES	Asymptomatic	No	NILL	5.6	68	24.2	NO	YES	DAILY	< 7hrs	NO	NO	NONVEGETARIAN	URBAN	NUCLAR	99.23	POSITIVE	12.41	POSITIVE	#N/A	#N/A	#N/A	#N/A
902	MEENAKSHI	Female	49	DOCTOR	O GROUP	Rh+VE	Doctor/Clinician	YES	COVISHEILD	35	Fever,Myalgia	No	NA	Yes	NILL	5.4	58	21.9	NO	NO	DAILY	< 7hrs	NO	NO	VEGETARIAN	URBAN	NUCLAR	89.6	POSITIVE	6.34	POSITIVE	#N/A	#N/A	#N/A	#N/A
903	LATHA	Female	35	ANEASTHISIA TECHNICIAN	O GROUP	Rh-VE	Laboratory Technician	YES	COVISHEILD	60	Fever,Myalgia	No	NA	Yes	NILL	5.4	63	23.8	NO	NO	DAILY	< 7hrs	YES	NO	NONVEGETARIAN	URBAN	NUCLAR	38.53	NEGATIVE	2.31	POSITIVE	#N/A	#N/A	#N/A	#N/A
904	CHANDINI	Female	30	STAFF NURSE	O GROUP	Rh+VE	Nurse	YES	COVISHEILD	84	Irritability	YES	Mild	Yes	NILL	5.4	68	25.7	NO	NO	NONE	< 7hrs	NO	NO	NONVEGETARIAN	URBAN	NUCLAR	98.22	POSITIVE	17.78	POSITIVE	#N/A	#N/A	#N/A	#N/A
905	ANANDA KUMAR	Male	26	JUNIOR RESEARCH FELLOW	O GROUP	Rh+VE	Researchers	YES	COVISHEILD	60	Fever,Myalgia	No	NA	No	NILL	5.6	54	19.2	NO	NO	NONE	< 7hrs	NO	NO	NONVEGETARIAN	URBAN	SINGLE	76.49	POSITIVE	4.29	POSITIVE	#N/A	#N/A	#N/A	#N/A
906	APSANA	Female	22	STUDENT	O GROUP	Rh+VE	OTHERS	YES	COVISHEILD	45	None	No	NA	Yes	NILL	5.3	59	23	NO	NO	DAILY	< 7hrs	NO	NO	NONVEGETARIAN	URBAN	NUCLAR	98.8	POSITIVE	9.66	POSITIVE	#N/A	#N/A	#N/A	#N/A
907	RAJA SULOCHANA	Female	21	STUDENT	B GROUP	Rh+VE	OTHERS	YES	COVISHEILD	38	Fever,Myalgia,Headache	YES	Asymptomatic	Yes	NILL	5	42	18.1	NO	NO	NONE	< 7hrs	NO	NO	NONVEGETARIAN	URBAN	SINGLE	73.21	POSITIVE	2.38	POSITIVE	95.69	POSITIVE	41.36	POSITIVE
908	DAKSHITA	Female	21	STUDENT	O GROUP	Rh+VE	OTHERS	YES	COVISHEILD	30	Fever,Myalgia,Headache,Irritability	No	NA	Yes	NILL	5.4	52	19.7	NO	NO	NONE	< 7hrs	NO	NO	NONVEGETARIAN	URBAN	SINGLE	29.73	NEGATIVE	1.22	NEGATIVE	96.4055	POSITIVE	37.5895	POSITIVE
909	BINDU	Female	21	STUDENT	AB GROUP	Rh+VE	OTHERS	YES	COVISHEILD	32	Myalgia,Fever	No	NA	No	NILL	4.8	54	26.7	NO	NO	DAILY	> 8hrs	NO	NO	VEGETARIAN	URBAN	SINGLE	37.82	NEGATIVE	1.3	NEGATIVE	#N/A	#N/A	#N/A	#N/A
910	ANUKRATI	Female	21	STUDENT	A GROUP	Rh+VE	OTHERS	YES	COVISHEILD	28	Fever,Headache	No	NA	Yes	NILL	5.4	79	29.9	NO	NO	DAILY	7-8hrs	NO	NO	VEGETARIAN	URBAN	SINGLE	94.81	POSITIVE	5.07	POSITIVE	#N/A	#N/A	#N/A	#N/A
911	ANJALI	Female	22	STUDENT	B GROUP	Rh+VE	OTHERS	YES	COVISHEILD	34	Headache	No	NA	Yes	NILL	4.11	42	18.7	NO	NO	WEEKLY	7-8hrs	NO	NO	NONVEGETARIAN	URBAN	SINGLE	99	POSITIVE	20.22	POSITIVE	#N/A	#N/A	#N/A	#N/A
912	SEELA BANU	Female	32	DOCTOR	B GROUP	Rh+VE	Doctor/Clinician	YES	COVISHEILD	45	Myalgia,Fever	No	NA	Yes	NILL	5.4	70	26.5	NO	NO	WEEKLY	7-8hrs	NO	NO	VEGETARIAN	URBAN	NUCLAR	99.04	POSITIVE	21.39	POSITIVE	#N/A	#N/A	#N/A	#N/A
913	VENKATA PREETHI	Female	21	STUDENT	B GROUP	Rh+VE	OTHERS	YES	COVISHEILD	29	None	No	NA	Yes	NILL	5.3	60	23.4	NO	NO	DAILY	< 7hrs	NO	NO	NONVEGETARIAN	URBAN	SINGLE	6.54	NEGATIVE	1.005	NEGATIVE	#N/A	#N/A	#N/A	#N/A
914	VENKATA SAI DEEPTHI	Female	21	STUDENT	O GROUP	Rh+VE	OTHERS	YES	COVISHEILD	34	Fever	No	NA	Yes	NILL	5.5	67	24.6	NO	NO	DAILY	< 7hrs	NO	NO	VEGETARIAN	URBAN	SINGLE	49.28	NEGATIVE	1.44	NEGATIVE	#N/A	#N/A	#N/A	#N/A
915	PUJITHA	Female	20	STUDENT	B GROUP	Rh+VE	OTHERS	YES	COVISHEILD	38	Myalgia	No	NA	Yes	NILL	5.3	57	22.3	NO	NO	DAILY	< 7hrs	NO	NO	NONVEGETARIAN	URBAN	SINGLE	97.92	POSITIVE	7.47	POSITIVE	#N/A	#N/A	#N/A	#N/A
916	VINEESHA REDDY	Female	22	STUDENT	O GROUP	Rh+VE	OTHERS	YES	COVISHEILD	28	Fever,Myalgia	No	NA	Yes	NILL	5.5	85	31.2	NO	NO	DAILY	< 7hrs	NO	NO	NONVEGETARIAN	URBAN	SINGLE	45.62	NEGATIVE	1.39	NEGATIVE	#N/A	#N/A	#N/A	#N/A
917	PRANATHI ROYAL	Female	21	STUDENT	O GROUP	Rh+VE	OTHERS	YES	COVISHEILD	42	Fever	No	NA	Yes	NILL	5.4	62	23.5	NO	NO	DAILY	< 7hrs	NO	NO	NONVEGETARIAN	URBAN	NUCLAR	76.5	POSITIVE	1.2	NEGATIVE	#N/A	#N/A	#N/A	#N/A
918	DHARANI PRIYA	Female	21	STUDENT	O GROUP	Rh+VE	OTHERS	YES	COVISHEILD	44	Fever	No	NA	Yes	NILL	5.2	54	21.8	NO	NO	DAILY	< 7hrs	NO	NO	NONVEGETARIAN	URBAN	SINGLE	89.62	POSITIVE	6.5	POSITIVE	#N/A	#N/A	#N/A	#N/A
919	YAMINI	Female	20	STUDENT	B GROUP	Rh+VE	OTHERS	YES	COVISHEILD	28	Fever	No	NA	Yes	NILL	5.4	75	28.4	NO	NO	NONE	< 7hrs	NO	NO	NONVEGETARIAN	URBAN	SINGLE	9.39	NEGATIVE	1.2	NEGATIVE	#N/A	#N/A	#N/A	#N/A
920	KAVYA	Female	23	STUDENT	O GROUP	Rh+VE	OTHERS	YES	COVISHEILD	42	None	No	NA	Yes	NILL	5.7	54	18.6	NO	NO	DAILY	< 7hrs	NO	NO	NONVEGETARIAN	URBAN	SINGLE	96.09	POSITIVE	6.54	POSITIVE	#N/A	#N/A	#N/A	#N/A
921	KEERTHI	Female	21	STUDENT	B GROUP	Rh+VE	OTHERS	YES	COVISHEILD	60	None	No	NA	Yes	NILL	5.5	40	14.7	NO	NO	NONE	< 7hrs	NO	NO	NONVEGETARIAN	URBAN	SINGLE	79.14	POSITIVE	2.78	POSITIVE	#N/A	#N/A	#N/A	#N/A
922	KEERTHI	Female	21	STUDENT	A GROUP	Rh+VE	OTHERS	YES	COVISHEILD	38	None	No	NA	Yes	NILL	5.4	52	19.7	NO	NO	NONE	< 7hrs	NO	NO	VEGETARIAN	URBAN	SINGLE	53.53	POSITIVE	1.35	NEGATIVE	#N/A	#N/A	#N/A	#N/A
923	VAISHNAVI	Female	21	STUDENT	B GROUP	Rh-VE	OTHERS	YES	COVISHEILD	42	Myalgia,Fever	No	NA	Yes	NILL	5.2	53	21.4	NO	NO	NONE	< 7hrs	NO	NO	NONVEGETARIAN	URBAN	SINGLE	99.18	POSITIVE	27.11	POSITIVE	#N/A	#N/A	#N/A	#N/A
924	SREE SRITHA	Female	21	STUDENT	B GROUP	Rh+VE	OTHERS	YES	COVISHEILD	38	None	YES	Mild	Yes	NILL	5.2	53	21.4	NO	NO	DAILY	< 7hrs	NO	NO	NONVEGETARIAN	URBAN	SINGLE	99.54	POSITIVE	14.13	POSITIVE	#N/A	#N/A	#N/A	#N/A
925	CHENCHAIAH	Male	34	WELDER	A GROUP	Rh-VE	Hospital support staff	YES	COVISHEILD	84	None	YES	Mild	No	NILL	5.9	70	22.8	NO	NO	DAILY	< 7hrs	NO	NO	NONVEGETARIAN	URBAN	NUCLAR	99.34	POSITIVE	12.22	POSITIVE	#N/A	#N/A	#N/A	#N/A
926	KESAVULU	Male	40	FITTER	O GROUP	Rh+VE	OTHERS	YES	COVISHEILD	84	None	No	NA	No	NILL	5.4	70	26.5	NO	NO	DAILY	< 7hrs	NO	NO	NONVEGETARIAN	URBAN	NUCLAR	99.32	POSITIVE	8.57	POSITIVE	#N/A	#N/A	#N/A	#N/A
927	RADHA	Female	40	MRD TECHNICIAN	O GROUP	Rh+VE	Hospital support staff	YES	COVISHEILD	84	None	No	NA	No	NILL	5.4	45	17	NO	NO	NONE	< 7hrs	NO	NO	NONVEGETARIAN	URBAN	NUCLAR	98.91	POSITIVE	9.84	POSITIVE	#N/A	#N/A	#N/A	#N/A
928	RAMYA	Female	23	STUDENT	AB GROUP	Rh+VE	OTHERS	YES	COVISHEILD	38	None	YES	Severe	Yes	NILL	5.2	46	18.5	NO	NO	DAILY	< 7hrs	NO	NO	VEGETARIAN	URBAN	SINGLE	95.11	POSITIVE	6.11	POSITIVE	97.67	POSITIVE	38.96	POSITIVE
929	PRAVALLIKA	Female	22	STUDENT	A GROUP	Rh+VE	OTHERS	YES	COVISHEILD	38	None	YES	Mild	Yes	NILL	5.4	58	21.9	NO	NO	WEEKLY	< 7hrs	NO	NO	NONVEGETARIAN	URBAN	SINGLE	98.45	POSITIVE	9.68	POSITIVE	#N/A	#N/A	#N/A	#N/A
930	BABY PADMASRI	Female	21	STUDENT	B GROUP	Rh+VE	OTHERS	YES	COVISHEILD	34	Myalgia,Headache	No	NA	Yes	NILL	5.4	50	18.9	NO	NO	WEEKLY	< 7hrs	NO	NO	NONVEGETARIAN	URBAN	SINGLE	99.39	POSITIVE	8.93	POSITIVE	87.25	POSITIVE	32.56	POSITIVE
931	PAVANI	Female	22	STUDENT	B GROUP	Rh+VE	OTHERS	YES	COVISHEILD	28	None	No	NA	Yes	NILL	5.4	52	19.7	NO	NO	WEEKLY	< 7hrs	NO	NO	NONVEGETARIAN	URBAN	SINGLE	62.3	POSITIVE	1.49	NEGATIVE	#N/A	#N/A	#N/A	#N/A
932	NOSHITHA	Female	21	STUDENT	O GROUP	Rh+VE	OTHERS	YES	COVISHEILD	56	None	No	NA	Yes	NILL	5.5	47	17.2	NO	NO	NONE	< 7hrs	NO	NO	NONVEGETARIAN	URBAN	SINGLE	81.34	POSITIVE	2.54	POSITIVE	#N/A	#N/A	#N/A	#N/A
933	ALIA NASREEN	Female	21	STUDENT	B GROUP	Rh+VE	OTHERS	YES	COVISHEILD	29	Fever	No	NA	Yes	NILL	5.2	46	18.5	NO	NO	WEEKLY	< 7hrs	NO	NO	NONVEGETARIAN	URBAN	SINGLE	95.39	POSITIVE	6.65	POSITIVE	88.1095	POSITIVE	19.4976	POSITIVE
934	VENNELA	Female	23	STUDENT	O GROUP	Rh+VE	OTHERS	YES	COVISHEILD	35	Headache,Fever	No	NA	Yes	NILL	5.3	83	32.4	NO	NO	WEEKLY	< 7hrs	NO	NO	VEGETARIAN	URBAN	SINGLE	96.8	POSITIVE	7.03	POSITIVE	#N/A	#N/A	#N/A	#N/A
935	ANUHYA	Female	22	STUDENT	O GROUP	Rh+VE	OTHERS	YES	COVISHEILD	56	Fever	No	NA	Yes	NILL	5.7	85	29.3	NO	NO	NONE	< 7hrs	NO	NO	NONVEGETARIAN	URBAN	SINGLE	91.16	POSITIVE	4.74	POSITIVE	#N/A	#N/A	#N/A	#N/A
936	BINDU MADHAVI	Female	22	STUDENT	O GROUP	Rh+VE	OTHERS	YES	COVISHEILD	38	None	No	NA	Yes	NILL	5.2	60	24.2	NO	NO	DAILY	< 7hrs	NO	NO	VEGETARIAN	URBAN	SINGLE	1.34	NEGATIVE	1.25	NEGATIVE	#N/A	#N/A	#N/A	#N/A
937	YUVA KEERTHANA	Female	21	STUDENT	A GROUP	Rh+VE	OTHERS	YES	COVISHEILD	42	None	No	NA	Yes	NILL	5.2	63	25.4	NO	NO	DAILY	< 7hrs	NO	NO	NONVEGETARIAN	URBAN	SINGLE	58.15	POSITIVE	2.45	POSITIVE	#N/A	#N/A	#N/A	#N/A
938	KARUNYA	Female	23	STUDENT	B GROUP	Rh+VE	OTHERS	YES	COVISHEILD	28	None	No	NA	Yes	NILL	5.2	62	25	NO	NO	NONE	< 7hrs	NO	NO	NONVEGETARIAN	URBAN	SINGLE	81.38	POSITIVE	2.54	POSITIVE	#N/A	#N/A	#N/A	#N/A
939	POOJITHA	Female	23	STUDENT	O GROUP	Rh+VE	OTHERS	YES	COVISHEILD	39	Fever,Myalgia,Headache	No	NA	Yes	NILL	5.3	63	24.6	NO	NO	WEEKLY	< 7hrs	NO	NO	NONVEGETARIAN	URBAN	SINGLE	70.62	POSITIVE	3.37	POSITIVE	#N/A	#N/A	#N/A	#N/A
940	HIMASREE	Female	23	STUDENT	B GROUP	Rh-VE	OTHERS	YES	COVISHEILD	56	Fever,Irritability	No	NA	Yes	NILL	5.4	60	22.7	NO	NO	WEEKLY	< 7hrs	NO	NO	NONVEGETARIAN	URBAN	SINGLE	98.91	POSITIVE	8.71	POSITIVE	#N/A	#N/A	#N/A	#N/A
941	SIVANI	Female	23	STUDENT	O GROUP	Rh+VE	OTHERS	YES	COVISHEILD	38	Fever	YES	Mild	Yes	NILL	5.2	45	18.1	NO	NO	WEEKLY	7-8hrs	NO	NO	NONVEGETARIAN	URBAN	SINGLE	93.09	POSITIVE	5.95	POSITIVE	95.34	POSITIVE	39.87	POSITIVE
942	PRANAVI	Female	21	STUDENT	O GROUP	Rh+VE	OTHERS	YES	COVISHEILD	38	Fever,Headache	YES	Mild	Yes	NILL	5.2	50	20.2	NO	NO	DAILY	< 7hrs	YES	YES	NONVEGETARIAN	URBAN	SINGLE	98.82	POSITIVE	8.78	POSITIVE	#N/A	#N/A	#N/A	#N/A
943	NIKITA	Female	20	STUDENT	O GROUP	Rh+VE	OTHERS	YES	COVISHEILD	38	None	No	NA	Yes	NILL	5	68	29.3	NO	NO	WEEKLY	7-8hrs	NO	NO	NONVEGETARIAN	URBAN	SINGLE	29.73	NEGATIVE	1.33	NEGATIVE	#N/A	#N/A	#N/A	#N/A
944	JYOTHIKA	Female	22	STUDENT	A GROUP	Rh-VE	OTHERS	YES	COVISHEILD	40	Fever	YES	Mild	Yes	NILL	5.4	58	21.9	NO	NO	DAILY	< 7hrs	YES	YES	NONVEGETARIAN	URBAN	SINGLE	99.09	POSITIVE	16.55	POSITIVE	#N/A	#N/A	#N/A	#N/A
945	MEGHANA	Female	22	STUDENT	O GROUP	Rh+VE	OTHERS	YES	COVISHEILD	42	None	No	NA	Yes	NILL	5.5	43	15.8	NO	NO	NONE	7-8hrs	YES	YES	NONVEGETARIAN	URBAN	SINGLE	43.01	NEGATIVE	1.49	NEGATIVE	#N/A	#N/A	#N/A	#N/A
946	JOSHIKA BHARATHI	Female	22	MBBS STUDENT	B GROUP	Rh+VE	OTHERS	YES	COVISHEILD	36	Fever,Myalgia	No	NA	Yes	NILL	5	60	25.8	NO	NO	NONE	< 7hrs	NO	NO	NONVEGETARIAN	URBAN	NUCLAR	99.13	POSITIVE	7.35	POSITIVE	#N/A	#N/A	#N/A	#N/A
947	GAYATHRI	Female	22	MBBS STUDENT	B GROUP	Rh+VE	OTHERS	YES	COVISHEILD	34	Fever,Myalgia	No	NA	No	NILL	5	50	21.5	NO	NO	NONE	< 7hrs	NO	NO	NONVEGETARIAN	URBAN	NUCLAR	97.25	POSITIVE	6.32	POSITIVE	#N/A	#N/A	#N/A	#N/A
948	GOUTHAM HANU	Male	32	ASSISTANT PROFESSOR	B GROUP	Rh-VE	Doctor/Clinician	YES	COVISHEILD	30	Fever,Headache	No	NA	Yes	NILL	5.5	70	25.7	NO	NO	WEEKLY	< 7hrs	NO	NO	NONVEGETARIAN	URBAN	NUCLAR	78.08	POSITIVE	2.75	POSITIVE	#N/A	#N/A	#N/A	#N/A
949	SIVA KUMAR REDDY	Male	31	SENIOR RESIDENT	O GROUP	Rh+VE	Doctor/Clinician	YES	COVISHEILD	30	Fever,Headache	YES	Mild	Yes	NILL	5.11	89	27.4	NO	NO	WEEKLY	< 7hrs	NO	NO	NONVEGETARIAN	URBAN	NUCLAR	99.26	POSITIVE	11.83	POSITIVE	#N/A	#N/A	#N/A	#N/A
950	YADAGIRI	Male	36	RO TECH GRADE 1	O GROUP	Rh+VE	Svims Administrative Staff	YES	COVISHEILD	30	Irritability	No	NA	Yes	NILL	5.11	78	24	NO	NO	NONE	< 7hrs	NO	NO	VEGETARIAN	URBAN	NUCLAR	45.21	NEGATIVE	1.29	NEGATIVE	#N/A	#N/A	#N/A	#N/A
951	DIVIJA	Female	24	STUDENT	O GROUP	Rh+VE	OTHERS	YES	COVISHEILD	60	Irritability	No	NA	Yes	NILL	5.2	96	38.7	NO	NO	NONE	< 7hrs	YES	NO	NONVEGETARIAN	URBAN	SINGLE	4.2	NEGATIVE	1.21	NEGATIVE	#N/A	#N/A	#N/A	#N/A
952	SRAVANI	Female	23	STUDENT	O GROUP	Rh+VE	OTHERS	YES	COVISHEILD	28	Fever,Myalgia	No	NA	Yes	NILL	5.2	52	21	NO	NO	NONE	< 7hrs	NO	NO	NONVEGETARIAN	URBAN	SINGLE	99.02	POSITIVE	10.29	POSITIVE	#N/A	#N/A	#N/A	#N/A
953	TEJASWINI	Female	21	STUDENT	B GROUP	Rh+VE	OTHERS	YES	COVISHEILD	38	Fever,Myalgia	No	NA	Yes	NILL	5.4	79	29.9	NO	NO	NONE	< 7hrs	NO	NO	VEGETARIAN	URBAN	SINGLE	49.82	NEGATIVE	1.19	NEGATIVE	#N/A	#N/A	#N/A	#N/A
954	VIJETHA REDDY	Female	22	STUDENT	B GROUP	Rh+VE	OTHERS	YES	COVISHEILD	35	Fever,Myalgia	YES	Mild	Yes	NILL	5.7	60	20.7	NO	NO	NONE	< 7hrs	NO	NO	NONVEGETARIAN	URBAN	SINGLE	98.89	POSITIVE	13.74	POSITIVE	#N/A	#N/A	#N/A	#N/A
955	BHARATH	Male	29	DOCTOR	B GROUP	Rh+VE	Doctor/Clinician	YES	COVISHEILD	38	Myalgia	No	NA	Yes	NILL	5.8	95	31.8	NO	NO	NONE	< 7hrs	YES	YES	VEGETARIAN	URBAN	NUCLAR	97.76	POSITIVE	5.6	POSITIVE	#N/A	#N/A	#N/A	#N/A
956	PRAVEEN	Male	30	DOCTOR	O GROUP	Rh+VE	Doctor/Clinician	YES	COVISHEILD	30	None	No	NA	Yes	NILL	5.1	80	33.3	NO	NO	DAILY	< 7hrs	NO	NO	NONVEGETARIAN	URBAN	NUCLAR	99.11	POSITIVE	6.21	POSITIVE	91.25	POSITIVE	38.91	POSITIVE
957	VENKATESH V	Male	28	DOCTOR	A GROUP	Rh+VE	Doctor/Clinician	YES	COVISHEILD	30	Fever	YES	Asymptomatic	Yes	NILL	5.9	90	29.3	NO	NO	DAILY	< 7hrs	NO	NO	VEGETARIAN	URBAN	SINGLE	98.26	POSITIVE	11.45	POSITIVE	#N/A	#N/A	#N/A	#N/A
958	POOJITHA	Female	21	STUDENT	O GROUP	Rh+VE	OTHERS	YES	COVISHEILD	90	None	No	NA	Yes	NILL	5.4	48	18.2	NO	NO	NONE	< 7hrs	NO	NO	NONVEGETARIAN	URBAN	SINGLE	86.51	POSITIVE	3.72	POSITIVE	#N/A	#N/A	#N/A	#N/A
959	AISHWARYA REDDY	Female	22	STUDENT	B GROUP	Rh+VE	OTHERS	YES	COVISHEILD	43	None	No	NA	Yes	NILL	5.4	78	29.5	NO	NO	DAILY	< 7hrs	NO	NO	NONVEGETARIAN	URBAN	SINGLE	36.64	NEGATIVE	1.14	NEGATIVE	97.8483	POSITIVE	40.364	POSITIVE
960	YUKTHA	Female	21	STUDENT	O GROUP	Rh+VE	OTHERS	YES	COVISHEILD	60	Fever,Myalgia	No	NA	Yes	NILL	5.8	67	22.5	NO	NO	DAILY	< 7hrs	NO	NO	NONVEGETARIAN	URBAN	SINGLE	66.06	POSITIVE	2.53	POSITIVE	94.6766	POSITIVE	35.9177	POSITIVE
961	JYOTHI SAI REDDY	Female	20	STUDENT	A GROUP	Rh+VE	OTHERS	YES	COVISHEILD	43	Fever	No	NA	Yes	NILL	5.3	56	21.9	NO	NO	NONE	< 7hrs	NO	NO	NONVEGETARIAN	URBAN	SINGLE	77.83	POSITIVE	3.83	POSITIVE	#N/A	#N/A	#N/A	#N/A
962	SRI SAI GITHA	Female	22	STUDENT	AB GROUP	Rh-VE	OTHERS	YES	COVISHEILD	58	Fever,Myalgia	No	NA	Yes	NILL	5.7	87	30	NO	NO	NONE	< 7hrs	NO	NO	VEGETARIAN	URBAN	SINGLE	75.07	POSITIVE	2.62	POSITIVE	#N/A	#N/A	#N/A	#N/A
963	PRAVALIKA	Female	22	STUDENT	B GROUP	Rh+VE	OTHERS	YES	COVISHEILD	35	Fever,Myalgia	No	NA	Yes	NILL	5.4	50	18.9	NO	NO	NONE	< 7hrs	NO	NO	NONVEGETARIAN	URBAN	SINGLE	98.49	POSITIVE	7.4	POSITIVE	#N/A	#N/A	#N/A	#N/A
964	KUSHMA	Female	21	STUDENT	B GROUP	Rh+VE	OTHERS	YES	COVISHEILD	28	None	No	NA	Yes	NILL	5.7	65	22.4	NO	NO	NONE	< 7hrs	NO	NO	NONVEGETARIAN	URBAN	SINGLE	99.07	POSITIVE	7.34	POSITIVE	91.78	POSITIVE	41.25	POSITIVE
965	SAI JAGRUTHI	Female	21	STUDENT	AB GROUP	Rh+VE	OTHERS	YES	COVISHEILD	40	None	No	NA	Yes	NILL	5.5	77	28.2	NO	NO	DAILY	< 7hrs	NO	NO	NONVEGETARIAN	URBAN	SINGLE	39.85	NEGATIVE	1.2	NEGATIVE	#N/A	#N/A	#N/A	#N/A
966	VAHNIKA	Female	22	STUDENT	O GROUP	Rh+VE	OTHERS	YES	COVISHEILD	42	None	No	NA	Yes	NILL	5.6	55	19.6	NO	NO	NONE	< 7hrs	NO	NO	VEGETARIAN	URBAN	SINGLE	98.92	POSITIVE	6.32	POSITIVE	#N/A	#N/A	#N/A	#N/A
967	SAI SINDHU	Female	23	STUDENT	B GROUP	Rh+VE	OTHERS	YES	COVISHEILD	58	None	No	NA	Yes	NILL	5.6	46	16.4	NO	NO	DAILY	< 7hrs	NO	NO	NONVEGETARIAN	URBAN	SINGLE	98.88	POSITIVE	4.98	POSITIVE	#N/A	#N/A	#N/A	#N/A
968	SAI LIKHITHA	Female	22	STUDENT	B GROUP	Rh+VE	OTHERS	YES	COVISHEILD	38	None	No	NA	Yes	NILL	5.7	66	22.8	NO	NO	NONE	< 7hrs	NO	NO	NONVEGETARIAN	URBAN	SINGLE	83.03	POSITIVE	3.83	POSITIVE	#N/A	#N/A	#N/A	#N/A
969	SAI MANVITA	Female	22	STUDENT	O GROUP	Rh+VE	OTHERS	YES	COVISHEILD	36	Irritability	No	NA	Yes	NILL	5.7	59	20.4	NO	NO	NONE	< 7hrs	NO	NO	NONVEGETARIAN	URBAN	SINGLE	99.02	POSITIVE	16.48	POSITIVE	#N/A	#N/A	#N/A	#N/A
970	SABITHA REDDY	Female	23	STUDENT	B GROUP	Rh+VE	OTHERS	YES	COVISHEILD	38	None	No	NA	Yes	NILL	5.5	58	21.3	NO	NO	NONE	< 7hrs	NO	NO	NONVEGETARIAN	URBAN	SINGLE	97.51	POSITIVE	5.63	POSITIVE	#N/A	#N/A	#N/A	#N/A
971	NIKITA	Female	22	STUDENT	O GROUP	Rh+VE	OTHERS	YES	COVISHEILD	36	None	No	NA	Yes	NILL	5.6	75	26.7	NO	NO	DAILY	< 7hrs	NO	NO	NONVEGETARIAN	URBAN	SINGLE	58.88	POSITIVE	1.3	NEGATIVE	#N/A	#N/A	#N/A	#N/A
972	FARHEEN	Female	22	STUDENT	O GROUP	Rh+VE	OTHERS	YES	COVISHEILD	38	None	No	NA	Yes	NILL	5.1	44	18.3	NO	NO	NONE	< 7hrs	NO	NO	NONVEGETARIAN	URBAN	SINGLE	36.18	NEGATIVE	0.805	NEGATIVE	#N/A	#N/A	#N/A	#N/A
973	POOJA	Female	23	STUDENT	O GROUP	Rh+VE	OTHERS	YES	COVISHEILD	36	None	No	NA	Yes	NILL	5.5	58	21.3	NO	NO	DAILY	< 7hrs	NO	NO	NONVEGETARIAN	URBAN	SINGLE	98.44	POSITIVE	7.69	POSITIVE	#N/A	#N/A	#N/A	#N/A
974	NIHARIKA	Female	22	STUDENT	B GROUP	Rh+VE	OTHERS	YES	COVISHEILD	38	Fever,Headache	No	NA	Yes	NILL	5.6	48	17.1	NO	NO	NONE	< 7hrs	NO	NO	NONVEGETARIAN	URBAN	SINGLE	63.3	POSITIVE	1.49	NEGATIVE	#N/A	#N/A	#N/A	#N/A
975	SIREESHA	Female	22	STUDENT	AB GROUP	Rh+VE	OTHERS	YES	COVISHEILD	52	None	No	NA	Yes	NILL	5.2	43	17.3	NO	NO	NONE	< 7hrs	NO	NO	NONVEGETARIAN	URBAN	SINGLE	92.45	POSITIVE	3.97	POSITIVE	#N/A	#N/A	#N/A	#N/A
976	SHAISTHA NAYYAR	Female	21	STUDENT	A GROUP	Rh+VE	OTHERS	YES	Covaxin	34	None	No	NA	Yes	NILL	5	60	25.8	NO	NO	NONE	< 7hrs	NO	NO	NONVEGETARIAN	URBAN	SINGLE	1.51	NEGATIVE	3.35	POSITIVE	#N/A	#N/A	#N/A	#N/A
977	TEJASREE	Female	21	STUDENT	B GROUP	Rh+VE	OTHERS	YES	COVISHEILD	34	Fever	No	NA	Yes	NILL	5.2	54	21.8	NO	NO	NONE	< 7hrs	NO	NO	NONVEGETARIAN	URBAN	SINGLE	93.61	POSITIVE	6.7	POSITIVE	#N/A	#N/A	#N/A	#N/A
978	SAI NICKETTHA	Female	23	STUDENT	A GROUP	Rh+VE	OTHERS	YES	COVISHEILD	33	Myalgia	No	NA	No	NILL	5.2	58	23.4	NO	NO	WEEKLY	7-8hrs	NO	NO	VEGETARIAN	URBAN	NUCLAR	88.59	POSITIVE	1.44	NEGATIVE	#N/A	#N/A	#N/A	#N/A
979	VAHHAJ	Female	22	STUDENT	O GROUP	Rh+VE	OTHERS	YES	COVISHEILD	31	Fever	No	NA	No	NILL	5.2	52	21	NO	NO	NONE	< 7hrs	NO	NO	NONVEGETARIAN	URBAN	SINGLE	63.79	POSITIVE	1.49	NEGATIVE	#N/A	#N/A	#N/A	#N/A
980	SAI PAVANI	Female	22	STUDENT	A GROUP	Rh+VE	OTHERS	YES	COVISHEILD	84	Fever	No	NA	No	NILL	5	60	25.8	NO	NO	NONE	< 7hrs	NO	NO	NONVEGETARIAN	URBAN	SINGLE	95.58	POSITIVE	4.79	POSITIVE	#N/A	#N/A	#N/A	#N/A
981	RAMYASREE	Female	22	STUDENT	B GROUP	Rh+VE	OTHERS	YES	COVISHEILD	48	None	No	NA	No	NILL	5.2	52	21	NO	NO	DAILY	7-8hrs	NO	NO	VEGETARIAN	URBAN	SINGLE	86.75	POSITIVE	4.05	POSITIVE	#N/A	#N/A	#N/A	#N/A
982	SHABEENA	Female	23	STUDENT	O GROUP	Rh+VE	OTHERS	YES	COVISHEILD	43	Fever,Myalgia	No	NA	No	NILL	4.9	44	21	NO	NO	NONE	7-8hrs	NO	NO	NONVEGETARIAN	URBAN	SINGLE	67.11	POSITIVE	3.34	POSITIVE	#N/A	#N/A	#N/A	#N/A
983	SWATHANTHRYA	Female	22	STUDENT	O GROUP	Rh+VE	OTHERS	YES	COVISHEILD	43	None	No	NA	No	NILL	4.9	45	21.5	NO	NO	NONE	> 8hrs	NO	NO	NONVEGETARIAN	URBAN	SINGLE	78.72	POSITIVE	3.69	POSITIVE	#N/A	#N/A	#N/A	#N/A
984	SARANYA	Female	22	STUDENT	B GROUP	Rh+VE	OTHERS	YES	COVISHEILD	30	None	No	NA	Yes	NILL	5.3	65	25.4	NO	NO	WEEKLY	7-8hrs	NO	NO	NONVEGETARIAN	URBAN	SINGLE	1.59	NEGATIVE	0.87	NEGATIVE	#N/A	#N/A	#N/A	#N/A
985	NAZIYA PARVEEN	Female	21	STUDENT	A GROUP	Rh+VE	OTHERS	YES	COVISHEILD	44	None	No	NA	No	NILL	5.3	60	23.4	NO	NO	NONE	7-8hrs	NO	NO	NONVEGETARIAN	URBAN	SINGLE	99.09	POSITIVE	14.4	POSITIVE	#N/A	#N/A	#N/A	#N/A
986	SAI PRIYA	Female	21	STUDENT	B GROUP	Rh+VE	OTHERS	YES	COVISHEILD	31	None	No	NA	Yes	NILL	5.3	78	30.5	NO	NO	DAILY	7-8hrs	NO	NO	VEGETARIAN	URBAN	NUCLAR	78.31	POSITIVE	1.01	NEGATIVE	#N/A	#N/A	#N/A	#N/A
987	SANJANA	Female	21	STUDENT	A GROUP	Rh+VE	OTHERS	YES	COVISHEILD	43	None	No	NA	Yes	NILL	5.5	53	19.4	NO	NO	WEEKLY	7-8hrs	NO	NO	NONVEGETARIAN	URBAN	SINGLE	88.37	POSITIVE	4.99	POSITIVE	#N/A	#N/A	#N/A	#N/A
988	SNEHA	Female	21	STUDENT	O GROUP	Rh-VE	OTHERS	YES	COVISHEILD	43	None	No	NA	No	NILL	5	53	22.8	NO	NO	WEEKLY	7-8hrs	NO	NO	NONVEGETARIAN	URBAN	NUCLAR	93.66	POSITIVE	3.76	POSITIVE	#N/A	#N/A	#N/A	#N/A
989	SAI DEEPTHI	Female	22	STUDENT	B GROUP	Rh+VE	OTHERS	YES	COVISHEILD	42	None	No	NA	No	NILL	5	37	15.9	NO	NO	NONE	7-8hrs	NO	NO	NONVEGETARIAN	URBAN	SINGLE	41.1	NEGATIVE	1.12	NEGATIVE	#N/A	#N/A	#N/A	#N/A
990	SAI NAVEENA	Female	22	STUDENT	O GROUP	Rh+VE	OTHERS	YES	COVISHEILD	42	None	No	NA	No	NILL	4.9	50	23.9	NO	NO	WEEKLY	7-8hrs	NO	NO	NONVEGETARIAN	URBAN	SINGLE	58.39	POSITIVE	1.31	NEGATIVE	#N/A	#N/A	#N/A	#N/A
991	FARIDA	Female	22	STUDENT	B GROUP	Rh+VE	OTHERS	YES	COVISHEILD	43	Fever	No	NA	No	NILL	5.4	53	20.1	NO	NO	NONE	< 7hrs	NO	NO	NONVEGETARIAN	URBAN	SINGLE	98.96	POSITIVE	13.77	POSITIVE	#N/A	#N/A	#N/A	#N/A
992	MAHAMOODA NASREEN	Female	21	STUDENT	O GROUP	Rh+VE	OTHERS	YES	COVISHEILD	NA	Fever,Myalgia	No	NA	No	NILL	5.3	59	23	NO	NO	WEEKLY	7-8hrs	NO	NO	NONVEGETARIAN	URBAN	SINGLE	99.32	POSITIVE	7.805	POSITIVE	#N/A	#N/A	#N/A	#N/A
993	SPANDANA	Female	23	STUDENT	B GROUP	Rh+VE	OTHERS	YES	COVISHEILD	44	Fever,Headache,Myalgia	YES	Mild	Yes	NILL	4.11	58	25.8	NO	NO	NONE	7-8hrs	NO	NO	NONVEGETARIAN	URBAN	SINGLE	98.61	POSITIVE	10.23	POSITIVE	#N/A	#N/A	#N/A	#N/A
994	SRISRUTHI	Female	22	STUDENT	O GROUP	Rh+VE	OTHERS	YES	COVISHEILD	33	Myalgia	YES	Mild	Yes	NILL	5.6	70	24.9	NO	NO	WEEKLY	7-8hrs	NO	NO	NONVEGETARIAN	URBAN	SINGLE	98.002	POSITIVE	7.18	POSITIVE	#N/A	#N/A	#N/A	#N/A
995	KARISHMA	Female	22	STUDENT	O GROUP	Rh+VE	OTHERS	YES	COVISHEILD	55	Fever,Headache,Myalgia	No	NA	No	NILL	5.3	55	21.5	NO	NO	WEEKLY	< 7hrs	NO	NO	NONVEGETARIAN	URBAN	SINGLE	87.08	POSITIVE	1.44	NEGATIVE	#N/A	#N/A	#N/A	#N/A
996	MAITRI	Female	22	STUDENT	B GROUP	Rh+VE	OTHERS	YES	COVISHEILD	34	Fever,Myalgia	No	NA	No	NILL	5.5	72	26.4	NO	NO	WEEKLY	7-8hrs	YES	NO	NONVEGETARIAN	URBAN	SINGLE	71.94	POSITIVE	3.22	POSITIVE	#N/A	#N/A	#N/A	#N/A
997	RASOOL	Male	24	DEO	O GROUP	Rh+VE	OTHERS	No	not vaccinated	na	None	No	NA	No	NILL	5.7	57	19.7	NO	NO	NONE	< 7hrs	NO	NO	NONVEGETARIAN	RURAL	NUCLAR	59.1	POSITIVE	1.3	NEGATIVE	#N/A	#N/A	#N/A	#N/A
998	ANAND	Male	39	DEO	A GROUP	Rh+VE	OTHERS	YES	COVISHEILD	NA	None	No	NA	No	NILL	5.8	72	24.1	YES	YES	NONE	< 7hrs	NO	NO	VEGETARIAN	URBAN	NUCLAR	98.54	POSITIVE	10.1	POSITIVE	#N/A	#N/A	#N/A	#N/A
999	ARJUN	Male	23	STUDENT	B GROUP	Rh+VE	OTHERS	YES	COVISHEILD	58	Fever	No	NA	No	NILL	5.5	78	28.6	NO	NO	NONE	7-8hrs	NO	NO	NONVEGETARIAN	URBAN	SINGLE	96.35	POSITIVE	8.01	POSITIVE	#N/A	#N/A	#N/A	#N/A
1000	RAJESH	Male	34	LAB TECHNICIAN	A GROUP	Rh+VE	Laboratory Technician	YES	COVISHEILD	32	None	YES	Moderate	Yes	NILL	4.9	80	38.2	YES	YES	WEEKLY	< 7hrs	NO	NO	NONVEGETARIAN	URBAN	NUCLAR	97.7	POSITIVE	12.27	POSITIVE	#N/A	#N/A	#N/A	#N/A
1001	REVATHI	Female	38	WARD BOY	Unknown	UNKNOWN	OTHERS	YES	COVISHEILD	NA	None	No	NA	Yes	NILL	4.9	55	26.2	NO	NO	NONE	< 7hrs	NO	NO	NONVEGETARIAN	URBAN	NUCLAR	83.16	POSITIVE	20.44	POSITIVE	90.3109	POSITIVE	34.0764	POSITIVE

## Sheet: Sheet1
Index	[Full Name] First Name	[Full Name] Last Name	Gender	Age Complited:	Mobile No:*	Designation:*	BLOOD GROUP	Rh +VE	Category:*	Vaccination Status:*	Name Of Vaccine:*	Date Of First Dose:*	Date Of Second Dose:*	Gap Between Doses(in days):*	Post Vaccination Symtoms:	History Of Covid-19 Positivity:*	If Yes Date Of Positivity:	If Yes Date Of Positivity:	Gap after positive (days)	Gap Between Positive (no. of days):	Severity of illness:*	[Duration of symptoms(in days):*] Fever	[Duration of symptoms(in days):*] Myalgia	[Duration of symptoms(in days):*] Headache	[Duration of symptoms(in days):*] Cold	[Duration of symptoms(in days):*] DIARROHEA	[Duration of symptoms(in days):*] SOAR THROAT	Involved any in handling of covid-19 positive patient or sample handling:	Any present illness:	General health status:	BMI Height: FEET/INCHES	BMI Weight:	BMI	SMOKING	Alcoholic:	Exercise:	Sleeping pattern:	Acute psychological stress:	Chronic Psychological stress:	Eating habits	Environmental factors:	Family size:	LAB SERIAL NUMBER	Submitter	Submission Date	Submission ID	NAT (Old)	RESULTS	IGG (Old)
37	NEELIMA	BANDILA	Female	33	9000388916	MSc	A GROUP	Rh+VE	Laboratory Technician	No						Yes	2021-05-19				Severe	10	14	14	8	NA	12	Yes	WEAKNESS	NONE	5.3	60	23.4	No	No	daily	< 7hrs	Yes	no	NONVEGETARIAN	urban	NUCLAR	37	Srikar	7/10/2021, 11:41:31 AM	1050ff2c	77.69	POSITIVE	2.62
43	KIRANMAYEE	BANDARI	Female	24	7093864793	BSc mlt	A GROUP	Rh+VE	Laboratory Technician	No						Yes	2021-04-14				Severe	1	3	NA	NA	NA	NA	Yes	NIL	known asthmatic	5.2	40	16.1	No	No	NONE	> 8hrs	No	no	NONVEGETARIAN	urban	NUCLAR	43	Srikar	7/10/2021, 4:12:36 PM	4adbb91c	86.05	POSITIVE	2.77
57	ANUHYA	PEDIRAPPAGARI	Female	24	7780420324	CLINICAL PHARMACIST	O GROUP	Rh+VE	Doctor/Clinician	Yes	Covaxin	44226	44281	45	None	No												No	NIL	NONE	5.6	55	19.6	No	No	NONE	7-8hrs	No	no	NONVEGETARIAN	urban	NUCLAR	57	Srikar	7/12/2021, 11:41:48 AM	80dddcf4	96.08	POSITIVE	7.23
98	LAKSHMIKAMESWERI	US	Female	58	9951337399	FM	B GROUP	Rh+VE	OTHERS	Yes	COVISHEILD			30	None	No												No	NILL	NONE	5	60	25.8	No	No	NONE	< 7hrs	Yes	yes	VEGETARIAN	urban	NUCLAR	98		7/12/2021, 3:27:58 PM	75a1935f	99.68	POSITIVE	11.07
108	SRIDEVI	MARDHAM	Female	25	7032973820	LAB TECHNICIAN	A GROUP	Rh+VE	Laboratory Technician	Yes	Covaxin	44267	44302	30	Headache,Myalgia	No												Yes	NIL	NONE	5.7	98	33.8	No	No	NONE	< 7hrs	Yes	yes	NONVEGETARIAN	urban	NUCLAR	108	Srikar	7/12/2021, 3:19:12 PM	9f06dcff	80.61	POSITIVE	7.31
138	LOKESH BABU	NAMBI	Male	34	9000540546	CARDIOVASCULAR TECHNOLOGY	B GROUP	Rh+VE	Doctor/Clinician	Yes	Covaxin	44287	44334	40	None	Yes	2020-04-16				Asymptomatic	NA	2	NA	NA	NA	NA	Yes	NIL	NONE	5.9	85	27.7	No	No	daily	7-8hrs	No	no	VEGETARIAN	urban	NUCLAR	138	Srikar	7/13/2021, 12:36:32 PM	e2330324	99.28	POSITIVE	12.29
140	AMUDHA VALLI	THOTI	Female	33	9553025479	CARDIOVASCULAR TECHNOLOGIST	O GROUP	Rh+VE	Laboratory Technician	Yes	Covaxin	44287	44562	84	Myalgia	Yes	2021-04-23				Mild	2	NA	NA	NA	NA	NA	Yes	NIL	NONE	4.8	42	20.8	No	No	NONE	> 8hrs	No	no	NONVEGETARIAN	urban	NUCLAR	140	Srikar	7/13/2021, 12:43:26 PM	2452ff81	99.44	POSITIVE	17.5
154	VARUN	PULUGUNDALA	Male	30	9985436555	DOCTOR	AB GROUP	Rh+VE	Doctor/Clinician	Yes	Covaxin	44389	44562	55	Myalgia	Yes	2021-04-17	2022-01-01		NA	Moderate	12	12	5				Yes	WEAKNESS	NONE	5.4	76	28.8	No	Yes	daily	< 7hrs	No	yes	VEGETARIAN	urban	NUCLAR	154	Srikar	7/13/2021, 2:35:46 PM	61c8b838	97.88	POSITIVE	11.01
180	VIJAYA BHARATHI	GOPI	Female	55	9494830610	LT GRADE 1	B GROUP	Rh+VE	Laboratory Technician	Yes	COVISHEILD	44218	44247	28	Headache,Myalgia,Irritability	Yes	2020-10-16				Moderate	15	15	10	NA	NA	5	Yes	NIL	NONE	5.6	72	25.6	No	No	daily	< 7hrs	Yes	no	VEGETARIAN	urban	NUCLAR	180	Srikar	7/14/2021, 9:51:28 AM	7e5bcbf6	98.91	POSITIVE	12.71
181	KAVITHA	NAMPALLE	Female	30	9492842645	LAB TECHNICIAN	O GROUP	Rh-VE	Laboratory Technician	Yes	COVISHEILD	44218	44247	28	None	Yes	2020-10-09				Moderate	5	10	2	NA	NA	2	Yes	NIL	NONE	5.6	59	21	No	No	daily	7-8hrs	No	no	NONVEGETARIAN	urban	NUCLAR	181	Srikar	7/14/2021, 9:54:44 AM	14c8c2d6	99.51	POSITIVE	30.51
184	SUBRAMANIAN	ARCOT	Male	54	9490272953	MRI TECHNICIAN	B GROUP	Rh+VE	Laboratory Technician	Yes	COVISHEILD	44253	44300	32	None	Yes	2021-04-17				Moderate	2	2	2	2	NA	NA	Yes	NIL	NONE	5.3	66	25.8	No	No	NONE	7-8hrs	No	no	NONVEGETARIAN	urban	NUCLAR	184	Srikar	7/14/2021, 10:05:35 AM	73dad9d4	99.64	POSITIVE	21.95
189	VENKATA SUBBAIAH	DANDE	Male	26	9492310804	LAB TECHNICIAN	B GROUP	Rh+VE	Laboratory Technician	Yes	COVISHEILD	44306	44390	64	None	Yes	2020-08-06				Mild	3	1	NA	NA	NA	5	Yes	NIL	NONE	5.9	70	22.8	No	No	NONE	7-8hrs	No	no	NONVEGETARIAN	urban	NUCLAR	189	Srikar	7/14/2021, 10:28:10 AM	52e5bfbc	99.49	POSITIVE	18.85
194	PRAVEEN KUMAR	PORUMALLA	Male	35	9966136836	LAB TECHNICIAN	O GROUP	Rh+VE	Laboratory Technician	Yes	COVISHEILD	44306	44398	84	Fever,Headache,Myalgia,Irritability	Yes	2020-08-19				Severe	10	14	14	14	14	14	Yes	NIL	Known hypertension	5.6	92	32.7	No	Yes	weekly	7-8hrs	Yes	no	NONVEGETARIAN	urban	NUCLAR	194	Srikar	7/14/2021, 10:45:31 AM	95148868	99.49	POSITIVE	34.83
195	CHAKRADHAR	NALAJAM	Male	36	9494369674	PA	A GROUP	Rh+VE	Svims Administrative Staff	Yes	COVISHEILD	44317	44392	84	Fever,Headache,Myalgia,Irritability	No												No	NIL	NONE	5.6	81	28.8	No	No	NONE	7-8hrs	No	no	NONVEGETARIAN	urban	NUCLAR	195	Srikar	7/14/2021, 10:47:32 AM	bb41baec	96.74	POSITIVE	22.59
200	BHANUMATHI	BRAHAMANAPALLI	Female	30	9490973005	STAFF NURSE	B GROUP	Rh-VE	Nurse	Yes	COVISHEILD	44306	44391	82	None	No												Yes	NIL	NONE	5	60	17.1	No	No	NONE	7-8hrs	No	no	NONVEGETARIAN	urban	NUCLAR	200	Srikar	7/14/2021, 11:11:21 AM	e72495f1	99.52	POSITIVE	31.75
204	HEMA LATHA	PENUMURU	Female	56	9490300529	ATTENDER	A GROUP	Rh+VE	OTHERS	Yes	Covaxin	44263	44291	28	None	No												No	NIL	NONE	5.8	75	26.9	No	No	daily	7-8hrs	No	no	VEGETARIAN	urban	NUCLAR	204	Srikar	7/14/2021, 11:35:56 AM	2da3d6e2	96.87	POSITIVE	22.19
208	NAGARAJA REDDY	CHALLA	Male	38	8886961847	DOCTOR	B GROUP	Rh+VE	Doctor/Clinician	Yes	COVISHEILD	44220	44249	28	Irritability	Yes	2020-09-10				Mild	2	2	NA03	3	NA	NA	Yes	NIL	NONE	5.1	72	29.3	No	No	daily	7-8hrs	No	no	NONVEGETARIAN	urban	NUCLAR	208	Srikar	7/14/2021, 11:59:19 AM	281ca8c5	98.61	POSITIVE	21.74
212	SUJATHA	MARATHI	Female	38	8374109575	STAFF NURSE	B GROUP	Rh+VE	Nurse	Yes	Covaxin	44336	44391	48	Fever	Yes	2021-05-21				Mild	2	5	2	5	NA	NA	Yes	NIL	NONE	5.2	52	27.4	No	No	NONE	7-8hrs	No	no	NONVEGETARIAN	urban	NUCLAR	212	Srikar	7/14/2021, 1:57:26 PM	9a74f732	99.06	POSITIVE	29.91
219	manjunath	madira	Male	24	8106247873	LAB TECHNICIAN	O GROUP	Rh+VE	Laboratory Technician	Yes	COVISHEILD	44275	44391	84	Headache	No												No	NIL	NONE	5.8	53	18.5	No	No	NONE	< 7hrs	No	no	NONVEGETARIAN	urban	NUCLAR	219	Srikar	7/14/2021, 2:31:28 PM	1.79769e+308	99.3	POSITIVE	30.82
222	NANDHAGOPAL	KANNAIYAN	Male	42	8281417248	MEDICAL CONSULTENT	B GROUP	Rh+VE	OTHERS	Yes	COVISHEILD	44299	44562	24	Myalgia,Fever	No												No	NIL	NONE	5.6	90	21.8	No	No	NONE	< 7hrs	No	no	NONVEGETARIAN	urban	NUCLAR	222	Srikar	7/14/2021, 2:41:09 PM	cf944753	99.28	POSITIVE	20.97
224	RAJA LAKSHMI	SHANMUGANVELAM	Female	32	9585600845	DOCTOR	A GROUP	Rh+VE	Doctor/Clinician	No						Yes	2021-04-19	2022-01-01		NA	Mild	3	5	4				No	NIL	NONE	5.2	58	23.1	No	No	weekly	7-8hrs	No	no	NONVEGETARIAN	urban	NUCLAR	224	Srikar	7/14/2021, 2:48:56 PM	1bbc35d3	90.29	POSITIVE	17.65
225	DEVA	DURAISWAMY	Male	24	89404708527	MEDICAL CONSULTENT	B GROUP	Rh+VE	OTHERS	No						Yes				NA	Mild		5		5			No	NIL	NONE	6.2	50	23.4	No	No	NONE	< 7hrs	Yes	no	NONVEGETARIAN	urban	SINGLE	225	Srikar	7/14/2021, 2:52:28 PM	ac85d736	70.4	POSITIVE	3.55
231	SHENMUGAVALLI	RAGNABUSHAYA	Female	29	9360027344	hospital support staff	A GROUP	Rh+VE	Hospital support staff	Yes	COVISHEILD	44375	44562	29	Fever,Headache,Myalgia	No												No	NIL	NONE	5.2	60	24.9	No	No	NONE	7-8hrs	No	no	VEGETARIAN	urban	SINGLE	231	Srikar	7/14/2021, 3:11:14 PM	c89e8613	99.56	POSITIVE	30.6
233	SHOBHA RANI	RAYAVARAM	Female	33	9676754534	STAFF NURSE	B GROUP	Rh+VE	Nurse	Yes	COVISHEILD	44339	44562	30	None	No												Yes	NIL	known diabetic	5	60	25	No	No	NONE	7-8hrs	No	no	NONVEGETARIAN	urban	NUCLAR	233	Srikar	7/14/2021, 3:16:29 PM	d1fbab3e	99.57	POSITIVE	24.32
234	RAMADEVI	POLAPALLI	Female	39	7901495017	STAFF NURSE	AB GROUP	Rh+VE	Nurse	Yes	COVISHEILD	44233	44263	30	None	Yes	2021-06-23	2022-01-01		NA	Mild	NA						Yes	NIL	NONE	5.3	70	25.8	No	No	daily	< 7hrs	No	no	NONVEGETARIAN	urban	NUCLAR	234	Srikar	7/14/2021, 3:19:17 PM	c43691cb	99.56	POSITIVE	27.61
235	CHANDRASEKHARREDDY	ATTURU	Male	43	8074418581	PA	O GROUP	Rh+VE	Svims Administrative Staff	Yes	COVISHEILD	44232	44275	40	None	No												No	NIL	NONE	5.7	62	27.3	No	No	daily	7-8hrs	No	no	NONVEGETARIAN	urban	NUCLAR	235	Srikar	7/14/2021, 3:21:56 PM	248866c1	98.02	POSITIVE	18.33
238	BHARGAVI	GURI	Female	29	7680969376	LAB TECHNICIAN	A GROUP	Rh+VE	Laboratory Technician	Yes	COVISHEILD	44306	44562	64	Fever,Headache,Myalgia	No												No	NIL	NONE	5.2	58	22.4	No	No	NONE	7-8hrs	No	yes	NONVEGETARIAN	urban	NUCLAR	238	Srikar	7/14/2021, 3:30:12 PM	2bf6415c	99.36	POSITIVE	19.74
239	DEVIKAMMA	SAPA	Female	32	8520966801	PA	B GROUP	Rh+VE	Svims Administrative Staff	Yes	COVISHEILD	44224	44282	60	Fever,Headache,Myalgia	No												No	NIL	NONE	4.9	63	23.4	No	No	NONE	7-8hrs	No	no	NONVEGETARIAN	urban	NUCLAR	239	Srikar	7/14/2021, 3:33:07 PM	b2eb204c	99.34	POSITIVE	21.29
240	SAHADEVA REDDY	DESEREDDY	Male	47	8309790610	ATTENDER	UNKNOWN		OTHERS	Yes	COVISHEILD			40	Fever	No												No	NIL	NONE	6	58	30.1	No	No	NONE	7-8hrs	No	no	NONVEGETARIAN	urban	NUCLAR	240	Srikar	7/14/2021, 3:37:21 PM	8c74e68e	99.6	POSITIVE	21.36
242	GURUVAIH	POLI	Male	28	9550747564	WARD BOY	B GROUP	Rh+VE	Multipurpose Worker	Yes	COVISHEILD			30	Myalgia	No												No	NIL	NONE	5.1	69	19.6	No	Yes	daily	7-8hrs	No	no	NONVEGETARIAN	rural	NUCLAR	242	Srikar	7/14/2021, 3:55:27 PM	cb234c0d	99.19	POSITIVE	19.18
244	SURESH BABU	BANDI	Male	40	9885454119	ASSISTANT PROFESSOR	B GROUP	Rh+VE	Doctor/Clinician	Yes	COVISHEILD	44251	44279	30	Fever,Myalgia	Yes	2020-10-15				Moderate	03|COUGH 10 DAYS	02|	NA|	NA|	03|	NA|	Yes	NIL	NONE	5.4	75	25.4	No	No	NONE	7-8hrs	No	no	NONVEGETARIAN	urban	NUCLAR	244	Srikar	7/15/2021, 9:51:23 AM	b57ea0aa	99.49	POSITIVE	28.01
247	HARI PRASAD	KOTTE	Male	46	7569796356	WORKER	UNKNOWN		Multipurpose Worker	Yes	Covaxin	44287	44331	45	None	Yes	2020-08-29				Mild	6	5	5	NA	NA	5	Yes	NIL	known asthmatic	5.6	83	27.2	No	Yes	NONE	7-8hrs	No	no	NONVEGETARIAN	urban	NUCLAR	247	Srikar	7/15/2021, 10:12:16 AM	151294c8	93.1	POSITIVE	21.97
251	Lavanya BELLAMKONDA		Female	29	9550097072	PA	B GROUP	Rh+VE	Svims Administrative Staff	YES	COVISHEILD			30	Fever	YES				270	Mild	2, 4, NA, NA, NA, 5						No	WEAKNESS	None	5.4	80	26.5	NO	NO	NONE	< 7hrs	NO	NO	NONVEGETARIAN	URBAN	NUCLAR	251	7/15/2021, 9:55:47 AM	Srikar	3b722bcb	97.74	POSITIVE	36.42
252	DEPPA PANAGIRI		Female	34	9010723857	PA	B GROUP	Rh+VE	OTHERS	YES	COVISHEILD	44318	44350	30	None	YES	8/16/2020	2022-01-01		NA	Mild	3, 3, , , ,						No	NIL	None	5.1	70	30.3	NO	NO	NONE	7-8hrs	NO	NO	NONVEGETARIAN	URBAN	NUCLAR	252	7/15/2021, 9:59:03 AM	Srikar	190eae2f	99.43	POSITIVE	19.66
253	MANOHAR GPOVINDHASWAMY		Male	38	9494064949	LAB TECHNICIAN	A GROUP	Rh+VE	Laboratory Technician	YES	COVISHEILD	44473	6/20/2021	60	Myalgia	YES	6/20/2020	2022-01-01		NA	Mild	1, 2, , , ,						Yes	NIL	Known Diabetic	5.1	73	29.2	NO	YES	NONE	< 7hrs	NO	NO	NONVEGETARIAN	URBAN	NUCLAR	253	7/15/2021, 10:03:29 AM	Srikar	2e873196	99.43	POSITIVE	19.9
254	DHANA BHAGYAVATHI DAMA		Female	43	9849080266	PA	A GROUP	Rh+VE	OTHERS	YES	COVISHEILD	2/25/2021	2/25/2021	30	None	No												No		None	5.6	70	30.4	NO	NO	NONE	7-8hrs	NO	NO	NONVEGETARIAN	URBAN	NUCLAR	254	7/15/2021, 10:22:04 AM	Srikar	30df8ca0	98.92	POSITIVE	19.92
257	RAMA CHEKURI		Female	41	9963259559	PA	O GROUP	Rh+VE	OTHERS	YES	COVISHEILD	2/25/2021	44320	40	Fever, Myalgia	No												No		None	5.8	69	25	NO	NO	NONE	< 7hrs	NO	NO	NONVEGETARIAN	URBAN	NUCLAR	257	7/15/2021, 10:32:47 AM	Srikar	32ff981c	99.41	POSITIVE	18.03
258	ARUNA CHINNAKALAPPAGARI		Female	48	9666487558	PA	B GROUP	Rh+VE	Svims Administrative Staff	YES	Covaxin	44233	7/13/2021	40	Headache	YES	2020-09-12	2022-01-01		NA	Mild	3, , 3, , ,						No	NIL	None	5.4	80	23.1	NO	NO	DAILY	< 7hrs	NO	YES	NONVEGETARIAN	URBAN	NUCLAR	258	7/15/2021, 10:36:35 AM	Srikar	bd36b253	99.19	POSITIVE	27.79
259	PHANISREE CHARUKUPALLI		Female	40	9492958242	PA	O GROUP	Rh+VE	OTHERS	YES	COVISHEILD	44533	4/22/2021	40	Fever	No												No		Known Diabetic, Known Hypertension	5.4	72	30.3	NO	NO	NONE	< 7hrs	YES	YES	VEGETARIAN	URBAN	NUCLAR	259	7/15/2021, 11:04:09 AM	Srikar	a276fef1	99.55	POSITIVE	20.55
261	SUNEELA KOTI		Female	46	9701936079	PA	Unknown		OTHERS	YES	COVISHEILD	4/24/2021	44562	80	None	No												No		None	5.5	84	25.8	NO	NO	NONE	< 7hrs	NO	NO	VEGETARIAN	URBAN	NUCLAR	261	7/15/2021, 11:11:27 AM	Srikar	e58d3ade	99.43	POSITIVE	35.17
262	VINETHALAKSHMI TUPILLA		Female	27	9493065162	PA	O GROUP	Rh+VE	OTHERS	YES	COVISHEILD	2/25/2021	44473	40	Fever	YES	1/30/2021	2021-11-05		120	Mild	, , , 14, ,						No	NIL	None	5.3	54	30.8	NO	NO	DAILY	< 7hrs	NO	YES	NONVEGETARIAN	URBAN	SINGLE	262	7/15/2021, 11:15:20 AM	Srikar	c8fe114e	99.47	POSITIVE	18.15
263	KANTHAMMA IERGU		Female	53	8185021771	HEAD NURSE	B GROUP	Rh+VE	Nurse	YES	COVISHEILD	1/20/2021	44231	75	Headache	YES	2020-12-08	2022-01-01		NA	Severe	14, 14, 5, , , 2						Yes	WEAKNESS	Known Diabetic, Known Hypertension	5	60	32.8	NO	NO	DAILY	< 7hrs	NO	NO	VEGETARIAN	URBAN	NUCLAR	263	7/15/2021, 11:20:15 AM	Srikar	549bf410	99.5	POSITIVE	23.64
270	RAJASEKAR KOTTE		Male	55	9866133728	SENIOR ASSISTANT	O GROUP	Rh+VE	Svims Administrative Staff	YES	COVISHEILD	44472	4/13/2021	30	Myalgia	YES	6/20/2020	2022-01-01		NA	Mild	, 2, , , ,						No	NIL	Known Hypertension	5.8	81	25.6	NO	YES	DAILY	7-8hrs	NO	NO	VEGETARIAN	URBAN	NUCLAR	270	7/15/2021, 12:20:07 PM	Srikar	2f4d57e4	97.14	POSITIVE	9.66
283	SAILAJA MADDALI		Female	45	9666814218	PA	B GROUP	Rh+VE	Svims Administrative Staff	YES	COVISHEILD			84	Myalgia	No												No		Known Diabetic	5.6	85	18.2	NO	NO	DAILY	< 7hrs	NO	NO	VEGETARIAN	URBAN	NUCLAR	283	7/16/2021, 6:10:36 AM	Srikar	5910525b	99.67	POSITIVE	23.08
289	RAJINI PRIYA SODAVADAM ELLAIAH		Female	52	7993044598	HEAD NURSE	A GROUP	Rh+VE	Nurse	YES	COVISHEILD	44502	44504	30	None	YES	8/21/2020				Mild	03, 03, 05, NA, NA, 04						Yes	NA	Known Diabetic, Known Hypertension	5.4	55	22.4	NO	NO	DAILY	< 7hrs	NO	NO	NONVEGETARIAN	URBAN	NUCLAR	289	7/16/2021, 7:35:13 AM	Srikar	96118953	99.58	POSITIVE	24.24
301	MUNEENDRA KOTAKONDA		Male	33	8331872784	hospital support staff	O GROUP	Rh+VE	Hospital support staff	YES	COVISHEILD	1/17/2021	2/23/2021	30	Headache	YES	2020-01-08	2022-01-01		NA	Mild	2, 10, 5, , ,						Yes	NIL	None	5.6	70	24.9	NO	NO	NONE	7-8hrs	NO	NO	NONVEGETARIAN	URBAN	NUCLAR	301	7/16/2021, 10:57:14 AM	Srikar	5e6b60b2	99.46	POSITIVE	19.28
324	BALA RAM JANGAM		Male	49	9399928736	SECURITY GAURD	Unknown		Hospital support staff	YES	COVISHEILD	5/26/2021	8/18/2021	84	None	YES	12/17/2020				Mild	NA, NA, NA, NA, NA, NA						No	NIL	None	5.8	60	20.1	NO	NO	NONE	7-8hrs	NO	NO	NONVEGETARIAN	URBAN	NUCLAR	324	7/17/2021, 6:09:48 AM	Srikar	2be4e163	99.53	POSITIVE	18.1
329	KRISHNAVENI G		Female	43	9492738310	SECURITY GAURD	O GROUP	Rh+VE	Hospital support staff	YES	Covaxin	44441	3/23/2021	36	Headache, Myalgia	No												No	NIL	Known Asthmatic	5.6	65	23.1	NO	NO	NONE	7-8hrs	NO	NO	NONVEGETARIAN	URBAN	NUCLAR	329	7/17/2021, 6:35:53 AM	Srikar	a6be0a51	99.16	POSITIVE	8.85
338	SUNITHA CHANAMBATLA		Female	53	9908041691	NURSING SUPERIDENT	A GROUP	Rh+VE	Nurse	YES	Covaxin			36	Irritability, Myalgia	YES					Mild	02, 03, 03, NA, 2, NA						Yes	NIL	None	5.5	70	25.7	NO	NO	DAILY	< 7hrs	YES	YES	VEGETARIAN	URBAN	NUCLAR	338	7/17/2021, 7:37:05 AM	Srikar	2aeb7c25	98.44	POSITIVE	17.6
346	KOMALA SURISETTY		Female	30	9502782359	MATRON	O GROUP	Rh+VE	OTHERS	YES	COVISHEILD	1/23/2021	2/23/2021	30	None	No												No	NIL	None	5.2	45	18.1	NO	NO	NONE	7-8hrs	NO	NO	VEGETARIAN	URBAN	NUCLAR	346	7/17/2021, 8:03:15 AM	Srikar	b91ca8ba	99.09	POSITIVE	9.93
348	GURU LOKESH AKASAM		Male	23	9912945033	RENAL TRANSPLANTATION	B GROUP	Rh+VE	Laboratory Technician	YES	Covaxin	4/20/2021	7/29/2021	94	None	YES	5/20/2021				Mild	04, 04, 05, 03, 03, NA						Yes	NIL	None	5.4	65	24.6	NO	NO	DAILY	7-8hrs	NO	NO	NONVEGETARIAN	URBAN	SINGLE	348	7/17/2021, 8:10:38 AM	Srikar	3acb425b	98.79	POSITIVE	30.66
352	VIJAYA KUMARI REDDIVARI		Female	51	9705647304	HEAD NURSE	O GROUP	Rh+VE	Nurse	YES	COVISHEILD	4/20/2021	7/14/2021	84	Irritability, Myalgia	YES	6/20/2020				Mild	03, 03, 03, 04, 04, 02						Yes	NIL	Known Diabetic, Known allergic	5.4	62	23.5	NO	NO	DAILY	7-8hrs	YES	YES	NONVEGETARIAN	URBAN	NUCLAR	352	7/17/2021, 8:26:44 AM	Srikar	84d9213c	99.6	POSITIVE	18.91
359	SRAVANI PARADESI		Female	26	9989759448	STAFF NURSE	O GROUP	Rh+VE	Nurse	YES	Covaxin			45	Myalgia	No												Yes	NIL	None	5	45	19.4	NO	NO	WEEKLY	7-8hrs	NO	NO	NONVEGETARIAN	URBAN	NUCLAR	359	7/17/2021, 10:33:35 AM	Srikar	83bc4787	99.49	POSITIVE	11.42
375	DUDDELA NAGAMANI		Female	45	9705972563	PA	B GROUP	Rh+VE	Svims Administrative Staff	YES	COVISHEILD			84	None	No												No	NIL	None	5.8	65	21.8	NO	NO	NONE	7-8hrs	NO	NO	NONVEGETARIAN	URBAN	NUCLAR	375	7/19/2021, 10:00:08 AM	Srikar	d7225b92	99.62	POSITIVE	24.4
377	SANGEETHAM SUJATHA		Female	39	9705325569	STAFF NURSE	O GROUP	Rh+VE	Nurse	YES	Covaxin	44446	8/16/2021	35	None	YES	4/22/2021	4/22/2021		60	Mild	3, , , , ,						No	NIL	None	5.4	52	19.7	NO	NO	NONE	< 7hrs	NO	NO	NONVEGETARIAN	URBAN	NUCLAR	377	7/19/2021, 10:23:30 AM	Srikar	e6e77cee	98.82	POSITIVE	24.71
382	KOTESWARA	POLA	Male	37	9985576804	MRD. TECHNICIAN	B GROUP	Rh+VE	Laboratory Technician	YES	COVISHEILD	44260	44322	60	None	No												No	NIL	Known Hypertension	5.6	65	23.1	NO	YES	DAILY	< 7hrs	NO	NO	NONVEGETARIAN	URBAN	NUCLAR	382	Srikar	7/20/2021, 3:16:40 AM	eff1f297	99.62	POSITIVE	25.42
391	NARESH	BAGADI	Male	30	9866140728	PA	Unknown		OTHERS	YES	COVISHEILD	44385			None	YES	2020-07-16				Mild				05 DAYS			No	NIL	None	5.7	84	29	NO	NO	DAILY	< 7hrs	NO	NO	NONVEGETARIAN	URBAN	NUCLAR	391	Srikar	7/20/2021, 5:57:04 AM	69d56180	99.69	POSITIVE	19.7
400	GRACE VICTORIA	GOCHIPATALA	Female	60	9848668592	ANM	B GROUP	Rh+VE	Nurse	YES	Covaxin	44235	44294	60	None	No												Yes	NIL	None	5.2	60	24.2	NO	NO	NONE	7-8hrs	NO	NO	NONVEGETARIAN	URBAN	NUCLAR	400	Srikar	7/20/2021, 8:20:32 AM	ebcba41	99.76	POSITIVE	8.37
412	DHANALAKSHMI	MALLA	Female	54	8332002307	HEAD NURSE	O GROUP	Rh+VE	Nurse	YES	COVISHEILD	44218	44252	32	Myalgia,Headache	No												Yes	NIL	Known allergic	5.2	64	25.8	NO	NO	WEEKLY	< 7hrs	YES	YES	VEGETARIAN	URBAN	NUCLAR	412	Srikar	7/20/2021, 9:00:11 AM	1.79769e+308	99.31	POSITIVE	9.88
425	RAYAVARAM	SREENIVASULU	Male	42	9440294288	DRIVER	AB GROUP	Rh+VE	OTHERS	YES	COVISHEILD	44310	44396	86	Myalgia	No												No	NIL	None	5.6	58	20.6	NO	NO	DAILY	7-8hrs	YES	YES	NONVEGETARIAN	URBAN	NUCLAR	425	Srikar	7/20/2021, 10:10:12 AM	b497c062	95.39	POSITIVE	18.23
428	CIRIVEL	DHANALAKSHMI	Female	52	9441783496	HEAD NURSE	O GROUP	Rh+VE	Nurse	YES	COVISHEILD				Myalgia,Headache,Fever	No												Yes	NIL	None	5.4	74	28	NO	NO	DAILY	< 7hrs	YES	YES	NONVEGETARIAN	URBAN	NUCLAR	428	Srikar	7/21/2021, 3:01:34 AM	45af22b8	99.59	POSITIVE	24.43
434	NARAGINTI	BHARATHI	Female	42	9966259875	STAFF NURSE	O GROUP	Rh+VE	Nurse	YES	COVISHEILD	44219	44249	30	None	YES	2020-06-11				Moderate	5	3					Yes	NIL	None	5.5	74	27.1	NO	NO	DAILY	7-8hrs	YES	YES	NONVEGETARIAN	RURAL	NUCLAR	434	Srikar	7/21/2021, 3:28:30 AM	3d19fc85	99.56	POSITIVE	20.47
438	BHIMINENI	CHITTIBABU	Male	39	9502873991	DRIVER (G.M.OFFICE)	AB GROUP	Rh+VE	OTHERS	YES	COVISHEILD	44226	44256	36	Fever,Headache	YES	2020-09-10				Mild	2			3			Yes	NIL	None	6.1	105	30.5	NO	NO	WEEKLY	7-8hrs	NO	NO	NONVEGETARIAN	RURAL	NUCLAR	438	Srikar	7/21/2021, 3:47:28 AM	7fc3c666	98.56	POSITIVE	18.97
439	KATARU	KRANTHI	Male	33	8500633179	DRIVER (G.M.OFFICE) TRANSPORT	O GROUP	Rh+VE	OTHERS	YES	COVISHEILD	44219	44253	28	None	YES	2021-05-14				Moderate	3	2	3				Yes	NIL	None	5.7	59	20.4	NO	NO	NONE	7-8hrs	NO	NO	NONVEGETARIAN	URBAN	NUCLAR	439	Srikar	7/21/2021, 3:51:09 AM	3fb30130	98.83	POSITIVE	25.35
445	VADANAPALLE	KIRAN KUMAR	Male	38	9985887700	DOCTOR	A GROUP	Rh+VE	Doctor/Clinician	YES	COVISHEILD	44380			None	No												Yes	NIL	None	5.6	82	29.2	NO	NO	DAILY	7-8hrs	YES	YES	NONVEGETARIAN	URBAN	NUCLAR	445	Srikar	7/21/2021, 4:25:08 AM	f9156eb8	99.57	POSITIVE	22.66
446	PENUBADI	BHARGAV	Male	30	7207307734	DOCTOR	O GROUP	Rh+VE	Doctor/Clinician	No						YES	2021-05-05				Mild	1		1				Yes	NIL	None	5.6	75	26.7	NO	NO	WEEKLY	7-8hrs	NO	NO	NONVEGETARIAN	URBAN	SINGLE	446	Srikar	7/21/2021, 4:27:22 AM	2f60dbcb	82.92	POSITIVE	6.31
454	TUGURU	SAI CHARAN TEJA	Male	26	9849919310	DOCTOR	O GROUP	Rh+VE	Doctor/Clinician	YES	Covaxin	44246	44291	45	None	No												Yes	NIL	None	5.8	69	23.1	NO	NO	WEEKLY	< 7hrs	YES	YES	NONVEGETARIAN	URBAN	NUCLAR	454	Srikar	7/21/2021, 5:11:22 AM	12495736	91.31	POSITIVE	9.03
455	GORANTLA	KUSUMA	Female	58	7989435914	HEAD NURSE	A GROUP	Rh+VE	Nurse	YES	Covaxin	44284	44321	45	None	No												No	NIL	None	5.5	70	25.7	NO	NO	DAILY	7-8hrs	NO	NO	NONVEGETARIAN	URBAN	NUCLAR	455	Srikar	7/21/2021, 5:22:23 AM	552b2279	98.32	POSITIVE	24.97
456	TARUGU	SAI REVANTH	Male	22	9393455556	LAB TECHNICIAN	AB GROUP	Rh+VE	Laboratory Technician	YES	Covaxin	44295	44335	41	None	No												No	NIL	None	5.7	65	22.4	NO	NO	DAILY	7-8hrs	NO	NO	NONVEGETARIAN	URBAN	NUCLAR	456	Srikar	7/21/2021, 5:24:45 AM	f2399c2a	51.13	POSITIVE	10.05
461	KALAKATA	RAJITHA	Female	38	9701528114	STAFF NURSE	B GROUP	Rh+VE	Nurse	YES	COVISHEILD	44219	44278	60	Fever,Headache,Myalgia	YES	2020-07-24				Severe	2 DAYS	7	5	2			Yes	NIL	Known allergic	5.1	52	21.7	NO	NO	DAILY	< 7hrs	YES	NO	NONVEGETARIAN	URBAN	NUCLAR	461	Srikar	7/21/2021, 5:46:05 AM	75508d73	99.53	POSITIVE	18.86
471	VOOTUKOORI	RAMAKRISHNA REDDY	Male	56	9550777634	SECURITY GAURD	A GROUP	Rh+VE	OTHERS	YES	Covaxin	44387			None	No												Yes	NIL	Known allergic	5.7	107	36.9	NO	YES	DAILY	< 7hrs	NO	NO	NONVEGETARIAN	URBAN	NUCLAR	471	Srikar	7/21/2021, 6:21:48 AM	f52a07a4	98.87	POSITIVE	19.65
472	BATTULA	SYAMALA	Female	38	9666355865	LAB TECHNICIAN	A GROUP	Rh+VE	Laboratory Technician	YES	COVISHEILD			38	Headache	YES	2020-09-14				Mild	3			3			Yes	NIL	None	5.6	67	23.8	NO	NO	WEEKLY	< 7hrs	NO	NO	NONVEGETARIAN	URBAN	NUCLAR	472	Srikar	7/21/2021, 6:25:19 AM	8f8f6719	99.27	POSITIVE	18.97
479	JAYALAKSHMI	RAYADURGAM	Female	47	9010512901	PA	A GROUP	Rh-VE	OTHERS	YES	COVISHEILD	44257	44291	33	Fever,Headache	YES	2020-04-10				Asymptomatic	1 DAY						No	NIL	None	5.2	65	26.2	NO	NO	DAILY	< 7hrs	NO	NO	NONVEGETARIAN	URBAN	NUCLAR	479	Srikar	7/21/2021, 8:36:02 AM	33f8ee9e	99.47	POSITIVE	21.4
501	JYOTHEESWARI	ARIPIRALA	Female	37	9490255945	PA	O GROUP	Rh+VE	OTHERS	YES	COVISHEILD	44313	44390	80	Fever	No												No	NIL	Known allergic	5.2	65	26.2	NO	NO	DAILY	7-8hrs	NO	NO	VEGETARIAN	URBAN	NUCLAR	501	Srikar	7/22/2021, 4:35:56 AM	4edee07e	99.4	POSITIVE	13.84
553	SARASWATHI	BALLIKURA	Female	23	7032339307	LAB TECHNICIAN	B GROUP	Rh+VE	Laboratory Technician	YES	Covaxin	2021-07-09	2021-08-16	35	Irritability	YES	2020-08-19				Mild	3	3	NA	NA	NA	NA	Yes	NIL	None	5.2	57	23	NO	NO	DAILY	< 7hrs	NO	NO	NONVEGETARIAN	URBAN	SINGLE	553	Srikar	7/23/2021, 3:45:22 AM	67e3d9ed	99.69	POSITIVE	15.58
594	SHANTHI	VISSA	Female	46	9849052179	ASSOCIATE PROFESSOR	O GROUP	Rh+VE	Doctor/Clinician	YES	COVISHEILD	2021-01-21	2021-02-19	28	Fever	YES	2020-09-10				Severe	15	15					Yes	NIL	None	5.7	65	22.4	NO	NO	NONE	< 7hrs	NO	NO	VEGETARIAN	URBAN	NUCLAR	594	Srikar	7/24/2021, 7:55:22 AM	d0d04756	99.39	POSITIVE	9.91
603	GEETA RANI	PALAGANA	Female	24	8074526538	HOUSE SURGEON	B GROUP	Rh+VE	Doctor/Clinician	No						YES	2021-05-11				Mild	6	NA	NA	2	NA	7	Yes	NIL	None	5	53	22.8	NO	NO	NONE	< 7hrs	NO	NO	NONVEGETARIAN	URBAN	SINGLE	603	Srikar	7/24/2021, 10:00:47 AM	96a87d24	96.81	POSITIVE	5.07
614	SRI KUMARI	VADLAMUDI	Female	51	9490181120	ASSOCIATE PROFESSOR	O GROUP	Rh-VE	Doctor/Clinician	No						YES	2021-04-17				Mild	2	2	1	NA	NA	NA	Yes	NIL	None	5.4	65	24.6	NO	NO	NONE	< 7hrs	NO	NO	NONVEGETARIAN	URBAN	NUCLAR	614	Srikar	7/26/2021, 5:29:15 AM	88cb00d3	98.35	POSITIVE	9.34
650	PAVITHRA	MUDAM	Female	21	9347300378	STUDENT	O GROUP	Rh+VE	OTHERS	No						YES					Mild	NA	3	2	NA	NA	1	No	NIL	None	4.8	48	23.7	NO	NO	NONE	< 7hrs	NO	NO	NONVEGETARIAN	URBAN	SINGLE	650	Srikar	7/27/2021, 8:20:37 AM	8a0cca21	56.23	POSITIVE	5.57
658	VARA PRASAD	V.V	Male	48	9440077266	PA	O GROUP	Rh+VE	Svims Administrative Staff	No						YES	2021-04-24				Mild	04|COUGH 15 DAYS	05|	03|	NA|	NA|	NA|	No	NIL	Known Hypertension	5.3	78	30.5	NO	NO	DAILY	< 7hrs	NO	NO	NONVEGETARIAN	URBAN	NUCLAR	658	Srikar	7/27/2021, 9:12:32 AM	52515bbe	83.91	POSITIVE	9.33
660	ANIL KUMAR	KATHI	Male	29	9182985760	SECURITY GAURD	O GROUP	Rh+VE	Hospital support staff	YES	Covaxin	2021-07-09	2021-08-20	40	None	No												No	NIL	None	6	68	20.3	NO	NO	NONE	< 7hrs	NO	NO	NONVEGETARIAN	URBAN	NUCLAR	660	Srikar	7/27/2021, 9:20:48 AM	353831000000	99.59	POSITIVE	18.64
674	INDIRA	PALAGIRI	Female	48	9010723857	WORKER	Unknown		Hospital support staff	YES	Covaxin	2021-07-05	2021-07-07	32	None	No												Yes	NIL	None	5.4	66	25	NO	NO	NONE	< 7hrs	NO	NO	NONVEGETARIAN	URBAN	NUCLAR	674	Srikar	7/28/2021, 3:32:09 AM	555f804c	99.21	POSITIVE	8.24
677	Kusuma	Medooru	Female	43	9492073327	Assistant Professor	O GROUP	Rh+VE	Doctor/Clinician	YES	COVISHEILD	2021-01-23	2021-02-22	29	Fever,Myalgia	No												No	None	None	5.6 Feet	75	26.7	NO	NO	NONE	7-8hrs	NO	NO	VEGETARIAN	URBAN	NUCLAR	677		7/28/2021, 6:08:11 AM	3175078e	98.16	POSITIVE	10.74
683	MUNI RAJA	BATHALA	Male	36	9652582623	SECURITY GAURD	Unknown		Hospital support staff	YES	Covaxin	2021-07-09	2021-08-16	42	None	No												No	NIL	None	5.8	78	26.1	NO	NO	NONE	< 7hrs	NO	NO	NONVEGETARIAN	URBAN	NUCLAR	683	Srikar	7/28/2021, 6:07:22 AM	ed2b393e	99.69	POSITIVE	12.27
704	SOWJANYA	MANDALA	Female	39	9705833311	DIETITIAN	A GROUP	Rh+VE	Hospital support staff	YES	COVISHEILD	2021-01-28	2021-03-09	52	Myalgia	YES	2021-05-19				Severe		2					Yes	NIL	None	5.5	67	24.6	NO	NO	DAILY	< 7hrs	NO	NO	VEGETARIAN	URBAN	NUCLAR	704	Srikar	7/29/2021, 5:14:58 AM	c009aa13	99.65	POSITIVE	10.69
759	GUNASEKHAR	DAMARACHERLA	Male	39	9502021496	LAB TECHNICIAN	B GROUP	Rh+VE	Laboratory Technician	YES	COVISHEILD	2021-01-18	2021-04-24	90	None	YES	2020-04-09				Asymptomatic							Yes	NIL	Known Diabetic	5.7	82	28.3	NO	NO	DAILY	7-8hrs	NO	NO	VEGETARIAN	RURAL	NUCLAR	759	Srikar	7/30/2021, 4:31:37 AM	c411fcdc	99.61	POSITIVE	12.85
760	VARALAKSHMI	THOTA LOKANADHAM	Female	52	8897048595	HEAD NURSE	A GROUP	Rh+VE	Nurse	YES	COVISHEILD	2021-07-02			None	YES	2021-04-10				Mild	2						Yes	NIL	Known Asthmatic	5.1	80	33.3	NO	NO	WEEKLY	< 7hrs	NO	NO	NONVEGETARIAN	URBAN	NUCLAR	760	Srikar	7/30/2021, 5:07:38 AM	9.9719e+100	99.61	POSITIVE	18.78
777	SUBBA LAKSHMI	RAYANUTHANA	Female	51	9959729142	STAFF NURSE	B GROUP	Rh+VE	Nurse	No						YES	2020-07-15	2021-04-15			Mild	1	NA	NA	NA	NA	NA	Yes	NIL	Known allergic	5	72	31	NO	NO	NONE	< 7hrs	NO	NO	NONVEGETARIAN	URBAN	NUCLAR	777	Srikar	7/30/2021, 6:00:33 AM	46ab095e	99.2	POSITIVE	15.33
781	JAYASREE	G.S	Female	28	9490479379	MSW	Unknown		Hospital support staff	YES	Covaxin	2021-04-10	2021-05-18	48	None	No												No	NIL	None	5	65	28	NO	NO	DAILY	< 7hrs	NO	NO	VEGETARIAN	URBAN	NUCLAR	781	Srikar	7/30/2021, 6:23:57 AM	b3007969	58.16	POSITIVE	8.42
784	SUKRABABU	PULELUKALA	Male	49	8790041367	WARD BOY ( AROGYASREE)	O GROUP	Rh+VE	Hospital support staff	YES	Covaxin	2021-01-29	2021-03-11	45	Myalgia	No												Yes	NIL	None	5.5	65	23.8	NO	YES	NONE	< 7hrs	NO	NO	NONVEGETARIAN	URBAN	NUCLAR	784	Srikar	7/30/2021, 7:54:28 AM	3900e3fc	99.46	POSITIVE	7.52
787	BHABITHA	KONDURU	Female	28	8317515232	DEO ( AROGYASREE)	AB GROUP	Rh+VE	Hospital support staff	YES	COVISHEILD	2021-05-25			None	No												No	NIL	None	5.1	52	21.7	NO	NO	NONE	7-8hrs	NO	NO	VEGETARIAN	URBAN	NUCLAR	787	Srikar	7/30/2021, 7:59:31 AM	1c1849ca	98.43	POSITIVE	11.18
793	MUNI KRISHNADU	VANKAYALA	Male	68	9912442809	LIBRARY ASSISTANT	B GROUP	Rh+VE	Hospital support staff	YES	COVISHEILD	2021-01-20	2021-02-25	35	None	YES	2020-07-09				Asymptomatic	NA	NA	NA	NA	NA	NA	No	NIL	Known Hypertension,Known Diabetic	5.2	65	26.2	NO	NO	DAILY	< 7hrs	NO	NO	VEGETARIAN	URBAN	NUCLAR	793	Srikar	7/30/2021, 8:25:14 AM	b635b7b9	99.22	POSITIVE	10.58
799	RAVI	PARTHASARATHI	Male	58	9441495560	NEUCLEAR MEDICINE TECHNOLOGYST	O GROUP	Rh+VE	Doctor/Clinician	YES	COVISHEILD	2021-01-16	2021-02-18	28	Fever,Myalgia	YES	2020-07-20				Severe	05|COUGH 10 DAYS	05|	NA|	NA|	NA|	NA|	Yes	NIL	Known Hypertension	5.8	105	35.2	NO	NO	NONE	< 7hrs	NO	NO	VEGETARIAN	URBAN	NUCLAR	799	Srikar	7/30/2021, 8:40:20 AM	b0dcecf7	99.36	POSITIVE	16.9
810	SANTHAMMA	DEVARA	Female	42	8790586050	WORKER	Unknown		Hospital support staff	YES	Covaxin	2021-06-16	2021-08-12	60	None	YES	2021-03-10				Mild	3	4	3	NA	2	1	Yes	NIL	None	4.8	65	32.1	NO	NO	DAILY	< 7hrs	NO	NO	NONVEGETARIAN	URBAN	NUCLAR	810	Srikar	7/30/2021, 10:39:59 AM	897ee7ea	98.85	POSITIVE	20.26
812	MADHAVA RAO	BODIGUTTA	Male	38	9849402218	SECURITY SUPERVISOR	O GROUP	Rh+VE	Hospital support staff	YES	Covaxin	2021-02-04	2021-03-04	30	Fever,Myalgia	No												No	NIL	None	5.6	65	23.1	NO	NO	DAILY	< 7hrs	NO	YES	NONVEGETARIAN	URBAN	NUCLAR	812	Srikar	7/31/2021, 5:16:42 AM	b6763821	99.28	POSITIVE	8.4
818	KALYANI	BOLINENI	Female	29	7032908070	STAFF NURSE	O GROUP	Rh+VE	Nurse	No						YES	2021-04-28				Mild	04|COUGH 4 DAYS	04|	01|	NA|	NA|	NA|	No	NIL	None	5.3	58	22.7	NO	NO	NONE	< 7hrs	NO	NO	NONVEGETARIAN	URBAN	NUCLAR	818	Srikar	7/31/2021, 5:53:16 AM	70c82e38	94.31	POSITIVE	16.04
820	SUBRAMANYAM	LAKSHMIPURAM	Male	29	9652300483	SENIOR RESIDENT	O GROUP	Rh+VE	Doctor/Clinician	YES	Covaxin	2021-03-29	2021-04-29	32	None	No												Yes	NIL	None	6	96	28.7	NO	NO	NONE	< 7hrs	NO	YES	NONVEGETARIAN	URBAN	SINGLE	820	Srikar	7/31/2021, 6:05:09 AM	99d459aa	91.78	POSITIVE	32.11
838	ASWINI	PERUGU	Female	27	8790886363	PHYSIO STUDENT	B GROUP	Rh+VE	OTHERS	YES	Covaxin	2021-06-14	2021-07-13	29	None	YES	2021-04-19				Moderate	7	5	4				Yes	NIL	Known Asthmatic	5.6	65	23.1	NO	NO	NONE	7-8hrs	NO	NO	NONVEGETARIAN	URBAN	NUCLAR	838	Srikar	7/31/2021, 8:07:11 AM	1c368c16	97.32	POSITIVE	19.59
841	PURNACHANDRA	PUTTUR	Male	37	9959190687	PA ( AROGYASREE)	B GROUP	Rh+VE	Hospital support staff	YES	COVISHEILD	2021-01-23	2021-04-10	56	Myalgia,Headache,Fever	YES	2020-03-20				Mild	2	2					Yes	NIL	None	5.7	68	23.5	NO	NO	NONE	< 7hrs	YES	NO	VEGETARIAN	RURAL	NUCLAR	841	Srikar	7/31/2021, 8:42:24 AM	b5eab32c	99.3	POSITIVE	10.08
855	MAHESWARNATH	SINGASANI	Male	52	9494365603	PA	O GROUP	Rh+VE	Multipurpose worker	YES	Covaxin	2021-06-04	2021-07-01	42	None	No												No	NIL	None	5.6	80	28.5	YES	YES	DAILY	7-8hrs	NO	NO	NONVEGETARIAN	URBAN	NUCLAR	855	Srikar	8/2/2021, 6:01:26 AM	3995cac4	69.49	POSITIVE	6.42
874	JAHNAVI	PINNAMRAJU	Female	27	9494024884	MEDICAL OFFICER	A GROUP	Rh+VE	Doctor/Clinician	No						YES	2021-05-12				Mild	03|	NA|	03|	04|	NA|	02|	Yes	NIL	None	5.4	64	24.2	NO	NO	NONE	< 7hrs	NO	NO	VEGETARIAN	URBAN	NUCLAR	874	Srikar	8/3/2021, 3:41:01 AM	b5e0ed97	91.16	POSITIVE	3.23
889	NAGA RAJA	C.R	Male	56	9949706367	SENIOR ARTIST	O GROUP	Rh+VE	Hospital support staff	YES	COVISHEILD	4/20/2021	9/16/2021	84	None	YES	4/29/2021				Mild	NA	3	3	NA	NA	NA	No	NIL	Known Hypertension,Known Diabetic	5.4	90	34.1	NO	NO	DAILY	< 7hrs	NO	NO	VEGETARIAN	URBAN	NUCLAR	889	Srikar	8/3/2021, 4:59:21 AM	bfa26a8	99.03	POSITIVE	15.01
896	SUMATHI	PATHIPUTTURU	Female	35	8897133705	LAB TECHNICIAN	A GROUP	Rh+VE	Laboratory Technician	YES	Covaxin	2021-09-07	2021-12-08	35	Myalgia	No												Yes	NIL	Known Asthmatic,Known allergic	5.2	58	23.4	NO	NO	NONE	< 7hrs	YES	YES	NONVEGETARIAN	URBAN	NUCLAR	896	Srikar	8/3/2021, 5:17:35 AM	807ed039	98.57	POSITIVE	17.48
897	SURESH	MADDISETTY	Male	42	9394766994	AREA MANAGER JAYAMITRA	O GROUP	Rh+VE	OTHERS	YES	Covaxin	4/14/2021	5/15/2021	32	None	No												No	NIL	Known Hypertension	5.4	85	32.2	NO	YES	DAILY	< 7hrs	NO	NO	NONVEGETARIAN	URBAN	NUCLAR	897	Srikar	8/3/2021, 5:36:46 AM	3a7e6260	99.52	POSITIVE	12.09
899	GOPAL KRISHNA MURTHY	DINDUKURTHY	Male	61	9849047822	S G SURGICALS	O GROUP	Rh+VE	OTHERS	YES	Covaxin	2021-01-05	8/25/2021	84	None	YES	2021-01-03				Mild	3	3	NA	NA	2	NA	No	NIL	None	5.4	85	32.2	NO	NO	NONE	< 7hrs	NO	NO	VEGETARIAN	URBAN	NUCLAR	899	Srikar	8/3/2021, 5:41:50 AM	5d1432cd	92.84	POSITIVE	14.05
900	PRANEETH	DINDUKURTHY	Male	36	9885222321	S G SURGICALS	O GROUP	Rh+VE	OTHERS	YES	Covaxin	3/20/2021	5/20/2021	60	None	No												No	NIL	None	5.5	80	29.3	YES	YES	NONE	< 7hrs	NO	NO	NONVEGETARIAN	URBAN	NUCLAR	900	Srikar	8/3/2021, 5:43:38 AM	62130b3e	73.75	POSITIVE	8.6
913	ANJALI	PRAJAPAT	Female	22	9983882188	STUDENT	B GROUP	Rh+VE	OTHERS	YES	COVISHEILD	2021-01-30	2021-03-06	34	Headache	No												Yes	NIL	None	4.11	42	18.7	NO	NO	WEEKLY	7-8hrs	NO	NO	NONVEGETARIAN	URBAN	SINGLE	913	Srikar	8/5/2021, 5:59:37 AM	364eb279	99	POSITIVE	20.22
914	SEELA BANU	PRABHAKARA BABU	Female	32	9441370418	DOCTOR	B GROUP	Rh+VE	Doctor/Clinician	YES	COVISHEILD	2021-01-22	2021-03-03	45	Myalgia,Fever	No												Yes	NIL	None	5.4	70	26.5	NO	NO	WEEKLY	7-8hrs	NO	NO	VEGETARIAN	URBAN	NUCLAR	914	Srikar	8/5/2021, 6:10:02 AM	8a319a75	99.04	POSITIVE	21.39
925	VAISHNAVI	KANDULA	Female	21	8919629769	STUDENT	B GROUP	Rh-VE	OTHERS	YES	COVISHEILD	2021-01-27	2021-03-08	42	Myalgia,Fever	No												Yes	NIL	None	5.2	53	21.4	NO	NO	NONE	< 7hrs	NO	NO	NONVEGETARIAN	URBAN	SINGLE	925	Srikar	8/5/2021, 9:21:46 AM	b04bf5fa	99.18	POSITIVE	27.11
959	VENKATESH V	KHARALKAR	Male	28	8892239854	DOCTOR	A GROUP	Rh+VE	Doctor/Clinician	YES	COVISHEILD	2021-02-15	2021-03-17	30	Fever	YES	2020-09-16				Asymptomatic	NA	NA	NA	NA	NA	NA	Yes	NIL	None	5.9	90	29.3	NO	NO	DAILY	< 7hrs	NO	NO	VEGETARIAN	URBAN	SINGLE	959	Srikar	8/7/2021, 6:19:34 AM	3a63ed4f	98.26	POSITIVE	11.45
1000	ANAND	SUNDRAPALYAM	Male	39	9948121577	DEO	A GROUP	Rh+VE	OTHERS	YES	COVISHEILD				None	No												No	NIL	None	5.8	72	24.1	YES	YES	NONE	< 7hrs	NO	NO	VEGETARIAN	URBAN	NUCLAR	1000	Srikar	8/9/2021, 5:16:02 PM	94092a9f	98.54	POSITIVE	10.1
1003	REVATHI	NIMMANAPALLI	Female	38	8106406553	WARD BOY	Unknown		OTHERS	YES	COVISHEILD	2021-07-10			None	No												Yes	NIL	None	4.9	55	26.2	NO	NO	NONE	< 7hrs	NO	NO	NONVEGETARIAN	URBAN	NUCLAR	1003	Srikar	8/10/2021, 10:12:19 AM	676473	83.16	POSITIVE	20.44
[truncated: 5 more columns]
