# Supplementary material for: Persistence of SARS-CoV-2 IgG and Its Avidity Compared with Neutralizing Antibodies among Health Care Workers in a Tertiary Care Hospital, South India – a One Year Follow Up Study
Source: Preprints.org preprint supplement (doi:10.20944/preprints202309.1211.v1), 2023-09-19
Supplement: Supplementary file 3 [file SUPPLYMENTARY FILE 2.docx]

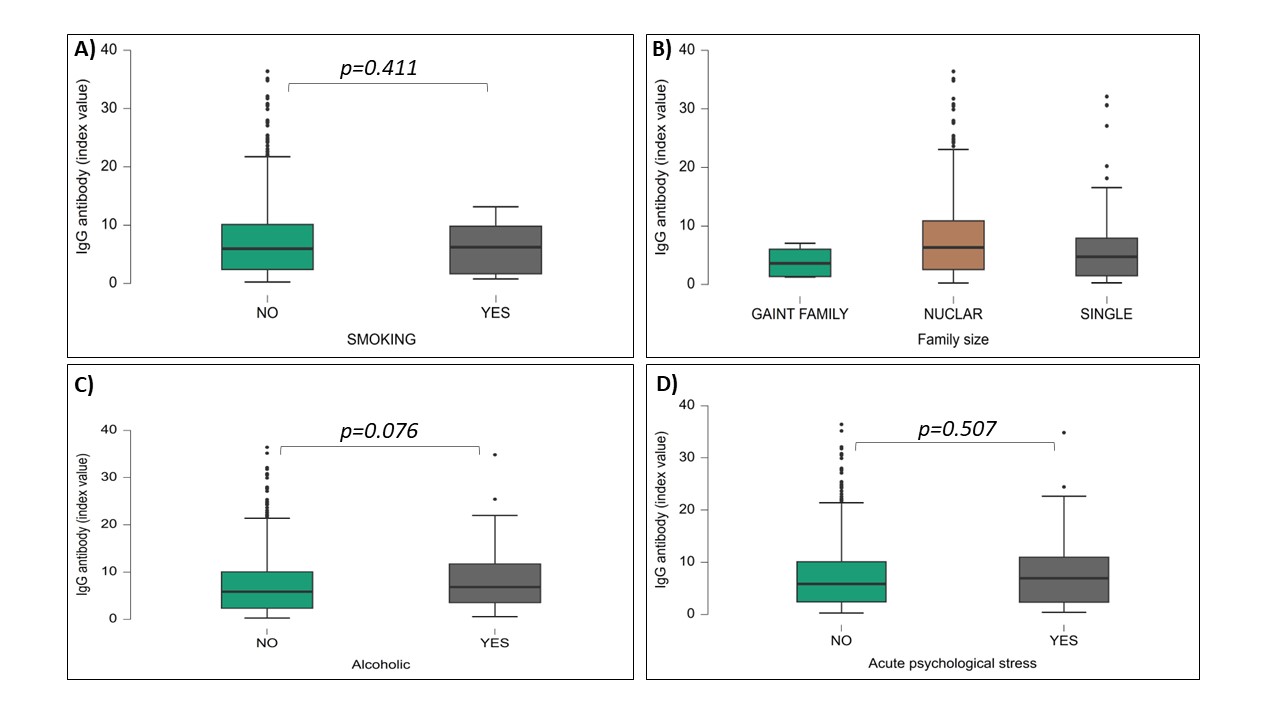
**Figure S1:** Boxplot representing IgG antibody index value comparison in HCWs with the smoking habit (A), Family size (B), Alcoholic (B), and Acute psychological stress (D). *p-value* <0.05 indicates significant.


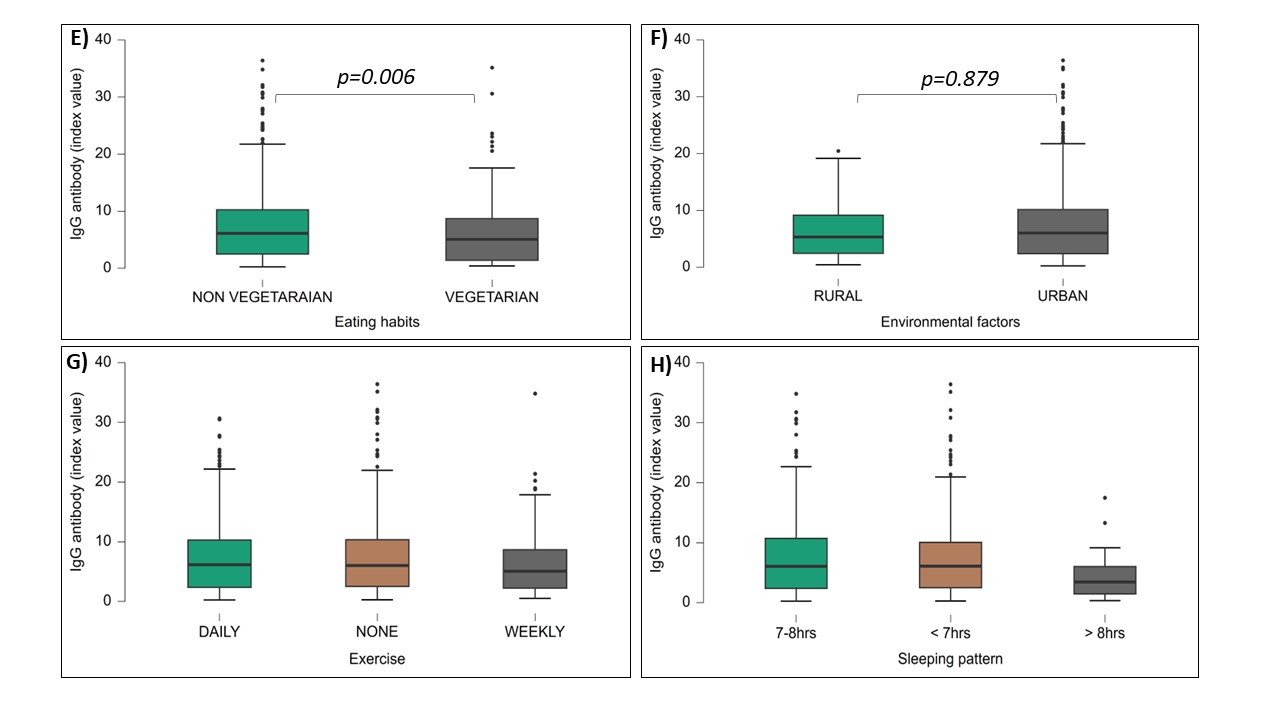


**Figure S2**: Boxplot representing IgG index value comparison in HCWs with eating habits (E), Environmental factors (F), exercise (G), and Sleeping pattern (G). *p-value* <0.05 indicates significant.


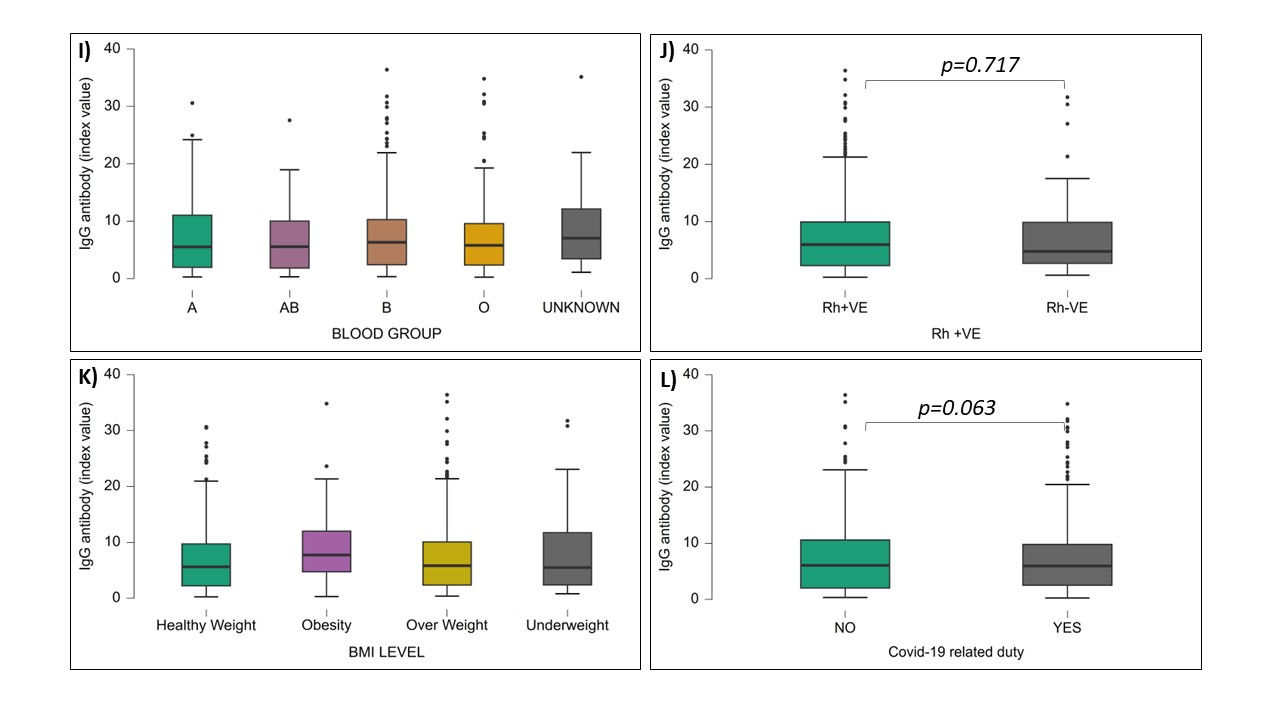


**Figure S3:** Boxplot representing IgG index value comparison in HCWs with different blood groups (I), Rh status (J), BMI level (K), and involved COVID-19-related duty (L). *p-value* <0.05 indicates significant.
