# Supplementary material for: Persistence of SARS-CoV-2 IgG and Its Avidity Compared with Neutralizing Antibodies among Health Care Workers in a Tertiary Care Hospital, South India – a One Year Follow Up Study
Source: Preprints.org preprint supplement (doi:10.20944/preprints202309.1211.v1), 2023-09-19
Supplement: Supplementary file 4 [file SUPPLYMENTARY FILE 3.docx]

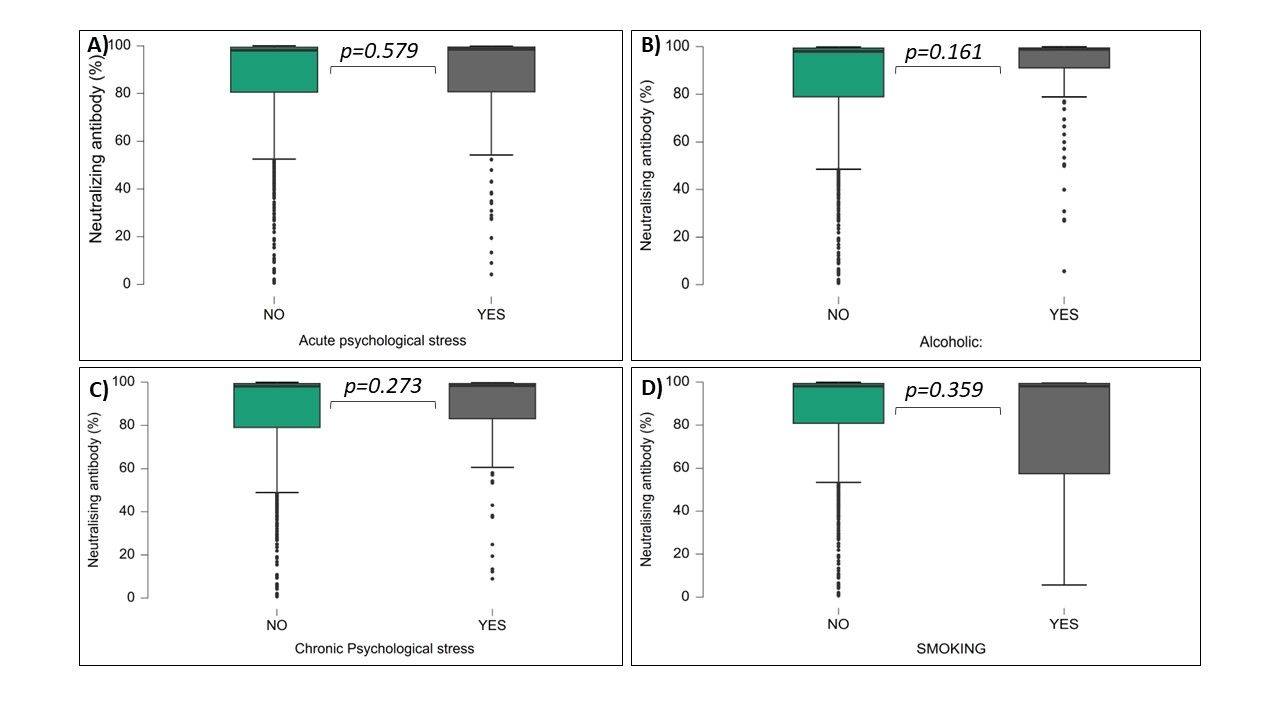
 **Figure S4**: Boxplot representing Neutralizing antibody percentage comparison in HCWs with Acute psychological stress (A), Alcoholic (B), Chronic Psychological stress (C), and Smoking (D). *p-value* <0.05 indicates significant.


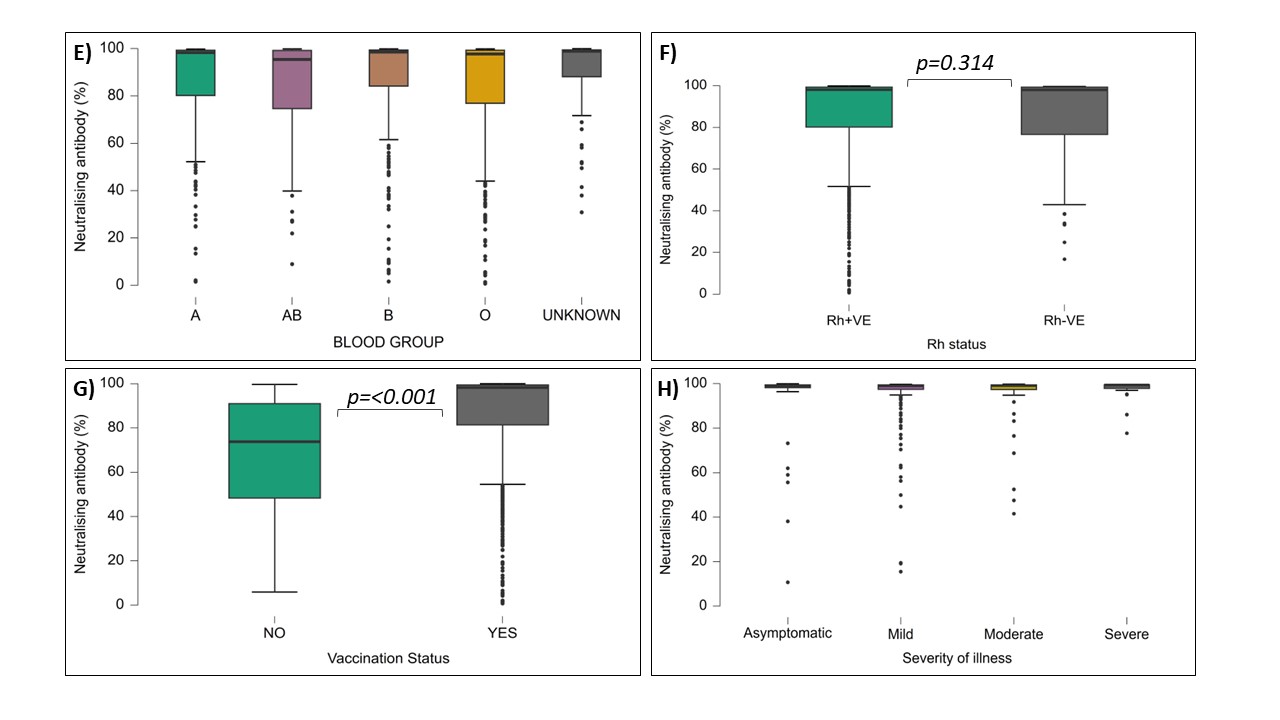


**Figure S5**: Boxplot representing Neutralizing antibody percentage comparison in HCWs with different blood groups (E), Rh Status (F), Vaccination status (G), and severity of illness during COVID-19 infection (H). *p-value* <0.05 indicates significant.


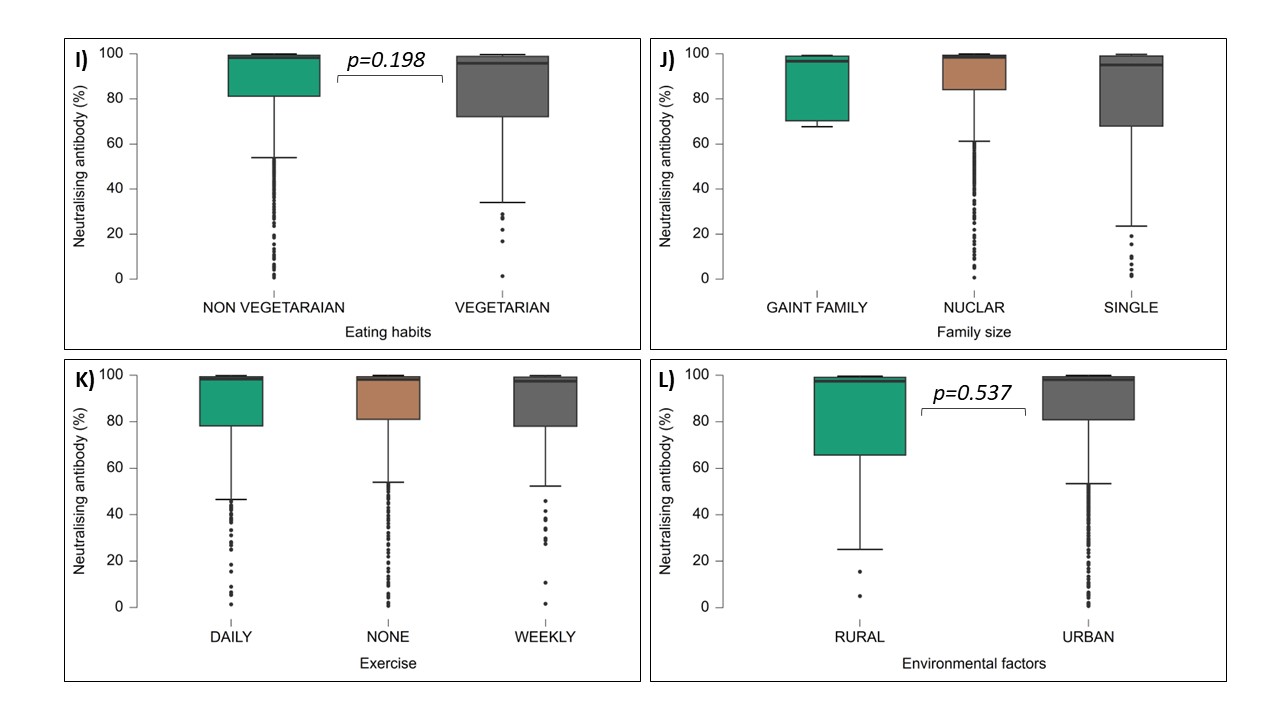


**Figure S6:** Boxplot representing Neutralizing antibody percentage comparison in HCWs with Eating habits (I), Family size (J), Exercise (K), and Environmental factors (L). *p-value* <0.05 indicates significant.
